# Supplementary material for: Lignocellulose-mediated selection of halophilic PET-degrading enzymes from mangrove soil
Source: Research Square preprint supplement (doi:10.21203/rs.3.rs-7600602/v1), 2025-09-30
Supplement: Supplementary file 1 [file 180fb7cd7fb6743efae0d71c.xlsx]

## Sheet: Catalytic
Enzyme_Name	Oxyanion_Y	Cat_S	Oxyanion_M	Cat_D	Cat_H	Disulfide_Bonds	Cysteine_Positions	Predicted_Bond_Pairs
503	61	131	132	177	209	1	242, 257	242-257
606	62	130	131	176	208	1	241, 259	241-259
701	52	131	132	177	209	1	242, 260	242-260
GlacPETase	N/A	144	145	193	224	1	35, 55	35-55
Isoptericola_ERR12772908__k127_861695_14	98	167	168	213	245	1	278, 295	278-295
Isoptericola_ERR12779715__k127_2806838_3	98	167	168	213	245	1	278, 295	278-295
L11_Myceligenerans	102	170	171	216	246	1	279, 295	279-295
L8_Streptomyces	70	138	139	184	216	1	249, 265	249-265
LCC	61	131	132	176	208	1	241, 258	241-258
Microbulbifer_ERR12772901__k127_721586_2	90	163	164	214	247	1	32, 38	32-38
Microbulbifer_ERR12779715__k127_1039666_2	93	166	167	217	250	1	35, 41	35-41
Micromonosopora_ERR12772901__k127_1301752_3	101	169	170	213	245	1	20, 278, 293	278-293
Micromonosopora_ERR12772908__k127_1276758_2	N/A	204	205	250	282	1	315, 331	315-331
Micromonosopora_ERR12772908__k127_878592_2	N/A	212	213	258	290	1	26, 323, 339	323-339
PHL7	N/A	131	132	177	209	1	242, 257	242-257
Spirillospora_ERR12772901__k127_86259_3	N/A	162	163	208	240	1	273, 289	273-289
Streptomyces_ERR12772901__k127_1254225_2	98	167	168	213	245	1	278, 295	278-295
T_curvata	N/A	159	160	205	237	1	270, 286	270-286
T_halotolerans	61	131	132	177	209	1	242, 260	242-260
HaloPETase1	N/A	155	N/A	205	235	2	64, 126, 272, 275	Non-standard pattern
HaloPETase5	101	174	175	218	250	2	215, 252, 286, 303	215-252, 286-303
Halopseudomonas_bauzanensis	N/A	171	172	215	247	2	212, 249, 283, 300	212-249, 283-300
IsPETase	87	160	161	206	237	2	203, 239, 273, 289	203-239, 273-289
403	N/A	151	152	197	229	3	18, 21, 194, 231, 265, 282	18-21, 194-231, 265-282
Marinobacter_ERR12772908__k127_2792925_3	N/A	175	176	221	253	3	40, 44, 218, 255, 289, 306	40-44, 218-255, 289-306
Marinobacter_ERR12779715__k127_2664185_2	N/A	174	175	220	252	3	39, 43, 217, 254, 288, 305	39-43, 217-254, 288-305
