# Supplementary material for: Lignocellulose-mediated selection of halophilic PET-degrading enzymes from mangrove soil
Source: Research Square preprint supplement (doi:10.21203/rs.3.rs-7600602/v1), 2025-09-30
Supplement: Supplementary file 2 [file 24a653036f2012e4023f8067.xlsx]

## Sheet: Lignin-Catabolizing Enzymes
KO ID	Gene or Protein ID; Enzyme [EC Number]	Function or metabolic pathway within the lignin transformation processes
K00001	adh; alcohol dehydrogenase [EC:1.1.1.1]	Probably involved in Funneling pathway: coniferyl alcohol
K00055	aryl-alcohol dehydrogenase [EC:1.1.1.90]	Probably involved in Funneling pathway: coniferyl alcohol
K00103	L-gulonolactone oxidase [EC:1.1.3.8]	Depolymerization of lignin -oxidative stress response
K00104	glcD; glycolate oxidase [EC:1.1.3.15]	Depolymerization of lignin -oxidative stress response
K00121	frmA, ADH5, adhC; S-(hydroxymethyl)glutathione dehydrogenase / alcohol dehydrogenase [EC:1.1.1.284 1.1.1.1]	Catabolism of aromatic compouds
K00128	aldehyde dehydrogenase (NAD+) [EC:1.2.1.3]	Probably involved in syringaldehyde catabolism
K00231	PPOX, hemY; oxygen-dependent protoporphyrinogen oxidase [EC:1.3.3.4]	Depolymerization of lignin -oxidative stress response
K00232	ACOX1, ACOX3; acyl-CoA oxidase [EC:1.3.3.6]	Depolymerization of lignin -oxidative stress response
K00297	metF; methylenetetrahydrofolate reductase (NADPH) [EC:1.5.1.20]	O demethylation/C1 metabolism
K00432	glutathione peroxidase [EC:1.11.1.9]	Depolymerization of lignin -oxidative stress response
K00446	dmpB; catechol 2,3-dioxygenase [EC:1.13.11.2]	Fission pathway: catechol meta-cleavage pathway
K00448	pcaG; protocatechuate 3,4-dioxygenase, alpha subunit [EC:1.13.11.3]	Fission pathway: beta-ketoadipate pathway: Protocatechuate branch
K00449	pcaH; protocatechuate 3,4-dioxygenase, beta subunit [EC:1.13.11.3]	Fission pathway: beta-ketoadipate pathway: Protocatechuate branch
K00450	gentisate 1,2-dioxygenase [EC:1.13.11.4]	Fission pathway: gentisate-cleavage pathway
K00529	hcaD; ferredoxin--NAD+ reductase [EC:1.18.1.3]	Phenylpropionic acid metabolism
K00560	thyA; thymidylate synthase [EC:2.1.1.45]	Tolerance to lignocellulose-derived inhibitors (e.g. furanic compunds)
K00799	GST, gst; glutathione S-transferase [EC:2.5.1.18]	Depolymerization of lignin -oxidative stress response
K00965	galT, GALT; UDPglucose--hexose-1-phosphate uridylyltransferase [EC:2.7.7.12]	Transporter of gallate and protocatechuate
K01031	pcaI; 3-oxoadipate CoA-transferase, alpha subunit [EC:2.8.3.6]	Fission pathway: beta-ketoadipate pathway: Protocatechuate branch
K01032	pcaJ; 3-oxoadipate CoA-transferase, beta subunit [EC:2.8.3.6]	Fission pathway: beta-ketoadipate pathway: Protocatechuate branch
K01055	pcaD; 3-oxoadipate enol-lactonase [EC:3.1.1.24]	Fission pathway: beta-ketoadipate pathway: Protocatechuate branch
K01607	pcaC; 4-carboxymuconolactone decarboxylase [EC:4.1.1.44]	Fission pathway: beta-ketoadipate pathway: Protocatechuate branch
K01784	galE, GALE; UDP-glucose 4-epimerase [EC:5.1.3.2]	Tolerance to lignocellulose-derived inhibitors (e.g. furanic compunds)
K01856	catB; muconate cycloisomerase [EC:5.5.1.1]	Fission pathway: beta-ketoadipate pathway: Catechol branch
K01857	pcaB; 3-carboxy-cis,cis-muconate cycloisomerase [EC:5.5.1.2]	Fission pathway: beta-ketoadipate pathway: Protocatechuate branch
K03381	catA; catechol 1,2-dioxygenase [EC:1.13.11.1]	Fission pathway: beta-ketoadipate pathway: Catechol branch
K03464	catC; muconolactone D-isomerase [EC:5.3.3.4]	Fission pathway: beta-ketoadipate pathway: Catechol branch
K03465	thyX, thy1; thymidylate synthase (FAD) [EC:2.1.1.148]	Tolerance to lignocellulose-derived inhibitors (e.g. furanic compunds)
K03781	katE, CAT, catB, srpA; catalase [EC:1.11.1.6]	Depolymerization of lignin -oxidative stress response
K03782	katG; catalase-peroxidase [EC:1.11.1.21]	Depolymerization of lignin -oxidative stress response
K03862	vanA; vanillate monooxygenase [EC:1.14.13.82]	Funneling pathway: vanillin I
K03863	vanB; vanillate monooxygenase [EC:1.14.13.82]	Funneling pathway: vanillin I
K04097	gst; glutathione S-transferase [EC:2.5.1.18]	Depolymerization of lignin -oxidative stress response
K04099	desB, galA; gallate dioxygenase [EC:1.13.11.57]	Funneling pathway: syringic acid I
K04100	ligA; protocatechuate 4,5-dioxygenase, alpha chain [EC:1.13.11.8]	Fission pathway: protocatechuate 4,5-cleavage pathway
K04101	ligB; protocatechuate 4,5-dioxygenase, beta chain [EC:1.13.11.8]	Fission pathway: protocatechuate 4,5-cleavage pathway
K04564	SOD2; superoxide dismutase, Fe-Mn family [EC:1.15.1.1]	Depolymerization of lignin -oxidative stress response
K04565	SOD1; superoxide dismutase, Cu-Zn family [EC:1.15.1.1]	Depolymerization of lignin -oxidative stress response
K04618	galactose oxidase [EC:1.1.3.9]	Depolymerization of lignin -oxidative stress response
K05708	hcaA1, hcaE; 3-phenylpropionate/cinnamic acid dioxygenase subunit alpha [EC:1.14.12.19]	Phenylpropionic acid metabolism
K05709	hcaA2, hcaF; 3-phenylpropionate/cinnamic acid dioxygenase subunit beta [EC:1.14.12.19]	Phenylpropionic acid metabolism
K05710	hcaC, bphF; dioxygenase ferredoxin subunit	Phenylpropionic acid metabolism
K05711	hcaB; 2,3-dihydroxy-2,3-dihydrophenylpropionate dehydrogenase [EC:1.3.1.87]	Phenylpropionic acid metabolism
K05783	benD-xylL; dihydroxycyclohexadiene carboxylate dehydrogenase [EC:1.3.1.25 1.3.1.-]	Funneling pathway: benzoic acid
K05917	CYP51; cytochrome P450, family 51 (sterol 14-demethylase) [EC:1.14.13.70]	Funneling pathway: guaiacol
K07519	phthalate 4,5-dioxygenase [EC:1.14.12.7]	Catabolism of aromatic compouds
K07823	pcaF; 3-oxoadipyl-CoA thiolase [EC:2.3.1.174]	Fission pathway: beta-ketoadipate pathway: Protocatechuate branch
K08686	2-chlorobenzoate 1,2-dioxygenase [EC:1.14.12.13]	Funneling pathway: benzoic acid
K08689	bphA; biphenyl 2,3-dioxygenase subunit alpha [EC:1.14.12.18]	Catabolism of aromatic compouds
K10218	ligK, galC; 4-hydroxy-4-methyl-2-oxoglutarate aldolase [EC:4.1.3.17]	Fission pathway: protocatechuate 4,5-cleavage pathway
K10219	ligC; 2-hydroxy-4-carboxymuconate semialdehyde hemiacetal dehydrogenase [EC:1.1.1.312]	Fission pathway: protocatechuate 4,5-cleavage pathway
K10220	ligJ; 4-oxalmesaconate hydratase [EC:4.2.1.83]	Funneling pathway: syringic acid I/Fission pathway: protocatechuate 4,5-cleavage pathway
K10221	ligI; 2-pyrone-4,6-dicarboxylate lactonase [EC:3.1.1.57]	Fission pathway: protocatechuate 4,5-cleavage pathway
K10783	trans-2-enoyl-CoA reductase (NAD+) [EC:1.3.1.44]	Probably involved in ferulic acid catabolism
K11187	PRDX5; peroxiredoxin 5, atypical 2-Cys peroxiredoxin [EC:1.11.1.15]	Depolymerization of lignin -oxidative stress response
K11188	PRDX6; peroxiredoxin 6, 1-Cys peroxiredoxin [EC:1.11.1.7 1.11.1.15 3.1.1.-]	Depolymerization of lignin -oxidative stress response
K11517	HAO; (S)-2-hydroxy-acid oxidase [EC:1.1.3.15]	Depolymerization of lignin -oxidative stress response
K11945	phdF; extradiol dioxygenase [EC:1.13.11.-]	Catabolism of aromatic compouds
K13279	PRDX1; peroxiredoxin 1 [EC:1.11.1.15]	Depolymerization of lignin -oxidative stress response
K14338	cypD_E, CYP102A2_3; cytochrome P450 / NADPH-cytochrome P450 reductase [EC:1.14.14.1 1.6.2.4]	Funneling pathway: guaiacol

## Sheet: Enriched Enzymmes
Category	MAG	KO ID	p-value	Enzyme	Pathway
A	L_2	ko:K04564	0	SOD2; superoxide dismutase, Fe-Mn family [EC:1.15.1.1]	Depolymerization of lignin -oxidative stress response
F	L_5	ko:K00231	0.000199558	PPOX, hemY; oxygen-dependent protoporphyrinogen oxidase [EC:1.3.3.4]	Depolymerization of lignin -oxidative stress response
A	L_1	ko:K03781	0.000200307	katE, CAT, catB, srpA; catalase [EC:1.11.1.6]	Depolymerization of lignin -oxidative stress response
C	LW_4	ko:K03781	0.000656524	katE, CAT, catB, srpA; catalase [EC:1.11.1.6]	Depolymerization of lignin -oxidative stress response
B	CW_1	ko:K00799	0.000519831	GST, gst; glutathione S-transferase [EC:2.5.1.18]	Depolymerization of lignin -oxidative stress response
B	CW_11	ko:K00799	0.000620724	GST, gst; glutathione S-transferase [EC:2.5.1.18]	Depolymerization of lignin -oxidative stress response
E	L_12	ko:K00799	0.000519831	GST, gst; glutathione S-transferase [EC:2.5.1.18]	Depolymerization of lignin -oxidative stress response
F	P_2	ko:K00799	0.000185684	GST, gst; glutathione S-transferase [EC:2.5.1.18]	Depolymerization of lignin -oxidative stress response
F	P_9	ko:K00799	0.000809948	GST, gst; glutathione S-transferase [EC:2.5.1.18]	Depolymerization of lignin -oxidative stress response
A	LW_12	ko:K00432	0.000163924	glutathione peroxidase [EC:1.11.1.9]	Depolymerization of lignin -oxidative stress response
B	C_14	ko:K00232	0.00079675	ACOX1, ACOX3; acyl-CoA oxidase [EC:1.3.3.6]	Depolymerization of lignin -oxidative stress response
E	PW_1	ko:K03464	0.000593216	catC; muconolactone D-isomerase [EC:5.3.3.4]	Fission pathway: beta-ketoadipate pathway: Catechol branch
A	LW_1	ko:K03381	0.000115562	catA; catechol 1,2-dioxygenase [EC:1.13.11.1]	Fission pathway: beta-ketoadipate pathway: Catechol branch
E	C_11	ko:K03381	0.000172686	catA; catechol 1,2-dioxygenase [EC:1.13.11.1]	Fission pathway: beta-ketoadipate pathway: Catechol branch
C	L_11	ko:K01031	0	pcaI; 3-oxoadipate CoA-transferase, alpha subunit [EC:2.8.3.6]	Fission pathway: beta-ketoadipate pathway: Protocatechuate branch
B	C_10	ko:K01055	0.000291538	pcaD; 3-oxoadipate enol-lactonase [EC:3.1.1.24]	Fission pathway: beta-ketoadipate pathway: Protocatechuate branch
E	P_7	ko:K01607	0.000441254	pcaC; 4-carboxymuconolactone decarboxylase [EC:4.1.1.44]	Fission pathway: beta-ketoadipate pathway: Protocatechuate branch
F	C_3	ko:K00446	0.000374699	dmpB; catechol 2,3-dioxygenase [EC:1.13.11.2]	Fission pathway: catechol meta-cleavage pathway
F	C_16	ko:K00446	7.80816e-05	dmpB; catechol 2,3-dioxygenase [EC:1.13.11.2]	Fission pathway: catechol meta-cleavage pathway
B	CW_8	ko:K00450	0.000518982	gentisate 1,2-dioxygenase [EC:1.13.11.4]	Fission pathway: gentisate-cleavage pathway
E	PW_1	ko:K00450	0.000695053	gentisate 1,2-dioxygenase [EC:1.13.11.4]	Fission pathway: gentisate-cleavage pathway
B	CW_5	ko:K10219	0.000170048	ligC; 2-hydroxy-4-carboxymuconate semialdehyde hemiacetal dehydrogenase [EC:1.1.1.312]	Fission pathway: protocatechuate 4,5-cleavage pathway
B	CW_11	ko:K10219	0.000602871	ligC; 2-hydroxy-4-carboxymuconate semialdehyde hemiacetal dehydrogenase [EC:1.1.1.312]	Fission pathway: protocatechuate 4,5-cleavage pathway
F	C_7	ko:K05783	0.000548834	benD-xylL; dihydroxycyclohexadiene carboxylate dehydrogenase [EC:1.3.1.25 1.3.1.-]	Funneling pathway: benzoic acid
C	LW_14	ko:K05917	0.000200307	CYP51; cytochrome P450, family 51 (sterol 14-demethylase) [EC:1.14.13.70]	Funneling pathway: guaiacol
E	CW_9	ko:K05917	9.24492e-05	CYP51; cytochrome P450, family 51 (sterol 14-demethylase) [EC:1.14.13.70]	Funneling pathway: guaiacol
F	C_2	ko:K10220	0.000134184	ligJ; 4-oxalmesaconate hydratase [EC:4.2.1.83]	Funneling pathway: syringic acid I/Fission pathway: protocatechuate 4,5-cleavage pathway
F	C_2	ko:K03863	0	vanB; vanillate monooxygenase [EC:1.14.13.82]	Funneling pathway: vanillin I
A	LW_7	ko:K00297	0	metF; methylenetetrahydrofolate reductase (NADPH) [EC:1.5.1.20]	O demethylation/C1 metabolism
B	CW_3	ko:K05710	1.99596e-06	hcaC, bphF; dioxygenase ferredoxin subunit	Phenylpropionic acid metabolism
B	CW_2	ko:K05710	0.000507401	hcaC, bphF; dioxygenase ferredoxin subunit	Phenylpropionic acid metabolism
F	LW_12	ko:K00055	0.000533187	aryl-alcohol dehydrogenase [EC:1.1.1.90]	Probably involved in Funneling pathway: coniferyl alcohol
E	P_10	ko:K00001	0.000166884	adh; alcohol dehydrogenase [EC:1.1.1.1]	Probably involved in Funneling pathway: coniferyl alcohol
E	P_3	ko:K01784	0.00027649	galE, GALE; UDP-glucose 4-epimerase [EC:5.1.3.2]	Tolerance to lignocellulose-derived inhibitors (e.g. furanic compunds)
A	LW_16	ko:K00965	0.000141242	galT, GALT; UDPglucose--hexose-1-phosphate uridylyltransferase [EC:2.7.7.12]	Transporter of gallate and protocatechuate

## Sheet: HeatMap Enriched Enzymes
MAG IDs	ko:K00001	ko:K00055	ko:K00231	ko:K00232	ko:K00297	ko:K00432	ko:K00446	ko:K00450	ko:K00799	ko:K00965	ko:K01031	ko:K01055	ko:K01607	ko:K01784	ko:K03381	ko:K03464	ko:K03781	ko:K03863	ko:K04564	ko:K05710	ko:K05783	ko:K05917	ko:K10219	ko:K10220
L_1	0	0	0	0	0	0	0	0	0	0	0	0	0	0	0	0	1	0	0	0	0	0	0	0
L_3	1.5	0	0	0	1	0	0	0	0	0	0	0	0	1	0	0	0	0	2	0	0	0	0	0
L_2	0	0	0	0	0	0	0	0	0	0	0	0	0	0	0	0	0	0	1	0	0	0	0	0
LW_16	1	0	0	0	0	0	0	0	0	1	0	0	0	0	0	0	0	0	0	0	0	0	0	0
LW_7	0	0	0	0	1	0	0	0	0	0	0	0	0	0	0	0	0	0	0	0	0	0	0	0
LW_3	0	0	0	0	1.5	1	0	0	0	1	0	0	0	2.08333	0	0	0	0	0	0	0	0	0	0
LW_1	0	0	0	0	0	0	0	0	0	0	0	0.5	0	1	1	0	0	0	0	0	0	0	0	0
LW_12	0	1	0	0	1	2	0	0	0	0	0	0	1	0.5	0	0	0	0	0	0	0	0	0	0
LW_13	0	0	0	0	0	1	0	0	0	0	0	0	0	1	0	0	0	0	1	0	0	0	0	0
P_8	1	0	0	0	0	0	0	0	0	0	0	0	0	1	0	0	0	0	0	0.25	0	0	0	0.333333
C_9	0	0	1	0	1	1	0	0	2	0	0	0	0	3.5	0	0	2	0	1	0.5	0	0	0	0.5
C_4	0.5	0	0	0	0	0	0	1	2	0	0	2	2	0	0	0	0	0	0	0	0	0	0	0
C_10	0.5	0	0.5	1	0	0	0	0	0	0	0	3	0	1.5	0	0	0	0	2	0	0	0	0	0
CW_1	0	0	0	0	2	0	0	0	6	0	0	0	0	0	0	0	0	0	0	0	0	0	0	0
CW_10	0	0	0	0	1	0	0	0	1.5	0	0	0	4	0	0	0	0	0	0	0	0	0	0	0
CW_8	0.5	0	0	0	1	0	0	2.5	3	0	0	0	0	0	0	0	0	0	0	0	0	0	1	1.5
CW_5	0	0	0	0	1	0	0	0	3	0	0	0	2	1	0	0	0	0	0	0	0	0	2	0.5
C_14	0	0	0	1	0	0	0	0	0	0	0	0	0	1	0	0	0	0	1	0	0	0	0	0
CW_3	1	0	0	0	0	0	0	0	0	0	0	0	1	0	0	0	0	0	1	4	0	0	0	0
CW_7	0	0	0	0	0	0	0	0	0	0	0	0.5	0	3	0	0	0	0	1	0	0	0	0	0
CW_6	1	1	0	0	2	1	1	1.5	9.5	0	0	1	4	1	2	0	0	0	0	0	0	0	0	1.5
CW_14	1	0	0	0	0	0	0	0	0	0	0	0.5	0	2	0	0	0	0	1	1	0	0	0	0
CW_11	0	0	0	0	0	0	0	1	7.5	0	0	0	3	1	0	0	0	0	1	0	0	0	2	0
CW_2	0	0	0	0	0	0	0	0	0	1	0	1.5	1	2.5	0	0	0	0	1	3	0	0	0	0
CW_12	0	0	0	0	1	0	0	0	0	0	0	0	0	0	0	0	0	0	0	0.5	0	0	0	0
L_9	2	0	0	0	2	1	0	0	5	0	0	0.5	0	1	1	0	0	0	1	0	0	0	0	0
L_8	0.5	0	0	0	1	0	0	0	0	0	0	0	2	3	0	0	1	0	2	1	0	0	0	0
LW_5	2	0	0	0	0	1	0	0	1	0	0	0	0	1.5	1	0	0	0	1	0	0	0	0	0
L_7	1	0	0	1	0	0	0	0	0	0	0.25	0	0	2	0	0	0	0	1	0	1	0	0	0
L_11	1.83333	0	1	1	1	1	1	0	0	0.5	1	0	1	1	0	0	1	0	2	1	0	0	0	0
L_6	0.5	0	1	0	0	0	0	0	0	0	0	0	0	2.33333	0	0	1	0	2	0	0	0	0	0
LW_4	0	0	1	0	0.5	1	0	0	0	0	0	0	1	0	0	0	2	0	2	0	0	0	0	0
L_14	1.5	0	1	0	1	0	0	0	0	1	0	0	0	3.5	0	0	1	0	1	1.5	0	0	0	0
LW_9	0	0	0	0	0.5	0	0	0	0	0	0	0	1	1	0	0	0	0	0	0	0	0	0	0
LW_10	0	0	0	0	1	0	0	0	3	0	0	1	2	1	0	0	0	0	0	0	0	0	1	0
P_11	0.5	0	0	0	0.5	0	0	0	0	0	0	1	1	1.33333	0	0	0	0	0	0	0	0	1	0
P_4	0.833333	0	0	0	1	0	0	0	1	0	0	1	1	0	0	0	0	0	0	0	0	0	0	0
LW_15	0	0	0	0	2.5	0	0	0	0	1	0	0	3.5	4.5	0	0	0	0	0	0	0	0	0	0
LW_14	1	0	0	0	2.5	0	0	0	0	0	0	0	0	2.5	0	0	0	0	1	1	1	1	0	0
CW_13	0	0	1	0	0	0	0	0	0	1	0	0	0	1	0	0	0	0	0	0	0	0	0	0
CW_9	0.5	0	0	0	1	0	0	0	2	0	0	0	0	1	0	0	0	0	0	0	0	1	0	0
C_12	2	0	0	0	1	1	0	0	1.25	0	0	0	0	1	0	0	0	0	0	0	0	0	0	0
L_12	1	0	0	0	1	1	0	0	6.5	0	0	0	2	1	0	0	0	0	1	0	0	0	0	0
LW_6	0	0	1	0	1	0	0	0	0	0	0	0	0	0	0	0	0	0	0	1.5	0	0	0	0
C_11	1.83333	0	1	0	0	0	0	0	0	1	0	0	3	3.5	3	1	1	0	1	0	1	0	0	0
P_5	0	0	0	0	1	0	0	0	2	0	0	0	0	0	0	0	0	0	1	0	0	0	0	0
PW_1	0	0	0	0	1	0	0	2	2	0	0	0	2	2.5	0	1	0	0	1	2	0	0	0	0
C_13	0	0	0	0	1.5	0	0	0	0	0	0	1	0	0.833333	0	0	0	0	0	1	0	0	0	0
L_13	0	1	1	0	0	0	0	0	0	1	0	0	0	2.5	0	0	0	0	0	1	0	0	0	0
L_10	0	0	0	0	1	0	0	0	1	0	0	0	0.5	1	0	0	0	0	0	0.25	0	0	0	0
P_10	4.5	0	0	0	1	0	0	0	0	0	0	0.333333	0	2	0	0	0	0	1	0	0	0	0	0
C_5	2.2	0	0	0	2	0	1	0	1	0	0	3	3	0.5	0	0	0	0	0	1	0	0	0	1
C_15	0	0	0	0	1	1	0	0	3	0	0	1	1	3.5	1	0	0	0	0	0	0	0	0	0
CW_4	0	0	0	0	1	0	0	0	0	1	0	0	0.5	0.5	0	0	0	0	1	0.5	0	0	0	0
C_1	0.5	0	0	1	1	0	0.5	0	0	0	0	0	1	2	0	0	0	0	0	0	0	0	0	0
P_3	0	0	0	0	0	0	0	0	0	0	0	1	0	6	0	0	0	0	0	1	0	0	0	0
P_7	1	0	0	0	0	0	0	0.5	5.5	0	0	3	6	0	1	0	0	0	0	0.5	0	0	0	0.5
P_1	2.5	1	1	0	0	0	0	0	0	0	0	0	0	3.5	0	0	1	0	2	0	0	0	0	0
C_6	0	0	0	0	0	0	0	0	1	0	0	1	0.5	2.5	0	0	0	0	0	1	0	0	0	0
C_2	0.333333	0	0	0	2	0	0	0	0	0	0	2	2	0	0	0	0	1	0	0	0	0	0	2
C_3	1.16667	0	0	1	1	0	2	0	0	0	0	0	0	3	0	0	0	0	0	2.5	0	0	0	0
C_16	1	0	0	0	0	0	2	0	0	0	0	1	0	0	0	0	0	0	0	1	0	0	0	0.5
C_7	0	0	0	0	0.5	0	1	0	0	0	0	0	0	2	0	0	0	0	1	0.5	1	0	0	0
P_2	1.5	0	0	0	1	0	0	0	6.5	0	0	0	0	2	0	0	0	0	1	0	0	0	0	0
P_9	1	0	0	0	1.5	0	0	0	6.5	0	0	0	0	0.5	0	0	0	0	1	0	0	0	1	0
PW_2	1	0	0	0	1	0	0	0	3	0	0	0	0	3	0	0	1	0	1	1	0	0	0	0
LW_11	1	1	1	0	2	2	0	0	0	0	0	1	1	3.5	0	0	0	0	1	1	0	0	0	0
C_8	2	0	0	0	1	1	0	0	0	0	0	0	0	2	0	0	0	0	1	0	0	0	0	0
P_6	0	0	0	0	1	0	0	0	3	0	0	0	1	0.5	0	0	0	0	1	0	0	0	0	0
LW_8	0	0	0	0	1	0	0	0	0	1	0	0	0	1	0	0	1	0	0	0	0	0	0	0
L_5	0.333333	0	2	0	1	0	0	0	0	1	0	0	0.5	2	0	0	0	0	0	2	0	0	0	0
LW_17	0	0	0	0	0.5	0	0	0	1	0	0	0	0	2	0	0	0	0	0	0	0	0	0	0
LW_2	0.5	0	0	0	0	0	0	0	2	0	0	1	0	2	0	0	0	0	0	0	0	0	0	0
