# Supplementary material for: Lignocellulose-mediated selection of halophilic PET-degrading enzymes from mangrove soil
Source: Research Square preprint supplement (doi:10.21203/rs.3.rs-7600602/v1), 2025-09-30
Supplement: Supplementary file 3 [file 28abb43b1924a30f8488046b.xlsx]

## Sheet: PAZy
MAG IDs	Taxonomyc Code	Category	Query_ID	Subject_ID	Microbial host/enzyme/gene	EC number	Reference	GenBank/ UniProt/MGnify	Percentage_Identity	Alignment_Length	Mismatches	Gap_Openings	Query_Start	Query_End	Subject_Start	Subject_End	E-value	BitScore
LW_3	Latescibacterales	A	Prodigal_500|LOCUS_04990	101					50.3	145	63	3	117	255	2	143	3.96e-41	141
CW_7	E44-bin32 (b)	B	Prodigal_112|LOCUS_01050	202					60.5	38	15	0	137	174	34	71	1.73e-08	47.8
C_9	JABDQX01	B	Prodigal_1756|LOCUS_15780	PpEst					52.8	178	84	0	46	223	24	201	1.08e-63	189
CW_1	Woeseiaceae (a)	B	Prodigal_1100|LOCUS_10660	PpEst					51.1	178	87	0	1	178	24	201	4.13e-67	197
CW_10	UBA6522 (c)	B	Prodigal_1983|LOCUS_17610	102					51.1	223	90	5	34	250	11	220	1.96e-69	217
CW_11	UBA6522 (d)	B	Prodigal_609|LOCUS_05310	PpEst					51.0	196	95	1	1	195	6	201	2.98e-67	197
CW_10	UBA6522 (c)	B	Prodigal_402|LOCUS_03850	PpEst					50.5	186	91	1	19	203	16	201	6.04e-63	187
CW_6	Methyloligellaceae	B	Prodigal_4318|LOCUS_37260	202					50.0	40	20	0	143	182	34	73	1.03e-07	45.4
LW_4	Bacillaceae_C	C	Prodigal_1460|LOCUS_12330	HG-4					99.6	254	1	0	1	254	1	254	7.32e-192	517
L_11	Cellulomonadaceae	C	Prodigal_1265|LOCUS_12400	Cut190	Saccharomonospora (Thermoactinomyces) viridis AHK190, Cut190	EC 3.1.1.74	Miyakawa, 2014; Kawai, 2014; Oda, 2018	W0TJ64	69.1	249	72	3	53	297	57	304	1.17e-118	336
L_11	Cellulomonadaceae	C	Prodigal_1265|LOCUS_12400	PHL-2	Compost metagenome, PHL-2		Sonnendecker, 2022	SAY37582.1	68.2	245	75	2	54	295	14	258	1.87e-114	323
L_8	Streptomycetaceae	C	Prodigal_2206|LOCUS_19680	202	Chloroflexus sp. MS-G, Enzyme 202		Erickson, 2022	YNPsite05_CeleraDRAFT_401410	67.7	31	10	0	266	296	38	68	5.80e-07	43.5
L_11	Cellulomonadaceae	C	Prodigal_1265|LOCUS_12400	PHL-1	Compost metagenome, PHL-1		Sonnendecker, 2022	SAY37579.1	67.5	246	77	2	55	297	15	260	3.07e-113	320
L_11	Cellulomonadaceae	C	Prodigal_1265|LOCUS_12400	607-Nsp					67.3	245	77	2	54	295	62	306	1.45e-113	323
L_8	Streptomycetaceae	C	Prodigal_504|LOCUS_04760	607-Nsp					65.3	222	75	1	47	266	86	307	1.95e-103	296
L_11	Cellulomonadaceae	C	Prodigal_1265|LOCUS_12400	Thh_Est	T. halotolerans, Thh_Est	EC 3.1.1.1	Ribitsch, 2012	H6WX58	64.9	251	79	6	54	297	14	262	6.34e-106	302
L_8	Streptomycetaceae	C	Prodigal_504|LOCUS_04760	PET40	Amycolatopsis bacterium, PET40		Zhang, 2023	WAU86704.1	64.0	222	78	1	47	266	39	260	4.44e-101	288
L_11	Cellulomonadaceae	C	Prodigal_1265|LOCUS_12400	PET40	Amycolatopsis bacterium, PET40		Zhang, 2023	WAU86704.1	63.3	245	87	2	54	295	15	259	1.73e-108	308
L_11	Cellulomonadaceae	C	Prodigal_1265|LOCUS_12400	606	Marinactinospora thermotolerans, MtCut / Enzyme 606		Liu et al. 2022 Erickson, 2022,	WP_078759821.1	63.2	242	87	1	53	292	13	254	9.14e-111	314
L_4	Sporolactobacillaceae (b)	C	Prodigal_1908|LOCUS_9410	Ces39_5					63.2	247	90	1	1	246	1	247	1.27e-116	327
L_8	Streptomycetaceae	C	Prodigal_504|LOCUS_04760	PET1	Caldimonas brevitalea, PET12 (PbCut;SbCut), AAW51_2473		Danso et al., 2018; Makryniotis et al., 2023	E8U721	62.5	224	82	1	46	267	91	314	2.28e-93	271
L_11	Cellulomonadaceae	C	Prodigal_1265|LOCUS_12400	Tcur_1278	T. curvata DSM43183, Tcur_1278	EC 3.1.1.74	Wei, 2014	D1A9G5	61.8	246	91	2	53	295	41	286	1.11e-105	302
L_11	Cellulomonadaceae	C	Prodigal_1265|LOCUS_12400	BTA-1	T. fusca DSM43793, BTA-1, TfH	EC 3.1.1.74	Dresler, 2006; Müller 2005; Kleeberg 1998; 2005	Q6A0I4	61.5	252	88	5	53	297	52	301	1.44e-101	292
L_11	Cellulomonadaceae	C	Prodigal_1265|LOCUS_12400	Cut2	T. fusca NRRL B-8184, Cut2	EC 3.1.1.74	Hedge, 2013	JN129500.1	61.5	252	88	5	53	297	52	301	1.44e-101	292
L_11	Cellulomonadaceae	C	Prodigal_1265|LOCUS_12400	TfCut_2	T. fusca, TfCut_2 (Cut-2.kw3)	EC 3.1.1.74	Furukawa, 2019, Roth, 2014; Wei 2016	E5BBQ3_THEFU	61.5	252	88	5	53	297	52	301	1.44e-101	292
L_11	Cellulomonadaceae	C	Prodigal_1265|LOCUS_12400	Tfu_0883	T. fusca (strain YX), WSH03-11, Tfu_0883	EC 3.1.1.74	Chen, 2008; Su, 2013; Lykidis, 2007	Q47RJ6_THEFY	61.5	252	88	5	53	297	52	301	1.44e-101	292
L_11	Cellulomonadaceae	C	Prodigal_1265|LOCUS_12400	Thc_Cut1	T. cellulosilytica DSM44535, Thc_Cut1	EC 3.1.1.74	Herrero Acero, 2011, Ribitsch 2017	ADV92526.1	61.5	252	88	5	53	297	13	262	4.35e-102	292
L_11	Cellulomonadaceae	C	Prodigal_1265|LOCUS_12400	Tcur0390	T. curvata DSM43183, Tcur0390	EC 3.1.1.74	Wei, 2014	ACY95991.1	61.3	248	91	3	53	295	43	290	9.96e-105	300
LW_4	Bacillaceae_C	C	Prodigal_1568|LOCUS_13120	Est18_23	Caldibacillus thermoamylovorans, Est18_23	EC 3.1.1.-	Yan, 2024	WP_041847557.1	61.2	484	187	1	5	487	2	485	4.2e-229	631
L_8	Streptomycetaceae	C	Prodigal_504|LOCUS_04760	606	Marinactinospora thermotolerans, MtCut / Enzyme 606		Liu et al. 2022 Erickson, 2022,	WP_078759821.1	61.2	224	83	2	47	266	37	260	1.48e-94	272
L_11	Cellulomonadaceae	C	Prodigal_1265|LOCUS_12400	702	T. fusca, Enzyme 702		Erickson, 2022	ADM47605.1	61.1	252	89	5	53	297	14	263	1.89e-100	288
L_8	Streptomycetaceae	C	Prodigal_504|LOCUS_04760	Cut190	Saccharomonospora (Thermoactinomyces) viridis AHK190, Cut190	EC 3.1.1.74	Miyakawa, 2014; Kawai, 2014; Oda, 2018	W0TJ64	60.9	225	83	3	47	267	81	304	8.59e-96	276
L_8	Streptomycetaceae	C	Prodigal_504|LOCUS_04760	PHL-2	Compost metagenome, PHL-2		Sonnendecker, 2022	SAY37582.1	60.8	222	85	1	47	266	38	259	5.35e-99	283
L_11	Cellulomonadaceae	C	Prodigal_1265|LOCUS_12400	701	T. fusca, Enzyme 701		Erickson, 2022	WP_104613137.1	60.3	252	91	5	53	297	13	262	5.22e-100	287
L_11	Cellulomonadaceae	C	Prodigal_1265|LOCUS_12400	Est119	T. alba AHK119, Est119, est2	EC 3.1.1.1	Kitadokoro, 2019	F7IX06	60.3	252	91	6	53	297	51	300	1.84e-99	287
L_11	Cellulomonadaceae	C	Prodigal_1265|LOCUS_12400	TfH42_Cut1	T. fusca DSM44342, TfH42_Cut1	EC 3.1.1.74	Herrero Acero, 2011	E9LVI0_THEFU	60.3	252	91	5	53	297	13	262	5.22e-100	287
LW_4	Bacillaceae_C	C	Prodigal_2346|LOCUS_18230	Ces39_5	Caldibacillus thermoamylovorans, Ces39_5	EC 3.1.1.1	Yan, 2024	WP_108898647.1	60.3	247	97	1	2	247	1	247	2.91e-108	305
L_8	Streptomycetaceae	C	Prodigal_504|LOCUS_04760	Thh_Est	T. halotolerans, Thh_Est	EC 3.1.1.1	Ribitsch, 2012	H6WX58	60.0	240	90	3	34	267	23	262	1.15e-98	282
L_11	Cellulomonadaceae	C	Prodigal_1265|LOCUS_12400	PHL-3	Compost metagenome, PHL-3		Sonnendecker, 2022	SAY37583.1	59.7	248	96	3	53	297	13	259	7.70e-99	284
L_11	Cellulomonadaceae	C	Prodigal_1265|LOCUS_12400	Thc_Cut2	T. cellulosilytica DSM44535, Thc_Cut2	EC 3.1.1.74	Herrero Acero, 2011 Ribitsch 2017	ADV92571	59.5	252	93	5	53	297	13	262	6.64e-99	284
L_11	Cellulomonadaceae	C	Prodigal_1265|LOCUS_12400	PHL-6	Compost metagenome, PHL-6		Sonnendecker, 2022	SAY37589.1	59.3	243	99	0	55	297	15	257	5.80e-103	294
L_11	Cellulomonadaceae	C	Prodigal_1265|LOCUS_12400	Est1(Hydrolase4,Enzyme708)	T. alba (AHK119), Est1 (Hydrolase 4); Enzyme 708	EC 3.1.1.1	Hu, 2010; Erickson, 2022	BAI99230	59.1	252	94	5	53	297	47	296	3.24e-99	286
L_8	Streptomycetaceae	C	Prodigal_504|LOCUS_04760	PHL-1	Compost metagenome, PHL-1		Sonnendecker, 2022	SAY37579.1	58.8	238	94	2	34	267	23	260	2.66e-99	284
L_11	Cellulomonadaceae	C	Prodigal_1265|LOCUS_12400	PHL-5	Compost metagenome, PHL-5		Sonnendecker, 2022	SAY37587.1	58.4	243	101	0	55	297	15	257	1.34e-101	291
L_11	Cellulomonadaceae	C	Prodigal_1265|LOCUS_12400	711	T. cellulosilytica, Enzyme 711		Erickson, 2022	WP_083947829.1	58.2	251	97	4	53	297	13	261	2.04e-99	285
L_11	Cellulomonadaceae	C	Prodigal_1265|LOCUS_12400	PHL-4	Compost metagenome, PHL-4		Sonnendecker, 2022	SAY37584.1	58.0	243	102	0	55	297	15	257	7.70e-101	289
LW_4	Bacillaceae_C	C	Prodigal_379|LOCUS_03490	Est8_89	Caldibacillus thermoamylovorans, Est8_89	EC:4.2.99.20	Yan, 2024	CEE00769.1	58.0	264	109	1	1	264	3	264	7.68e-110	311
L_8	Streptomycetaceae	C	Prodigal_504|LOCUS_04760	PHL-3	Compost metagenome, PHL-3		Sonnendecker, 2022	SAY37583.1	57.8	223	91	2	47	267	38	259	2.28e-90	261
L_8	Streptomycetaceae	C	Prodigal_504|LOCUS_04760	PHL-7(PES-H1;PES-H2)	Thermoanaerobacter sp. , PHL-7 (PES-H1; PES-H2)	EC 3.1.1.74	Sonnendecker, 2022; Pfaff, 2022	7NEI_A/B /7CUV_A, MBO2503201.1	57.8	223	91	2	47	267	38	259	1.19e-89	259
L_8	Streptomycetaceae	C	Prodigal_504|LOCUS_04760	711	T. cellulosilytica, Enzyme 711		Erickson, 2022	WP_083947829.1	57.7	239	96	3	34	267	23	261	2.43e-90	261
L_8	Streptomycetaceae	C	Prodigal_504|LOCUS_04760	611	Saccharopolyspora flava, Enzyme 611		Erickson, 2022	WP_093412886.1	57.6	238	97	2	34	267	24	261	1.38e-94	272
L_8	Streptomycetaceae	C	Prodigal_504|LOCUS_04760	TfCut_1	T. fusca, TfCut_1 (Cut-1.kw3) (only active on 3PET; not on higher polymers!)	3.1.1.101	Herrero Acero, 2011	E5BBQ2	57.1	240	97	3	34	267	80	319	3.40e-91	265
L_8	Streptomycetaceae	C	Prodigal_504|LOCUS_04760	702	T. fusca, Enzyme 702		Erickson, 2022	ADM47605.1	56.7	240	98	3	34	267	24	263	6.88e-93	268
L_8	Streptomycetaceae	C	Prodigal_504|LOCUS_04760	BTA-1	T. fusca DSM43793, BTA-1, TfH	EC 3.1.1.74	Dresler, 2006; Müller 2005; Kleeberg 1998; 2005	Q6A0I4	56.7	240	98	3	34	267	62	301	6.74e-92	266
L_8	Streptomycetaceae	C	Prodigal_504|LOCUS_04760	Cut2	T. fusca NRRL B-8184, Cut2	EC 3.1.1.74	Hedge, 2013	JN129500.1	56.7	240	98	3	34	267	62	301	6.74e-92	266
L_8	Streptomycetaceae	C	Prodigal_504|LOCUS_04760	TfCut_2	T. fusca, TfCut_2 (Cut-2.kw3)	EC 3.1.1.74	Furukawa, 2019, Roth, 2014; Wei 2016	E5BBQ3_THEFU	56.7	240	98	3	34	267	62	301	6.74e-92	266
L_8	Streptomycetaceae	C	Prodigal_504|LOCUS_04760	Tfu_0883	T. fusca (strain YX), WSH03-11, Tfu_0883	EC 3.1.1.74	Chen, 2008; Su, 2013; Lykidis, 2007	Q47RJ6_THEFY	56.7	240	98	3	34	267	62	301	6.74e-92	266
L_8	Streptomycetaceae	C	Prodigal_504|LOCUS_04760	Thc_Cut1	T. cellulosilytica DSM44535, Thc_Cut1	EC 3.1.1.74	Herrero Acero, 2011, Ribitsch 2017	ADV92526.1	56.7	240	98	3	34	267	23	262	2.10e-92	266
L_8	Streptomycetaceae	C	Prodigal_504|LOCUS_04760	701	T. fusca, Enzyme 701		Erickson, 2022	WP_104613137.1	56.3	240	99	3	34	267	23	262	1.54e-91	264
L_8	Streptomycetaceae	C	Prodigal_504|LOCUS_04760	Est119	T. alba AHK119, Est119, est2	EC 3.1.1.1	Kitadokoro, 2019	F7IX06	56.3	240	99	3	34	267	61	300	6.06e-90	261
L_8	Streptomycetaceae	C	Prodigal_504|LOCUS_04760	TfH42_Cut1	T. fusca DSM44342, TfH42_Cut1	EC 3.1.1.74	Herrero Acero, 2011	E9LVI0_THEFU	56.3	240	99	3	34	267	23	262	1.54e-91	264
L_8	Streptomycetaceae	C	Prodigal_504|LOCUS_04760	Thc_Cut2	T. cellulosilytica DSM44535, Thc_Cut2	EC 3.1.1.74	Herrero Acero, 2011 Ribitsch 2017	ADV92571	56.3	240	99	3	34	267	23	262	2.25e-89	259
L_8	Streptomycetaceae	C	Prodigal_504|LOCUS_04760	Est1(Hydrolase4,Enzyme708)	T. alba (AHK119), Est1 (Hydrolase 4); Enzyme 708	EC 3.1.1.1	Hu, 2010; Erickson, 2022	BAI99230	55.8	240	100	3	34	267	57	296	4.65e-91	264
L_8	Streptomycetaceae	C	Prodigal_504|LOCUS_04760	Tcur_1278	T. curvata DSM43183, Tcur_1278	EC 3.1.1.74	Wei, 2014	D1A9G5	54.4	274	105	3	13	266	14	287	3.47e-94	272
L_14	Planctomycetaceae	C	Prodigal_3420|LOCUS_29840	202					52.9	34	16	0	118	151	35	68	7.67e-06	39.3
LW_4	Bacillaceae_C	C	Prodigal_1568|LOCUS_13120	102	Metagenome-derived. no obvious affiliation, Enzyme 102		Erickson, 2022	YNP6_02150	50.2	217	103	4	6	220	12	225	1.09e-60	194
LW_10	UBA6522 (e)	D	Prodigal_2165|LOCUS_19790	PpEst					50.8	179	88	0	25	203	23	201	8.56e-63	186
P_3	JAENVV01	E	Prodigal_1428|LOCUS_13920	202					63.2	38	14	0	118	155	32	69	2.89e-10	53.1
PW_1	70-9 (a)	E	Prodigal_1976|LOCUS_19450	202					62.9	35	13	0	114	148	34	68	1.18e-07	45.1
C_11	Pseudonocardiaceae	E	Prodigal_2518|LOCUS_22950	202					61.5	39	15	0	290	328	38	76	6.79e-08	46.6
PW_1	70-9 (a)	E	Prodigal_1497|LOCUS_14810	IS12					51.8	280	128	3	49	328	10	282	2.26e-81	244
P_7	SG8-41	E	Prodigal_359|LOCUS_03500	PpEst					50.8	193	93	1	7	199	11	201	2.89e-68	200
P_1	Halobacteriales (a)	E	Prodigal_932|LOCUS_09060	IS12					50.7	292	136	5	13	302	3	288	3.56e-91	268
P_6	RKSH01	F	Prodigal_1628|LOCUS_12810	PpEst					57.9	183	77	0	52	234	19	201	1.86e-74	218
P_9	Woeseiaceae (b)	F	Prodigal_31|LOCUS_00300	PpEst					51.6	186	90	0	10	195	16	201	9.07e-69	201
