# Supplementary material for: Lignocellulose-mediated selection of halophilic PET-degrading enzymes from mangrove soil
Source: Research Square preprint supplement (doi:10.21203/rs.3.rs-7600602/v1), 2025-09-30
Supplement: Supplementary file 4 [file 6a485e3ef07d55a60c4d0eb8.xlsx]

## Sheet: dbCAN Results
Gene ID	EC#	HMMER	dbCAN_sub	# of Tools	Bin Code	Taxonomy Code	Numeration	MAG Category	DIAMOND	HMMER_code	dbCAN_sub_code	Matched_code	Family	Lignocellulolytic
Prodigal_1680|LOCUS_16570	1.1.3.-:1	AA7(31-293)	AA7_e0	2	PW_19550.fna	70-9 (a)	48	E		AA7	AA7	AA7	AA	AA7
Prodigal_640|LOCUS_06370	1.1.3.-:1	AA7(20-287)	AA7_e0	2	PW_19550.fna	70-9 (a)	48	E		AA7	AA7	AA7	AA	AA7
Prodigal_203|LOCUS_02020	-	CE4(93-208)	CE4_e329	2	PW_19550.fna	70-9 (a)	48	E		CE4	CE4	CE4	CE	CE4
Prodigal_431|LOCUS_04300	-	CE4(55-197)	CE4_e274	2	PW_19550.fna	70-9 (a)	48	E		CE4	CE4	CE4	CE	CE4
Prodigal_1826|LOCUS_18020	-	GH141(43-571)	GH141_e21	3	PW_19550.fna	70-9 (a)	48	E	GH141	GH141	GH141	GH141	GH
Prodigal_2395|LOCUS_23430	3.2.1.28:6	GH15(242-600)	GH15_e22	3	PW_19550.fna	70-9 (a)	48	E	GH15	GH15	GH15	GH15	GH
Prodigal_1375|LOCUS_13620	-	GH23(148-244)	GH23_e712	2	PW_19550.fna	70-9 (a)	48	E		GH23	GH23	GH23	GH
Prodigal_1422|LOCUS_14080	-	GH23(328-432)	GH23_e426	3	PW_19550.fna	70-9 (a)	48	E	GH23	GH23	GH23	GH23	GH
Prodigal_1686|LOCUS_16630	-	GH23(215-313)	GH23_e712	3	PW_19550.fna	70-9 (a)	48	E	GH23	GH23	GH23	GH23	GH
Prodigal_618|LOCUS_06150	-	GH23(62-182)	GH23_e703	2	PW_19550.fna	70-9 (a)	48	E		GH23	GH23	GH23	GH
Prodigal_1824|LOCUS_18000	-	GH29(4-355)	GH29_e77	3	PW_19550.fna	70-9 (a)	48	E	GH29	GH29	GH29	GH29	GH
Prodigal_937|LOCUS_09330	-	GH3(112-327)	GH3_e126	2	PW_19550.fna	70-9 (a)	48	E		GH3	GH3	GH3	GH	GH3
Prodigal_1279|LOCUS_12700	-	GH39(57-378)	GH39_e133	2	PW_19550.fna	70-9 (a)	48	E		GH39	GH39	GH39	GH
Prodigal_1709|LOCUS_16850	-	GH39(74-265)	GH39_e12	2	PW_19550.fna	70-9 (a)	48	E		GH39	GH39	GH39	GH
Prodigal_922|LOCUS_09180	-	GH39(74-347)	GH39_e19	2	PW_19550.fna	70-9 (a)	48	E		GH39	GH39	GH39	GH
Prodigal_1823|LOCUS_17990	-	GH42(8-392)	GH42_e24	3	PW_19550.fna	70-9 (a)	48	E	GH42	GH42	GH42	GH42	GH	GH42
Prodigal_2370|LOCUS_23210	-	GH57(20-390)	GH57_e20	3	PW_19550.fna	70-9 (a)	48	E	GH57	GH57	GH57	GH57	GH
Prodigal_2293|LOCUS_22480	-	GH63(5-382)	GH63_e22	3	PW_19550.fna	70-9 (a)	48	E	GH63	GH63	GH63	GH63	GH
Prodigal_1433|LOCUS_12690	-	AA3_2(3-522)	AA3_e57	3	PW_metabat_PW.84.fa	70-9 (b)	67	F	AA3	AA3	AA3	AA3	AA	AA3
Prodigal_622|LOCUS_05750	1.1.3.-:1	AA7(32-303)	AA7_e0	2	PW_metabat_PW.84.fa	70-9 (b)	67	F		AA7	AA7	AA7	AA	AA7
Prodigal_1710|LOCUS_14870	-	CE4(45-166)	CE4_e300	2	PW_metabat_PW.84.fa	70-9 (b)	67	F		CE4	CE4	CE4	CE	CE4
Prodigal_278|LOCUS_02610	2.4.1.-:1|3.5.1.-:1	CE4(98-291)	CE4_e298	2	PW_metabat_PW.84.fa	70-9 (b)	67	F		CE4	CE4	CE4	CE	CE4
Prodigal_109|LOCUS_01050	-	GH109(2-142)	GH109_e2	2	PW_metabat_PW.84.fa	70-9 (b)	67	F		GH109	GH109	GH109	GH
Prodigal_1388|LOCUS_12320	-	GH23(54-179)	GH23_e703	2	PW_metabat_PW.84.fa	70-9 (b)	67	F		GH23	GH23	GH23	GH
Prodigal_923|LOCUS_08430	-	GH23(532-634)	GH23_e426	3	PW_metabat_PW.84.fa	70-9 (b)	67	F	GH23	GH23	GH23	GH23	GH
Prodigal_1654|LOCUS_14480	-	GH3(139-358)	GH3_e126	2	PW_metabat_PW.84.fa	70-9 (b)	67	F		GH3	GH3	GH3	GH	GH3
Prodigal_38|LOCUS_00380	-	GH31(221-670)	GH31_e24	3	PW_metabat_PW.84.fa	70-9 (b)	67	F	GH31	GH31	GH31	GH31	GH
Prodigal_1910|LOCUS_16240	-	GH39(79-397)	GH39_e133	2	PW_metabat_PW.84.fa	70-9 (b)	67	F		GH39	GH39	GH39	GH
Prodigal_2153|LOCUS_17890	-	GH39(72-246)	GH39_e19	2	PW_metabat_PW.84.fa	70-9 (b)	67	F		GH39	GH39	GH39	GH
Prodigal_59|LOCUS_00580	-	GH57(15-386)	GH57_e20	3	PW_metabat_PW.84.fa	70-9 (b)	67	F	GH57	GH57	GH57	GH57	GH
Prodigal_438|LOCUS_04080	-	GH63(29-430)	GH63_e23	3	PW_metabat_PW.84.fa	70-9 (b)	67	F	GH63	GH63	GH63	GH63	GH
Prodigal_1833|LOCUS_15750	-|2.4.1.18:14	CBM48(35-116)+GH13_9(183-480)	CBM48_e87+GH13_e200	3	LW_metabat_LW.136.fa	Alkalibacteraceae	8	A	CBM48	CBM48	CBM48	CBM48	CBM
Prodigal_1585|LOCUS_13950	3.1.1.72:1	CE4(236-358)	CE4_e178	2	LW_metabat_LW.136.fa	Alkalibacteraceae	8	A		CE4	CE4	CE4	CE	CE4
Prodigal_1619|LOCUS_14230	-|-|-|-|-	CE4(49-172)+CBM50(249-292)+CBM50(306-349)+CBM50(368-411)+CBM50(425-468)	CE4_e327+CBM50_e386+CBM50_e989+CBM50_e386+CBM50_e989	3	LW_metabat_LW.136.fa	Alkalibacteraceae	8	A	CBM50	CE4	CE4	CE4	CE	CE4
Prodigal_1861|LOCUS_15930	3.2.1.21:22|3.2.1.-:4|3.2.1.37:1|3.2.1.55:1|3.2.1.23:1|3.2.1.45:1	GH3(32-252)	GH3_e197	3	LW_metabat_LW.136.fa	Alkalibacteraceae	8	A	GH3	GH3	GH3	GH3	GH	GH3
Prodigal_754|LOCUS_07010	-	GH73(311-427)	GH73_e227	2	LW_metabat_LW.136.fa	Alkalibacteraceae	8	A		GH73	GH73	GH73	GH
Prodigal_270|LOCUS_02680	-	-	CBM50_e580	2	LW_metabat_LW.95.fa	Anaerolineaceae	73	F	CBM50		CBM50	CBM50	CBM
Prodigal_637|LOCUS_06270	-	-	CBM50_e580	2	LW_metabat_LW.95.fa	Anaerolineaceae	73	F	CBM50		CBM50	CBM50	CBM
Prodigal_640|LOCUS_06300	-	-	CBM50_e989	2	LW_metabat_LW.95.fa	Anaerolineaceae	73	F	CBM50		CBM50	CBM50	CBM
Prodigal_265|LOCUS_02630	-	CE1(125-343)	CE1_e22	2	LW_metabat_LW.95.fa	Anaerolineaceae	73	F		CE1	CE1	CE1	CE	CE1
Prodigal_347|LOCUS_03430	3.1.1.72:1|3.2.1.8:1	CE1(40-264)	CE1_e24	2	LW_metabat_LW.95.fa	Anaerolineaceae	73	F		CE1	CE1	CE1	CE	CE1
Prodigal_766|LOCUS_07520	-	CE14(14-121)	CE14_e51	2	LW_metabat_LW.95.fa	Anaerolineaceae	73	F		CE14	CE14	CE14	CE	CE14
Prodigal_1324|LOCUS_12940	-	CE4(148-275)	CE4_e274	2	LW_metabat_LW.95.fa	Anaerolineaceae	73	F		CE4	CE4	CE4	CE	CE4
Prodigal_1234|LOCUS_12090	-	GH1(7-421)	GH1_e74	3	LW_metabat_LW.95.fa	Anaerolineaceae	73	F	GH1	GH1	GH1	GH1	GH	GH1
Prodigal_1540|LOCUS_14920	3.2.1.21:71|3.2.1.-:11|3.2.1.38:3|3.2.1.23:2|3.2.1.74:1	GH1(5-447)	GH1_e113	3	LW_metabat_LW.95.fa	Anaerolineaceae	73	F	GH1	GH1	GH1	GH1	GH	GH1
Prodigal_299|LOCUS_02970	-	GH127(14-540)	GH127_e1	3	LW_metabat_LW.95.fa	Anaerolineaceae	73	F	GH127	GH127	GH127	GH127	GH
Prodigal_1167|LOCUS_11440	3.2.1.-:2	GH13_20(40-328)	GH13_e141	3	LW_metabat_LW.95.fa	Anaerolineaceae	73	F	GH13	GH13	GH13	GH13	GH
Prodigal_322|LOCUS_03180	3.2.1.20:1|3.2.1.10:1	GH13_23(30-365)	GH13_e182	3	LW_metabat_LW.95.fa	Anaerolineaceae	73	F	GH13	GH13	GH13	GH13	GH
Prodigal_68|LOCUS_00670	3.2.1.1:5|3.2.1.54:1	GH13_36(83-401)	GH13_e13	3	LW_metabat_LW.95.fa	Anaerolineaceae	73	F	GH13	GH13	GH13	GH13	GH
Prodigal_958|LOCUS_09380	2.4.1.4:1	GH13_4(120-514)	GH13_e129	3	LW_metabat_LW.95.fa	Anaerolineaceae	73	F	GH13	GH13	GH13	GH13	GH
Prodigal_1180|LOCUS_11570	-	GH23(99-200)	GH23_e367	2	LW_metabat_LW.95.fa	Anaerolineaceae	73	F		GH23	GH23	GH23	GH
Prodigal_120|LOCUS_01190	-	GH23(664-792)	GH23_e690	3	LW_metabat_LW.95.fa	Anaerolineaceae	73	F	GH23	GH23	GH23	GH23	GH
Prodigal_1183|LOCUS_11600	-	GH3(130-380)	GH3_e224	3	LW_metabat_LW.95.fa	Anaerolineaceae	73	F	GH3	GH3	GH3	GH3	GH	GH3
Prodigal_146|LOCUS_01450	3.2.1.37:92|3.2.1.55:39|3.2.1.21:1|3.2.1.6:1|3.2.1.73:1	GH3(43-284)	GH3_e0	3	LW_metabat_LW.95.fa	Anaerolineaceae	73	F	GH3	GH3	GH3	GH3	GH	GH3
Prodigal_1424|LOCUS_13870	-	GH32(21-292)	GH32_e83	3	LW_metabat_LW.95.fa	Anaerolineaceae	73	F	GH32	GH32	GH32	GH32	GH
Prodigal_493|LOCUS_04870	3.2.1.22:9	GH4(3-182)	GH4_e17	3	LW_metabat_LW.95.fa	Anaerolineaceae	73	F	GH4	GH4	GH4	GH4	GH
Prodigal_24|LOCUS_00230	-	GH57(70-534)	GH57_e18	3	LW_metabat_LW.95.fa	Anaerolineaceae	73	F	GH57	GH57	GH57	GH57	GH
Prodigal_271|LOCUS_02690	2.4.1.20:14|2.4.1.49:1	GH94(2-812)	GH94_e12	3	LW_metabat_LW.95.fa	Anaerolineaceae	73	F	GH94	GH94	GH94	GH94	GH	GH94
Prodigal_1493|LOCUS_14500	-	PL12(396-522)	PL12_e28	3	LW_metabat_LW.95.fa	Anaerolineaceae	73	F	PL12	PL12	PL12	PL12	PL	PL12
Prodigal_1195|LOCUS_10290	-	AA4(10-243)	AA4_e1	2	maxbin_LW.016.fasta	Bacillaceae_C	33	C		AA4	AA4	AA4	AA	AA4
Prodigal_1620|LOCUS_13520	2.4.1.18:57|2.4.1.18:14	CBM48(33-116)+GH13_9(185-485)	CBM48_e2+GH13_e200	3	maxbin_LW.016.fasta	Bacillaceae_C	33	C	CBM48	CBM48	CBM48	CBM48	CBM
Prodigal_1386|LOCUS_11780	3.2.1.-:3|3.2.1.-:3|3.2.1.-:3	GH18(146-408)	CBM50_e699+CBM50_e699+GH18_e157	3	maxbin_LW.016.fasta	Bacillaceae_C	33	C	CBM50	GH18	CBM50	CBM50	CBM
Prodigal_2334|LOCUS_18140	-	CBM50(30-71)	CBM50_e965	2	maxbin_LW.016.fasta	Bacillaceae_C	33	C		CBM50	CBM50	CBM50	CBM
Prodigal_189|LOCUS_01770	-	-	CBM50_e823	2	maxbin_LW.016.fasta	Bacillaceae_C	33	C	CBM50		CBM50	CBM50	CBM
Prodigal_51|LOCUS_00490	-	-	CBM50_e136	2	maxbin_LW.016.fasta	Bacillaceae_C	33	C	CBM50		CBM50	CBM50	CBM
Prodigal_660|LOCUS_05900	-|-	-	CBM50_e375+CBM50_e375	2	maxbin_LW.016.fasta	Bacillaceae_C	33	C	CBM50		CBM50	CBM50	CBM
Prodigal_929|LOCUS_08160	-	-	CBM50_e468	2	maxbin_LW.016.fasta	Bacillaceae_C	33	C	CBM50		CBM50	CBM50	CBM
Prodigal_296|LOCUS_02750	3.5.1.-:1	CE14(8-113)	CE14_e31	3	maxbin_LW.016.fasta	Bacillaceae_C	33	C	CE14	CE14	CE14	CE14	CE	CE14
Prodigal_810|LOCUS_07170	-	CE14(8-126)	CE14_e39	2	maxbin_LW.016.fasta	Bacillaceae_C	33	C		CE14	CE14	CE14	CE	CE14
Prodigal_1175|LOCUS_10120	-	CE4(35-138)	CE4_e50	3	maxbin_LW.016.fasta	Bacillaceae_C	33	C	CE4	CE4	CE4	CE4	CE	CE4
Prodigal_2183|LOCUS_17270	-	CE4(49-172)	CE4_e14	3	maxbin_LW.016.fasta	Bacillaceae_C	33	C	CE4	CE4	CE4	CE4	CE	CE4
Prodigal_506|LOCUS_04600	-	CE4(152-276)	CE4_e20	3	maxbin_LW.016.fasta	Bacillaceae_C	33	C	CE4	CE4	CE4	CE4	CE	CE4
Prodigal_978|LOCUS_08550	3.5.1.104:5	CE4(61-186)	CE4_e23	3	maxbin_LW.016.fasta	Bacillaceae_C	33	C	CE4	CE4	CE4	CE4	CE	CE4
Prodigal_1361|LOCUS_11590	3.2.1.1:1|2.4.1.161:1	GH13_31(27-380)	GH13_e119	3	maxbin_LW.016.fasta	Bacillaceae_C	33	C	GH13	GH13	GH13	GH13	GH
Prodigal_1451|LOCUS_12270	3.2.1.93:2	GH13_29(27-375)	GH13_e1	3	maxbin_LW.016.fasta	Bacillaceae_C	33	C	GH13	GH13	GH13	GH13	GH
Prodigal_388|LOCUS_03580	5.4.99.11:5|3.2.1.20:4|3.2.1.10:1|3.2.1.-:1|3.2.1.70:1	GH13_31(27-377)	GH13_e122	3	maxbin_LW.016.fasta	Bacillaceae_C	33	C	GH13	GH13	GH13	GH13	GH
Prodigal_601|LOCUS_05400	-	GH170(1-349)	GH170_e17	3	maxbin_LW.016.fasta	Bacillaceae_C	33	C	GH170	GH170	GH170	GH170	GH
Prodigal_2439|LOCUS_18680	3.2.1.92:6	GH171(57-419)	GH171_e0	3	maxbin_LW.016.fasta	Bacillaceae_C	33	C	GH171	GH171	GH171	GH171	GH
Prodigal_1302|LOCUS_11160	-	GH23(53-194)	GH23_e188	3	maxbin_LW.016.fasta	Bacillaceae_C	33	C	GH23	GH23	GH23	GH23	GH
Prodigal_234|LOCUS_02180	3.2.1.17:12|4.2.2.n1:6	GH23(155-256)	GH23_e335	2	maxbin_LW.016.fasta	Bacillaceae_C	33	C		GH23	GH23	GH23	GH
Prodigal_1124|LOCUS_09710	3.2.1.52:4	GH3(132-356)	GH3_e199	3	maxbin_LW.016.fasta	Bacillaceae_C	33	C	GH3	GH3	GH3	GH3	GH	GH3
Prodigal_164|LOCUS_01530	3.2.1.23:10	GH42(13-380)	GH42_e34	3	maxbin_LW.016.fasta	Bacillaceae_C	33	C	GH42	GH42	GH42	GH42	GH	GH42
Prodigal_389|LOCUS_03590	2.4.1.8:9	GH65(322-690)	GH65_e0	3	maxbin_LW.016.fasta	Bacillaceae_C	33	C	GH65	GH65	GH65	GH65	GH
Prodigal_1619|LOCUS_13470	-	CBM9(54-232)	CBM9_e3	3	C_metabat_C.74.fa	Balneolaceae (a)	43	E	CBM0	CBM9	CBM9	CBM9	CBM	CBM9
Prodigal_1260|LOCUS_10740	-	CE14(7-112)	CE14_e15	2	C_metabat_C.74.fa	Balneolaceae (a)	43	E		CE14	CE14	CE14	CE	CE14
Prodigal_1669|LOCUS_13790	-	CE14(4-122)	CE14_e56	2	C_metabat_C.74.fa	Balneolaceae (a)	43	E		CE14	CE14	CE14	CE	CE14
Prodigal_647|LOCUS_05740	-	CE3(26-200)	CE3_e25	2	C_metabat_C.74.fa	Balneolaceae (a)	43	E		CE3	CE3	CE3	CE	CE3
Prodigal_2053|LOCUS_16580	-	GH127(299-572)	GH127_e1	3	C_metabat_C.74.fa	Balneolaceae (a)	43	E	CBM66	GH127	GH127	GH127	GH
Prodigal_1899|LOCUS_15450	-	GH13(68-347)	GH13_e158	3	C_metabat_C.74.fa	Balneolaceae (a)	43	E	GH13	GH13	GH13	GH13	GH
Prodigal_2253|LOCUS_17970	3.2.1.-:1|3.2.1.54:1	GH13_20(110-466)	GH13_e243	3	C_metabat_C.74.fa	Balneolaceae (a)	43	E	GH13	GH13	GH13	GH13	GH
Prodigal_632|LOCUS_05600	-	GH13_18(105-444)	GH13_e237	3	C_metabat_C.74.fa	Balneolaceae (a)	43	E	GH13	GH13	GH13	GH13	GH
Prodigal_1615|LOCUS_13450	-	GH130_3(43-315)	GH130_e35	2	C_metabat_C.74.fa	Balneolaceae (a)	43	E		GH130	GH130	GH130	GH
Prodigal_663|LOCUS_05860	3.2.1.92:6	GH171(50-404)	GH171_e0	3	C_metabat_C.74.fa	Balneolaceae (a)	43	E	GH171	GH171	GH171	GH171	GH
Prodigal_1512|LOCUS_12700	3.2.1.14:1|3.2.1.-:1	GH18(29-345)	GH18_e3	2	C_metabat_C.74.fa	Balneolaceae (a)	43	E		GH18	GH18	GH18	GH
Prodigal_1207|LOCUS_10330	3.2.1.52:18|3.2.1.-:1	GH20(167-515)	GH20_e12	3	C_metabat_C.74.fa	Balneolaceae (a)	43	E	GH20	GH20	GH20	GH20	GH
Prodigal_507|LOCUS_04530	-|3.2.1.14:1	GH23(219-352)	GH23_e450+CBM50_e623	3	C_metabat_C.74.fa	Balneolaceae (a)	43	E	CBM50	GH23	GH23	GH23	GH
Prodigal_1208|LOCUS_10340	3.2.1.111:8|3.2.1.51:3|-	GH29(25-330)	GH29_e30+CBM32_e126	3	C_metabat_C.74.fa	Balneolaceae (a)	43	E	GH29	GH29	GH29	GH29	GH
Prodigal_304|LOCUS_02750	-	GH3(101-324)	GH3_e195	3	C_metabat_C.74.fa	Balneolaceae (a)	43	E	GH3	GH3	GH3	GH3	GH	GH3
Prodigal_1363|LOCUS_11570	3.2.1.55:3|3.2.1.55:3	GH43_19(77-306)+GH43_34(412-699)	GH43_e159+GH43_e159	3	C_metabat_C.74.fa	Balneolaceae (a)	43	E	GH43	GH43	GH43	GH43	GH	GH43
Prodigal_2175|LOCUS_17450	3.2.1.55:27	GH51_1(37-523)	GH51_e19	3	C_metabat_C.74.fa	Balneolaceae (a)	43	E	GH51	GH51	GH51	GH51	GH	GH51
Prodigal_1362|LOCUS_11560	-	GH97(26-654)	GH97_e14	3	C_metabat_C.74.fa	Balneolaceae (a)	43	E	GH97	GH97	GH97	GH97	GH
Prodigal_1698|LOCUS_13430	-	CBM9(91-289)	CBM9_e14	2	LW_metabat_LW.149.fa	Balneolaceae (b)	9	A		CBM9	CBM9	CBM9	CBM	CBM9
Prodigal_933|LOCUS_08050	-	CE1(50-268)	CE1_e22	3	LW_metabat_LW.149.fa	Balneolaceae (b)	9	A	CBM48	CE1	CE1	CE1	CE	CE1
Prodigal_660|LOCUS_05840	-	CE14(6-111)	CE14_e10	2	LW_metabat_LW.149.fa	Balneolaceae (b)	9	A		CE14	CE14	CE14	CE	CE14
Prodigal_520|LOCUS_04700	3.1.1.-:1	CE15(77-398)	CE15_e21	3	LW_metabat_LW.149.fa	Balneolaceae (b)	9	A	CE15	CE15	CE15	CE15	CE	CE15
Prodigal_839|LOCUS_07320	-	CE15(58-420)	CE15_e13	3	LW_metabat_LW.149.fa	Balneolaceae (b)	9	A	CE15	CE15	CE15	CE15	CE	CE15
Prodigal_1780|LOCUS_13920	3.2.1.-:1	GH10(89-435)	GH10_e125	3	LW_metabat_LW.149.fa	Balneolaceae (b)	9	A	GH10	GH10	GH10	GH10	GH	GH10
Prodigal_809|LOCUS_07070	3.2.1.8:6	GH10(58-338)	GH10_e0	3	LW_metabat_LW.149.fa	Balneolaceae (b)	9	A	GH10	GH10	GH10	GH10	GH	GH10
Prodigal_832|LOCUS_07270	3.2.1.8:1	GH10(65-406)	GH10_e124	3	LW_metabat_LW.149.fa	Balneolaceae (b)	9	A	GH10	GH10	GH10	GH10	GH	GH10
Prodigal_1248|LOCUS_10410	-	GH103(74-237)	GH103_e29	2	LW_metabat_LW.149.fa	Balneolaceae (b)	9	A		GH103	GH103	GH103	GH
Prodigal_1476|LOCUS_12060	-	GH109(3-191)	GH109_e7	2	LW_metabat_LW.149.fa	Balneolaceae (b)	9	A		GH109	GH109	GH109	GH
Prodigal_951|LOCUS_08180	-	GH109(3-372)	GH109_e7	2	LW_metabat_LW.149.fa	Balneolaceae (b)	9	A		GH109	GH109	GH109	GH
Prodigal_240|LOCUS_02200	-	GH13_14(171-511)	GH13_e65	3	LW_metabat_LW.149.fa	Balneolaceae (b)	9	A	CBM48	GH13	GH13	GH13	GH
Prodigal_53|LOCUS_00490	-	GH13_18(89-428)	GH13_e237	3	LW_metabat_LW.149.fa	Balneolaceae (b)	9	A	GH13	GH13	GH13	GH13	GH
Prodigal_604|LOCUS_05380	3.2.1.23:2	GH2(49-624)	GH2_e127	3	LW_metabat_LW.149.fa	Balneolaceae (b)	9	A	GH2	GH2	GH2	GH2	GH	GH2
Prodigal_204|LOCUS_01880	-	GH23(336-485)	GH23_e951	3	LW_metabat_LW.149.fa	Balneolaceae (b)	9	A	GH23	GH23	GH23	GH23	GH
Prodigal_1514|LOCUS_12320	-	GH31(250-671)	GH31_e51	3	LW_metabat_LW.149.fa	Balneolaceae (b)	9	A	GH31	GH31	GH31	GH31	GH
Prodigal_5|LOCUS_00050	3.2.1.55:27	GH51_1(30-512)	GH51_e19	3	LW_metabat_LW.149.fa	Balneolaceae (b)	9	A	GH51	GH51	GH51	GH51	GH	GH51
Prodigal_1333|LOCUS_10970	-	GH53(49-359)	GH53_e24	3	LW_metabat_LW.149.fa	Balneolaceae (b)	9	A	GH53	GH53	GH53	GH53	GH	GH53
Prodigal_1569|LOCUS_12650	-	GH53(51-400)	GH53_e25	3	LW_metabat_LW.149.fa	Balneolaceae (b)	9	A	GH53	GH53	GH53	GH53	GH	GH53
Prodigal_974|LOCUS_08350	2.4.1.25:21	GH77(11-487)	GH77_e26	3	LW_metabat_LW.149.fa	Balneolaceae (b)	9	A	GH77	GH77	GH77	GH77	GH
Prodigal_1354|LOCUS_11100	3.2.1.-:3	GH88(79-396)	GH88_e11	2	LW_metabat_LW.149.fa	Balneolaceae (b)	9	A		GH88	GH88	GH88	GH
Prodigal_620|LOCUS_05510	3.2.1.-:3|3.2.1.63:2	GH95(27-761)	GH95_e1	3	LW_metabat_LW.149.fa	Balneolaceae (b)	9	A	GH95	GH95	GH95	GH95	GH
Prodigal_547|LOCUS_04920	-	PL12(280-411)	PL12_e38	3	LW_metabat_LW.149.fa	Balneolaceae (b)	9	A	PL0	PL12	PL12	PL12	PL	PL12
Prodigal_1355|LOCUS_11110	-	PL38(94-363)	PL38_e14	2	LW_metabat_LW.149.fa	Balneolaceae (b)	9	A		PL38	PL38	PL38	PL
Prodigal_2545|LOCUS_20640	1.10.3.2:77	AA1(38-441)	AA1_e33	2	L_metabat_L.59.fa	CECT-8803	44	E		AA1	AA1	AA1	AA	AA1
Prodigal_1789|LOCUS_15290	-	AA3_2(11-537)	AA3_e57	3	L_metabat_L.59.fa	CECT-8803	44	E	AA3	AA3	AA3	AA3	AA	AA3
Prodigal_1805|LOCUS_15430	-	AA3_2(5-537)	AA3_e57	3	L_metabat_L.59.fa	CECT-8803	44	E	AA3	AA3	AA3	AA3	AA	AA3
Prodigal_1991|LOCUS_16830	1.1.3.-:1	AA7(39-471)	AA7_e0	2	L_metabat_L.59.fa	CECT-8803	44	E		AA7	AA7	AA7	AA	AA7
Prodigal_789|LOCUS_07070	-	CE14(7-119)	CE14_e39	2	L_metabat_L.59.fa	CECT-8803	44	E		CE14	CE14	CE14	CE	CE14
Prodigal_576|LOCUS_05220	-	GH103(54-362)	GH103_e33	3	L_metabat_L.59.fa	CECT-8803	44	E	GH103	GH103	GH103	GH103	GH
Prodigal_683|LOCUS_06180	-	GH15(219-582)	GH15_e57	3	L_metabat_L.59.fa	CECT-8803	44	E	GH15	GH15	GH15	GH15	GH
Prodigal_751|LOCUS_06730	-	GH23(514-649)	GH23_e341	3	L_metabat_L.59.fa	CECT-8803	44	E	GH23	GH23	GH23	GH23	GH
Prodigal_1152|LOCUS_10180	-	GH3(60-281)	GH3_e228	3	L_metabat_L.59.fa	CECT-8803	44	E	GH3	GH3	GH3	GH3	GH	GH3
Prodigal_2402|LOCUS_23180	1.10.3.2:4|1.10.3.-:1	AA1(73-473)	AA1_e46	2	L_metabat_L.45.fa	Cellulomonadaceae	30	C		AA1	AA1	AA1	AA	AA1
Prodigal_2281|LOCUS_22060	1.14.99.53:1|-	AA10(50-188)	AA10_e36+CBM5_e51	2	L_metabat_L.45.fa	Cellulomonadaceae	30	C		AA10	AA10	AA10	AA	AA10
Prodigal_3833|LOCUS_35610	1.14.99.54:4|1.14.99.56:4|1.14.99.54:1|1.14.99.56:1	AA10(41-224)+CBM2(275-354)	AA10_e50+CBM2_e17	3	L_metabat_L.45.fa	Cellulomonadaceae	30	C	AA10	AA10	AA10	AA10	AA	AA10
Prodigal_789|LOCUS_07780	3.2.1.78:1|3.2.1.4:2	AA10(26-213)+CBM2(250-346)	AA10_e9+CBM2_e30	2	L_metabat_L.45.fa	Cellulomonadaceae	30	C		AA10	AA10	AA10	AA	AA10
Prodigal_1356|LOCUS_13270	-	AA3_2(3-522)	AA3_e4	3	L_metabat_L.45.fa	Cellulomonadaceae	30	C	AA3	AA3	AA3	AA3	AA	AA3
Prodigal_2463|LOCUS_23740	-	AA3_2(82-591)	AA3_e57	3	L_metabat_L.45.fa	Cellulomonadaceae	30	C	AA3	AA3	AA3	AA3	AA	AA3
Prodigal_3452|LOCUS_32520	-	AA5(244-812)	AA5_e0	3	L_metabat_L.45.fa	Cellulomonadaceae	30	C	AA5	AA5	AA5	AA5	AA	AA5
Prodigal_3295|LOCUS_31260	1.1.3.-:1	AA7(346-697)	AA7_e0	2	L_metabat_L.45.fa	Cellulomonadaceae	30	C		AA7	AA7	AA7	AA	AA7
Prodigal_791|LOCUS_07800	1.1.3.-:2	AA7(50-400)	AA7_e5	2	L_metabat_L.45.fa	Cellulomonadaceae	30	C		AA7	AA7	AA7	AA	AA7
Prodigal_243|LOCUS_02420	-|3.2.1.14:6	GH18(139-373)	CBM12_e3+GH18_e325	3	L_metabat_L.45.fa	Cellulomonadaceae	30	C	CBM12	GH18	CBM12	CBM12	CBM
Prodigal_1187|LOCUS_11640	-	CBM13(94-218)	CBM13_e341	2	L_metabat_L.45.fa	Cellulomonadaceae	30	C		CBM13	CBM13	CBM13	CBM	CBM13
Prodigal_1852|LOCUS_18010	3.2.1.145:2|4.2.2.23:15|4.2.2.24:5	CBM13(40-131)+PL11(193-766)	CBM13_e360+PL11_e0	3	L_metabat_L.45.fa	Cellulomonadaceae	30	C	CBM2	CBM13	CBM13	CBM13	CBM	CBM13
Prodigal_1905|LOCUS_18500	3.2.1.145:2|-	CBM13(47-138)+GH43_26(190-475)	CBM13_e360+GH43_e78	3	L_metabat_L.45.fa	Cellulomonadaceae	30	C	CBM13	CBM13	CBM13	CBM13	CBM	CBM13
Prodigal_2057|LOCUS_19920	-	CBM13(409-523)	CBM13_e200	3	L_metabat_L.45.fa	Cellulomonadaceae	30	C	CBM13	CBM13	CBM13	CBM13	CBM	CBM13
Prodigal_2422|LOCUS_23360	3.2.1.145:2|3.2.1.55:25|3.2.1.-:1	CBM13(49-183)+GH62(196-465)	CBM13_e360+GH62_e0	3	L_metabat_L.45.fa	Cellulomonadaceae	30	C	CBM13	CBM13	CBM13	CBM13	CBM	CBM13
Prodigal_2760|LOCUS_26490	3.2.1.145:2|3.2.1.99:1	CBM13(82-173)+GH43_5(240-515)	CBM13_e360+GH43_e109	3	L_metabat_L.45.fa	Cellulomonadaceae	30	C	CBM13	CBM13	CBM13	CBM13	CBM	CBM13
Prodigal_614|LOCUS_06080	3.2.1.8:18|3.2.1.55:2	GH5_5(86-306)+CBM13(322-450)+CBM13(417-495)	CBM13_e338	3	L_metabat_L.45.fa	Cellulomonadaceae	30	C	CBM13	GH5	CBM13	CBM13	CBM	CBM13
Prodigal_242|LOCUS_02410	3.2.1.4:3|-	CBM2(27-125)+CE15(184-503)	CBM2_e93+CE15_e2	3	L_metabat_L.45.fa	Cellulomonadaceae	30	C	CBM2	CBM2	CBM2	CBM2	CBM	CBM2
Prodigal_2598|LOCUS_25020	3.2.1.78:1|-	CBM2(38-135)+CE3(174-372)	CBM2_e103+CE3_e26	2	L_metabat_L.45.fa	Cellulomonadaceae	30	C		CBM2	CBM2	CBM2	CBM	CBM2
Prodigal_362|LOCUS_03610	-	CBM2(2-86)	CBM2_e10	2	L_metabat_L.45.fa	Cellulomonadaceae	30	C		CBM2	CBM2	CBM2	CBM	CBM2
Prodigal_983|LOCUS_09670	3.2.1.4:3|3.2.1.4:5	CBM2(43-140)+GH6(183-429)	CBM2_e93+GH6_e10	3	L_metabat_L.45.fa	Cellulomonadaceae	30	C	CBM2	CBM2	CBM2	CBM2	CBM	CBM2
Prodigal_2059|LOCUS_19930	3.2.1.8:2|3.2.1.8:1|3.2.1.8:2|3.2.1.8:2|3.2.1.8:2|3.2.1.8:2	CBM22(53-176)+CE4(226-346)+CBM22(422-554)+GH10(587-922)+CBM9(1090-1263)	CBM22_e17+CE4_e88+CBM22_e17+GH10_e137+CBM9_e2+CBM9_e2	3	L_metabat_L.45.fa	Cellulomonadaceae	30	C	CBM22	CBM22	CBM22	CBM22	CBM	CBM22
Prodigal_1739|LOCUS_16910	-	CBM32(45-158)	CBM32_e160	3	L_metabat_L.45.fa	Cellulomonadaceae	30	C	CBM32	CBM32	CBM32	CBM32	CBM	CBM32
Prodigal_1740|LOCUS_16920	-|-|-	CBM32(52-164)+GH158(216-372)+CBM32(628-741)	CBM32_e68+GH158_e1+CBM32_e118	3	L_metabat_L.45.fa	Cellulomonadaceae	30	C	CBM32	CBM32	CBM32	CBM32	CBM	CBM32
Prodigal_1743|LOCUS_16950	-|-|-	CBM32(42-154)+CBM32(179-300)+GH16_3(327-560)	CBM32_e160+CBM32_e160+GH16_e239	3	L_metabat_L.45.fa	Cellulomonadaceae	30	C	CBM32	CBM32	CBM32	CBM32	CBM	CBM32
Prodigal_2479|LOCUS_23900	3.2.1.-:10|3.2.1.-:25|3.2.1.39:2|3.2.1.58:2	CBM32(65-177)+GH55_1(425-703)	CBM32_e159+GH55_e0	3	L_metabat_L.45.fa	Cellulomonadaceae	30	C	CBM32	CBM32	CBM32	CBM32	CBM	CBM32
Prodigal_642|LOCUS_06360	-	CBM32(59-169)	CBM32_e184	2	L_metabat_L.45.fa	Cellulomonadaceae	30	C		CBM32	CBM32	CBM32	CBM	CBM32
Prodigal_677|LOCUS_06690	-	CBM35(688-812)	CBM35_e46	3	L_metabat_L.45.fa	Cellulomonadaceae	30	C	CBM35	CBM35	CBM35	CBM35	CBM	CBM35
Prodigal_1529|LOCUS_14920	3.2.1.68:75|2.4.1.25:4|3.2.1.-:1|3.2.1.68:15|3.2.1.-:1	CBM48(14-102)+GH13_11(187-540)	CBM48_e3+GH13_e48	3	L_metabat_L.45.fa	Cellulomonadaceae	30	C	CBM48	CBM48	CBM48	CBM48	CBM
Prodigal_2250|LOCUS_21770	2.4.1.18:57|2.4.1.18:14	CBM48(148-236)+GH13_9(298-597)	CBM48_e2+GH13_e200	3	L_metabat_L.45.fa	Cellulomonadaceae	30	C	CBM48	CBM48	CBM48	CBM48	CBM
Prodigal_692|LOCUS_06840	3.2.1.68:75|2.4.1.25:4|3.2.1.-:1|3.2.1.68:15|3.2.1.-:1	CBM48(75-167)+GH13_11(255-634)	CBM48_e3+GH13_e48	3	L_metabat_L.45.fa	Cellulomonadaceae	30	C	CBM48	CBM48	CBM48	CBM48	CBM
Prodigal_3049|LOCUS_29100	-|3.2.1.14:18|3.2.1.-:1	GH18(166-622)	CBM5_e27+GH18_e224	3	L_metabat_L.45.fa	Cellulomonadaceae	30	C	CBM5	GH18	CBM5	CBM5	CBM	CBM5
Prodigal_3392|LOCUS_32070	-|3.2.1.14:16	GH19(107-309)	CBM5_e64+GH19_e143	3	L_metabat_L.45.fa	Cellulomonadaceae	30	C	CBM5	GH19	CBM5	CBM5	CBM	CBM5
Prodigal_1679|LOCUS_16330	-|-	CBM57(1335-1473)+CBM57(1910-2054)	CBM57_e10+CBM57_e10	3	L_metabat_L.45.fa	Cellulomonadaceae	30	C	CBM57	CBM57	CBM57	CBM57	CBM
Prodigal_3344|LOCUS_31660	-|-	CBM61(46-184)+GH53(193-537)	CBM61_e14+GH53_e27	3	L_metabat_L.45.fa	Cellulomonadaceae	30	C	CBM61	CBM61	CBM61	CBM61	CBM
Prodigal_1788|LOCUS_17400	-|-	CE1(62-190)+CBM2(324-412)	CE1_e37+CBM2_e34	3	L_metabat_L.45.fa	Cellulomonadaceae	30	C	CBM2	CE1	CE1	CE1	CE	CE1
Prodigal_363|LOCUS_03620	-	CE1(39-196)	CE1_e39	2	L_metabat_L.45.fa	Cellulomonadaceae	30	C		CE1	CE1	CE1	CE	CE1
Prodigal_3120|LOCUS_29740	-	CE14(16-175)	CE14_e4	2	L_metabat_L.45.fa	Cellulomonadaceae	30	C		CE14	CE14	CE14	CE	CE14
Prodigal_3177|LOCUS_30230	3.5.1.115:3	CE14(12-151)	CE14_e1	3	L_metabat_L.45.fa	Cellulomonadaceae	30	C	CE14	CE14	CE14	CE14	CE	CE14
Prodigal_825|LOCUS_08130	-	CE14(145-247)	CE14_e40	2	L_metabat_L.45.fa	Cellulomonadaceae	30	C		CE14	CE14	CE14	CE	CE14
Prodigal_1793|LOCUS_17450	-	CE4(248-368)	CE4_e104	3	L_metabat_L.45.fa	Cellulomonadaceae	30	C	CE4	CE4	CE4	CE4	CE	CE4
Prodigal_3012|LOCUS_28790	3.2.1.8:3|3.1.1.72:2|3.1.1.6:1|3.2.1.8:22|3.1.1.72:2|3.1.1.6:1	CE4(48-166)	CE4_e58+CBM2_e124	2	L_metabat_L.45.fa	Cellulomonadaceae	30	C		CE4	CE4	CE4	CE	CE4
Prodigal_1802|LOCUS_17530	-	CE7(4-331)	CE7_e32	3	L_metabat_L.45.fa	Cellulomonadaceae	30	C	CE7	CE7	CE7	CE7	CE	CE7
Prodigal_83|LOCUS_00830	-	CE9(11-412)	CE9_e100	3	L_metabat_L.45.fa	Cellulomonadaceae	30	C	CE9	CE9	CE9	CE9	CE	CE9
Prodigal_1617|LOCUS_15740	3.2.1.21:71|3.2.1.-:11|3.2.1.38:3|3.2.1.23:2|3.2.1.74:1	GH1(44-501)	GH1_e113	3	L_metabat_L.45.fa	Cellulomonadaceae	30	C	GH1	GH1	GH1	GH1	GH	GH1
Prodigal_3404|LOCUS_32160	3.2.1.21:71|3.2.1.-:11|3.2.1.38:3|3.2.1.23:2|3.2.1.74:1	GH1(8-469)	GH1_e113	3	L_metabat_L.45.fa	Cellulomonadaceae	30	C	GH1	GH1	GH1	GH1	GH	GH1
Prodigal_1164|LOCUS_11430	-	GH10(83-376)	GH10_e42	3	L_metabat_L.45.fa	Cellulomonadaceae	30	C	GH10	GH10	GH10	GH10	GH	GH10
Prodigal_2611|LOCUS_25140	3.2.1.8:33|1.14.99.54:1|1.14.99.56:1	GH10(43-338)+CBM2(372-450)	GH10_e90+CBM2_e17	3	L_metabat_L.45.fa	Cellulomonadaceae	30	C	CBM2	GH10	GH10	GH10	GH	GH10
Prodigal_200|LOCUS_01990	3.2.1.8:104|3.2.1.39:5|3.2.1.14:1	GH11(52-228)+CBM13(251-370)	GH11_e15+CBM13_e183	2	L_metabat_L.45.fa	Cellulomonadaceae	30	C		GH11	GH11	GH11	GH	GH11
Prodigal_357|LOCUS_03560	-	GH114(70-238)	GH114_e3	2	L_metabat_L.45.fa	Cellulomonadaceae	30	C		GH114	GH114	GH114	GH
Prodigal_1604|LOCUS_15620	-	GH127(63-597)	GH127_e11	3	L_metabat_L.45.fa	Cellulomonadaceae	30	C	GH127	GH127	GH127	GH127	GH
Prodigal_132|LOCUS_01310	3.2.1.20:2	GH13_30(43-413)	GH13_e234	3	L_metabat_L.45.fa	Cellulomonadaceae	30	C	GH13	GH13	GH13	GH13	GH
Prodigal_1397|LOCUS_13670	3.2.1.20:2	GH13_30(32-392)	GH13_e234	3	L_metabat_L.45.fa	Cellulomonadaceae	30	C	GH13	GH13	GH13	GH13	GH
Prodigal_2845|LOCUS_27270	3.2.1.41:10|3.2.1.1:3|3.2.1.68:1|3.2.1.41:28|3.2.1.68:4	GH13_13(234-583)	GH13_e183+CBM48_e30	3	L_metabat_L.45.fa	Cellulomonadaceae	30	C	CBM48	GH13	GH13	GH13	GH
Prodigal_3334|LOCUS_31580	-	GH13_3(251-470)	GH13_e41	3	L_metabat_L.45.fa	Cellulomonadaceae	30	C	GH13	GH13	GH13	GH13	GH
Prodigal_3335|LOCUS_31590	5.4.99.16:7	GH13_16(88-442)	GH13_e0	3	L_metabat_L.45.fa	Cellulomonadaceae	30	C	GH13	GH13	GH13	GH13	GH
Prodigal_779|LOCUS_07680	3.2.1.1:5|3.2.1.116:1|3.2.1.1:7|3.2.1.116:1	GH13_32(70-328)+CBM20(483-567)	GH13_e240+CBM20_e48	3	L_metabat_L.45.fa	Cellulomonadaceae	30	C	CBM20	GH13	GH13	GH13	GH
Prodigal_780|LOCUS_07690	3.2.1.20:2	GH13_30(49-429)	GH13_e234	3	L_metabat_L.45.fa	Cellulomonadaceae	30	C	GH13	GH13	GH13	GH13	GH
Prodigal_3503|LOCUS_32950	-	GH130_11(18-353)	GH130_e8	3	L_metabat_L.45.fa	Cellulomonadaceae	30	C	GH130	GH130	GH130	GH130	GH
Prodigal_1363|LOCUS_13340	3.2.1.3:1	GH15(224-586)	GH15_e59	3	L_metabat_L.45.fa	Cellulomonadaceae	30	C	GH15	GH15	GH15	GH15	GH
Prodigal_2129|LOCUS_20610	3.2.1.28:6	GH15(286-645)	GH15_e22	3	L_metabat_L.45.fa	Cellulomonadaceae	30	C	GH15	GH15	GH15	GH15	GH
Prodigal_2006|LOCUS_19450	-	GH154(18-365)	GH154_e3	3	L_metabat_L.45.fa	Cellulomonadaceae	30	C	GH154	GH154	GH154	GH154	GH
Prodigal_1422|LOCUS_13900	3.2.1.39:2|3.2.1.39:2	GH16_3(42-299)+CBM6(325-453)	GH16_e303+CBM6_e39	3	L_metabat_L.45.fa	Cellulomonadaceae	30	C	CBM6	GH16	GH16	GH16	GH	GH16
Prodigal_1609|LOCUS_15670	3.2.1.39:7|3.2.1.39:5|3.2.1.14:1	GH16_3(52-282)+CBM13(296-414)	GH16_e103+CBM13_e183	3	L_metabat_L.45.fa	Cellulomonadaceae	30	C	CBM13	GH16	GH16	GH16	GH	GH16
Prodigal_2758|LOCUS_26470	-|3.2.1.14:2|3.2.1.14:2	GH18(50-451)	GH18_e427+CBM5_e22+CBM5_e22	3	L_metabat_L.45.fa	Cellulomonadaceae	30	C	CBM5	GH18	GH18	GH18	GH
Prodigal_2245|LOCUS_21720	3.2.1.25:5	GH2(9-767)	GH2_e24	3	L_metabat_L.45.fa	Cellulomonadaceae	30	C	GH2	GH2	GH2	GH2	GH	GH2
Prodigal_3490|LOCUS_32830	3.2.1.52:6|3.2.1.52:6	GH20(142-515)	GH20_e114+GH20_e114	3	L_metabat_L.45.fa	Cellulomonadaceae	30	C	GH20	GH20	GH20	GH20	GH
Prodigal_1219|LOCUS_11960	-	GH23(70-205)	GH23_e999	2	L_metabat_L.45.fa	Cellulomonadaceae	30	C		GH23	GH23	GH23	GH
Prodigal_1811|LOCUS_17620	-	-	GH23_e331	2	L_metabat_L.45.fa	Cellulomonadaceae	30	C	GH23		GH23	GH23	GH
Prodigal_3543|LOCUS_33280	3.2.1.51:1	GH29(6-335)	GH29_e2	3	L_metabat_L.45.fa	Cellulomonadaceae	30	C	GH29	GH29	GH29	GH29	GH
Prodigal_1732|LOCUS_16840	3.2.1.21:6	GH3(74-300)	GH3_e91	3	L_metabat_L.45.fa	Cellulomonadaceae	30	C	GH3	GH3	GH3	GH3	GH	GH3
Prodigal_2686|LOCUS_25820	3.2.1.21:22|3.2.1.-:4|3.2.1.37:1|3.2.1.55:1|3.2.1.23:1|3.2.1.45:1	GH3(36-248)	GH3_e197	3	L_metabat_L.45.fa	Cellulomonadaceae	30	C	GH3	GH3	GH3	GH3	GH	GH3
Prodigal_2692|LOCUS_25880	3.2.1.37:4	GH3(100-322)	GH3_e50	3	L_metabat_L.45.fa	Cellulomonadaceae	30	C	GH3	GH3	GH3	GH3	GH	GH3
Prodigal_85|LOCUS_00850	3.2.1.120:1|3.2.1.74:1	GH3(42-270)	GH3_e179	3	L_metabat_L.45.fa	Cellulomonadaceae	30	C	GH3	GH3	GH3	GH3	GH	GH3
Prodigal_94|LOCUS_00940	3.2.1.177:12	GH31_3(241-680)	GH31_e31	3	L_metabat_L.45.fa	Cellulomonadaceae	30	C	GH31	GH31	GH31	GH31	GH
Prodigal_1846|LOCUS_17960	3.2.1.22:8	GH36(15-669)	GH36_e2	3	L_metabat_L.45.fa	Cellulomonadaceae	30	C	GH36	GH36	GH36	GH36	GH
Prodigal_2420|LOCUS_23340	-	GH36(137-631)	GH36_e14	3	L_metabat_L.45.fa	Cellulomonadaceae	30	C	GH36	GH36	GH36	GH36	GH
Prodigal_2304|LOCUS_22270	-|-	GH39(126-262)+CBM35(436-565)	GH39_e70+CBM35_e41	3	L_metabat_L.45.fa	Cellulomonadaceae	30	C	CBM35	GH39	GH39	GH39	GH
Prodigal_3110|LOCUS_29650	3.2.1.37:10	GH39(13-454)	GH39_e74	3	L_metabat_L.45.fa	Cellulomonadaceae	30	C	GH39	GH39	GH39	GH39	GH
Prodigal_1484|LOCUS_14500	3.2.1.23:10	GH42(30-398)	GH42_e34	3	L_metabat_L.45.fa	Cellulomonadaceae	30	C	GH42	GH42	GH42	GH42	GH	GH42
Prodigal_3111|LOCUS_29660	-	GH42(21-392)	GH42_e26	3	L_metabat_L.45.fa	Cellulomonadaceae	30	C	GH42	GH42	GH42	GH42	GH	GH42
Prodigal_3357|LOCUS_31790	-	GH42(19-396)	GH42_e2	3	L_metabat_L.45.fa	Cellulomonadaceae	30	C	GH42	GH42	GH42	GH42	GH	GH42
Prodigal_90|LOCUS_00900	-	GH42(21-386)	GH42_e6	3	L_metabat_L.45.fa	Cellulomonadaceae	30	C	GH42	GH42	GH42	GH42	GH	GH42
Prodigal_1903|LOCUS_18480	3.2.1.55:1|3.2.1.145:2	GH43_22(88-300)+CBM13(355-448)	GH43_e135+CBM13_e360	3	L_metabat_L.45.fa	Cellulomonadaceae	30	C	GH43	GH43	GH43	GH43	GH	GH43
Prodigal_1904|LOCUS_18490	3.2.1.55:1|3.2.1.8:18|3.2.1.55:2	GH43_22(93-317)+CBM13(380-468)	GH43_e135+CBM13_e338	3	L_metabat_L.45.fa	Cellulomonadaceae	30	C	GH43	GH43	GH43	GH43	GH	GH43
Prodigal_2003|LOCUS_19420	3.2.1.145:2|-	GH43_24(54-293)	GH43_e262+CBM13_e62	3	L_metabat_L.45.fa	Cellulomonadaceae	30	C	CBM13	GH43	GH43	GH43	GH	GH43
Prodigal_2759|LOCUS_26480	-	GH43_5(78-379)	GH43_e99	3	L_metabat_L.45.fa	Cellulomonadaceae	30	C	GH43	GH43	GH43	GH43	GH	GH43
Prodigal_2944|LOCUS_28190	-	GH43_5(45-351)	GH43_e95	3	L_metabat_L.45.fa	Cellulomonadaceae	30	C	GH43	GH43	GH43	GH43	GH	GH43
Prodigal_3061|LOCUS_29220	3.2.1.55:1|3.2.1.55:5	GH43_22(99-323)+GH51_2(568-1193)	GH43_e135+GH51_e47	3	L_metabat_L.45.fa	Cellulomonadaceae	30	C	GH43	GH43	GH43	GH43	GH	GH43
Prodigal_2940|LOCUS_28150	3.2.1.176:20|3.2.1.4:3|3.2.1.-:3|3.2.1.151:2|3.2.1.14:1|-	GH48(59-692)+CBM2(735-826)	GH48_e1+CBM2_e10	3	L_metabat_L.45.fa	Cellulomonadaceae	30	C	CBM2	GH48	GH48	GH48	GH	GH48
Prodigal_1898|LOCUS_18430	3.2.1.132:1|3.2.1.4:1	GH5_2(148-390)	GH5_e46	3	L_metabat_L.45.fa	Cellulomonadaceae	30	C	CBM35	GH5	GH5	GH5	GH	GH5
Prodigal_971|LOCUS_09550	3.2.1.78:15|-	GH5_8(49-299)+CBM2(373-460)	GH5_e22+CBM2_e10	3	L_metabat_L.45.fa	Cellulomonadaceae	30	C	CBM2	GH5	GH5	GH5	GH	GH5
Prodigal_2945|LOCUS_28200	3.2.1.55:37	GH51_1(6-500)	GH51_e0	3	L_metabat_L.45.fa	Cellulomonadaceae	30	C	GH51	GH51	GH51	GH51	GH	GH51
Prodigal_3060|LOCUS_29210	3.2.1.55:27	GH51_1(10-515)	GH51_e19	3	L_metabat_L.45.fa	Cellulomonadaceae	30	C	GH51	GH51	GH51	GH51	GH	GH51
Prodigal_2125|LOCUS_20570	3.2.1.-:5	GH55_1(324-617)	GH55_e16	3	L_metabat_L.45.fa	Cellulomonadaceae	30	C	GH55	GH55	GH55	GH55	GH
Prodigal_1902|LOCUS_18470	-	GH59(79-792)	GH59_e4	3	L_metabat_L.45.fa	Cellulomonadaceae	30	C	GH59	GH59	GH59	GH59	GH
Prodigal_2800|LOCUS_26850	3.2.1.55:25|3.2.1.-:1	GH62(65-191)	GH62_e0	2	L_metabat_L.45.fa	Cellulomonadaceae	30	C		GH62	GH62	GH62	GH	GH62
Prodigal_1123|LOCUS_11020	2.4.1.282:1|2.4.1.216:1	GH65(321-727)	GH65_e15	3	L_metabat_L.45.fa	Cellulomonadaceae	30	C	GH65	GH65	GH65	GH65	GH
Prodigal_2599|LOCUS_25030	3.2.1.139:12|3.2.1.131:10	GH67(200-806)	GH67_e1	3	L_metabat_L.45.fa	Cellulomonadaceae	30	C	GH67	GH67	GH67	GH67	GH	GH67
Prodigal_1639|LOCUS_15950	3.2.1.151:27|3.2.1.150:4|3.2.1.151:27|3.2.1.150:4|3.2.1.151:27|3.2.1.150:4|3.2.1.151:27|3.2.1.150:4|-	GH74(122-233)+GH74(615-719)+CBM2(842-943)	GH74_e1+GH74_e1+GH74_e1+GH74_e1+CBM2_e97	3	L_metabat_L.45.fa	Cellulomonadaceae	30	C	CBM2	GH74	GH74	GH74	GH	GH74
Prodigal_1991|LOCUS_19300	2.4.1.25:4	GH77(246-755)	GH77_e2	3	L_metabat_L.45.fa	Cellulomonadaceae	30	C	GH77	GH77	GH77	GH77	GH
Prodigal_3363|LOCUS_31850	3.2.1.40:1|3.2.1.40:8|3.1.1.73:2	GH78(206-730)	CBM67_e28+GH78_e80	3	L_metabat_L.45.fa	Cellulomonadaceae	30	C	GH78	GH78	CBM67	GH78	GH
Prodigal_1399|LOCUS_13690	3.2.1.59:1	GH87(173-902)	GH87_e0	3	L_metabat_L.45.fa	Cellulomonadaceae	30	C	CBM32	GH87	GH87	GH87	GH
Prodigal_1487|LOCUS_14530	-	GH87(181-1117)	GH87_e7	3	L_metabat_L.45.fa	Cellulomonadaceae	30	C	CBM32	GH87	GH87	GH87	GH
Prodigal_3752|LOCUS_34940	3.2.1.4:52|3.2.1.73:6|3.2.1.176:2|3.2.1.78:1|3.2.1.4:55|3.2.1.176:4|3.2.1.78:4|3.2.1.-:3|3.2.1.151:3|3.2.1.8:1|3.2.1.91:1|-	GH9(43-479)+CBM2(693-791)	GH9_e22+CBM3_e0+CBM2_e74	3	L_metabat_L.45.fa	Cellulomonadaceae	30	C	CBM2	GH9	GH9	GH9	GH	GH9
Prodigal_1132|LOCUS_11110	3.2.1.-:3|3.2.1.63:2	GH95(16-774)	GH95_e1	3	L_metabat_L.45.fa	Cellulomonadaceae	30	C	GH95	GH95	GH95	GH95	GH
Prodigal_1483|LOCUS_14490	4.2.2.23:15|4.2.2.24:5	PL11(406-817)	PL11_e0	3	L_metabat_L.45.fa	Cellulomonadaceae	30	C	PL11	PL11	PL11	PL11	PL	PL11
Prodigal_2394|LOCUS_23100	-	PL8(432-691)	PL8_e14	3	L_metabat_L.45.fa	Cellulomonadaceae	30	C	PL8	PL8	PL8	PL8	PL
Prodigal_3184|LOCUS_21880	-	AA4(6-217)	AA4_e1	2	maxbin_LW.091.fasta	Cyclobacteriaceae	28	C		AA4	AA4	AA4	AA	AA4
Prodigal_132|LOCUS_01160	2.4.1.18:57|2.4.1.18:14	CBM48(26-110)+GH13_9(179-479)	CBM48_e2+GH13_e200	3	maxbin_LW.091.fasta	Cyclobacteriaceae	28	C	CBM48	CBM48	CBM48	CBM48	CBM
Prodigal_65|LOCUS_00580	-	CE11(5-222)	CE11_e18	3	maxbin_LW.091.fasta	Cyclobacteriaceae	28	C	CE11	CE11	CE11	CE11	CE	CE11
Prodigal_302|LOCUS_02600	-	CE14(6-111)	CE14_e10	2	maxbin_LW.091.fasta	Cyclobacteriaceae	28	C		CE14	CE14	CE14	CE	CE14
Prodigal_3575|LOCUS_23730	-	CE14(32-142)	CE14_e18	2	maxbin_LW.091.fasta	Cyclobacteriaceae	28	C		CE14	CE14	CE14	CE	CE14
Prodigal_4244|LOCUS_25850	-	CE14(5-109)	CE14_e54	2	maxbin_LW.091.fasta	Cyclobacteriaceae	28	C		CE14	CE14	CE14	CE	CE14
Prodigal_720|LOCUS_05950	-	CE19(24-355)	CE19_e4	3	maxbin_LW.091.fasta	Cyclobacteriaceae	28	C	CE19	CE19	CE19	CE19	CE	CE19
Prodigal_520|LOCUS_04390	-	CE20(101-351)	CE20_e28	3	maxbin_LW.091.fasta	Cyclobacteriaceae	28	C	CE20	CE20	CE20	CE20	CE	CE20
Prodigal_111|LOCUS_00970	-	CE4(24-132)	CE4_e309	2	maxbin_LW.091.fasta	Cyclobacteriaceae	28	C		CE4	CE4	CE4	CE	CE4
Prodigal_3213|LOCUS_22030	-	CE7(59-243)	CE7_e36	2	maxbin_LW.091.fasta	Cyclobacteriaceae	28	C		CE7	CE7	CE7	CE	CE7
Prodigal_126|LOCUS_01100	3.2.1.23:1	GH1(7-445)	GH1_e79	3	maxbin_LW.091.fasta	Cyclobacteriaceae	28	C	GH1	GH1	GH1	GH1	GH	GH1
Prodigal_1603|LOCUS_12570	-	GH109(49-460)	GH109_e5	3	maxbin_LW.091.fasta	Cyclobacteriaceae	28	C	GH109	GH109	GH109	GH109	GH
Prodigal_2386|LOCUS_17640	-	GH109(4-193)	GH109_e7	2	maxbin_LW.091.fasta	Cyclobacteriaceae	28	C		GH109	GH109	GH109	GH
Prodigal_2654|LOCUS_19210	-	GH109(4-227)	GH109_e7	2	maxbin_LW.091.fasta	Cyclobacteriaceae	28	C		GH109	GH109	GH109	GH
Prodigal_2779|LOCUS_19770	-	GH109(38-192)	GH109_e7	2	maxbin_LW.091.fasta	Cyclobacteriaceae	28	C		GH109	GH109	GH109	GH
Prodigal_2842|LOCUS_20110	3.2.1.49:6|3.2.1.52:2	GH109(60-457)	GH109_e0	3	maxbin_LW.091.fasta	Cyclobacteriaceae	28	C	GH109	GH109	GH109	GH109	GH
Prodigal_2881|LOCUS_20350	-	GH109(1-174)	GH109_e7	2	maxbin_LW.091.fasta	Cyclobacteriaceae	28	C		GH109	GH109	GH109	GH
Prodigal_3004|LOCUS_21020	2.4.1.4:2	GH13_4(3-313)	GH13_e181	3	maxbin_LW.091.fasta	Cyclobacteriaceae	28	C	GH13	GH13	GH13	GH13	GH
Prodigal_885|LOCUS_07260	5.4.99.11:5|3.2.1.20:4|3.2.1.10:1|3.2.1.-:1|3.2.1.70:1	GH13_31(57-397)	GH13_e122	3	maxbin_LW.091.fasta	Cyclobacteriaceae	28	C	GH13	GH13	GH13	GH13	GH
Prodigal_631|LOCUS_05240	2.4.1.281:5	GH130_1(49-361)	GH130_e6	3	maxbin_LW.091.fasta	Cyclobacteriaceae	28	C	GH130	GH130	GH130	GH130	GH
Prodigal_1381|LOCUS_10950	-	GH140(137-517)	GH140_e2	3	maxbin_LW.091.fasta	Cyclobacteriaceae	28	C	GH140	GH140	GH140	GH140	GH
Prodigal_229|LOCUS_02000	-	GH15(219-581)	GH15_e57	3	maxbin_LW.091.fasta	Cyclobacteriaceae	28	C	GH15	GH15	GH15	GH15	GH
Prodigal_1478|LOCUS_11650	-	GH171(24-394)	GH171_e22	3	maxbin_LW.091.fasta	Cyclobacteriaceae	28	C	GH171	GH171	GH171	GH171	GH
Prodigal_77|LOCUS_00690	-	GH171(55-393)	GH171_e3	3	maxbin_LW.091.fasta	Cyclobacteriaceae	28	C	GH171	GH171	GH171	GH171	GH
Prodigal_1156|LOCUS_09330	3.2.1.52:18|3.2.1.-:1	GH20(156-515)	GH20_e12	3	maxbin_LW.091.fasta	Cyclobacteriaceae	28	C	CBM0	GH20	GH20	GH20	GH
Prodigal_1104|LOCUS_08930	-	GH23(107-242)	GH23_e357	2	maxbin_LW.091.fasta	Cyclobacteriaceae	28	C		GH23	GH23	GH23	GH
Prodigal_2508|LOCUS_18370	-	GH23(334-488)	GH23_e642	3	maxbin_LW.091.fasta	Cyclobacteriaceae	28	C	GH23	GH23	GH23	GH23	GH
Prodigal_1318|LOCUS_10490	-	GH26(46-323)	GH26_e48	3	maxbin_LW.091.fasta	Cyclobacteriaceae	28	C	GH26	GH26	GH26	GH26	GH	GH26
Prodigal_633|LOCUS_05260	3.2.1.100:1	GH26(25-338)	GH26_e13	3	maxbin_LW.091.fasta	Cyclobacteriaceae	28	C	GH26	GH26	GH26	GH26	GH	GH26
Prodigal_1271|LOCUS_10160	3.2.1.21:20|3.2.1.-:6	GH3(102-323)	GH3_e1	3	maxbin_LW.091.fasta	Cyclobacteriaceae	28	C	GH3	GH3	GH3	GH3	GH	GH3
Prodigal_1073|LOCUS_08710	3.2.1.26:3	GH32(84-390)	GH32_e101	2	maxbin_LW.091.fasta	Cyclobacteriaceae	28	C		GH32	GH32	GH32	GH
Prodigal_501|LOCUS_04240	-	GH32(18-256)	GH32_e73	3	maxbin_LW.091.fasta	Cyclobacteriaceae	28	C	GH0	GH32	GH32	GH32	GH
Prodigal_716|LOCUS_05920	3.2.1.26:1	GH32(1-298)	GH32_e44	3	maxbin_LW.091.fasta	Cyclobacteriaceae	28	C	GH32	GH32	GH32	GH32	GH
Prodigal_1604|LOCUS_12580	3.2.1.18:2	GH33(178-519)	GH33_e132	3	maxbin_LW.091.fasta	Cyclobacteriaceae	28	C	GH33	GH33	GH33	GH33	GH
Prodigal_2097|LOCUS_15830	-	GH33(32-379)	GH33_e30	3	maxbin_LW.091.fasta	Cyclobacteriaceae	28	C	GH33	GH33	GH33	GH33	GH
Prodigal_2528|LOCUS_18490	3.2.1.28:18	GH37(72-545)	GH37_e6	3	maxbin_LW.091.fasta	Cyclobacteriaceae	28	C	GH37	GH37	GH37	GH37	GH
Prodigal_2445|LOCUS_18010	3.2.1.78:2	GH5_36(48-353)	GH5_e254	3	maxbin_LW.091.fasta	Cyclobacteriaceae	28	C	GH5	GH5	GH5	GH5	GH	GH5
Prodigal_131|LOCUS_01150	3.2.1.1:1	GH57(35-324)	GH57_e36	3	maxbin_LW.091.fasta	Cyclobacteriaceae	28	C	GH57	GH57	GH57	GH57	GH
Prodigal_1707|LOCUS_13290	-	GH88(52-440)	GH88_e31	3	maxbin_LW.091.fasta	Cyclobacteriaceae	28	C	GH88	GH88	GH88	GH88	GH
Prodigal_1882|LOCUS_14480	-	PL12(418-561)	PL12_e31	3	maxbin_LW.091.fasta	Cyclobacteriaceae	28	C	PL12	PL12	PL12	PL12	PL	PL12
Prodigal_2376|LOCUS_17580	-	PL12(415-542)	PL12_e30	3	maxbin_LW.091.fasta	Cyclobacteriaceae	28	C	PL12	PL12	PL12	PL12	PL	PL12
Prodigal_155|LOCUS_01360	-	PL38(82-361)	PL38_e9	3	maxbin_LW.091.fasta	Cyclobacteriaceae	28	C	PL38	PL38	PL38	PL38	PL
Prodigal_834|LOCUS_06880	3.2.1.-:1	-	PL42_e7	2	maxbin_LW.091.fasta	Cyclobacteriaceae	28	C	PL42		PL42	PL42	PL	PL42
Prodigal_2118|LOCUS_15970	-	PL8_3(356-607)	PL8_e32	3	maxbin_LW.091.fasta	Cyclobacteriaceae	28	C	PL8	PL8	PL8	PL8	PL
Prodigal_3157|LOCUS_27990	-	AA4(12-246)	AA4_e1	2	LW_metabat_LW.43.fa	Desulfobacterales	39	D		AA4	AA4	AA4	AA	AA4
Prodigal_3167|LOCUS_28060	1.1.3.-:1	AA7(32-458)	AA7_e0	2	LW_metabat_LW.43.fa	Desulfobacterales	39	D		AA7	AA7	AA7	AA	AA7
Prodigal_3533|LOCUS_30690	3.1.1.72:1|3.2.1.8:1	CE1(47-194)	CE1_e24	2	LW_metabat_LW.43.fa	Desulfobacterales	39	D		CE1	CE1	CE1	CE	CE1
Prodigal_1128|LOCUS_10590	-	CE4(157-293)	CE4_e274	2	LW_metabat_LW.43.fa	Desulfobacterales	39	D		CE4	CE4	CE4	CE	CE4
Prodigal_2066|LOCUS_18960	-	GH102(154-311)	GH102_e24	3	LW_metabat_LW.43.fa	Desulfobacterales	39	D	GH102	GH102	GH102	GH102	GH	GH102
Prodigal_2128|LOCUS_19490	-|-|-|-	GH23(218-350)	GH23_e851+CBM50_e868+CBM50_e868+CBM50_e868	3	LW_metabat_LW.43.fa	Desulfobacterales	39	D	CBM50	GH23	GH23	GH23	GH
Prodigal_3578|LOCUS_31000	-|-	GH23(85-220)	GH23_e710+CBM50_e295	3	LW_metabat_LW.43.fa	Desulfobacterales	39	D	CBM50	GH23	GH23	GH23	GH
Prodigal_36|LOCUS_00350	-	GH23(336-475)	GH23_e638	3	LW_metabat_LW.43.fa	Desulfobacterales	39	D	GH23	GH23	GH23	GH23	GH
Prodigal_1617|LOCUS_15040	-	GH88(52-445)	GH88_e31	3	LW_metabat_LW.43.fa	Desulfobacterales	39	D	GH88	GH88	GH88	GH88	GH
Prodigal_647|LOCUS_05800	-	AA4(9-247)	AA4_e1	2	maxbin_L.006.fasta	Domibacillaceae	2	A		AA4	AA4	AA4	AA	AA4
Prodigal_1376|LOCUS_11370	-|-|-	CBM50(94-135)+CBM50(164-206)	CBM50_e833+CBM50_e438+CBM50_e974	3	maxbin_L.006.fasta	Domibacillaceae	2	A	CBM50	CBM50	CBM50	CBM50	CBM
Prodigal_176|LOCUS_01660	3.2.1.-:3|3.2.1.-:3|3.2.1.-:3	GH18(155-418)	CBM50_e699+CBM50_e699+GH18_e157	3	maxbin_L.006.fasta	Domibacillaceae	2	A	CBM50	GH18	CBM50	CBM50	CBM
Prodigal_2057|LOCUS_15850	-	CBM50(28-69)	CBM50_e375	2	maxbin_L.006.fasta	Domibacillaceae	2	A		CBM50	CBM50	CBM50	CBM
Prodigal_1427|LOCUS_11740	-	CE4(125-248)	CE4_e138	2	maxbin_L.006.fasta	Domibacillaceae	2	A		CE4	CE4	CE4	CE	CE4
Prodigal_2326|LOCUS_17250	-	CE4(112-231)	CE4_e305	2	maxbin_L.006.fasta	Domibacillaceae	2	A		CE4	CE4	CE4	CE	CE4
Prodigal_868|LOCUS_07670	-	CE4(52-175)	CE4_e14	3	maxbin_L.006.fasta	Domibacillaceae	2	A	CE4	CE4	CE4	CE4	CE	CE4
Prodigal_1070|LOCUS_09220	3.5.1.25:7	CE9(9-385)	CE9_e51	3	maxbin_L.006.fasta	Domibacillaceae	2	A	CE9	CE9	CE9	CE9	CE	CE9
Prodigal_389|LOCUS_03580	3.2.1.93:2	GH13_29(27-372)	GH13_e1	3	maxbin_L.006.fasta	Domibacillaceae	2	A	GH13	GH13	GH13	GH13	GH
Prodigal_1677|LOCUS_13470	-	GH23(51-184)	GH23_e188	3	maxbin_L.006.fasta	Domibacillaceae	2	A	GH23	GH23	GH23	GH23	GH
Prodigal_940|LOCUS_08270	3.2.1.17:12|4.2.2.n1:6	GH23(105-207)	GH23_e335	3	maxbin_L.006.fasta	Domibacillaceae	2	A	GH23	GH23	GH23	GH23	GH
Prodigal_20|LOCUS_00190	-	-	GH23_e126	2	maxbin_L.006.fasta	Domibacillaceae	2	A	GH23		GH23	GH23	GH
Prodigal_4|LOCUS_00030	3.2.1.17:1	GH25(6-179)	GH25_e249	2	maxbin_L.006.fasta	Domibacillaceae	2	A		GH25	GH25	GH25	GH
Prodigal_861|LOCUS_07610	3.2.1.122:13	GH4(6-183)	GH4_e4	3	maxbin_L.006.fasta	Domibacillaceae	2	A	GH4	GH4	GH4	GH4	GH
Prodigal_958|LOCUS_08390	3.2.1.122:13	GH4(8-185)	GH4_e4	3	maxbin_L.006.fasta	Domibacillaceae	2	A	GH4	GH4	GH4	GH4	GH
Prodigal_1930|LOCUS_17380	1.1.3.-:1	AA7(30-455)	AA7_e0	2	LW_10984.fna	DSSB01	74	F		AA7	AA7	AA7	AA	AA7
Prodigal_1939|LOCUS_17440	-	CE4(23-131)	CE4_e242	2	LW_10984.fna	DSSB01	74	F		CE4	CE4	CE4	CE	CE4
Prodigal_1054|LOCUS_09810	-	GH171(21-386)	GH171_e23	3	LW_10984.fna	DSSB01	74	F	GH171	GH171	GH171	GH171	GH
Prodigal_1837|LOCUS_16560	3.2.1.17:12|4.2.2.n1:6	GH23(21-126)	GH23_e335	2	LW_10984.fna	DSSB01	74	F		GH23	GH23	GH23	GH
Prodigal_1885|LOCUS_16980	-	GH23(457-584)	GH23_e1000	2	LW_10984.fna	DSSB01	74	F		GH23	GH23	GH23	GH
Prodigal_29|LOCUS_00280	-	GH23(114-253)	GH23_e598	2	LW_10984.fna	DSSB01	74	F		GH23	GH23	GH23	GH
Prodigal_460|LOCUS_04360	-	GH23(233-347)	GH23_e990	2	LW_10984.fna	DSSB01	74	F		GH23	GH23	GH23	GH
Prodigal_887|LOCUS_08300	3.2.1.17:12|4.2.2.n1:6	GH23(110-216)	GH23_e335	2	LW_10984.fna	DSSB01	74	F		GH23	GH23	GH23	GH
Prodigal_859|LOCUS_08040	-	GH24(69-205)	GH24_e182	2	LW_10984.fna	DSSB01	74	F		GH24	GH24	GH24	GH
Prodigal_1889|LOCUS_17020	-	GH3(67-289)	GH3_e44	2	LW_10984.fna	DSSB01	74	F		GH3	GH3	GH3	GH	GH3
Prodigal_722|LOCUS_06760	-	GH3(165-393)	GH3_e52	2	LW_10984.fna	DSSB01	74	F		GH3	GH3	GH3	GH	GH3
Prodigal_1050|LOCUS_09780	2.4.1.230:11	GH65(308-696)	GH65_e4	3	LW_10984.fna	DSSB01	74	F	GH65	GH65	GH65	GH65	GH
Prodigal_1729|LOCUS_15660	2.4.1.282:1|2.4.1.216:1	GH65(317-726)	GH65_e15	3	LW_10984.fna	DSSB01	74	F	GH65	GH65	GH65	GH65	GH
Prodigal_2253|LOCUS_18270	-	CE14(11-118)	CE14_e51	2	C_metabat_C.25.fa	E44-bin32 (a)	64	F		CE14	CE14	CE14	CE	CE14
Prodigal_1386|LOCUS_11930	-	CE4(67-197)	CE4_e274	2	C_metabat_C.25.fa	E44-bin32 (a)	64	F		CE4	CE4	CE4	CE	CE4
Prodigal_646|LOCUS_05870	-	GH1(6-422)	GH1_e74	3	C_metabat_C.25.fa	E44-bin32 (a)	64	F	GH1	GH1	GH1	GH1	GH	GH1
Prodigal_2128|LOCUS_17440	-	GH109(20-170)	GH109_e7	2	C_metabat_C.25.fa	E44-bin32 (a)	64	F		GH109	GH109	GH109	GH
Prodigal_1645|LOCUS_13950	2.4.1.319:4|2.4.1.320:2	GH130_2(19-315)	GH130_e13	3	C_metabat_C.25.fa	E44-bin32 (a)	64	F	GH130	GH130	GH130	GH130	GH
Prodigal_340|LOCUS_03170	-	GH149(25-1153)	GH149_e1	3	C_metabat_C.25.fa	E44-bin32 (a)	64	F	GH149	GH149	GH149	GH149	GH
Prodigal_553|LOCUS_05070	-	GH15(7-346)	GH15_e23	2	C_metabat_C.25.fa	E44-bin32 (a)	64	F		GH15	GH15	GH15	GH
Prodigal_342|LOCUS_03190	3.2.1.25:9	GH2(27-740)	GH2_e111	3	C_metabat_C.25.fa	E44-bin32 (a)	64	F	GH2	GH2	GH2	GH2	GH	GH2
Prodigal_478|LOCUS_04440	3.2.1.17:12|4.2.2.n1:6	GH23(106-201)	GH23_e335	2	C_metabat_C.25.fa	E44-bin32 (a)	64	F		GH23	GH23	GH23	GH
Prodigal_1043|LOCUS_09250	3.2.1.21:5|3.2.1.38:1|3.2.1.-:1	GH3(130-379)	GH3_e94	3	C_metabat_C.25.fa	E44-bin32 (a)	64	F	GH3	GH3	GH3	GH3	GH	GH3
Prodigal_1272|LOCUS_11060	3.2.1.21:22|3.2.1.-:4|3.2.1.37:1|3.2.1.55:1|3.2.1.23:1|3.2.1.45:1	GH3(32-249)	GH3_e197	3	C_metabat_C.25.fa	E44-bin32 (a)	64	F	GH3	GH3	GH3	GH3	GH	GH3
Prodigal_808|LOCUS_07260	3.2.1.37:15|3.2.1.55:3|3.2.1.21:1	GH3(80-306)	GH3_e88	3	C_metabat_C.25.fa	E44-bin32 (a)	64	F	GH3	GH3	GH3	GH3	GH	GH3
Prodigal_1206|LOCUS_10560	2.4.1.18:3|3.2.1.1:1	GH57(8-439)	GH57_e46	3	C_metabat_C.25.fa	E44-bin32 (a)	64	F	GH57	GH57	GH57	GH57	GH
Prodigal_1370|LOCUS_11800	-	GH63(196-579)	GH63_e16	3	C_metabat_C.25.fa	E44-bin32 (a)	64	F	GH63	GH63	GH63	GH63	GH
Prodigal_552|LOCUS_05060	3.2.1.11:1	GH66(9-552)	GH66_e4	2	C_metabat_C.25.fa	E44-bin32 (a)	64	F		GH66	GH66	GH66	GH
Prodigal_1044|LOCUS_09260	2.4.1.20:14|2.4.1.49:1	GH94(2-809)	GH94_e12	3	C_metabat_C.25.fa	E44-bin32 (a)	64	F	GH94	GH94	GH94	GH94	GH	GH94
Prodigal_8|LOCUS_00080	-	PL12(451-587)	PL12_e28	3	C_metabat_C.25.fa	E44-bin32 (a)	64	F	PL0	PL12	PL12	PL12	PL	PL12
Prodigal_1402|LOCUS_11300	-	AA4(10-244)	AA4_e1	2	CW_metabat_CW.123.fa	E44-bin32 (b)	20	B		AA4	AA4	AA4	AA	AA4
Prodigal_1195|LOCUS_09810	3.1.1.72:1|3.2.1.8:1	CE1(41-283)	CE1_e24	2	CW_metabat_CW.123.fa	E44-bin32 (b)	20	B		CE1	CE1	CE1	CE	CE1
Prodigal_2038|LOCUS_15340	-	CE1(7-216)	CE1_e22	2	CW_metabat_CW.123.fa	E44-bin32 (b)	20	B		CE1	CE1	CE1	CE	CE1
Prodigal_723|LOCUS_06240	-	CE1(66-281)	CE1_e22	2	CW_metabat_CW.123.fa	E44-bin32 (b)	20	B		CE1	CE1	CE1	CE	CE1
Prodigal_1417|LOCUS_11410	-	GH1(7-420)	GH1_e74	3	CW_metabat_CW.123.fa	E44-bin32 (b)	20	B	GH1	GH1	GH1	GH1	GH	GH1
Prodigal_1903|LOCUS_14590	3.2.1.17:12|4.2.2.n1:6	GH23(70-168)	GH23_e335	2	CW_metabat_CW.123.fa	E44-bin32 (b)	20	B		GH23	GH23	GH23	GH
Prodigal_73|LOCUS_00690	-	GH23(661-789)	GH23_e934	3	CW_metabat_CW.123.fa	E44-bin32 (b)	20	B	GH23	GH23	GH23	GH23	GH
Prodigal_1459|LOCUS_13750	2.4.1.18:57|2.4.1.18:14	CBM48(29-117)+GH13_9(184-483)	CBM48_e2+GH13_e200	3	L_metabat_L.119.fa	Flavobacteriaceae	29	C	CBM48	CBM48	CBM48	CBM48	CBM
Prodigal_2498|LOCUS_22640	-|-|-|-	-	CBM50_e791+CBM50_e791+CBM50_e791+CBM50_e791	2	L_metabat_L.119.fa	Flavobacteriaceae	29	C	CBM50		CBM50	CBM50	CBM
Prodigal_1943|LOCUS_18070	-|-	CBM67(38-202)+GH78(275-773)	CBM67_e22+GH78_e33	3	L_metabat_L.119.fa	Flavobacteriaceae	29	C	CBM67	CBM67	CBM67	CBM67	CBM
Prodigal_1474|LOCUS_13880	-	CE1(50-324)	CE1_e22	2	L_metabat_L.119.fa	Flavobacteriaceae	29	C		CE1	CE1	CE1	CE	CE1
Prodigal_1676|LOCUS_15730	-	CE11(4-237)	CE11_e29	3	L_metabat_L.119.fa	Flavobacteriaceae	29	C	CE11	CE11	CE11	CE11	CE	CE11
Prodigal_2689|LOCUS_24120	-	CE14(6-111)	CE14_e27	3	L_metabat_L.119.fa	Flavobacteriaceae	29	C	CE14	CE14	CE14	CE14	CE	CE14
Prodigal_1815|LOCUS_16970	-	CE20(104-356)	CE20_e28	3	L_metabat_L.119.fa	Flavobacteriaceae	29	C	CE20	CE20	CE20	CE20	CE	CE20
Prodigal_1302|LOCUS_12330	3.2.1.49:3	GH109(35-432)	GH109_e1	3	L_metabat_L.119.fa	Flavobacteriaceae	29	C	GH109	GH109	GH109	GH109	GH
Prodigal_2028|LOCUS_18790	-	GH109(30-182)	GH109_e7	2	L_metabat_L.119.fa	Flavobacteriaceae	29	C		GH109	GH109	GH109	GH
Prodigal_98|LOCUS_00940	-	GH113(23-327)	GH113_e22	3	L_metabat_L.119.fa	Flavobacteriaceae	29	C	GH113	GH113	GH113	GH113	GH
Prodigal_1993|LOCUS_18510	3.2.1.185:1	GH127(53-597)	GH127_e4	3	L_metabat_L.119.fa	Flavobacteriaceae	29	C	GH127	GH127	GH127	GH127	GH
Prodigal_123|LOCUS_01190	3.2.1.20:2	GH13_38(65-460)	GH13_e113	3	L_metabat_L.119.fa	Flavobacteriaceae	29	C	GH13	GH13	GH13	GH13	GH
Prodigal_124|LOCUS_01200	3.2.1.54:1	GH13_46(171-494)	GH13_e217	3	L_metabat_L.119.fa	Flavobacteriaceae	29	C	GH13	GH13	GH13	GH13	GH
Prodigal_1534|LOCUS_14430	-	GH13_19(181-429)	GH13_e123	3	L_metabat_L.119.fa	Flavobacteriaceae	29	C	GH13	GH13	GH13	GH13	GH
Prodigal_272|LOCUS_02630	5.4.99.11:5|3.2.1.20:4|3.2.1.10:1|3.2.1.-:1|3.2.1.70:1	GH13_31(58-398)	GH13_e122	3	L_metabat_L.119.fa	Flavobacteriaceae	29	C	GH13	GH13	GH13	GH13	GH
Prodigal_2734|LOCUS_24470	2.4.1.4:2	GH13_4(103-500)	GH13_e181	3	L_metabat_L.119.fa	Flavobacteriaceae	29	C	GH13	GH13	GH13	GH13	GH
Prodigal_210|LOCUS_02030	-	GH130_3(50-360)	GH130_e33	3	L_metabat_L.119.fa	Flavobacteriaceae	29	C	GH130	GH130	GH130	GH130	GH
Prodigal_884|LOCUS_08460	-	GH15(220-582)	GH15_e39	3	L_metabat_L.119.fa	Flavobacteriaceae	29	C	GH15	GH15	GH15	GH15	GH
Prodigal_2370|LOCUS_21640	-	GH16_3(56-290)	GH16_e329	3	L_metabat_L.119.fa	Flavobacteriaceae	29	C	GH16	GH16	GH16	GH16	GH	GH16
Prodigal_2978|LOCUS_26100	3.2.1.39:1	GH17(103-414)	GH17_e61	3	L_metabat_L.119.fa	Flavobacteriaceae	29	C	GH17	GH17	GH17	GH17	GH
Prodigal_83|LOCUS_00810	3.2.1.52:6	GH20(175-492)	GH20_e114	3	L_metabat_L.119.fa	Flavobacteriaceae	29	C	GH20	GH20	GH20	GH20	GH
Prodigal_1786|LOCUS_16730	-	GH23(104-238)	GH23_e357	3	L_metabat_L.119.fa	Flavobacteriaceae	29	C	GH23	GH23	GH23	GH23	GH
Prodigal_2684|LOCUS_24070	-	GH23(317-470)	GH23_e718	3	L_metabat_L.119.fa	Flavobacteriaceae	29	C	GH23	GH23	GH23	GH23	GH
Prodigal_1819|LOCUS_17010	3.2.1.51:58	GH29(16-365)	GH29_e70	3	L_metabat_L.119.fa	Flavobacteriaceae	29	C	GH29	GH29	GH29	GH29	GH
Prodigal_1653|LOCUS_15540	3.2.1.21:20|3.2.1.-:6	GH3(105-326)	GH3_e1	3	L_metabat_L.119.fa	Flavobacteriaceae	29	C	GH3	GH3	GH3	GH3	GH	GH3
Prodigal_1769|LOCUS_16580	-	GH3(99-326)	GH3_e104	3	L_metabat_L.119.fa	Flavobacteriaceae	29	C	GH3	GH3	GH3	GH3	GH	GH3
Prodigal_1899|LOCUS_17690	3.2.1.21:33|3.2.1.37:3|3.2.1.-:3|3.2.1.74:1	GH3(124-338)	GH3_e165	3	L_metabat_L.119.fa	Flavobacteriaceae	29	C	GH3	GH3	GH3	GH3	GH	GH3
Prodigal_2288|LOCUS_20950	3.2.1.21:4	GH3(179-440)	GH3_e198	3	L_metabat_L.119.fa	Flavobacteriaceae	29	C	GH3	GH3	GH3	GH3	GH	GH3
Prodigal_2531|LOCUS_22910	3.2.1.21:33|3.2.1.37:3|3.2.1.-:3|3.2.1.74:1	GH3(122-339)	GH3_e165	3	L_metabat_L.119.fa	Flavobacteriaceae	29	C	GH3	GH3	GH3	GH3	GH	GH3
Prodigal_1460|LOCUS_13760	-	GH31_1(230-673)	GH31_e47	3	L_metabat_L.119.fa	Flavobacteriaceae	29	C	GH31	GH31	GH31	GH31	GH
Prodigal_2922|LOCUS_25740	3.2.1.80:10|3.2.1.65:10|3.2.1.26:7|3.2.1.153:5|3.2.1.64:3|2.4.1.99:3	GH32(14-320)	GH32_e16	3	L_metabat_L.119.fa	Flavobacteriaceae	29	C	GH32	GH32	GH32	GH32	GH
Prodigal_237|LOCUS_02300	3.2.1.28:18	GH37(47-520)	GH37_e6	3	L_metabat_L.119.fa	Flavobacteriaceae	29	C	GH37	GH37	GH37	GH37	GH
Prodigal_347|LOCUS_03340	-|-	GH43_28(56-324)+CBM32(366-476)	GH43_e55+CBM32_e176	3	L_metabat_L.119.fa	Flavobacteriaceae	29	C	GH43	GH43	GH43	GH43	GH	GH43
Prodigal_1992|LOCUS_18500	3.2.1.55:5	GH51_2(203-657)	GH51_e47	3	L_metabat_L.119.fa	Flavobacteriaceae	29	C	GH51	GH51	GH51	GH51	GH	GH51
Prodigal_1994|LOCUS_18520	3.2.1.55:27	GH51_1(22-499)	GH51_e19	3	L_metabat_L.119.fa	Flavobacteriaceae	29	C	GH51	GH51	GH51	GH51	GH	GH51
Prodigal_125|LOCUS_01210	2.4.1.8:9	GH65(324-704)	GH65_e0	3	L_metabat_L.119.fa	Flavobacteriaceae	29	C	GH65	GH65	GH65	GH65	GH
Prodigal_738|LOCUS_07070	3.2.1.139:4|3.2.1.131:3|3.2.1.-:1	GH67(28-696)	GH67_e0	3	L_metabat_L.119.fa	Flavobacteriaceae	29	C	GH67	GH67	GH67	GH67	GH	GH67
Prodigal_958|LOCUS_09150	-|-	GH73(72-200)	GH73_e68+CBM50_e1008	3	L_metabat_L.119.fa	Flavobacteriaceae	29	C	CBM50	GH73	GH73	GH73	GH
Prodigal_1780|LOCUS_16680	-	GH74(225-318)	GH74_e4	3	L_metabat_L.119.fa	Flavobacteriaceae	29	C	GH0	GH74	GH74	GH74	GH	GH74
Prodigal_1816|LOCUS_16980	3.2.1.-:3|3.2.1.63:2	GH95(28-767)	GH95_e1	3	L_metabat_L.119.fa	Flavobacteriaceae	29	C	GH95	GH95	GH95	GH95	GH
Prodigal_377|LOCUS_3370	-	AA1(84-552)	AA1_e20	2	LW_10211.fna	GWA1-39-11	7	A		AA1	AA1	AA1	AA	AA1
Prodigal_266|LOCUS_2430	2.4.1.339:1|2.4.1.340:1|-	GH130_6(21-239)+GH130_6(268-581)	GH130_e37+GH130_e15	3	LW_10211.fna	GWA1-39-11	7	A	GH130	GH130	GH130	GH130	GH
Prodigal_194|LOCUS_1800	4.2.2.n1:2	GH23(195-323)	GH23_e841	2	LW_10211.fna	GWA1-39-11	7	A		GH23	GH23	GH23	GH
Prodigal_490|LOCUS_4320	-	GH37(212-449)	GH37_e0	2	LW_10211.fna	GWA1-39-11	7	A		GH37	GH37	GH37	GH
Prodigal_1517|LOCUS_12930	-	AA4(5-224)	AA4_e1	2	CW_metabat_CW.96.fa	GWC2-71-9	22	B		AA4	AA4	AA4	AA	AA4
Prodigal_4544|LOCUS_34600	1.1.3.-:1	AA7(76-434)	AA7_e0	2	CW_metabat_CW.96.fa	GWC2-71-9	22	B		AA7	AA7	AA7	AA	AA7
Prodigal_4689|LOCUS_35530	1.1.3.-:1	AA7(74-420)	AA7_e0	2	CW_metabat_CW.96.fa	GWC2-71-9	22	B		AA7	AA7	AA7	AA	AA7
Prodigal_1107|LOCUS_09550	-	CE1(148-386)	CE1_e22	2	CW_metabat_CW.96.fa	GWC2-71-9	22	B		CE1	CE1	CE1	CE	CE1
Prodigal_167|LOCUS_01530	-	CE14(35-142)	CE14_e40	2	CW_metabat_CW.96.fa	GWC2-71-9	22	B		CE14	CE14	CE14	CE	CE14
Prodigal_2032|LOCUS_16950	3.2.1.40:2	CE15(46-435)	CE15_e10	3	CW_metabat_CW.96.fa	GWC2-71-9	22	B	CE15	CE15	CE15	CE15	CE	CE15
Prodigal_1022|LOCUS_08860	-	CE4(70-190)	CE4_e139	2	CW_metabat_CW.96.fa	GWC2-71-9	22	B		CE4	CE4	CE4	CE	CE4
Prodigal_2045|LOCUS_17060	-	CE4(71-274)	CE4_e70	2	CW_metabat_CW.96.fa	GWC2-71-9	22	B		CE4	CE4	CE4	CE	CE4
Prodigal_2935|LOCUS_23740	-	CE4(41-156)	CE4_e151	2	CW_metabat_CW.96.fa	GWC2-71-9	22	B		CE4	CE4	CE4	CE	CE4
Prodigal_3221|LOCUS_25810	-	CE4(134-284)	CE4_e95	2	CW_metabat_CW.96.fa	GWC2-71-9	22	B		CE4	CE4	CE4	CE	CE4
Prodigal_3809|LOCUS_29830	-	CE4(54-164)	CE4_e151	2	CW_metabat_CW.96.fa	GWC2-71-9	22	B		CE4	CE4	CE4	CE	CE4
Prodigal_772|LOCUS_06770	-	CE4(40-146)	CE4_e165	2	CW_metabat_CW.96.fa	GWC2-71-9	22	B		CE4	CE4	CE4	CE	CE4
Prodigal_1512|LOCUS_12890	-	CE9(2-312)	CE9_e37	2	CW_metabat_CW.96.fa	GWC2-71-9	22	B		CE9	CE9	CE9	CE	CE9
Prodigal_5139|LOCUS_38390	-	GH109(1-147)	GH109_e2	2	CW_metabat_CW.96.fa	GWC2-71-9	22	B		GH109	GH109	GH109	GH
Prodigal_5316|LOCUS_39360	-	GH109(43-198)	GH109_e2	2	CW_metabat_CW.96.fa	GWC2-71-9	22	B		GH109	GH109	GH109	GH
Prodigal_913|LOCUS_07970	3.2.1.49:3	GH109(34-434)	GH109_e1	3	CW_metabat_CW.96.fa	GWC2-71-9	22	B	GH109	GH109	GH109	GH109	GH
Prodigal_701|LOCUS_06170	-	GH127(333-557)	GH127_e8	3	CW_metabat_CW.96.fa	GWC2-71-9	22	B	CBM66	GH127	GH127	GH127	GH
Prodigal_1007|LOCUS_08750	3.2.1.1:5|3.2.1.54:1	GH13_36(71-391)	GH13_e13	3	CW_metabat_CW.96.fa	GWC2-71-9	22	B	GH13	GH13	GH13	GH13	GH
Prodigal_3313|LOCUS_26430	-	GH13_14(293-617)	GH13_e228	3	CW_metabat_CW.96.fa	GWC2-71-9	22	B	GH13	GH13	GH13	GH13	GH
Prodigal_291|LOCUS_02650	-	GH130_3(58-377)	GH130_e7	3	CW_metabat_CW.96.fa	GWC2-71-9	22	B	GH130	GH130	GH130	GH130	GH
Prodigal_4525|LOCUS_34500	2.4.1.281:5	GH130_1(52-364)	GH130_e6	3	CW_metabat_CW.96.fa	GWC2-71-9	22	B	GH130	GH130	GH130	GH130	GH
Prodigal_1312|LOCUS_11260	-	GH140(31-460)	GH140_e15	3	CW_metabat_CW.96.fa	GWC2-71-9	22	B	GH140	GH140	GH140	GH140	GH
Prodigal_2137|LOCUS_17770	-	GH171(63-419)	GH171_e8	2	CW_metabat_CW.96.fa	GWC2-71-9	22	B		GH171	GH171	GH171	GH
Prodigal_3056|LOCUS_24620	-	GH171(27-391)	GH171_e1	3	CW_metabat_CW.96.fa	GWC2-71-9	22	B	GH171	GH171	GH171	GH171	GH
Prodigal_144|LOCUS_01310	-	GH172(87-315)	GH172_e3	2	CW_metabat_CW.96.fa	GWC2-71-9	22	B		GH172	GH172	GH172	GH
Prodigal_615|LOCUS_05450	-	GH172(290-530)	GH172_e5	3	CW_metabat_CW.96.fa	GWC2-71-9	22	B	GH172	GH172	GH172	GH172	GH
Prodigal_2216|LOCUS_18400	3.2.1.23:2	GH2(29-573)	GH2_e127	3	CW_metabat_CW.96.fa	GWC2-71-9	22	B	GH2	GH2	GH2	GH2	GH	GH2
Prodigal_2910|LOCUS_23560	-	GH2(20-737)	GH2_e124	3	CW_metabat_CW.96.fa	GWC2-71-9	22	B	GH2	GH2	GH2	GH2	GH	GH2
Prodigal_1827|LOCUS_15350	-	GH23(20-137)	GH23_e317	2	CW_metabat_CW.96.fa	GWC2-71-9	22	B		GH23	GH23	GH23	GH
Prodigal_3355|LOCUS_26730	-	GH23(110-209)	GH23_e594	2	CW_metabat_CW.96.fa	GWC2-71-9	22	B		GH23	GH23	GH23	GH
Prodigal_4716|LOCUS_35710	-	GH23(598-729)	GH23_e1000	2	CW_metabat_CW.96.fa	GWC2-71-9	22	B		GH23	GH23	GH23	GH
Prodigal_2971|LOCUS_24000	-	GH28(85-437)	GH28_e102	3	CW_metabat_CW.96.fa	GWC2-71-9	22	B	GH28	GH28	GH28	GH28	GH
Prodigal_81|LOCUS_00750	3.2.1.111:8|3.2.1.51:3|-	GH29(83-394)	GH29_e30+CBM32_e126	3	CW_metabat_CW.96.fa	GWC2-71-9	22	B	GH29	GH29	GH29	GH29	GH
Prodigal_1047|LOCUS_09070	-	GH3(74-315)	GH3_e31	3	CW_metabat_CW.96.fa	GWC2-71-9	22	B	GH3	GH3	GH3	GH3	GH	GH3
Prodigal_1048|LOCUS_09080	3.2.1.21:5|3.2.1.38:1|3.2.1.-:1	GH3(154-405)	GH3_e94	3	CW_metabat_CW.96.fa	GWC2-71-9	22	B	GH3	GH3	GH3	GH3	GH	GH3
Prodigal_2319|LOCUS_19200	-	GH3(119-347)	GH3_e62	3	CW_metabat_CW.96.fa	GWC2-71-9	22	B	GH3	GH3	GH3	GH3	GH	GH3
Prodigal_2729|LOCUS_22210	-	GH3(91-313)	GH3_e7	3	CW_metabat_CW.96.fa	GWC2-71-9	22	B	GH3	GH3	GH3	GH3	GH	GH3
Prodigal_3068|LOCUS_24700	-	GH30(21-486)	GH30_e34	3	CW_metabat_CW.96.fa	GWC2-71-9	22	B	GH0	GH30	GH30	GH30	GH	GH30
Prodigal_3624|LOCUS_28620	-	GH30_1(73-488)	GH30_e1	3	CW_metabat_CW.96.fa	GWC2-71-9	22	B	GH30	GH30	GH30	GH30	GH	GH30
Prodigal_1046|LOCUS_09060	3.2.1.177:2	GH31_4(386-844)	GH31_e87	3	CW_metabat_CW.96.fa	GWC2-71-9	22	B	GH31	GH31	GH31	GH31	GH
Prodigal_1684|LOCUS_14220	-	GH33(51-338)	GH33_e86	3	CW_metabat_CW.96.fa	GWC2-71-9	22	B	GH33	GH33	GH33	GH33	GH
Prodigal_2840|LOCUS_23080	3.2.1.146:1	GH43_34(32-323)	GH43_e147	3	CW_metabat_CW.96.fa	GWC2-71-9	22	B	GH43	GH43	GH43	GH43	GH	GH43
Prodigal_3034|LOCUS_24480	3.2.1.37:2|3.2.1.55:2|-	GH43_12(43-315)+CBM91(342-536)	GH43_e67+CBM91_e28	3	CW_metabat_CW.96.fa	GWC2-71-9	22	B	GH43	GH43	GH43	GH43	GH	GH43
Prodigal_3557|LOCUS_28170	-|-	GH43_28(55-337)+CBM32(377-488)	GH43_e302+CBM32_e188	3	CW_metabat_CW.96.fa	GWC2-71-9	22	B	CBM32	GH43	GH43	GH43	GH	GH43
Prodigal_1314|LOCUS_11280	3.2.1.4:2	GH5_25(60-322)	GH5_e211	3	CW_metabat_CW.96.fa	GWC2-71-9	22	B	GH5	GH5	GH5	GH5	GH	GH5
Prodigal_200|LOCUS_01830	-	GH51_1(232-650)	GH51_e18	3	CW_metabat_CW.96.fa	GWC2-71-9	22	B	GH51	GH51	GH51	GH51	GH	GH51
Prodigal_3639|LOCUS_28700	3.2.1.55:5	GH51_2(201-609)	GH51_e47	3	CW_metabat_CW.96.fa	GWC2-71-9	22	B	GH51	GH51	GH51	GH51	GH	GH51
Prodigal_1529|LOCUS_13030	-	GH53(134-383)	GH53_e4	3	CW_metabat_CW.96.fa	GWC2-71-9	22	B	GH53	GH53	GH53	GH53	GH	GH53
Prodigal_1479|LOCUS_12630	2.4.1.282:1|2.4.1.216:1	GH65(328-737)	GH65_e15	3	CW_metabat_CW.96.fa	GWC2-71-9	22	B	GH65	GH65	GH65	GH65	GH
Prodigal_3360|LOCUS_26780	-	GH84(30-327)	GH84_e11	2	CW_metabat_CW.96.fa	GWC2-71-9	22	B		GH84	GH84	GH84	GH
Prodigal_170|LOCUS_01560	-	GH9(139-610)	GH9_e30	3	CW_metabat_CW.96.fa	GWC2-71-9	22	B	GH9	GH9	GH9	GH9	GH	GH9
Prodigal_4455|LOCUS_34090	-	GH9(138-606)	GH9_e30	3	CW_metabat_CW.96.fa	GWC2-71-9	22	B	GH9	GH9	GH9	GH9	GH	GH9
Prodigal_2143|LOCUS_17810	3.2.1.-:8|3.2.1.113:1|3.2.1.114:1|3.2.1.24:1	GH92(248-742)	GH92_e0	3	CW_metabat_CW.96.fa	GWC2-71-9	22	B	GH92	GH92	GH92	GH92	GH
Prodigal_169|LOCUS_01550	3.2.1.-:3|3.2.1.63:2	GH95(30-791)	GH95_e1	3	CW_metabat_CW.96.fa	GWC2-71-9	22	B	GH95	GH95	GH95	GH95	GH
Prodigal_873|LOCUS_07620	3.2.1.22:1	GH97(28-652)	GH97_e1	3	CW_metabat_CW.96.fa	GWC2-71-9	22	B	GH97	GH97	GH97	GH97	GH
Prodigal_4076|LOCUS_31590	-	PL1_2(136-326)	PL1_e77	3	CW_metabat_CW.96.fa	GWC2-71-9	22	B	PL1	PL1	PL1	PL1	PL	PL1
Prodigal_3212|LOCUS_30170	1.1.3.-:1	AA7(33-457)	AA7_e0	2	P_18661.fna	Halobacteriales (a)	59	E		AA7	AA7	AA7	AA	AA7
Prodigal_3166|LOCUS_29780	-	CBM57(114-286)	CBM57_e33	2	P_18661.fna	Halobacteriales (a)	59	E		CBM57	CBM57	CBM57	CBM
Prodigal_4007|LOCUS_36870	-	CBM9(17-221)	CBM9_e3	2	P_18661.fna	Halobacteriales (a)	59	E		CBM9	CBM9	CBM9	CBM	CBM9
Prodigal_208|LOCUS_02060	-	CE19(42-362)	CE19_e4	2	P_18661.fna	Halobacteriales (a)	59	E		CE19	CE19	CE19	CE	CE19
Prodigal_338|LOCUS_03320	-	CE4(40-148)	CE4_e37	2	P_18661.fna	Halobacteriales (a)	59	E		CE4	CE4	CE4	CE	CE4
Prodigal_1704|LOCUS_16410	3.2.1.14:41|3.2.1.-:2|3.2.1.17:2|3.2.1.132:1	GH18(52-376)	GH18_e66	3	P_18661.fna	Halobacteriales (a)	59	E	GH18	GH18	GH18	GH18	GH
Prodigal_2015|LOCUS_19270	3.2.1.23:1	GH2(16-567)	GH2_e112	3	P_18661.fna	Halobacteriales (a)	59	E	GH2	GH2	GH2	GH2	GH	GH2
Prodigal_2130|LOCUS_20320	-	GH23(51-153)	GH23_e712	2	P_18661.fna	Halobacteriales (a)	59	E		GH23	GH23	GH23	GH
Prodigal_1705|LOCUS_16420	3.2.1.52:8	GH3(81-302)	GH3_e28	3	P_18661.fna	Halobacteriales (a)	59	E	GH3	GH3	GH3	GH3	GH	GH3
Prodigal_2284|LOCUS_21730	3.2.1.37:15|3.2.1.55:3|3.2.1.21:1	GH3(92-316)	GH3_e88	3	P_18661.fna	Halobacteriales (a)	59	E	GH3	GH3	GH3	GH3	GH	GH3
Prodigal_2633|LOCUS_24950	-	GH3(123-348)	GH3_e141	3	P_18661.fna	Halobacteriales (a)	59	E	GH3	GH3	GH3	GH3	GH	GH3
Prodigal_2352|LOCUS_22350	3.2.1.67:6	GH4(26-206)	GH4_e30	3	P_18661.fna	Halobacteriales (a)	59	E	GH4	GH4	GH4	GH4	GH
Prodigal_1239|LOCUS_12010	3.2.1.146:1	GH5_13(63-206)	GH5_e159	3	P_18661.fna	Halobacteriales (a)	59	E	GH5	GH5	GH5	GH5	GH	GH5
Prodigal_2161|LOCUS_20600	3.2.1.146:1	GH5_13(69-212)	GH5_e159	3	P_18661.fna	Halobacteriales (a)	59	E	GH0	GH5	GH5	GH5	GH	GH5
Prodigal_1245|LOCUS_12070	-|-	GH97(74-619)	GH97_e12+CBM35_e79	3	P_18661.fna	Halobacteriales (a)	59	E	CBM35	GH97	GH97	GH97	GH
Prodigal_2047|LOCUS_15770	1.1.3.-:1	AA7(35-459)	AA7_e0	2	P_metabat_P.57.fa	Halobacteriales (b)	57	E		AA7	AA7	AA7	AA	AA7
Prodigal_2928|LOCUS_21680	-	CE19(43-355)	CE19_e1	2	P_metabat_P.57.fa	Halobacteriales (b)	57	E		CE19	CE19	CE19	CE	CE19
Prodigal_1207|LOCUS_09800	-	CE4(44-148)	CE4_e209	2	P_metabat_P.57.fa	Halobacteriales (b)	57	E		CE4	CE4	CE4	CE	CE4
Prodigal_275|LOCUS_02370	-	CE4(96-234)	CE4_e233	2	P_metabat_P.57.fa	Halobacteriales (b)	57	E		CE4	CE4	CE4	CE	CE4
Prodigal_22|LOCUS_00200	-	GH26(123-323)	GH26_e62	2	P_metabat_P.57.fa	Halobacteriales (b)	57	E		GH26	GH26	GH26	GH	GH26
Prodigal_953|LOCUS_07890	-	GH26(145-292)	GH26_e62	2	P_metabat_P.57.fa	Halobacteriales (b)	57	E		GH26	GH26	GH26	GH	GH26
Prodigal_1563|LOCUS_12380	3.2.1.139:12|3.2.1.131:10	GH67(8-687)	GH67_e1	3	P_metabat_P.57.fa	Halobacteriales (b)	57	E	GH67	GH67	GH67	GH67	GH	GH67
Prodigal_1921|LOCUS_14940	3.2.1.139:12|3.2.1.131:10	GH67(8-687)	GH67_e1	3	P_metabat_P.57.fa	Halobacteriales (b)	57	E	GH67	GH67	GH67	GH67	GH	GH67
Prodigal_119|LOCUS_01060	-|-	GH81(81-768)+CBM6(891-1027)	GH81_e7+CBM6_e61	3	P_metabat_P.57.fa	Halobacteriales (b)	57	E	GH81	GH81	GH81	GH81	GH
Prodigal_401|LOCUS_03450	-	PL38(139-354)	PL38_e7	2	P_metabat_P.57.fa	Halobacteriales (b)	57	E		PL38	PL38	PL38	PL
Prodigal_1259|LOCUS_10180	-	PL9(51-363)	PL9_e32	2	P_metabat_P.57.fa	Halobacteriales (b)	57	E		PL9	PL9	PL9	PL
Prodigal_743|LOCUS_07140	-	AA1(67-577)	AA1_e13	2	C_maxbin_C.028.fasta	HGW-15	61	F		AA1	AA1	AA1	AA	AA1
Prodigal_1288|LOCUS_12250	-	AA4(4-238)	AA4_e1	2	C_maxbin_C.028.fasta	HGW-15	61	F		AA4	AA4	AA4	AA	AA4
Prodigal_1356|LOCUS_12880	-	AA4(7-251)	AA4_e1	2	C_maxbin_C.028.fasta	HGW-15	61	F		AA4	AA4	AA4	AA	AA4
Prodigal_184|LOCUS_01780	-	AA4(8-236)	AA4_e1	2	C_maxbin_C.028.fasta	HGW-15	61	F		AA4	AA4	AA4	AA	AA4
Prodigal_1912|LOCUS_18110	-	AA4(5-226)	AA4_e1	2	C_maxbin_C.028.fasta	HGW-15	61	F		AA4	AA4	AA4	AA	AA4
Prodigal_300|LOCUS_02900	1.1.3.38:1	AA4(36-244)	AA4_e0	2	C_maxbin_C.028.fasta	HGW-15	61	F		AA4	AA4	AA4	AA	AA4
Prodigal_2773|LOCUS_25890	-	AA6(2-200)	AA6_e3	2	C_maxbin_C.028.fasta	HGW-15	61	F		AA6	AA6	AA6	AA	AA6
Prodigal_2560|LOCUS_23960	3.1.1.72:1|3.2.1.8:1	CE1(50-303)	CE1_e24	2	C_maxbin_C.028.fasta	HGW-15	61	F		CE1	CE1	CE1	CE	CE1
Prodigal_1017|LOCUS_09750	-	GH171(29-394)	GH171_e17	3	C_maxbin_C.028.fasta	HGW-15	61	F	GH171	GH171	GH171	GH171	GH
Prodigal_153|LOCUS_01470	-	GH23(327-465)	GH23_e638	3	C_maxbin_C.028.fasta	HGW-15	61	F	GH23	GH23	GH23	GH23	GH
Prodigal_1701|LOCUS_16150	3.2.1.17:12|4.2.2.n1:6	GH23(106-222)	GH23_e335	2	C_maxbin_C.028.fasta	HGW-15	61	F		GH23	GH23	GH23	GH
Prodigal_3399|LOCUS_31180	3.2.1.17:12|4.2.2.n1:6	GH23(73-187)	GH23_e335	2	C_maxbin_C.028.fasta	HGW-15	61	F		GH23	GH23	GH23	GH
Prodigal_438|LOCUS_04200	-	GH23(339-478)	GH23_e638	3	C_maxbin_C.028.fasta	HGW-15	61	F	GH23	GH23	GH23	GH23	GH
Prodigal_665|LOCUS_06390	-|-	GH23(234-363)	GH23_e851+CBM50_e974	3	C_maxbin_C.028.fasta	HGW-15	61	F	CBM50	GH23	GH23	GH23	GH
Prodigal_915|LOCUS_08760	-|-	GH23(87-202)	GH23_e710+CBM50_e717	3	C_maxbin_C.028.fasta	HGW-15	61	F	CBM50	GH23	GH23	GH23	GH
Prodigal_1054|LOCUS_10080	-	GH3(69-294)	GH3_e205	2	C_maxbin_C.028.fasta	HGW-15	61	F		GH3	GH3	GH3	GH	GH3
Prodigal_1832|LOCUS_17400	3.2.1.1:1	GH57(40-334)	GH57_e36	3	C_maxbin_C.028.fasta	HGW-15	61	F	GH57	GH57	GH57	GH57	GH
Prodigal_1828|LOCUS_17360	-	GH77(10-493)	GH77_e17	3	C_maxbin_C.028.fasta	HGW-15	61	F	GH77	GH77	GH77	GH77	GH
Prodigal_111|LOCUS_00890	-	CE4(56-175)	CE4_e265	2	maxbin_P.091.fasta	HXMU1428-3	47	E		CE4	CE4	CE4	CE	CE4
Prodigal_202|LOCUS_01630	-	GH103(34-239)	GH103_e35	2	maxbin_P.091.fasta	HXMU1428-3	47	E		GH103	GH103	GH103	GH
Prodigal_812|LOCUS_05960	-	GH113(84-369)	GH113_e24	2	maxbin_P.091.fasta	HXMU1428-3	47	E		GH113	GH113	GH113	GH
Prodigal_1281|LOCUS_08610	-	GH3(98-319)	GH3_e193	2	maxbin_P.091.fasta	HXMU1428-3	47	E		GH3	GH3	GH3	GH	GH3
Prodigal_456|LOCUS_04350	-	AA4(42-235)	AA4_e1	2	P_25546.fna	Hyphomicrobiaceae	65	F		AA4	AA4	AA4	AA	AA4
Prodigal_282|LOCUS_02710	-|-	-	CBM50_e396+CBM50_e396	2	P_25546.fna	Hyphomicrobiaceae	65	F	CBM50		CBM50	CBM50	CBM
Prodigal_44|LOCUS_00420	-	CE11(10-281)	CE11_e11	3	P_25546.fna	Hyphomicrobiaceae	65	F	CE11	CE11	CE11	CE11	CE	CE11
Prodigal_1242|LOCUS_11700	-	CE4(82-198)	CE4_e265	2	P_25546.fna	Hyphomicrobiaceae	65	F		CE4	CE4	CE4	CE	CE4
Prodigal_1646|LOCUS_15440	-	CE4(64-187)	CE4_e299	2	P_25546.fna	Hyphomicrobiaceae	65	F		CE4	CE4	CE4	CE	CE4
Prodigal_1647|LOCUS_15450	-	CE4(68-186)	CE4_e265	2	P_25546.fna	Hyphomicrobiaceae	65	F		CE4	CE4	CE4	CE	CE4
Prodigal_1868|LOCUS_17490	-	CE4(82-200)	CE4_e265	2	P_25546.fna	Hyphomicrobiaceae	65	F		CE4	CE4	CE4	CE	CE4
Prodigal_590|LOCUS_05600	-	CE4(68-184)	CE4_e265	2	P_25546.fna	Hyphomicrobiaceae	65	F		CE4	CE4	CE4	CE	CE4
Prodigal_591|LOCUS_05610	-	CE4(62-185)	CE4_e299	2	P_25546.fna	Hyphomicrobiaceae	65	F		CE4	CE4	CE4	CE	CE4
Prodigal_526|LOCUS_05000	-	GH102(147-303)	GH102_e28	3	P_25546.fna	Hyphomicrobiaceae	65	F	GH102	GH102	GH102	GH102	GH	GH102
Prodigal_811|LOCUS_07690	-	GH102(147-303)	GH102_e28	3	P_25546.fna	Hyphomicrobiaceae	65	F	GH102	GH102	GH102	GH102	GH	GH102
Prodigal_1010|LOCUS_09570	-	GH103(104-397)	GH103_e17	3	P_25546.fna	Hyphomicrobiaceae	65	F	GH103	GH103	GH103	GH103	GH
Prodigal_1165|LOCUS_10990	-	GH103(39-343)	GH103_e19	3	P_25546.fna	Hyphomicrobiaceae	65	F	GH103	GH103	GH103	GH103	GH
Prodigal_1765|LOCUS_16550	-	GH103(48-352)	GH103_e19	3	P_25546.fna	Hyphomicrobiaceae	65	F	GH103	GH103	GH103	GH103	GH
Prodigal_2141|LOCUS_19990	-	GH15(227-588)	GH15_e57	3	P_25546.fna	Hyphomicrobiaceae	65	F	GH15	GH15	GH15	GH15	GH
Prodigal_36|LOCUS_00360	-	GH15(227-589)	GH15_e57	3	P_25546.fna	Hyphomicrobiaceae	65	F	GH15	GH15	GH15	GH15	GH
Prodigal_375|LOCUS_03590	3.2.1.28:6	GH15(227-601)	GH15_e22	3	P_25546.fna	Hyphomicrobiaceae	65	F	GH15	GH15	GH15	GH15	GH
Prodigal_1442|LOCUS_13550	-	GH23(562-693)	GH23_e439	3	P_25546.fna	Hyphomicrobiaceae	65	F	GH23	GH23	GH23	GH23	GH
Prodigal_892|LOCUS_08460	-	GH3(91-312)	GH3_e228	3	P_25546.fna	Hyphomicrobiaceae	65	F	GH3	GH3	GH3	GH3	GH	GH3
Prodigal_1135|LOCUS_10710	-	-	GH73_e115	2	P_25546.fna	Hyphomicrobiaceae	65	F	GH73		GH73	GH73	GH
Prodigal_1715|LOCUS_16070	-	-	GH73_e115	2	P_25546.fna	Hyphomicrobiaceae	65	F	GH73		GH73	GH73	GH
Prodigal_468|LOCUS_04460	-	PL14(102-251)	PL14_e13	2	P_25546.fna	Hyphomicrobiaceae	65	F		PL14	PL14	PL14	PL
Prodigal_465|LOCUS_04470	1.10.3.2:1	AA1(56-465)	AA1_e26	2	C_metabat_C.95.fa	J153	53	E		AA1	AA1	AA1	AA	AA1
Prodigal_488|LOCUS_04700	-	AA3_2(11-537)	AA3_e57	3	C_metabat_C.95.fa	J153	53	E	AA3	AA3	AA3	AA3	AA	AA3
Prodigal_3840|LOCUS_34120	-	CE4(91-237)	CE4_e131	2	C_metabat_C.95.fa	J153	53	E		CE4	CE4	CE4	CE	CE4
Prodigal_535|LOCUS_05150	-	CE4(122-250)	CE4_e29	2	C_metabat_C.95.fa	J153	53	E		CE4	CE4	CE4	CE	CE4
Prodigal_3710|LOCUS_33210	3.5.1.41:1	-	CE4_e177	2	C_metabat_C.95.fa	J153	53	E	CE4		CE4	CE4	CE	CE4
Prodigal_2758|LOCUS_25590	-	GH103(46-339)	GH103_e38	3	C_metabat_C.95.fa	J153	53	E	GH103	GH103	GH103	GH103	GH
Prodigal_2766|LOCUS_25650	-	GH103(37-341)	GH103_e19	3	C_metabat_C.95.fa	J153	53	E	GH103	GH103	GH103	GH103	GH
Prodigal_2487|LOCUS_23260	-	GH15(220-583)	GH15_e57	3	C_metabat_C.95.fa	J153	53	E	GH15	GH15	GH15	GH15	GH
Prodigal_1723|LOCUS_16330	-	GH23(510-644)	GH23_e341	3	C_metabat_C.95.fa	J153	53	E	GH23	GH23	GH23	GH23	GH
Prodigal_786|LOCUS_07540	-	GH23(468-594)	GH23_e690	3	C_metabat_C.95.fa	J153	53	E	GH23	GH23	GH23	GH23	GH
Prodigal_2269|LOCUS_21300	-	GH3(63-282)	GH3_e228	3	C_metabat_C.95.fa	J153	53	E	GH3	GH3	GH3	GH3	GH	GH3
Prodigal_301|LOCUS_02890	-	GH33(9-299)	GH33_e86	3	C_metabat_C.95.fa	J153	53	E	GH33	GH33	GH33	GH33	GH
Prodigal_3474|LOCUS_29140	-	AA6(4-193)	AA6_e2	2	C_metabat_C.46.fa	JABDQX01	11	B		AA6	AA6	AA6	AA	AA6
Prodigal_2920|LOCUS_25050	1.1.3.-:1	AA7(43-471)	AA7_e0	2	C_metabat_C.46.fa	JABDQX01	11	B		AA7	AA7	AA7	AA	AA7
Prodigal_926|LOCUS_08460	3.2.1.1:1|-	CBM26(4-73)+GH13_42(323-730)	CBM26_e1+GH13_e69	3	C_metabat_C.46.fa	JABDQX01	11	B	CBM26	CBM26	CBM26	CBM26	CBM	CBM26
Prodigal_2074|LOCUS_18380	3.2.1.68:75|2.4.1.25:4|3.2.1.-:1|3.2.1.68:15|3.2.1.-:1	GH13_11(191-548)	CBM48_e3+GH13_e48	3	C_metabat_C.46.fa	JABDQX01	11	B	CBM48	GH13	CBM48	CBM48	CBM
Prodigal_212|LOCUS_02020	3.2.1.68:75|2.4.1.25:4|3.2.1.-:1|3.2.1.68:15|3.2.1.-:1	CBM48(15-107)+GH13_11(186-535)	CBM48_e3+GH13_e48	3	C_metabat_C.46.fa	JABDQX01	11	B	CBM48	CBM48	CBM48	CBM48	CBM
Prodigal_2077|LOCUS_18400	3.5.1.108:18	CE11(4-275)	CE11_e22	3	C_metabat_C.46.fa	JABDQX01	11	B	CE11	CE11	CE11	CE11	CE	CE11
Prodigal_145|LOCUS_01380	-	CE14(27-134)	CE14_e45	2	C_metabat_C.46.fa	JABDQX01	11	B		CE14	CE14	CE14	CE	CE14
Prodigal_2470|LOCUS_21600	-	CE16(35-298)	CE16_e2	2	C_metabat_C.46.fa	JABDQX01	11	B		CE16	CE16	CE16	CE	CE16
Prodigal_833|LOCUS_07630	3.1.1.6:1	CE16(48-338)	CE16_e0	2	C_metabat_C.46.fa	JABDQX01	11	B		CE16	CE16	CE16	CE	CE16
Prodigal_2514|LOCUS_21970	-	CE4(47-157)	CE4_e21	2	C_metabat_C.46.fa	JABDQX01	11	B		CE4	CE4	CE4	CE	CE4
Prodigal_157|LOCUS_01500	-	GH103(77-363)	GH103_e12	2	C_metabat_C.46.fa	JABDQX01	11	B		GH103	GH103	GH103	GH
Prodigal_3|LOCUS_00020	-	GH103(39-333)	GH103_e38	3	C_metabat_C.46.fa	JABDQX01	11	B	GH103	GH103	GH103	GH103	GH
Prodigal_1802|LOCUS_16160	-	GH57(160-519)	GH119_e1	3	C_metabat_C.46.fa	JABDQX01	11	B	GH119	GH57	GH119	GH119	GH
Prodigal_1954|LOCUS_17390	2.4.1.4:1	GH13_4(115-509)	GH13_e129	3	C_metabat_C.46.fa	JABDQX01	11	B	GH13	GH13	GH13	GH13	GH
Prodigal_2992|LOCUS_25570	-	GH13_3(244-465)	GH13_e41	3	C_metabat_C.46.fa	JABDQX01	11	B	GH13	GH13	GH13	GH13	GH
Prodigal_343|LOCUS_03220	-|-	GH13_14(168-452)	CBM48_e38+GH13_e228	3	C_metabat_C.46.fa	JABDQX01	11	B	GH13	GH13	CBM48	GH13	GH
Prodigal_577|LOCUS_05300	5.4.99.16:7	GH13_16(40-393)	GH13_e0	3	C_metabat_C.46.fa	JABDQX01	11	B	GH13	GH13	GH13	GH13	GH
Prodigal_927|LOCUS_08470	3.2.1.1:3	GH13_5(32-367)	GH13_e25	3	C_metabat_C.46.fa	JABDQX01	11	B	GH13	GH13	GH13	GH13	GH
Prodigal_1186|LOCUS_10810	-	GH171(26-408)	GH171_e1	3	C_metabat_C.46.fa	JABDQX01	11	B	GH171	GH171	GH171	GH171	GH
Prodigal_1063|LOCUS_09700	-	GH23(97-207)	GH23_e62	2	C_metabat_C.46.fa	JABDQX01	11	B		GH23	GH23	GH23	GH
Prodigal_1161|LOCUS_10580	-|-|-|-	GH23(140-282)	GH23_e418+CBM50_e956+CBM50_e668+CBM50_e461	3	C_metabat_C.46.fa	JABDQX01	11	B	CBM50	GH23	GH23	GH23	GH
Prodigal_4215|LOCUS_34200	3.2.1.52:1	GH3(60-283)	GH3_e78	3	C_metabat_C.46.fa	JABDQX01	11	B	GH3	GH3	GH3	GH3	GH	GH3
Prodigal_342|LOCUS_03210	-	GH31_1(247-683)	GH31_e34	3	C_metabat_C.46.fa	JABDQX01	11	B	GH31	GH31	GH31	GH31	GH
Prodigal_1927|LOCUS_17180	3.2.1.1:3|2.4.1.18:1	GH57(7-427)	GH57_e30	3	C_metabat_C.46.fa	JABDQX01	11	B	GH57	GH57	GH57	GH57	GH
Prodigal_671|LOCUS_06190	-	GH57(10-487)	GH57_e28	3	C_metabat_C.46.fa	JABDQX01	11	B	GH57	GH57	GH57	GH57	GH
Prodigal_4145|LOCUS_33720	-	GH73(166-304)	GH73_e260	2	C_metabat_C.46.fa	JABDQX01	11	B		GH73	GH73	GH73	GH
Prodigal_672|LOCUS_06200	2.4.1.25:21	GH77(15-487)	GH77_e26	3	C_metabat_C.46.fa	JABDQX01	11	B	GH77	GH77	GH77	GH77	GH
Prodigal_974|LOCUS_09020	2.4.1.18:57|2.4.1.18:14	CBM48(40-128)+GH13_9(196-496)	CBM48_e2+GH13_e200	3	CW_metabat_CW.95.fa	JACQBZ02	41	E	CBM48	CBM48	CBM48	CBM48	CBM
Prodigal_975|LOCUS_09030	3.2.1.68:75|2.4.1.25:4|3.2.1.-:1|3.2.1.68:15|3.2.1.-:1	CBM48(10-102)+GH13_11(182-533)	CBM48_e3+GH13_e48	3	CW_metabat_CW.95.fa	JACQBZ02	41	E	CBM48	CBM48	CBM48	CBM48	CBM
Prodigal_976|LOCUS_09040	3.2.1.141:34|3.2.1.1:4|-	GH13_10(95-409)	CBM48_e0+GH13_e127	3	CW_metabat_CW.95.fa	JACQBZ02	41	E	CBM48	GH13	CBM48	CBM48	CBM
Prodigal_859|LOCUS_07970	-|-|-	CBM67(50-195)+CBM67(217-355)+GT83(565-859)	CBM67_e12+CBM67_e12+GT83_e69	2	CW_metabat_CW.95.fa	JACQBZ02	41	E		CBM67	CBM67	CBM67	CBM
Prodigal_2295|LOCUS_19670	-	CE14(4-107)	CE14_e40	2	CW_metabat_CW.95.fa	JACQBZ02	41	E		CE14	CE14	CE14	CE	CE14
Prodigal_218|LOCUS_02080	-	CE4(85-205)	CE4_e261	2	CW_metabat_CW.95.fa	JACQBZ02	41	E		CE4	CE4	CE4	CE	CE4
Prodigal_1349|LOCUS_12360	-	GH103(59-353)	GH103_e12	2	CW_metabat_CW.95.fa	JACQBZ02	41	E		GH103	GH103	GH103	GH
Prodigal_1882|LOCUS_16690	-	GH109(5-150)	GH109_e7	2	CW_metabat_CW.95.fa	JACQBZ02	41	E		GH109	GH109	GH109	GH
Prodigal_925|LOCUS_08590	-	GH109(2-147)	GH109_e7	2	CW_metabat_CW.95.fa	JACQBZ02	41	E		GH109	GH109	GH109	GH
Prodigal_972|LOCUS_09000	-	GH13_3(103-323)	GH13_e41	3	CW_metabat_CW.95.fa	JACQBZ02	41	E	GH13	GH13	GH13	GH13	GH
Prodigal_973|LOCUS_09010	5.4.99.16:7	GH13_16(39-392)	GH13_e0	3	CW_metabat_CW.95.fa	JACQBZ02	41	E	GH13	GH13	GH13	GH13	GH
Prodigal_1319|LOCUS_12110	-|-	GH23(138-282)	GH23_e598+CBM50_e914	2	CW_metabat_CW.95.fa	JACQBZ02	41	E		GH23	GH23	GH23	GH
Prodigal_180|LOCUS_01730	-	GH23(299-447)	GH23_e824	3	CW_metabat_CW.95.fa	JACQBZ02	41	E	GH23	GH23	GH23	GH23	GH
Prodigal_796|LOCUS_07420	-	GH23(84-196)	GH23_e949	2	CW_metabat_CW.95.fa	JACQBZ02	41	E		GH23	GH23	GH23	GH
Prodigal_849|LOCUS_07890	-	GH23(79-195)	GH23_e958	2	CW_metabat_CW.95.fa	JACQBZ02	41	E		GH23	GH23	GH23	GH
Prodigal_1369|LOCUS_12540	-	GH3(62-282)	GH3_e44	2	CW_metabat_CW.95.fa	JACQBZ02	41	E		GH3	GH3	GH3	GH	GH3
Prodigal_1220|LOCUS_11910	-	AA3_2(2-522)	AA3_e57	3	P_25897.fna	JAENVV01	56	E	AA3	AA3	AA3	AA3	AA	AA3
Prodigal_1265|LOCUS_12330	1.1.3.-:1	AA7(37-228)	AA7_e0	2	P_25897.fna	JAENVV01	56	E		AA7	AA7	AA7	AA	AA7
Prodigal_826|LOCUS_08100	1.1.3.-:1	AA7(42-471)	AA7_e0	2	P_25897.fna	JAENVV01	56	E		AA7	AA7	AA7	AA	AA7
Prodigal_1027|LOCUS_10050	-	CE14(24-139)	CE14_e46	2	P_25897.fna	JAENVV01	56	E		CE14	CE14	CE14	CE	CE14
Prodigal_105|LOCUS_01030	3.5.1.89:6	CE14(5-137)	CE14_e2	2	P_25897.fna	JAENVV01	56	E		CE14	CE14	CE14	CE	CE14
Prodigal_135|LOCUS_01320	-	CE4(78-200)	CE4_e274	2	P_25897.fna	JAENVV01	56	E		CE4	CE4	CE4	CE	CE4
Prodigal_2909|LOCUS_27430	-	CE4(74-203)	CE4_e274	2	P_25897.fna	JAENVV01	56	E		CE4	CE4	CE4	CE	CE4
Prodigal_1875|LOCUS_18110	-	CE9(21-366)	CE9_e18	2	P_25897.fna	JAENVV01	56	E		CE9	CE9	CE9	CE	CE9
Prodigal_283|LOCUS_02760	3.2.1.21:51|3.2.1.38:2|3.2.1.-:1	GH1(3-437)	GH1_e107	3	P_25897.fna	JAENVV01	56	E	GH1	GH1	GH1	GH1	GH	GH1
Prodigal_1336|LOCUS_13030	3.2.1.54:7|3.2.1.133:3|3.2.1.135:2	GH13_20(174-505)	GH13_e225	3	P_25897.fna	JAENVV01	56	E	GH13	GH13	GH13	GH13	GH
Prodigal_1737|LOCUS_16800	5.4.99.16:7	GH13_16(36-389)	GH13_e0	3	P_25897.fna	JAENVV01	56	E	GH13	GH13	GH13	GH13	GH
Prodigal_1741|LOCUS_16840	3.2.1.20:1|3.2.1.10:1	GH13_23(19-361)	GH13_e182	3	P_25897.fna	JAENVV01	56	E	GH13	GH13	GH13	GH13	GH
Prodigal_2950|LOCUS_27770	3.2.1.20:1|3.2.1.10:1	GH13_23(38-378)	GH13_e182	3	P_25897.fna	JAENVV01	56	E	GH13	GH13	GH13	GH13	GH
Prodigal_3011|LOCUS_28200	3.2.1.41:1|3.2.1.135:1	GH13_20(76-393)	GH13_e157	3	P_25897.fna	JAENVV01	56	E	GH13	GH13	GH13	GH13	GH
Prodigal_359|LOCUS_03510	3.2.1.41:10|3.2.1.1:3|3.2.1.68:1	GH13(48-425)	GH13_e183	3	P_25897.fna	JAENVV01	56	E	CBM48	GH13	GH13	GH13	GH
Prodigal_399|LOCUS_03900	2.4.1.352:2	GH13_18(80-416)	GH13_e137	3	P_25897.fna	JAENVV01	56	E	GH13	GH13	GH13	GH13	GH
Prodigal_808|LOCUS_07920	3.2.1.41:1|3.2.1.135:1	GH13_20(49-364)	GH13_e157	3	P_25897.fna	JAENVV01	56	E	GH13	GH13	GH13	GH13	GH
Prodigal_1465|LOCUS_14260	-	GH32(18-245)	GH32_e73	2	P_25897.fna	JAENVV01	56	E		GH32	GH32	GH32	GH
Prodigal_1738|LOCUS_16810	2.4.1.282:1|2.4.1.216:1	GH65(318-728)	GH65_e15	3	P_25897.fna	JAENVV01	56	E	GH65	GH65	GH65	GH65	GH
Prodigal_830|LOCUS_08140	2.4.1.25:21	GH77(11-485)	GH77_e26	3	P_25897.fna	JAENVV01	56	E	GH77	GH77	GH77	GH77	GH
Prodigal_1283|LOCUS_10590	3.2.1.68:75|2.4.1.25:4|3.2.1.-:1|3.2.1.68:15|3.2.1.-:1	CBM48(10-98)+GH13_11(177-529)	CBM48_e3+GH13_e48	3	LW_metabat_LW.102.fa	JAFGWO01	71	F	CBM48	CBM48	CBM48	CBM48	CBM
Prodigal_597|LOCUS_05180	3.2.1.68:75|2.4.1.25:4|3.2.1.-:1|3.2.1.68:15|3.2.1.-:1	GH13_11(176-529)	CBM48_e3+GH13_e48	3	LW_metabat_LW.102.fa	JAFGWO01	71	F	CBM48	GH13	CBM48	CBM48	CBM
Prodigal_1055|LOCUS_08940	3.5.1.108:18	CE11(16-285)	CE11_e22	2	LW_metabat_LW.102.fa	JAFGWO01	71	F		CE11	CE11	CE11	CE	CE11
Prodigal_1589|LOCUS_12650	-	GH102(154-310)	GH102_e26	3	LW_metabat_LW.102.fa	JAFGWO01	71	F	GH102	GH102	GH102	GH102	GH	GH102
Prodigal_1382|LOCUS_11300	3.5.1.-:1|3.2.1.-:1	GH153(96-372)	GH153_e0	2	LW_metabat_LW.102.fa	JAFGWO01	71	F		GH153	GH153	GH153	GH
Prodigal_1286|LOCUS_10600	-	GH23(256-407)	GH23_e170	3	LW_metabat_LW.102.fa	JAFGWO01	71	F	GH23	GH23	GH23	GH23	GH
Prodigal_1350|LOCUS_11050	-	GH23(121-257)	GH23_e516	2	LW_metabat_LW.102.fa	JAFGWO01	71	F		GH23	GH23	GH23	GH
Prodigal_48|LOCUS_00460	-	GH57(2-440)	GH57_e7	3	LW_metabat_LW.102.fa	JAFGWO01	71	F	GH57	GH57	GH57	GH57	GH
Prodigal_49|LOCUS_00470	-	GH57(18-286)	GH57_e22	3	LW_metabat_LW.102.fa	JAFGWO01	71	F	GH57	GH57	GH57	GH57	GH
Prodigal_53|LOCUS_00510	3.2.1.1:3|2.4.1.18:1	GH57(8-436)	GH57_e30	3	LW_metabat_LW.102.fa	JAFGWO01	71	F	GH57	GH57	GH57	GH57	GH
Prodigal_393|LOCUS_03500	-	GH77(10-488)	GH77_e17	3	LW_metabat_LW.102.fa	JAFGWO01	71	F	GH77	GH77	GH77	GH77	GH
Prodigal_3248|LOCUS_25070	1.1.3.-:1	AA7(43-471)	AA7_e0	2	L_metabat_L.102.fa	Jiangellales	72	F		AA7	AA7	AA7	AA	AA7
Prodigal_917|LOCUS_08030	3.2.1.68:75|2.4.1.25:4|3.2.1.-:1|3.2.1.68:15|3.2.1.-:1	CBM48(18-107)+GH13_11(190-542)	CBM48_e3+GH13_e48	3	L_metabat_L.102.fa	Jiangellales	72	F	CBM48	CBM48	CBM48	CBM48	CBM
Prodigal_3225|LOCUS_24950	-	-	CBM50_e216	2	L_metabat_L.102.fa	Jiangellales	72	F	CBM50		CBM50	CBM50	CBM
Prodigal_2960|LOCUS_23310	-	CE14(16-123)	CE14_e39	2	L_metabat_L.102.fa	Jiangellales	72	F		CE14	CE14	CE14	CE	CE14
Prodigal_680|LOCUS_06080	3.5.1.115:3	CE14(46-180)	CE14_e1	3	L_metabat_L.102.fa	Jiangellales	72	F	CE14	CE14	CE14	CE14	CE	CE14
Prodigal_2696|LOCUS_21520	-	CE4(95-222)	CE4_e274	2	L_metabat_L.102.fa	Jiangellales	72	F		CE4	CE4	CE4	CE	CE4
Prodigal_1267|LOCUS_10890	3.5.1.25:3	CE9(28-388)	CE9_e105	2	L_metabat_L.102.fa	Jiangellales	72	F		CE9	CE9	CE9	CE	CE9
Prodigal_2699|LOCUS_21530	3.2.1.21:71|3.2.1.-:11|3.2.1.38:3|3.2.1.23:2|3.2.1.74:1	GH1(8-450)	GH1_e113	3	L_metabat_L.102.fa	Jiangellales	72	F	GH1	GH1	GH1	GH1	GH	GH1
Prodigal_2798|LOCUS_22220	5.4.99.16:7	GH13_16(69-424)	GH13_e0	3	L_metabat_L.102.fa	Jiangellales	72	F	GH13	GH13	GH13	GH13	GH
Prodigal_295|LOCUS_02730	2.4.1.329:1	GH13_18(347-505)+GH13_18(547-759)	GH13_e104	3	L_metabat_L.102.fa	Jiangellales	72	F	GH13	GH13	GH13	GH13	GH
Prodigal_3304|LOCUS_25450	2.4.1.7:2	GH13_18(33-379)	GH13_e144	3	L_metabat_L.102.fa	Jiangellales	72	F	GH13	GH13	GH13	GH13	GH
Prodigal_831|LOCUS_07320	3.2.1.20:2	GH13_30(27-392)	GH13_e234	3	L_metabat_L.102.fa	Jiangellales	72	F	GH13	GH13	GH13	GH13	GH
Prodigal_918|LOCUS_08040	-	GH13_3(231-450)	GH13_e41	3	L_metabat_L.102.fa	Jiangellales	72	F	GH13	GH13	GH13	GH13	GH
Prodigal_272|LOCUS_02510	-	GH140(73-477)	GH140_e6	2	L_metabat_L.102.fa	Jiangellales	72	F		GH140	GH140	GH140	GH
Prodigal_2736|LOCUS_21770	-	GH176(241-638)	-	2	L_metabat_L.102.fa	Jiangellales	72	F	GH176	GH176		GH176	GH
Prodigal_1717|LOCUS_14410	3.2.1.23:41	GH2(40-916)	GH2_e92	3	L_metabat_L.102.fa	Jiangellales	72	F	GH2	GH2	GH2	GH2	GH	GH2
Prodigal_452|LOCUS_04110	-	GH23(227-362)	GH23_e398	2	L_metabat_L.102.fa	Jiangellales	72	F		GH23	GH23	GH23	GH
Prodigal_2598|LOCUS_20830	3.2.1.21:22|3.2.1.-:4|3.2.1.37:1|3.2.1.55:1|3.2.1.23:1|3.2.1.45:1	GH3(42-257)	GH3_e197	3	L_metabat_L.102.fa	Jiangellales	72	F	GH3	GH3	GH3	GH3	GH	GH3
Prodigal_2528|LOCUS_20330	-	GH31_13(291-735)	GH31_e49	3	L_metabat_L.102.fa	Jiangellales	72	F	GH31	GH31	GH31	GH31	GH
Prodigal_2306|LOCUS_18780	-	GH5_13(49-332)	GH5_e234	3	L_metabat_L.102.fa	Jiangellales	72	F	GH5	GH5	GH5	GH5	GH	GH5
Prodigal_1247|LOCUS_10740	-	GH57(10-393)	GH57_e20	3	L_metabat_L.102.fa	Jiangellales	72	F	GH57	GH57	GH57	GH57	GH
Prodigal_943|LOCUS_08250	2.4.1.282:1|2.4.1.216:1	GH65(317-727)	GH65_e15	3	L_metabat_L.102.fa	Jiangellales	72	F	GH65	GH65	GH65	GH65	GH
Prodigal_2311|LOCUS_18820	2.4.1.25:4	GH77(179-678)	GH77_e2	3	L_metabat_L.102.fa	Jiangellales	72	F	GH77	GH77	GH77	GH77	GH
Prodigal_854|LOCUS_07490	2.4.1.25:21	GH77(10-491)	GH77_e26	3	L_metabat_L.102.fa	Jiangellales	72	F	GH77	GH77	GH77	GH77	GH
Prodigal_578|LOCUS_04700	2.4.1.18:57|2.4.1.18:57|2.4.1.18:14	CBM48(157-244)+GH13_9(312-612)	CBM48_e2+CBM48_e2+GH13_e200	3	maxbin_LW.269.fasta	Lacipirellulaceae	45	E	CBM48	CBM48	CBM48	CBM48	CBM
Prodigal_3875|LOCUS_23290	-	CBM51(66-204)	CBM51_e47	2	maxbin_LW.269.fasta	Lacipirellulaceae	45	E		CBM51	CBM51	CBM51	CBM	CBM51
Prodigal_126|LOCUS_01050	-|3.2.1.40:1|3.2.1.40:1	CBM67(168-314)+CBM67(328-488)+GH78(515-1023)	CBM67_e9+CBM67_e28+GH78_e24	3	maxbin_LW.269.fasta	Lacipirellulaceae	45	E	CBM67	CBM67	CBM67	CBM67	CBM
Prodigal_2430|LOCUS_17020	-|-	CE12(40-260)+CE12(447-630)	CE12_e17+CE12_e31	3	maxbin_LW.269.fasta	Lacipirellulaceae	45	E	CE12	CE12	CE12	CE12	CE	CE12
Prodigal_2108|LOCUS_15280	-	CE14(16-115)	CE14_e58	2	maxbin_LW.269.fasta	Lacipirellulaceae	45	E		CE14	CE14	CE14	CE	CE14
Prodigal_3522|LOCUS_21950	-	CE16(27-291)	CE16_e2	2	maxbin_LW.269.fasta	Lacipirellulaceae	45	E		CE16	CE16	CE16	CE	CE16
Prodigal_1146|LOCUS_08980	-	GH10(191-475)	GH10_e89	3	maxbin_LW.269.fasta	Lacipirellulaceae	45	E	GH0	GH10	GH10	GH10	GH	GH10
Prodigal_142|LOCUS_01170	3.2.1.40:1	GH106(390-1156)	GH106_e44	3	maxbin_LW.269.fasta	Lacipirellulaceae	45	E	GH106	GH106	GH106	GH106	GH
Prodigal_1361|LOCUS_10430	-	GH109(2-299)	GH109_e7	2	maxbin_LW.269.fasta	Lacipirellulaceae	45	E		GH109	GH109	GH109	GH
Prodigal_3852|LOCUS_23200	-	GH109(2-149)	GH109_e2	2	maxbin_LW.269.fasta	Lacipirellulaceae	45	E		GH109	GH109	GH109	GH
Prodigal_110|LOCUS_00910	-|-	GH13_10(151-352)	CBM48_e87+GH13_e213	3	maxbin_LW.269.fasta	Lacipirellulaceae	45	E	GH13	GH13	CBM48	GH13	GH
Prodigal_20|LOCUS_00180	3.2.1.1:3|3.2.1.98:1	GH13_7(67-449)	GH13_e160	3	maxbin_LW.269.fasta	Lacipirellulaceae	45	E	GH0	GH13	GH13	GH13	GH
Prodigal_141|LOCUS_01160	3.2.1.31:1|3.2.1.185:1	GH137(35-358)	GH137_e0	3	maxbin_LW.269.fasta	Lacipirellulaceae	45	E	GH137	GH137	GH137	GH137	GH
Prodigal_922|LOCUS_07370	-	GH159(65-305)	GH159_e7	2	maxbin_LW.269.fasta	Lacipirellulaceae	45	E		GH159	GH159	GH159	GH
Prodigal_833|LOCUS_06670	-	GH16_3(32-274)	GH16_e210	2	maxbin_LW.269.fasta	Lacipirellulaceae	45	E		GH16	GH16	GH16	GH	GH16
Prodigal_1110|LOCUS_08760	-	GH18(50-374)	GH18_e254	2	maxbin_LW.269.fasta	Lacipirellulaceae	45	E		GH18	GH18	GH18	GH
Prodigal_143|LOCUS_01180	-	GH2(9-528)	GH2_e31	3	maxbin_LW.269.fasta	Lacipirellulaceae	45	E	GH2	GH2	GH2	GH2	GH	GH2
Prodigal_161|LOCUS_01320	3.2.1.23:2	GH2(39-568)	GH2_e127	3	maxbin_LW.269.fasta	Lacipirellulaceae	45	E	GH2	GH2	GH2	GH2	GH	GH2
Prodigal_1537|LOCUS_11600	-	GH28(78-431)	GH28_e80	3	maxbin_LW.269.fasta	Lacipirellulaceae	45	E	GH28	GH28	GH28	GH28	GH
Prodigal_2593|LOCUS_17800	-	GH28(54-407)	GH28_e42	3	maxbin_LW.269.fasta	Lacipirellulaceae	45	E	GH28	GH28	GH28	GH28	GH
Prodigal_686|LOCUS_05540	3.2.1.67:1	GH28(87-446)	GH28_e133	3	maxbin_LW.269.fasta	Lacipirellulaceae	45	E	GH28	GH28	GH28	GH28	GH
Prodigal_447|LOCUS_03680	3.2.1.63:1|3.2.1.51:1	GH29(28-375)	GH29_e63	3	maxbin_LW.269.fasta	Lacipirellulaceae	45	E	GH29	GH29	GH29	GH29	GH
Prodigal_1632|LOCUS_12230	-	GH3(70-302)	GH3_e118	3	maxbin_LW.269.fasta	Lacipirellulaceae	45	E	GH3	GH3	GH3	GH3	GH	GH3
Prodigal_252|LOCUS_02060	-	GH33(24-316)	GH33_e86	3	maxbin_LW.269.fasta	Lacipirellulaceae	45	E	GH33	GH33	GH33	GH33	GH
Prodigal_276|LOCUS_02260	-	GH35(13-187)	GH35_e44	3	maxbin_LW.269.fasta	Lacipirellulaceae	45	E	GH35	GH35	GH35	GH35	GH
Prodigal_111|LOCUS_00920	-	GH43_5(29-328)	GH43_e266	2	maxbin_LW.269.fasta	Lacipirellulaceae	45	E		GH43	GH43	GH43	GH	GH43
Prodigal_1891|LOCUS_13920	-|-	GH43_10(28-296)+CBM91(324-516)	GH43_e101+CBM91_e51	3	maxbin_LW.269.fasta	Lacipirellulaceae	45	E	GH43	GH43	GH43	GH43	GH	GH43
Prodigal_1991|LOCUS_14580	-	GH43_18(72-322)	GH43_e233	3	maxbin_LW.269.fasta	Lacipirellulaceae	45	E	GH43	GH43	GH43	GH43	GH	GH43
Prodigal_2242|LOCUS_16070	3.2.1.55:2|3.2.1.51:6	GH43_18(84-309)+GH29(347-715)	GH43_e173+GH29_e53	3	maxbin_LW.269.fasta	Lacipirellulaceae	45	E	GH29	GH43	GH43	GH43	GH	GH43
Prodigal_2975|LOCUS_19660	3.2.1.146:1	GH43_34(24-315)	GH43_e147	3	maxbin_LW.269.fasta	Lacipirellulaceae	45	E	GH43	GH43	GH43	GH43	GH	GH43
Prodigal_3084|LOCUS_20150	3.2.1.-:5	GH43_26(42-340)	GH43_e105	3	maxbin_LW.269.fasta	Lacipirellulaceae	45	E	GH43	GH43	GH43	GH43	GH	GH43
Prodigal_666|LOCUS_05390	-	GH43_18(72-297)	GH43_e233	3	maxbin_LW.269.fasta	Lacipirellulaceae	45	E	GH43	GH43	GH43	GH43	GH	GH43
Prodigal_1236|LOCUS_09630	-	GH51_1(215-653)	GH51_e18	3	maxbin_LW.269.fasta	Lacipirellulaceae	45	E	GH51	GH51	GH51	GH51	GH	GH51
Prodigal_1096|LOCUS_08670	-	GH53(39-351)	GH53_e24	3	maxbin_LW.269.fasta	Lacipirellulaceae	45	E	GH53	GH53	GH53	GH53	GH	GH53
Prodigal_459|LOCUS_03760	-	GH57(8-301)	GH57_e35	3	maxbin_LW.269.fasta	Lacipirellulaceae	45	E	GH57	GH57	GH57	GH57	GH
Prodigal_1530|LOCUS_11550	-	GH76(73-320)	GH76_e40	2	maxbin_LW.269.fasta	Lacipirellulaceae	45	E		GH76	GH76	GH76	GH	GH76
Prodigal_214|LOCUS_01740	-	GH88(51-442)	GH88_e31	3	maxbin_LW.269.fasta	Lacipirellulaceae	45	E	GH88	GH88	GH88	GH88	GH
Prodigal_419|LOCUS_03450	3.2.1.-:3|3.2.1.63:2	GH95(29-769)	GH95_e1	3	maxbin_LW.269.fasta	Lacipirellulaceae	45	E	GH95	GH95	GH95	GH95	GH
Prodigal_490|LOCUS_03990	3.2.1.-:3|3.2.1.63:2	GH95(6-564)	GH95_e1	3	maxbin_LW.269.fasta	Lacipirellulaceae	45	E	GH95	GH95	GH95	GH95	GH
Prodigal_22|LOCUS_00200	3.2.1.-:1	GH97(21-679)	GH97_e9	3	maxbin_LW.269.fasta	Lacipirellulaceae	45	E	GH97	GH97	GH97	GH97	GH
Prodigal_870|LOCUS_06960	-	GH97(22-620)	GH97_e24	3	maxbin_LW.269.fasta	Lacipirellulaceae	45	E	GH97	GH97	GH97	GH97	GH
Prodigal_3046|LOCUS_20010	-	PL1(74-253)	PL1_e74	2	maxbin_LW.269.fasta	Lacipirellulaceae	45	E		PL1	PL1	PL1	PL	PL1
Prodigal_383|LOCUS_03170	4.2.2.11:2|4.2.2.-:2|4.2.2.3:1	PL6(37-404)	PL6_e7	3	maxbin_LW.269.fasta	Lacipirellulaceae	45	E	PL6	PL6	PL6	PL6	PL	PL6
Prodigal_2078|LOCUS_20640	-	AA4(7-215)	AA4_e1	2	maxbin_LW.013.fasta	Latescibacterales	6	A		AA4	AA4	AA4	AA	AA4
Prodigal_2852|LOCUS_28230	3.1.1.73:1|3.2.1.55:1|3.2.1.8:1|-	CE1(155-409)	CBM48_e68+CE1_e22	3	maxbin_LW.013.fasta	Latescibacterales	6	A	CBM48	CE1	CBM48	CBM48	CBM
Prodigal_370|LOCUS_03690	-|-	CE1(144-370)	CBM48_e85+CE1_e22	3	maxbin_LW.013.fasta	Latescibacterales	6	A	CBM48	CE1	CBM48	CBM48	CBM
Prodigal_730|LOCUS_07270	3.2.1.8:5|3.1.1.73:2|-	CE1(152-393)	CBM48_e44+CE1_e22	3	maxbin_LW.013.fasta	Latescibacterales	6	A	CBM48	CE1	CBM48	CBM48	CBM
Prodigal_731|LOCUS_07280	3.2.1.8:5|3.1.1.73:2|-	CE1(152-364)	CBM48_e44+CE1_e22	3	maxbin_LW.013.fasta	Latescibacterales	6	A	CBM48	CE1	CBM48	CBM48	CBM
Prodigal_732|LOCUS_07290	3.2.1.8:5|3.1.1.73:2|-	CE1(153-384)	CBM48_e44+CE1_e22	3	maxbin_LW.013.fasta	Latescibacterales	6	A	CBM48	CE1	CBM48	CBM48	CBM
Prodigal_2036|LOCUS_20220	-	CBM57(515-627)	CBM57_e28	3	maxbin_LW.013.fasta	Latescibacterales	6	A	CBM57	CBM57	CBM57	CBM57	CBM
Prodigal_1328|LOCUS_13220	-	CBM9(49-246)	CBM9_e16	2	maxbin_LW.013.fasta	Latescibacterales	6	A		CBM9	CBM9	CBM9	CBM	CBM9
Prodigal_2439|LOCUS_24200	-	CBM9(36-235)	CBM9_e3	2	maxbin_LW.013.fasta	Latescibacterales	6	A		CBM9	CBM9	CBM9	CBM	CBM9
Prodigal_1379|LOCUS_13700	-	CE1(141-362)	CE1_e22	2	maxbin_LW.013.fasta	Latescibacterales	6	A		CE1	CE1	CE1	CE	CE1
Prodigal_1733|LOCUS_17210	3.1.1.73:1|3.2.1.55:1|3.2.1.8:1|-	CE1(165-383)	CBM48_e68+CE1_e22	3	maxbin_LW.013.fasta	Latescibacterales	6	A	CE0	CE1	CE1	CE1	CE	CE1
Prodigal_2851|LOCUS_28220	3.1.1.73:1|3.2.1.55:1|3.2.1.8:1|-	CE1(145-379)	CBM48_e68+CE1_e22	2	maxbin_LW.013.fasta	Latescibacterales	6	A		CE1	CE1	CE1	CE	CE1
Prodigal_728|LOCUS_07250	3.1.1.73:1|3.2.1.55:1|3.2.1.8:1|-	CE1(151-381)	CBM48_e68+CE1_e22	2	maxbin_LW.013.fasta	Latescibacterales	6	A		CE1	CE1	CE1	CE	CE1
Prodigal_733|LOCUS_07300	3.1.1.73:1|3.2.1.55:1|3.2.1.8:1|-	CE1(150-383)	CBM48_e68+CE1_e22	2	maxbin_LW.013.fasta	Latescibacterales	6	A		CE1	CE1	CE1	CE	CE1
Prodigal_734|LOCUS_07310	3.1.1.73:1|3.2.1.55:1|3.2.1.8:1|-	CE1(146-380)	CBM48_e68+CE1_e22	2	maxbin_LW.013.fasta	Latescibacterales	6	A		CE1	CE1	CE1	CE	CE1
Prodigal_736|LOCUS_07330	3.1.1.73:1|3.2.1.55:1|3.2.1.8:1|-	CE1(151-381)	CBM48_e68+CE1_e22	2	maxbin_LW.013.fasta	Latescibacterales	6	A		CE1	CE1	CE1	CE	CE1
Prodigal_737|LOCUS_07340	3.1.1.73:1|3.2.1.55:1|3.2.1.8:1|-	CE1(165-413)	CBM48_e68+CE1_e22	2	maxbin_LW.013.fasta	Latescibacterales	6	A		CE1	CE1	CE1	CE	CE1
Prodigal_2231|LOCUS_22160	-	CE11(5-227)	CE11_e18	3	maxbin_LW.013.fasta	Latescibacterales	6	A	CE11	CE11	CE11	CE11	CE	CE11
Prodigal_2041|LOCUS_20270	-	CE14(8-113)	CE14_e15	2	maxbin_LW.013.fasta	Latescibacterales	6	A		CE14	CE14	CE14	CE	CE14
Prodigal_2186|LOCUS_21720	-	CE14(4-122)	CE14_e52	2	maxbin_LW.013.fasta	Latescibacterales	6	A		CE14	CE14	CE14	CE	CE14
Prodigal_1744|LOCUS_17320	3.1.1.-:2|3.1.1.72:1	CE15(125-490)	CE15_e14	3	maxbin_LW.013.fasta	Latescibacterales	6	A	CE15	CE15	CE15	CE15	CE	CE15
Prodigal_2856|LOCUS_28270	3.1.1.-:1	CE15(66-397)	CE15_e21	2	maxbin_LW.013.fasta	Latescibacterales	6	A		CE15	CE15	CE15	CE	CE15
Prodigal_643|LOCUS_06410	3.1.1.-:2|3.1.1.72:1	CE15(79-457)	CE15_e14	3	maxbin_LW.013.fasta	Latescibacterales	6	A	CE15	CE15	CE15	CE15	CE	CE15
Prodigal_803|LOCUS_08000	3.1.1.-:2|3.1.1.72:1	CE15(81-460)	CE15_e14	3	maxbin_LW.013.fasta	Latescibacterales	6	A	CE15	CE15	CE15	CE15	CE	CE15
Prodigal_1070|LOCUS_10650	-	CE4(39-147)	CE4_e54	2	maxbin_LW.013.fasta	Latescibacterales	6	A		CE4	CE4	CE4	CE	CE4
Prodigal_1602|LOCUS_15920	-	CE4(53-192)	CE4_e233	2	maxbin_LW.013.fasta	Latescibacterales	6	A		CE4	CE4	CE4	CE	CE4
Prodigal_2461|LOCUS_24420	-	CE4(29-147)	CE4_e209	2	maxbin_LW.013.fasta	Latescibacterales	6	A		CE4	CE4	CE4	CE	CE4
Prodigal_2440|LOCUS_24210	3.1.1.72:6|3.1.1.73:2	CE6(89-198)	CE6_e2	3	maxbin_LW.013.fasta	Latescibacterales	6	A	CE6	CE6	CE6	CE6	CE	CE6
Prodigal_1705|LOCUS_16930	-	GH10(73-378)	GH10_e65	2	maxbin_LW.013.fasta	Latescibacterales	6	A		GH10	GH10	GH10	GH	GH10
Prodigal_1805|LOCUS_17930	3.2.1.8:6	GH10(43-324)	GH10_e0	3	maxbin_LW.013.fasta	Latescibacterales	6	A	CBM4	GH10	GH10	GH10	GH	GH10
Prodigal_2858|LOCUS_28290	3.2.1.8:8|3.1.1.73:3|3.2.1.55:1	GH10(29-363)	GH10_e12	3	maxbin_LW.013.fasta	Latescibacterales	6	A	GH10	GH10	GH10	GH10	GH	GH10
Prodigal_280|LOCUS_02790	-	GH103(100-250)	GH103_e41	2	maxbin_LW.013.fasta	Latescibacterales	6	A		GH103	GH103	GH103	GH
Prodigal_1747|LOCUS_17350	-	GH105(69-363)	GH105_e43	3	maxbin_LW.013.fasta	Latescibacterales	6	A	GH105	GH105	GH105	GH105	GH
Prodigal_2311|LOCUS_22960	-	GH106(4-697)	GH106_e35	3	maxbin_LW.013.fasta	Latescibacterales	6	A	GH106	GH106	GH106	GH106	GH
Prodigal_413|LOCUS_04120	-	GH109(9-156)	GH109_e7	2	maxbin_LW.013.fasta	Latescibacterales	6	A		GH109	GH109	GH109	GH
Prodigal_1758|LOCUS_17460	3.2.1.131:6	GH115(46-673)	GH115_e0	3	maxbin_LW.013.fasta	Latescibacterales	6	A	GH115	GH115	GH115	GH115	GH	GH115
Prodigal_1412|LOCUS_14030	-	GH141(20-319)+GH141(321-530)	GH141_e13	3	maxbin_LW.013.fasta	Latescibacterales	6	A	GH141	GH141	GH141	GH141	GH
Prodigal_1699|LOCUS_16870	-	GH146(61-572)	GH146_e1	3	maxbin_LW.013.fasta	Latescibacterales	6	A	GH146	GH146	GH146	GH146	GH
Prodigal_2849|LOCUS_28200	-	GH146(39-546)	GH146_e1	3	maxbin_LW.013.fasta	Latescibacterales	6	A	GH146	GH146	GH146	GH146	GH
Prodigal_891|LOCUS_08870	-	GH154(21-379)	GH154_e8	3	maxbin_LW.013.fasta	Latescibacterales	6	A	GH154	GH154	GH154	GH154	GH
Prodigal_1545|LOCUS_15350	3.2.1.23:2	GH2(37-606)+CBM32(672-787)	GH2_e127	3	maxbin_LW.013.fasta	Latescibacterales	6	A	CBM32	GH2	GH2	GH2	GH	GH2
Prodigal_442|LOCUS_04410	-	GH2(44-486)	GH2_e154	3	maxbin_LW.013.fasta	Latescibacterales	6	A	GH2	GH2	GH2	GH2	GH	GH2
Prodigal_66|LOCUS_00650	3.2.1.17:12|4.2.2.n1:6	GH23(98-199)	GH23_e335	2	maxbin_LW.013.fasta	Latescibacterales	6	A		GH23	GH23	GH23	GH
Prodigal_966|LOCUS_09620	-|-|-	GH23(214-342)	GH23_e450+CBM50_e832+CBM50_e914	2	maxbin_LW.013.fasta	Latescibacterales	6	A		GH23	GH23	GH23	GH
Prodigal_1700|LOCUS_16880	-	GH29(17-404)	GH29_e47	3	maxbin_LW.013.fasta	Latescibacterales	6	A	GH29	GH29	GH29	GH29	GH
Prodigal_1901|LOCUS_18870	-	GH29(33-440)	GH29_e75	3	maxbin_LW.013.fasta	Latescibacterales	6	A	GH29	GH29	GH29	GH29	GH
Prodigal_1743|LOCUS_17310	3.2.1.21:3|3.2.1.74:3|3.2.1.-:3|3.2.1.6:2|3.2.1.155:1	GH3(108-367)	GH3_e227	3	maxbin_LW.013.fasta	Latescibacterales	6	A	GH3	GH3	GH3	GH3	GH	GH3
Prodigal_1749|LOCUS_17370	3.2.1.37:92|3.2.1.55:39|3.2.1.21:1|3.2.1.6:1|3.2.1.73:1	GH3(67-307)	GH3_e0	3	maxbin_LW.013.fasta	Latescibacterales	6	A	GH3	GH3	GH3	GH3	GH	GH3
Prodigal_1751|LOCUS_17390	3.2.1.37:92|3.2.1.55:39|3.2.1.21:1|3.2.1.6:1|3.2.1.73:1	GH3(73-310)	GH3_e0	3	maxbin_LW.013.fasta	Latescibacterales	6	A	GH3	GH3	GH3	GH3	GH	GH3
Prodigal_2412|LOCUS_23950	3.2.1.21:1|3.2.1.37:1	GH3(116-345)	GH3_e209	3	maxbin_LW.013.fasta	Latescibacterales	6	A	GH3	GH3	GH3	GH3	GH	GH3
Prodigal_644|LOCUS_06420	-	GH35(51-240)	GH35_e44	3	maxbin_LW.013.fasta	Latescibacterales	6	A	GH35	GH35	GH35	GH35	GH
Prodigal_1231|LOCUS_12250	-|-	GH43_28(102-368)+CBM32(405-527)	GH43_e302+CBM32_e190	3	maxbin_LW.013.fasta	Latescibacterales	6	A	CBM32	GH43	GH43	GH43	GH	GH43
Prodigal_1863|LOCUS_18490	3.2.1.37:2|3.2.1.55:2|3.2.1.8:1|3.2.1.8:1|3.2.1.37:1|3.2.1.55:1	GH43_29(28-314)+CBM6(333-457)	GH43_e59+CBM6_e0	3	maxbin_LW.013.fasta	Latescibacterales	6	A	CBM6	GH43	GH43	GH43	GH	GH43
Prodigal_1900|LOCUS_18860	3.2.1.37:2|3.2.1.55:2|3.2.1.8:1|3.2.1.8:1|3.2.1.37:1|3.2.1.55:1	GH43_29(26-312)+CBM6(334-455)	GH43_e59+CBM6_e0	3	maxbin_LW.013.fasta	Latescibacterales	6	A	CBM6	GH43	GH43	GH43	GH	GH43
Prodigal_1902|LOCUS_18880	-|-	GH43_10(56-326)+CBM91(359-568)	GH43_e163+CBM91_e53	3	maxbin_LW.013.fasta	Latescibacterales	6	A	CBM91	GH43	GH43	GH43	GH	GH43
Prodigal_2086|LOCUS_20720	-|-	GH43_28(67-329)	GH43_e85+CBM32_e190	3	maxbin_LW.013.fasta	Latescibacterales	6	A	CBM32	GH43	GH43	GH43	GH	GH43
Prodigal_2850|LOCUS_28210	-|-	GH43_10(38-291)+CBM91(320-518)	GH43_e41+CBM91_e53	3	maxbin_LW.013.fasta	Latescibacterales	6	A	GH43	GH43	GH43	GH43	GH	GH43
Prodigal_2857|LOCUS_28280	-	GH43_19(98-346)	GH43_e186	3	maxbin_LW.013.fasta	Latescibacterales	6	A	GH43	GH43	GH43	GH43	GH	GH43
Prodigal_725|LOCUS_07220	-|-	GH43_10(55-325)+CBM91(358-564)	GH43_e163+CBM91_e37	3	maxbin_LW.013.fasta	Latescibacterales	6	A	CBM91	GH43	GH43	GH43	GH	GH43
Prodigal_1738|LOCUS_17260	-	GH5(48-272)	GH5_e66	2	maxbin_LW.013.fasta	Latescibacterales	6	A		GH5	GH5	GH5	GH	GH5
Prodigal_1908|LOCUS_18940	3.2.1.146:3	GH5(28-244)	GH5_e221	3	maxbin_LW.013.fasta	Latescibacterales	6	A	GH0	GH5	GH5	GH5	GH	GH5
Prodigal_1035|LOCUS_10310	-	GH51_2(208-835)	GH51_e33	3	maxbin_LW.013.fasta	Latescibacterales	6	A	GH51	GH51	GH51	GH51	GH	GH51
Prodigal_1547|LOCUS_15370	3.2.1.55:27	GH51_1(34-533)	GH51_e19	3	maxbin_LW.013.fasta	Latescibacterales	6	A	GH51	GH51	GH51	GH51	GH	GH51
Prodigal_1905|LOCUS_18910	3.2.1.55:27	GH51_1(35-533)	GH51_e19	3	maxbin_LW.013.fasta	Latescibacterales	6	A	GH51	GH51	GH51	GH51	GH	GH51
Prodigal_724|LOCUS_07210	3.2.1.55:37	GH51_1(32-513)	GH51_e0	3	maxbin_LW.013.fasta	Latescibacterales	6	A	GH51	GH51	GH51	GH51	GH	GH51
Prodigal_740|LOCUS_07370	3.2.1.55:37	GH51_1(31-494)	GH51_e0	3	maxbin_LW.013.fasta	Latescibacterales	6	A	GH51	GH51	GH51	GH51	GH	GH51
Prodigal_1899|LOCUS_18850	3.2.1.55:24|3.2.1.37:1	GH54(39-366)	GH54_e0	3	maxbin_LW.013.fasta	Latescibacterales	6	A	GH54	GH54	GH54	GH54	GH	GH54
Prodigal_306|LOCUS_03050	2.4.1.18:3|3.2.1.1:1	GH57(7-462)	GH57_e46	3	maxbin_LW.013.fasta	Latescibacterales	6	A	GH57	GH57	GH57	GH57	GH
Prodigal_307|LOCUS_03060	-	GH57(9-280)	GH57_e35	3	maxbin_LW.013.fasta	Latescibacterales	6	A	GH57	GH57	GH57	GH57	GH
Prodigal_308|LOCUS_03070	-	GH57(1-449)	GH57_e7	3	maxbin_LW.013.fasta	Latescibacterales	6	A	GH57	GH57	GH57	GH57	GH
Prodigal_2855|LOCUS_28260	3.1.1.73:1|3.2.1.55:1|3.2.1.8:1	GH62(38-314)	GH62_e3	3	maxbin_LW.013.fasta	Latescibacterales	6	A	CBM48	GH62	GH62	GH62	GH	GH62
Prodigal_1304|LOCUS_12980	3.2.1.139:4|3.2.1.131:3|3.2.1.-:1	GH67(31-714)	GH67_e0	3	maxbin_LW.013.fasta	Latescibacterales	6	A	GH67	GH67	GH67	GH67	GH	GH67
Prodigal_1550|LOCUS_15400	3.2.1.139:4|3.2.1.131:3|3.2.1.-:1	GH67(26-708)	GH67_e0	3	maxbin_LW.013.fasta	Latescibacterales	6	A	GH67	GH67	GH67	GH67	GH	GH67
Prodigal_1746|LOCUS_17340	3.2.1.139:4|3.2.1.131:3|3.2.1.-:1	GH67(24-705)	GH67_e0	3	maxbin_LW.013.fasta	Latescibacterales	6	A	GH67	GH67	GH67	GH67	GH	GH67
Prodigal_1472|LOCUS_14620	3.2.1.-:3	GH88(78-398)	GH88_e11	2	maxbin_LW.013.fasta	Latescibacterales	6	A		GH88	GH88	GH88	GH
Prodigal_726|LOCUS_07230	3.2.1.-:3|3.2.1.63:2	GH95(47-805)	GH95_e1	3	maxbin_LW.013.fasta	Latescibacterales	6	A	GH95	GH95	GH95	GH95	GH
Prodigal_735|LOCUS_07320	3.2.1.22:1|3.2.1.88:1	GH97(13-646)	GH97_e18	3	maxbin_LW.013.fasta	Latescibacterales	6	A	GH97	GH97	GH97	GH97	GH
Prodigal_1353|LOCUS_13460	-	PL39(390-772)	PL39_e0	2	maxbin_LW.013.fasta	Latescibacterales	6	A		PL39	PL39	PL39	PL
Prodigal_3812|LOCUS_33420	1.10.3.2:4|1.10.3.-:1	AA1(60-470)	AA1_e46	2	CW_metabat_CW.121.fa	Methyloligellaceae	21	B		AA1	AA1	AA1	AA	AA1
Prodigal_3831|LOCUS_33570	1.10.3.2:1	AA1(121-332)	AA1_e1	2	CW_metabat_CW.121.fa	Methyloligellaceae	21	B		AA1	AA1	AA1	AA	AA1
Prodigal_1587|LOCUS_14750	-	AA3_2(6-531)	AA3_e57	3	CW_metabat_CW.121.fa	Methyloligellaceae	21	B	AA3	AA3	AA3	AA3	AA	AA3
Prodigal_9|LOCUS_00080	-	AA5(41-527)	AA5_e0	3	CW_metabat_CW.121.fa	Methyloligellaceae	21	B	AA5	AA5	AA5	AA5	AA	AA5
Prodigal_2214|LOCUS_20300	-	CE11(10-281)	CE11_e11	3	CW_metabat_CW.121.fa	Methyloligellaceae	21	B	CE11	CE11	CE11	CE11	CE	CE11
Prodigal_538|LOCUS_05150	-	CE4(59-168)	CE4_e265	2	CW_metabat_CW.121.fa	Methyloligellaceae	21	B		CE4	CE4	CE4	CE	CE4
Prodigal_4463|LOCUS_38280	3.5.1.41:1	-	CE4_e177	2	CW_metabat_CW.121.fa	Methyloligellaceae	21	B	CE4		CE4	CE4	CE	CE4
Prodigal_3961|LOCUS_34610	-	GH102(90-244)	GH102_e28	2	CW_metabat_CW.121.fa	Methyloligellaceae	21	B		GH102	GH102	GH102	GH	GH102
Prodigal_4457|LOCUS_38240	-	GH103(37-342)	GH103_e5	3	CW_metabat_CW.121.fa	Methyloligellaceae	21	B	GH103	GH103	GH103	GH103	GH
Prodigal_555|LOCUS_05320	-	GH103(34-328)	GH103_e17	3	CW_metabat_CW.121.fa	Methyloligellaceae	21	B	GH103	GH103	GH103	GH103	GH
Prodigal_679|LOCUS_06450	4.2.2.n1:1	GH103(46-340)	GH103_e1	3	CW_metabat_CW.121.fa	Methyloligellaceae	21	B	GH103	GH103	GH103	GH103	GH
Prodigal_680|LOCUS_06460	-	GH103(44-360)	GH103_e5	3	CW_metabat_CW.121.fa	Methyloligellaceae	21	B	GH103	GH103	GH103	GH103	GH
Prodigal_767|LOCUS_07280	-	GH103(33-238)	GH103_e35	2	CW_metabat_CW.121.fa	Methyloligellaceae	21	B		GH103	GH103	GH103	GH
Prodigal_3594|LOCUS_31820	-	GH109(9-140)	GH109_e7	2	CW_metabat_CW.121.fa	Methyloligellaceae	21	B		GH109	GH109	GH109	GH
Prodigal_302|LOCUS_02910	-	GH13_18(124-464)	GH13_e237	3	CW_metabat_CW.121.fa	Methyloligellaceae	21	B	GH13	GH13	GH13	GH13	GH
Prodigal_5163|LOCUS_43080	3.2.1.20:1	GH13_23(27-374)	GH13_e140	3	CW_metabat_CW.121.fa	Methyloligellaceae	21	B	GH13	GH13	GH13	GH13	GH
Prodigal_1901|LOCUS_17520	3.2.1.92:6	GH171(71-441)	GH171_e0	3	CW_metabat_CW.121.fa	Methyloligellaceae	21	B	GH171	GH171	GH171	GH171	GH
Prodigal_1252|LOCUS_11720	-	GH23(354-491)	GH23_e638	3	CW_metabat_CW.121.fa	Methyloligellaceae	21	B	GH23	GH23	GH23	GH23	GH
Prodigal_1135|LOCUS_10640	-	GH3(63-283)	GH3_e228	2	CW_metabat_CW.121.fa	Methyloligellaceae	21	B		GH3	GH3	GH3	GH	GH3
Prodigal_2713|LOCUS_24610	-	GH3(142-371)	GH3_e84	2	CW_metabat_CW.121.fa	Methyloligellaceae	21	B		GH3	GH3	GH3	GH	GH3
Prodigal_3643|LOCUS_32190	3.2.1.78:15	GH5_8(34-286)	GH5_e22	2	CW_metabat_CW.121.fa	Methyloligellaceae	21	B		GH5	GH5	GH5	GH	GH5
Prodigal_796|LOCUS_06740	-	AA1(77-484)	AA1_e20	2	C_metabat_C.124.fa	Micropepsaceae	12	B		AA1	AA1	AA1	AA	AA1
Prodigal_79|LOCUS_00730	-	GH15(219-583)	GH15_e57	3	C_metabat_C.124.fa	Micropepsaceae	12	B	GH15	GH15	GH15	GH15	GH
Prodigal_1301|LOCUS_10620	-	GH23(517-650)	GH23_e644	3	C_metabat_C.124.fa	Micropepsaceae	12	B	GH23	GH23	GH23	GH23	GH
Prodigal_201|LOCUS_01820	-	GH23(397-523)	GH23_e690	3	C_metabat_C.124.fa	Micropepsaceae	12	B	GH23	GH23	GH23	GH23	GH
Prodigal_1563|LOCUS_14080	-	AA3(162-654)	AA3_e4	2	C_metabat_C.19.fa	Nitriliruptoraceae	60	F		AA3	AA3	AA3	AA	AA3
Prodigal_1890|LOCUS_16810	-	AA4(7-223)	AA4_e1	2	C_metabat_C.19.fa	Nitriliruptoraceae	60	F		AA4	AA4	AA4	AA	AA4
Prodigal_698|LOCUS_06490	-	AA4(9-196)	AA4_e1	2	C_metabat_C.19.fa	Nitriliruptoraceae	60	F		AA4	AA4	AA4	AA	AA4
Prodigal_2199|LOCUS_19320	-	AA6(4-198)	AA6_e2	2	C_metabat_C.19.fa	Nitriliruptoraceae	60	F		AA6	AA6	AA6	AA	AA6
Prodigal_2520|LOCUS_21770	2.4.1.18:57|2.4.1.18:14	CBM48(39-127)+GH13_9(201-501)	CBM48_e2+GH13_e200	3	C_metabat_C.19.fa	Nitriliruptoraceae	60	F	CBM48	CBM48	CBM48	CBM48	CBM
Prodigal_1336|LOCUS_12180	3.5.1.115:3	CE14(6-138)	CE14_e1	2	C_metabat_C.19.fa	Nitriliruptoraceae	60	F		CE14	CE14	CE14	CE	CE14
Prodigal_1714|LOCUS_15400	-	CE14(11-117)	CE14_e39	2	C_metabat_C.19.fa	Nitriliruptoraceae	60	F		CE14	CE14	CE14	CE	CE14
Prodigal_2333|LOCUS_20350	3.5.1.89:6	CE14(15-145)	CE14_e2	2	C_metabat_C.19.fa	Nitriliruptoraceae	60	F		CE14	CE14	CE14	CE	CE14
Prodigal_3119|LOCUS_26090	-	CE9(23-364)	CE9_e48	2	C_metabat_C.19.fa	Nitriliruptoraceae	60	F		CE9	CE9	CE9	CE	CE9
Prodigal_2048|LOCUS_18110	-	GH13(99-354)	GH13_e239	3	C_metabat_C.19.fa	Nitriliruptoraceae	60	F	GH13	GH13	GH13	GH13	GH
Prodigal_2754|LOCUS_23440	2.4.1.7:2	GH13_18(33-380)	GH13_e144	3	C_metabat_C.19.fa	Nitriliruptoraceae	60	F	GH13	GH13	GH13	GH13	GH
Prodigal_2957|LOCUS_24890	-	GH13_3(222-441)	GH13_e41	3	C_metabat_C.19.fa	Nitriliruptoraceae	60	F	GH13	GH13	GH13	GH13	GH
Prodigal_3574|LOCUS_29050	-|-	GH13_21(177-488)	CBM34_e5+GH13_e177	3	C_metabat_C.19.fa	Nitriliruptoraceae	60	F	GH13	GH13	CBM34	GH13	GH
Prodigal_884|LOCUS_08200	3.2.1.68:15|3.2.1.-:1	GH13_11(69-422)	GH13_e48	3	C_metabat_C.19.fa	Nitriliruptoraceae	60	F	CBM48	GH13	GH13	GH13	GH
Prodigal_828|LOCUS_07690	-	GH16_24(2-176)	GH16_e38	2	C_metabat_C.19.fa	Nitriliruptoraceae	60	F		GH16	GH16	GH16	GH	GH16
Prodigal_2154|LOCUS_18960	-	GH176(240-639)	-	2	C_metabat_C.19.fa	Nitriliruptoraceae	60	F	GH176	GH176		GH176	GH
Prodigal_271|LOCUS_02570	-	GH176(234-631)	-	2	C_metabat_C.19.fa	Nitriliruptoraceae	60	F	GH176	GH176		GH176	GH
Prodigal_2605|LOCUS_22380	-	GH23(107-215)	GH23_e779	2	C_metabat_C.19.fa	Nitriliruptoraceae	60	F		GH23	GH23	GH23	GH
Prodigal_2917|LOCUS_24600	-	GH23(343-448)	GH23_e295	2	C_metabat_C.19.fa	Nitriliruptoraceae	60	F		GH23	GH23	GH23	GH
Prodigal_1590|LOCUS_14310	-	GH26(122-265)	GH26_e46	2	C_metabat_C.19.fa	Nitriliruptoraceae	60	F		GH26	GH26	GH26	GH	GH26
Prodigal_3383|LOCUS_27810	-	GH3(144-370)	GH3_e74	3	C_metabat_C.19.fa	Nitriliruptoraceae	60	F	GH3	GH3	GH3	GH3	GH	GH3
Prodigal_3123|LOCUS_26120	3.2.1.204:2	GH31_7(263-727)	GH31_e4	3	C_metabat_C.19.fa	Nitriliruptoraceae	60	F	GH31	GH31	GH31	GH31	GH
Prodigal_273|LOCUS_02590	-	GH65(386-758)	GH65_e26	3	C_metabat_C.19.fa	Nitriliruptoraceae	60	F	GH65	GH65	GH65	GH65	GH
Prodigal_89|LOCUS_00840	2.4.1.64:4	GH65(345-718)	GH65_e2	3	C_metabat_C.19.fa	Nitriliruptoraceae	60	F	GH65	GH65	GH65	GH65	GH
Prodigal_1943|LOCUS_17240	-	PL1(388-575)	PL1_e89	2	C_metabat_C.19.fa	Nitriliruptoraceae	60	F		PL1	PL1	PL1	PL	PL1
Prodigal_2558|LOCUS_22040	-	PL1_2(123-322)	PL1_e76	2	C_metabat_C.19.fa	Nitriliruptoraceae	60	F		PL1	PL1	PL1	PL	PL1
Prodigal_2810|LOCUS_23840	-	PL1(128-309)	PL1_e89	2	C_metabat_C.19.fa	Nitriliruptoraceae	60	F		PL1	PL1	PL1	PL	PL1
Prodigal_1232|LOCUS_10730	-	GH63(32-435)	GH63_e17	3	CW_maxbin_CW.098.fasta	Nitrososphaeraceae (a)	24	B	GH63	GH63	GH63	GH63	GH
Prodigal_1671|LOCUS_13300	-	CE4(96-218)	CE4_e274	2	CW_maxbin_CW.218.fasta	Nitrososphaeraceae (b)	19	B		CE4	CE4	CE4	CE	CE4
Prodigal_577|LOCUS_05170	-	GH63(13-456)	GH63_e17	3	CW_maxbin_CW.218.fasta	Nitrososphaeraceae (b)	19	B	GH63	GH63	GH63	GH63	GH
Prodigal_2131|LOCUS_11600	-	CE1(10-252)	CE1_e38	2	maxbin_L.002.fasta	Paenibacillaceae	3	A		CE1	CE1	CE1	CE	CE1
Prodigal_702|LOCUS_05080	-	CE14(12-118)	CE14_e19	2	maxbin_L.002.fasta	Paenibacillaceae	3	A		CE14	CE14	CE14	CE	CE14
Prodigal_399|LOCUS_03150	3.5.1.104:5	CE4(71-194)	CE4_e23	3	maxbin_L.002.fasta	Paenibacillaceae	3	A	CE4	CE4	CE4	CE4	CE	CE4
Prodigal_637|LOCUS_04680	3.2.1.8:22	GH10(12-334)	GH10_e135	3	maxbin_L.002.fasta	Paenibacillaceae	3	A	GH10	GH10	GH10	GH10	GH	GH10
Prodigal_129|LOCUS_01130	-	GH109(3-167)	GH109_e7	2	maxbin_L.002.fasta	Paenibacillaceae	3	A		GH109	GH109	GH109	GH
Prodigal_79|LOCUS_00690	-	GH140(104-365)	GH140_e16	2	maxbin_L.002.fasta	Paenibacillaceae	3	A		GH140	GH140	GH140	GH
Prodigal_1692|LOCUS_10030	-	GH144(4-397)	GH144_e9	3	maxbin_L.002.fasta	Paenibacillaceae	3	A	GH144	GH144	GH144	GH144	GH
Prodigal_304|LOCUS_02440	-	GH23(50-184)	GH23_e404	2	maxbin_L.002.fasta	Paenibacillaceae	3	A		GH23	GH23	GH23	GH
Prodigal_267|LOCUS_02160	3.2.1.52:4	GH3(67-293)	GH3_e199	3	maxbin_L.002.fasta	Paenibacillaceae	3	A	GH3	GH3	GH3	GH3	GH	GH3
Prodigal_3749|LOCUS_32420	1.10.3.2:1	AA1(122-308)	AA1_e26	2	L_metabat_L.95.fa	Planctomycetaceae	34	C		AA1	AA1	AA1	AA	AA1
Prodigal_631|LOCUS_05900	-|-|-	CBM2(50-142)+GH8(958-1296)+CBM2(1491-1587)	CBM2_e56+GH8_e16+CBM2_e56	3	L_metabat_L.95.fa	Planctomycetaceae	34	C	CBM2	CBM2	CBM2	CBM2	CBM	CBM2
Prodigal_2848|LOCUS_25180	-	CBM38(437-566)	CBM38_e11	3	L_metabat_L.95.fa	Planctomycetaceae	34	C	CBM38	CBM38	CBM38	CBM38	CBM	CBM38
Prodigal_3092|LOCUS_27200	-	CBM47(423-503)	CBM47_e2	3	L_metabat_L.95.fa	Planctomycetaceae	34	C	CBM47	CBM47	CBM47	CBM47	CBM
Prodigal_4465|LOCUS_37700	3.2.1.68:75|2.4.1.25:4|3.2.1.-:1|3.2.1.68:15|3.2.1.-:1	GH13_11(184-533)	CBM48_e3+GH13_e48	3	L_metabat_L.95.fa	Planctomycetaceae	34	C	CBM48	GH13	CBM48	CBM48	CBM
Prodigal_4658|LOCUS_39130	2.4.1.18:57|2.4.1.18:14	CBM48(74-157)+GH13_9(227-527)	CBM48_e2+GH13_e200	3	L_metabat_L.95.fa	Planctomycetaceae	34	C	CBM48	CBM48	CBM48	CBM48	CBM
Prodigal_865|LOCUS_08050	3.2.1.141:34|3.2.1.1:4|3.2.1.141:4	GH13_10(402-712)	CBM48_e0+GH13_e92	3	L_metabat_L.95.fa	Planctomycetaceae	34	C	CBM48	GH13	CBM48	CBM48	CBM
Prodigal_4264|LOCUS_36250	-|-	-	CBM50_e822+CBM50_e822	2	L_metabat_L.95.fa	Planctomycetaceae	34	C	CBM50		CBM50	CBM50	CBM
Prodigal_2473|LOCUS_22060	-	CBM51(278-396)	CBM51_e15	3	L_metabat_L.95.fa	Planctomycetaceae	34	C	CBM51	CBM51	CBM51	CBM51	CBM	CBM51
Prodigal_2527|LOCUS_22530	-	CBM51(250-386)	CBM51_e47	3	L_metabat_L.95.fa	Planctomycetaceae	34	C	CBM51	CBM51	CBM51	CBM51	CBM	CBM51
Prodigal_2675|LOCUS_23750	-	CBM51(470-591)	CBM51_e32	3	L_metabat_L.95.fa	Planctomycetaceae	34	C	CBM51	CBM51	CBM51	CBM51	CBM	CBM51
Prodigal_3580|LOCUS_31090	-	CBM51(243-378)	CBM51_e10	3	L_metabat_L.95.fa	Planctomycetaceae	34	C	CBM51	CBM51	CBM51	CBM51	CBM	CBM51
Prodigal_3776|LOCUS_32610	-	-	CBM51_e31	2	L_metabat_L.95.fa	Planctomycetaceae	34	C	CBM51		CBM51	CBM51	CBM	CBM51
Prodigal_1828|LOCUS_16650	-	CBM67(269-412)	CBM67_e9	3	L_metabat_L.95.fa	Planctomycetaceae	34	C	CBM67	CBM67	CBM67	CBM67	CBM
Prodigal_4599|LOCUS_38750	-	CBM67(518-639)	CBM67_e10	3	L_metabat_L.95.fa	Planctomycetaceae	34	C	CBM67	CBM67	CBM67	CBM67	CBM
Prodigal_1609|LOCUS_14770	-	CE1(57-283)	CE1_e22	2	L_metabat_L.95.fa	Planctomycetaceae	34	C		CE1	CE1	CE1	CE	CE1
Prodigal_62|LOCUS_00590	-	CE11(6-277)	CE11_e36	3	L_metabat_L.95.fa	Planctomycetaceae	34	C	CE11	CE11	CE11	CE11	CE	CE11
Prodigal_1992|LOCUS_18030	-	CE12(34-230)	CE12_e35	3	L_metabat_L.95.fa	Planctomycetaceae	34	C	CE12	CE12	CE12	CE12	CE	CE12
Prodigal_5068|LOCUS_41800	-	CE12(32-236)	CE12_e60	2	L_metabat_L.95.fa	Planctomycetaceae	34	C		CE12	CE12	CE12	CE	CE12
Prodigal_3457|LOCUS_30130	-	CE14(13-110)	CE14_e58	2	L_metabat_L.95.fa	Planctomycetaceae	34	C		CE14	CE14	CE14	CE	CE14
Prodigal_4151|LOCUS_35410	-	CE14(8-113)	CE14_e58	3	L_metabat_L.95.fa	Planctomycetaceae	34	C	CE14	CE14	CE14	CE14	CE	CE14
Prodigal_4407|LOCUS_37310	-	CE14(9-118)	CE14_e40	2	L_metabat_L.95.fa	Planctomycetaceae	34	C		CE14	CE14	CE14	CE	CE14
Prodigal_4754|LOCUS_39690	-	CE14(38-146)	CE14_e40	2	L_metabat_L.95.fa	Planctomycetaceae	34	C		CE14	CE14	CE14	CE	CE14
Prodigal_5056|LOCUS_41720	-	CE14(11-115)	CE14_e9	3	L_metabat_L.95.fa	Planctomycetaceae	34	C	CE14	CE14	CE14	CE14	CE	CE14
Prodigal_3386|LOCUS_29560	3.2.1.40:2	CE15(36-423)	CE15_e10	3	L_metabat_L.95.fa	Planctomycetaceae	34	C	CE15	CE15	CE15	CE15	CE	CE15
Prodigal_70|LOCUS_00670	3.1.1.-:1	CE17(65-227)	CE17_e0	2	L_metabat_L.95.fa	Planctomycetaceae	34	C		CE17	CE17	CE17	CE	CE17
Prodigal_1650|LOCUS_15110	-	CE19(69-361)	CE19_e1	2	L_metabat_L.95.fa	Planctomycetaceae	34	C		CE19	CE19	CE19	CE	CE19
Prodigal_2137|LOCUS_19300	-	CE19(67-404)	CE19_e1	3	L_metabat_L.95.fa	Planctomycetaceae	34	C	CE0	CE19	CE19	CE19	CE	CE19
Prodigal_2239|LOCUS_20150	-	CE19(9-309)	CE19_e1	2	L_metabat_L.95.fa	Planctomycetaceae	34	C		CE19	CE19	CE19	CE	CE19
Prodigal_2336|LOCUS_20930	-	CE19(64-389)	CE19_e4	3	L_metabat_L.95.fa	Planctomycetaceae	34	C	CE19	CE19	CE19	CE19	CE	CE19
Prodigal_3009|LOCUS_26520	-	CE19(371-602)	CE19_e3	3	L_metabat_L.95.fa	Planctomycetaceae	34	C	GH0	CE19	CE19	CE19	CE	CE19
Prodigal_924|LOCUS_08560	-	CE19(94-417)	CE19_e3	2	L_metabat_L.95.fa	Planctomycetaceae	34	C		CE19	CE19	CE19	CE	CE19
Prodigal_97|LOCUS_00920	-	CE19(72-430)	CE19_e1	3	L_metabat_L.95.fa	Planctomycetaceae	34	C	CE19	CE19	CE19	CE19	CE	CE19
Prodigal_3011|LOCUS_26540	-	CE20(109-407)	CE20_e33	3	L_metabat_L.95.fa	Planctomycetaceae	34	C	CE20	CE20	CE20	CE20	CE	CE20
Prodigal_3057|LOCUS_26930	2.4.1.-:1|3.5.1.-:1	CE4(83-288)	CE4_e298	2	L_metabat_L.95.fa	Planctomycetaceae	34	C		CE4	CE4	CE4	CE	CE4
Prodigal_3380|LOCUS_29520	2.4.1.-:1|3.5.1.-:1	CE4(61-277)	CE4_e298	2	L_metabat_L.95.fa	Planctomycetaceae	34	C		CE4	CE4	CE4	CE	CE4
Prodigal_4941|LOCUS_40920	-	CE4(48-149)	CE4_e153	3	L_metabat_L.95.fa	Planctomycetaceae	34	C	CE4	CE4	CE4	CE4	CE	CE4
Prodigal_4398|LOCUS_37260	-	CE7(132-423)	CE7_e18	3	L_metabat_L.95.fa	Planctomycetaceae	34	C	CE7	CE7	CE7	CE7	CE	CE7
Prodigal_66|LOCUS_00630	-	GH10(210-493)	GH10_e89	3	L_metabat_L.95.fa	Planctomycetaceae	34	C	GH0	GH10	GH10	GH10	GH	GH10
Prodigal_2407|LOCUS_21500	-	GH105(314-602)	GH105_e43	3	L_metabat_L.95.fa	Planctomycetaceae	34	C	GH0	GH105	GH105	GH105	GH
Prodigal_1696|LOCUS_15510	-	GH109(47-202)	GH109_e2	2	L_metabat_L.95.fa	Planctomycetaceae	34	C		GH109	GH109	GH109	GH
Prodigal_1698|LOCUS_15530	3.2.1.49:3	GH109(2-160)	GH109_e1	2	L_metabat_L.95.fa	Planctomycetaceae	34	C		GH109	GH109	GH109	GH
Prodigal_2303|LOCUS_20660	-	GH109(10-199)	GH109_e7	2	L_metabat_L.95.fa	Planctomycetaceae	34	C		GH109	GH109	GH109	GH
Prodigal_2836|LOCUS_25060	-	GH109(45-195)	GH109_e2	2	L_metabat_L.95.fa	Planctomycetaceae	34	C		GH109	GH109	GH109	GH
Prodigal_3179|LOCUS_27890	-	GH109(4-154)	GH109_e7	2	L_metabat_L.95.fa	Planctomycetaceae	34	C		GH109	GH109	GH109	GH
Prodigal_425|LOCUS_04000	-	GH109(44-200)	GH109_e2	2	L_metabat_L.95.fa	Planctomycetaceae	34	C		GH109	GH109	GH109	GH
Prodigal_1394|LOCUS_12800	-	GH13_18(95-435)	GH13_e237	3	L_metabat_L.95.fa	Planctomycetaceae	34	C	GH13	GH13	GH13	GH13	GH
Prodigal_864|LOCUS_08040	2.4.1.4:1	GH13_4(118-511)	GH13_e129	3	L_metabat_L.95.fa	Planctomycetaceae	34	C	GH13	GH13	GH13	GH13	GH
Prodigal_632|LOCUS_05910	-	GH141(34-520)	GH141_e24	3	L_metabat_L.95.fa	Planctomycetaceae	34	C	GH141	GH141	GH141	GH141	GH
Prodigal_922|LOCUS_08540	-	GH163(286-541)	GH163_e14	3	L_metabat_L.95.fa	Planctomycetaceae	34	C	GH0	GH163	GH163	GH163	GH
Prodigal_1384|LOCUS_12710	-	GH165(51-514)	GH165_e4	3	L_metabat_L.95.fa	Planctomycetaceae	34	C	GH165	GH165	GH165	GH165	GH
Prodigal_1386|LOCUS_12730	-	GH165(33-514)	GH165_e1	3	L_metabat_L.95.fa	Planctomycetaceae	34	C	GH165	GH165	GH165	GH165	GH
Prodigal_22|LOCUS_00220	-	GH165(24-476)	GH165_e12	3	L_metabat_L.95.fa	Planctomycetaceae	34	C	GH165	GH165	GH165	GH165	GH
Prodigal_3202|LOCUS_28080	-	GH165(18-317)	GH165_e5	3	L_metabat_L.95.fa	Planctomycetaceae	34	C	GH165	GH165	GH165	GH165	GH
Prodigal_3713|LOCUS_32130	-	GH165(22-482)	GH165_e5	3	L_metabat_L.95.fa	Planctomycetaceae	34	C	GH165	GH165	GH165	GH165	GH
Prodigal_4412|LOCUS_37340	-	GH165(24-487)	GH165_e12	3	L_metabat_L.95.fa	Planctomycetaceae	34	C	GH0	GH165	GH165	GH165	GH
Prodigal_702|LOCUS_06550	-	GH165(22-521)	GH165_e5	3	L_metabat_L.95.fa	Planctomycetaceae	34	C	GH165	GH165	GH165	GH165	GH
Prodigal_3031|LOCUS_26730	-	GH166(58-299)	GH166_e7	3	L_metabat_L.95.fa	Planctomycetaceae	34	C	GH0	GH166	GH166	GH166	GH
Prodigal_4802|LOCUS_39990	-	GH171(428-781)	GH171_e8	3	L_metabat_L.95.fa	Planctomycetaceae	34	C	GH171	GH171	GH171	GH171	GH
Prodigal_1050|LOCUS_09700	-	GH33(298-613)	GH33_e58	3	L_metabat_L.95.fa	Planctomycetaceae	34	C	GH33	GH33	GH33	GH33	GH
Prodigal_1922|LOCUS_17440	-	GH33(82-372)	GH33_e125	3	L_metabat_L.95.fa	Planctomycetaceae	34	C	GH0	GH33	GH33	GH33	GH
Prodigal_289|LOCUS_02750	-	GH33(78-343)	-	2	L_metabat_L.95.fa	Planctomycetaceae	34	C	GH33	GH33		GH33	GH
Prodigal_3064|LOCUS_26990	-	GH33(93-375)	GH33_e48	3	L_metabat_L.95.fa	Planctomycetaceae	34	C	GH33	GH33	GH33	GH33	GH
Prodigal_3774|LOCUS_32590	-	GH33(35-374)	GH33_e109	3	L_metabat_L.95.fa	Planctomycetaceae	34	C	GH33	GH33	GH33	GH33	GH
Prodigal_3935|LOCUS_33830	-	GH33(10-353)	GH33_e70	3	L_metabat_L.95.fa	Planctomycetaceae	34	C	GH0	GH33	GH33	GH33	GH
Prodigal_4007|LOCUS_34340	-	GH33(58-357)	GH33_e108	3	L_metabat_L.95.fa	Planctomycetaceae	34	C	GH33	GH33	GH33	GH33	GH
Prodigal_4099|LOCUS_35000	-	GH33(50-335)	GH33_e86	3	L_metabat_L.95.fa	Planctomycetaceae	34	C	GH33	GH33	GH33	GH33	GH
Prodigal_4157|LOCUS_35440	-	GH33(41-348)	GH33_e137	3	L_metabat_L.95.fa	Planctomycetaceae	34	C	GH0	GH33	GH33	GH33	GH
Prodigal_4538|LOCUS_38310	-	GH33(51-346)	GH33_e125	3	L_metabat_L.95.fa	Planctomycetaceae	34	C	GH0	GH33	GH33	GH33	GH
Prodigal_4845|LOCUS_40270	-	GH33(60-309)	GH33_e108	2	L_metabat_L.95.fa	Planctomycetaceae	34	C		GH33	GH33	GH33	GH
Prodigal_5145|LOCUS_42250	-	GH33(34-368)	GH33_e60	3	L_metabat_L.95.fa	Planctomycetaceae	34	C	GH33	GH33	GH33	GH33	GH
Prodigal_4274|LOCUS_36340	-	GH43_18(76-325)	GH43_e233	3	L_metabat_L.95.fa	Planctomycetaceae	34	C	GH43	GH43	GH43	GH43	GH	GH43
Prodigal_1991|LOCUS_18020	-	GH5(64-332)	GH5_e110	3	L_metabat_L.95.fa	Planctomycetaceae	34	C	GH5	GH5	GH5	GH5	GH	GH5
Prodigal_26|LOCUS_00260	-	GH57(8-296)	GH57_e35	3	L_metabat_L.95.fa	Planctomycetaceae	34	C	GH57	GH57	GH57	GH57	GH
Prodigal_1834|LOCUS_16700	2.4.1.25:1	GH77(24-507)	GH77_e23	3	L_metabat_L.95.fa	Planctomycetaceae	34	C	GH77	GH77	GH77	GH77	GH
Prodigal_3089|LOCUS_27180	-	PL10_3(122-389)	PL10_e12	3	L_metabat_L.95.fa	Planctomycetaceae	34	C	PL10	PL10	PL10	PL10	PL	PL10
Prodigal_5216|LOCUS_42620	-	PL10_3(122-392)	PL10_e12	3	L_metabat_L.95.fa	Planctomycetaceae	34	C	PL10	PL10	PL10	PL10	PL	PL10
Prodigal_879|LOCUS_08170	-	PL6(36-367)	PL6_e19	3	L_metabat_L.95.fa	Planctomycetaceae	34	C	PL6	PL6	PL6	PL6	PL	PL6
Prodigal_580|LOCUS_05430	4.2.2.-:1	PL9_4(105-244)	PL9_e37	3	L_metabat_L.95.fa	Planctomycetaceae	34	C	PL9	PL9	PL9	PL9	PL
Prodigal_730|LOCUS_06320	-	-	CBM50_e974	2	C_metabat_C.81.fa	Promineofilaceae (a)	49	E	CBM50		CBM50	CBM50	CBM
Prodigal_674|LOCUS_05850	-|-	CBM61(90-227)+GH53(236-568)	CBM61_e14+GH53_e27	3	C_metabat_C.81.fa	Promineofilaceae (a)	49	E	CBM61	CBM61	CBM61	CBM61	CBM
Prodigal_1588|LOCUS_12740	-	CE14(9-114)	CE14_e41	2	C_metabat_C.81.fa	Promineofilaceae (a)	49	E		CE14	CE14	CE14	CE	CE14
Prodigal_2013|LOCUS_15610	-	CE4(54-179)	CE4_e274	2	C_metabat_C.81.fa	Promineofilaceae (a)	49	E		CE4	CE4	CE4	CE	CE4
Prodigal_330|LOCUS_02960	-	CE4(40-149)	CE4_e56	2	C_metabat_C.81.fa	Promineofilaceae (a)	49	E		CE4	CE4	CE4	CE	CE4
Prodigal_2746|LOCUS_20120	2.4.1.4:1	GH13_4(118-517)	GH13_e83	3	C_metabat_C.81.fa	Promineofilaceae (a)	49	E	GH13	GH13	GH13	GH13	GH
Prodigal_417|LOCUS_03720	2.4.1.352:2	GH13_18(72-415)	GH13_e137	3	C_metabat_C.81.fa	Promineofilaceae (a)	49	E	GH13	GH13	GH13	GH13	GH
Prodigal_424|LOCUS_03780	-	GH23(714-843)	GH23_e609	3	C_metabat_C.81.fa	Promineofilaceae (a)	49	E	GH23	GH23	GH23	GH23	GH
Prodigal_416|LOCUS_03710	-	GH31_15(174-599)	GH31_e77	3	C_metabat_C.81.fa	Promineofilaceae (a)	49	E	GH31	GH31	GH31	GH31	GH
Prodigal_1822|LOCUS_14390	-	GH39(133-426)	GH39_e122	3	C_metabat_C.81.fa	Promineofilaceae (a)	49	E	GH39	GH39	GH39	GH39	GH
Prodigal_2283|LOCUS_17330	-	GH39(47-303)	GH39_e42	3	C_metabat_C.81.fa	Promineofilaceae (a)	49	E	GH39	GH39	GH39	GH39	GH
Prodigal_996|LOCUS_08470	-	GH39(181-427)	GH39_e122	3	C_metabat_C.81.fa	Promineofilaceae (a)	49	E	GH39	GH39	GH39	GH39	GH
Prodigal_1068|LOCUS_08970	-	GH4(3-181)	GH4_e10	3	C_metabat_C.81.fa	Promineofilaceae (a)	49	E	GH4	GH4	GH4	GH4	GH
Prodigal_2904|LOCUS_24750	1.1.3.-:1	AA7(34-461)	AA7_e0	2	LW_metabat_LW.17.fa	Promineofilaceae (b)	40	D		AA7	AA7	AA7	AA	AA7
Prodigal_2085|LOCUS_18250	3.2.1.1:12|3.2.1.41:11|3.2.1.1:12|3.2.1.41:11|-|-|-	CBM34(452-579)+GH13_39(650-1002)	CBM20_e9+CBM20_e9+CBM34_e12+GH13_e175+CBM20_e6	3	LW_metabat_LW.17.fa	Promineofilaceae (b)	40	D	CBM20	CBM34	CBM20	CBM20	CBM
Prodigal_1219|LOCUS_11040	3.2.1.68:75|2.4.1.25:4|3.2.1.-:1|3.2.1.68:15|3.2.1.-:1	GH13_11(182-536)	CBM48_e3+GH13_e48	3	LW_metabat_LW.17.fa	Promineofilaceae (b)	40	D	CBM48	GH13	CBM48	CBM48	CBM
Prodigal_1872|LOCUS_16460	-|-|-	CBM50(93-136)	CBM50_e989+CBM50_e386+GH39_e104	3	LW_metabat_LW.17.fa	Promineofilaceae (b)	40	D	CBM50	CBM50	CBM50	CBM50	CBM
Prodigal_1791|LOCUS_15790	-	CBM9(436-620)	CBM9_e19	2	LW_metabat_LW.17.fa	Promineofilaceae (b)	40	D		CBM9	CBM9	CBM9	CBM	CBM9
Prodigal_706|LOCUS_06500	-	CBM9(114-311)	CBM9_e7	2	LW_metabat_LW.17.fa	Promineofilaceae (b)	40	D		CBM9	CBM9	CBM9	CBM	CBM9
Prodigal_125|LOCUS_01170	-	CE1(145-365)	CE1_e22	2	LW_metabat_LW.17.fa	Promineofilaceae (b)	40	D		CE1	CE1	CE1	CE	CE1
Prodigal_149|LOCUS_01390	-	CE1(13-253)	CE1_e38	2	LW_metabat_LW.17.fa	Promineofilaceae (b)	40	D		CE1	CE1	CE1	CE	CE1
Prodigal_2884|LOCUS_24600	-	CE1(100-321)	CE1_e22	2	LW_metabat_LW.17.fa	Promineofilaceae (b)	40	D		CE1	CE1	CE1	CE	CE1
Prodigal_1606|LOCUS_14240	-	CE14(8-138)	CE14_e34	2	LW_metabat_LW.17.fa	Promineofilaceae (b)	40	D		CE14	CE14	CE14	CE	CE14
Prodigal_4689|LOCUS_36850	-	CE14(42-149)	CE14_e51	2	LW_metabat_LW.17.fa	Promineofilaceae (b)	40	D		CE14	CE14	CE14	CE	CE14
Prodigal_1141|LOCUS_10350	-	CE4(210-334)	CE4_e274	2	LW_metabat_LW.17.fa	Promineofilaceae (b)	40	D		CE4	CE4	CE4	CE	CE4
Prodigal_353|LOCUS_03290	-	CE4(130-255)	CE4_e346	2	LW_metabat_LW.17.fa	Promineofilaceae (b)	40	D		CE4	CE4	CE4	CE	CE4
Prodigal_3617|LOCUS_30060	3.5.1.41:1	-	CE4_e177	2	LW_metabat_LW.17.fa	Promineofilaceae (b)	40	D	CE4		CE4	CE4	CE	CE4
Prodigal_225|LOCUS_02080	-	GH1(3-409)	GH1_e74	3	LW_metabat_LW.17.fa	Promineofilaceae (b)	40	D	GH1	GH1	GH1	GH1	GH	GH1
Prodigal_753|LOCUS_06910	-	GH109(1-157)	GH109_e7	2	LW_metabat_LW.17.fa	Promineofilaceae (b)	40	D		GH109	GH109	GH109	GH
Prodigal_1062|LOCUS_09680	-	GH13_20(214-502)	GH13_e189	3	LW_metabat_LW.17.fa	Promineofilaceae (b)	40	D	GH13	GH13	GH13	GH13	GH
Prodigal_2014|LOCUS_17680	2.4.1.352:2	GH13_18(79-422)	GH13_e137	3	LW_metabat_LW.17.fa	Promineofilaceae (b)	40	D	GH13	GH13	GH13	GH13	GH
Prodigal_2179|LOCUS_19020	3.2.1.1:2|3.2.1.-:1	GH13_24(99-372)	GH13_e23	3	LW_metabat_LW.17.fa	Promineofilaceae (b)	40	D	CBM20	GH13	GH13	GH13	GH
Prodigal_405|LOCUS_03770	2.4.1.319:4|2.4.1.320:2	GH130_2(17-313)	GH130_e13	3	LW_metabat_LW.17.fa	Promineofilaceae (b)	40	D	GH130	GH130	GH130	GH130	GH
Prodigal_3886|LOCUS_31930	-	GH133(295-646)	GH133_e2	3	LW_metabat_LW.17.fa	Promineofilaceae (b)	40	D	GH133	GH133	GH133	GH133	GH
Prodigal_27|LOCUS_00250	-	GH149(24-1153)	GH149_e1	3	LW_metabat_LW.17.fa	Promineofilaceae (b)	40	D	GH149	GH149	GH149	GH149	GH
Prodigal_29|LOCUS_00270	-	GH16_3(19-269)	GH16_e70	2	LW_metabat_LW.17.fa	Promineofilaceae (b)	40	D		GH16	GH16	GH16	GH	GH16
Prodigal_30|LOCUS_00280	3.2.1.39:2	GH16_3(72-306)	GH16_e325	3	LW_metabat_LW.17.fa	Promineofilaceae (b)	40	D	GH16	GH16	GH16	GH16	GH	GH16
Prodigal_838|LOCUS_07700	-	GH23(107-205)	GH23_e153	2	LW_metabat_LW.17.fa	Promineofilaceae (b)	40	D		GH23	GH23	GH23	GH
Prodigal_1451|LOCUS_12970	-	GH3(145-398)	GH3_e224	3	LW_metabat_LW.17.fa	Promineofilaceae (b)	40	D	GH3	GH3	GH3	GH3	GH	GH3
Prodigal_28|LOCUS_00260	3.2.1.-:5|3.2.1.21:3	GH3(50-291)	GH3_e107	3	LW_metabat_LW.17.fa	Promineofilaceae (b)	40	D	GH3	GH3	GH3	GH3	GH	GH3
Prodigal_319|LOCUS_02950	3.2.1.21:2|3.2.1.126:1|3.2.1.37:1	GH3(29-242)	GH3_e175	3	LW_metabat_LW.17.fa	Promineofilaceae (b)	40	D	GH3	GH3	GH3	GH3	GH	GH3
Prodigal_406|LOCUS_03780	3.2.1.21:3|3.2.1.74:3|3.2.1.-:3|3.2.1.6:2|3.2.1.155:1	GH3(90-334)	GH3_e227	3	LW_metabat_LW.17.fa	Promineofilaceae (b)	40	D	GH3	GH3	GH3	GH3	GH	GH3
Prodigal_2744|LOCUS_23500	-	GH31_15(112-537)	GH31_e77	3	LW_metabat_LW.17.fa	Promineofilaceae (b)	40	D	GH31	GH31	GH31	GH31	GH
Prodigal_1197|LOCUS_10860	-	GH39(98-371)	GH39_e107	3	LW_metabat_LW.17.fa	Promineofilaceae (b)	40	D	GH39	GH39	GH39	GH39	GH
Prodigal_2193|LOCUS_19140	-	GH39(99-380)	GH39_e69	3	LW_metabat_LW.17.fa	Promineofilaceae (b)	40	D	GH39	GH39	GH39	GH39	GH
Prodigal_3218|LOCUS_27120	-	GH39(118-415)	GH39_e69	3	LW_metabat_LW.17.fa	Promineofilaceae (b)	40	D	GH39	GH39	GH39	GH39	GH
Prodigal_685|LOCUS_06300	-	GH39(160-442)	GH39_e122	3	LW_metabat_LW.17.fa	Promineofilaceae (b)	40	D	GH39	GH39	GH39	GH39	GH
Prodigal_1599|LOCUS_14170	-	-	GH39_e66	2	LW_metabat_LW.17.fa	Promineofilaceae (b)	40	D	GH39		GH39	GH39	GH
Prodigal_2113|LOCUS_18480	3.2.1.22:9	GH4(4-182)	GH4_e17	3	LW_metabat_LW.17.fa	Promineofilaceae (b)	40	D	GH4	GH4	GH4	GH4	GH
Prodigal_964|LOCUS_08810	-	GH4(5-182)	GH4_e8	3	LW_metabat_LW.17.fa	Promineofilaceae (b)	40	D	GH4	GH4	GH4	GH4	GH
Prodigal_1369|LOCUS_12290	-	GH51_3(209-500)	GH51_e38	2	LW_metabat_LW.17.fa	Promineofilaceae (b)	40	D		GH51	GH51	GH51	GH	GH51
Prodigal_1700|LOCUS_15010	2.4.1.25:8	GH57(12-259)	GH57_e38	2	LW_metabat_LW.17.fa	Promineofilaceae (b)	40	D		GH57	GH57	GH57	GH
Prodigal_2733|LOCUS_23430	-	GH63(76-408)	GH63_e19	3	LW_metabat_LW.17.fa	Promineofilaceae (b)	40	D	GH63	GH63	GH63	GH63	GH
Prodigal_3464|LOCUS_28930	-	GH99(85-340)	GH99_e6	2	LW_metabat_LW.17.fa	Promineofilaceae (b)	40	D		GH99	GH99	GH99	GH
Prodigal_1212|LOCUS_11280	1.14.99.53:1	AA10(33-200)	AA10_e19	2	C_metabat_C.7.fa	Pseudonocardiaceae	46	E		AA10	AA10	AA10	AA	AA10
Prodigal_1727|LOCUS_15970	-	AA3_2(4-500)	AA3_e4	2	C_metabat_C.7.fa	Pseudonocardiaceae	46	E		AA3	AA3	AA3	AA	AA3
Prodigal_618|LOCUS_05820	-	AA3_2(7-316)	AA3_e4	3	C_metabat_C.7.fa	Pseudonocardiaceae	46	E	AA3	AA3	AA3	AA3	AA	AA3
Prodigal_3552|LOCUS_31440	1.1.3.-:1	AA7(44-473)	AA7_e0	2	C_metabat_C.7.fa	Pseudonocardiaceae	46	E		AA7	AA7	AA7	AA	AA7
Prodigal_3710|LOCUS_32650	1.1.3.-:1	AA7(154-576)	AA7_e0	2	C_metabat_C.7.fa	Pseudonocardiaceae	46	E		AA7	AA7	AA7	AA	AA7
Prodigal_2388|LOCUS_21820	-	CBM6(922-1048)	CBM6_e66	3	C_metabat_C.7.fa	Pseudonocardiaceae	46	E	CBM6	CBM6	CBM6	CBM6	CBM	CBM6
Prodigal_1570|LOCUS_14590	-	CE1(52-251)	CE1_e41	3	C_metabat_C.7.fa	Pseudonocardiaceae	46	E	CE1	CE1	CE1	CE1	CE	CE1
Prodigal_1605|LOCUS_14890	3.5.1.89:6	CE14(2-121)	CE14_e2	2	C_metabat_C.7.fa	Pseudonocardiaceae	46	E		CE14	CE14	CE14	CE	CE14
Prodigal_2033|LOCUS_18710	-	CE14(9-115)	CE14_e39	2	C_metabat_C.7.fa	Pseudonocardiaceae	46	E		CE14	CE14	CE14	CE	CE14
Prodigal_239|LOCUS_02250	-	CE14(16-121)	CE14_e39	2	C_metabat_C.7.fa	Pseudonocardiaceae	46	E		CE14	CE14	CE14	CE	CE14
Prodigal_4246|LOCUS_36540	3.5.1.115:3	CE14(8-142)	CE14_e1	3	C_metabat_C.7.fa	Pseudonocardiaceae	46	E	CE14	CE14	CE14	CE14	CE	CE14
Prodigal_1958|LOCUS_18020	-	CE4(78-214)	CE4_e233	2	C_metabat_C.7.fa	Pseudonocardiaceae	46	E		CE4	CE4	CE4	CE	CE4
Prodigal_3390|LOCUS_30220	3.5.1.25:3	CE9(61-426)	CE9_e105	3	C_metabat_C.7.fa	Pseudonocardiaceae	46	E	CE9	CE9	CE9	CE9	CE	CE9
Prodigal_1245|LOCUS_11590	3.2.1.20:2	GH13_30(35-397)	GH13_e234	3	C_metabat_C.7.fa	Pseudonocardiaceae	46	E	GH13	GH13	GH13	GH13	GH
Prodigal_3265|LOCUS_29200	3.2.1.20:2	GH13(40-283)	GH13_e234	3	C_metabat_C.7.fa	Pseudonocardiaceae	46	E	GH0	GH13	GH13	GH13	GH
Prodigal_1757|LOCUS_16210	3.2.1.3:1	GH15(237-603)	GH15_e59	3	C_metabat_C.7.fa	Pseudonocardiaceae	46	E	GH15	GH15	GH15	GH15	GH
Prodigal_2461|LOCUS_22470	-	GH16_3(42-301)	GH16_e99	3	C_metabat_C.7.fa	Pseudonocardiaceae	46	E	GH16	GH16	GH16	GH16	GH	GH16
Prodigal_1149|LOCUS_10720	-	GH171(57-425)	GH171_e1	3	C_metabat_C.7.fa	Pseudonocardiaceae	46	E	GH171	GH171	GH171	GH171	GH
Prodigal_1120|LOCUS_10450	-	GH18(134-360)	GH18_e110	3	C_metabat_C.7.fa	Pseudonocardiaceae	46	E	GH18	GH18	GH18	GH18	GH
Prodigal_19|LOCUS_00180	-	GH18(54-450)	GH18_e427	3	C_metabat_C.7.fa	Pseudonocardiaceae	46	E	GH18	GH18	GH18	GH18	GH
Prodigal_2816|LOCUS_25450	3.2.1.14:5|3.2.1.-:1	GH18(46-322)	GH18_e327	3	C_metabat_C.7.fa	Pseudonocardiaceae	46	E	GH18	GH18	GH18	GH18	GH
Prodigal_2960|LOCUS_26670	-	GH183(13-320)	-	2	C_metabat_C.7.fa	Pseudonocardiaceae	46	E	GH183	GH183		GH183	GH
Prodigal_1895|LOCUS_17440	-	GH184(68-176)	-	2	C_metabat_C.7.fa	Pseudonocardiaceae	46	E	GH184	GH184		GH184	GH
Prodigal_2975|LOCUS_26790	3.2.1.23:1|3.2.1.23:35	GH2(92-1183)	GH2_e70+GH2_e1	3	C_metabat_C.7.fa	Pseudonocardiaceae	46	E	GH2	GH2	GH2	GH2	GH	GH2
Prodigal_4120|LOCUS_35660	3.2.1.52:6	GH20(191-510)	GH20_e114	3	C_metabat_C.7.fa	Pseudonocardiaceae	46	E	GH20	GH20	GH20	GH20	GH
Prodigal_508|LOCUS_04820	-	GH23(110-248)	GH23_e632	2	C_metabat_C.7.fa	Pseudonocardiaceae	46	E		GH23	GH23	GH23	GH
Prodigal_514|LOCUS_04880	-	GH23(127-269)	GH23_e328	2	C_metabat_C.7.fa	Pseudonocardiaceae	46	E		GH23	GH23	GH23	GH
Prodigal_515|LOCUS_04890	-	GH23(146-291)	GH23_e430	2	C_metabat_C.7.fa	Pseudonocardiaceae	46	E		GH23	GH23	GH23	GH
Prodigal_2513|LOCUS_22910	3.2.1.17:1	GH25(29-206)	GH25_e46	3	C_metabat_C.7.fa	Pseudonocardiaceae	46	E	GH25	GH25	GH25	GH25	GH
Prodigal_3859|LOCUS_33730	3.2.1.17:4	GH25(87-271)	GH25_e51	2	C_metabat_C.7.fa	Pseudonocardiaceae	46	E		GH25	GH25	GH25	GH
Prodigal_624|LOCUS_05880	-	GH25(264-446)	GH25_e87	2	C_metabat_C.7.fa	Pseudonocardiaceae	46	E		GH25	GH25	GH25	GH
Prodigal_1150|LOCUS_10730	3.2.1.52:4	GH3(135-372)	GH3_e199	3	C_metabat_C.7.fa	Pseudonocardiaceae	46	E	GH3	GH3	GH3	GH3	GH	GH3
Prodigal_1339|LOCUS_12500	-	GH3(110-332)	GH3_e77	3	C_metabat_C.7.fa	Pseudonocardiaceae	46	E	GH3	GH3	GH3	GH3	GH	GH3
Prodigal_357|LOCUS_03380	3.2.1.37:4	GH3(99-321)	GH3_e50	3	C_metabat_C.7.fa	Pseudonocardiaceae	46	E	GH3	GH3	GH3	GH3	GH	GH3
Prodigal_1673|LOCUS_15490	-	GH31_2(234-690)	GH31_e60	3	C_metabat_C.7.fa	Pseudonocardiaceae	46	E	GH31	GH31	GH31	GH31	GH
Prodigal_735|LOCUS_06890	3.2.1.80:10|3.2.1.65:10|3.2.1.26:7|3.2.1.153:5|3.2.1.64:3|2.4.1.99:3	GH32(67-374)	GH32_e16	3	C_metabat_C.7.fa	Pseudonocardiaceae	46	E	GH32	GH32	GH32	GH32	GH
Prodigal_642|LOCUS_06040	-	GH33(47-357)	GH33_e0	3	C_metabat_C.7.fa	Pseudonocardiaceae	46	E	GH33	GH33	GH33	GH33	GH
Prodigal_2850|LOCUS_25740	3.2.1.24:5	GH38(143-406)	GH38_e38	3	C_metabat_C.7.fa	Pseudonocardiaceae	46	E	GH38	GH38	GH38	GH38	GH
Prodigal_2696|LOCUS_24420	-	GH43_23(50-251)	GH43_e176	2	C_metabat_C.7.fa	Pseudonocardiaceae	46	E		GH43	GH43	GH43	GH	GH43
Prodigal_771|LOCUS_07350	-	AA6(2-200)	AA6_e3	2	LW_metabat_LW.105.fa	QNYZ01	35	D		AA6	AA6	AA6	AA	AA6
Prodigal_615|LOCUS_05890	3.5.1.108:18	CE11(24-293)	CE11_e22	3	LW_metabat_LW.105.fa	QNYZ01	35	D	CE11	CE11	CE11	CE11	CE	CE11
Prodigal_226|LOCUS_02180	-	GH102(234-390)	GH102_e24	3	LW_metabat_LW.105.fa	QNYZ01	35	D	GH102	GH102	GH102	GH102	GH	GH102
Prodigal_1300|LOCUS_12130	-	GH103(43-266)	GH103_e24	2	LW_metabat_LW.105.fa	QNYZ01	35	D		GH103	GH103	GH103	GH
Prodigal_349|LOCUS_03350	-|-	GH13_3(185-365)+GH133(1053-1425)	GH13_e43+GH133_e6	3	LW_metabat_LW.105.fa	QNYZ01	35	D	GH13	GH13	GH13	GH13	GH
Prodigal_353|LOCUS_03390	2.4.1.18:166|2.4.1.18:50	GH13_8(224-515)	CBM48_e32+GH13_e20	3	LW_metabat_LW.105.fa	QNYZ01	35	D	GH13	GH13	CBM48	GH13	GH
Prodigal_802|LOCUS_07630	2.4.1.352:2	GH13_18(76-419)	GH13_e137	3	LW_metabat_LW.105.fa	QNYZ01	35	D	GH13	GH13	GH13	GH13	GH
Prodigal_1306|LOCUS_12190	-|-|-|-	GH23(188-323)	GH23_e851+CBM50_e868+CBM50_e207+CBM50_e868	3	LW_metabat_LW.105.fa	QNYZ01	35	D	CBM50	GH23	GH23	GH23	GH
Prodigal_1322|LOCUS_12330	-	GH23(1-145)	GH23_e170	2	LW_metabat_LW.105.fa	QNYZ01	35	D		GH23	GH23	GH23	GH
Prodigal_1388|LOCUS_12900	-|-	GH23(103-244)	GH23_e710+CBM50_e295	3	LW_metabat_LW.105.fa	QNYZ01	35	D	CBM50	GH23	GH23	GH23	GH
Prodigal_605|LOCUS_05790	-	GH23(90-194)	GH23_e683	2	LW_metabat_LW.105.fa	QNYZ01	35	D		GH23	GH23	GH23	GH
Prodigal_1921|LOCUS_17480	-	AA3_2(3-529)	AA3_e57	3	L_metabat_L.18.fa	Rhodobacteraceae	26	C	AA3	AA3	AA3	AA3	AA	AA3
Prodigal_3495|LOCUS_29980	-	AA6(4-189)	AA6_e2	2	L_metabat_L.18.fa	Rhodobacteraceae	26	C		AA6	AA6	AA6	AA	AA6
Prodigal_3124|LOCUS_27330	1.1.3.-:1	AA7(28-457)	AA7_e0	2	L_metabat_L.18.fa	Rhodobacteraceae	26	C		AA7	AA7	AA7	AA	AA7
Prodigal_157|LOCUS_01500	2.4.1.18:57|2.4.1.18:14	CBM48(124-207)+GH13_9(280-580)	CBM48_e2+GH13_e200	3	L_metabat_L.18.fa	Rhodobacteraceae	26	C	CBM48	CBM48	CBM48	CBM48	CBM
Prodigal_160|LOCUS_01530	3.2.1.68:75|2.4.1.25:4|3.2.1.-:1|3.2.1.68:15|3.2.1.-:1	CBM48(14-104)+GH13_11(183-531)	CBM48_e3+GH13_e48	3	L_metabat_L.18.fa	Rhodobacteraceae	26	C	CBM48	CBM48	CBM48	CBM48	CBM
Prodigal_105|LOCUS_00990	3.1.1.72:1|3.2.1.8:1	CE1(55-204)	CE1_e24	2	L_metabat_L.18.fa	Rhodobacteraceae	26	C		CE1	CE1	CE1	CE	CE1
Prodigal_1349|LOCUS_12430	-	CE1(108-255)	CE1_e19	2	L_metabat_L.18.fa	Rhodobacteraceae	26	C		CE1	CE1	CE1	CE	CE1
Prodigal_348|LOCUS_03250	-	CE11(2-273)	CE11_e5	3	L_metabat_L.18.fa	Rhodobacteraceae	26	C	CE11	CE11	CE11	CE11	CE	CE11
Prodigal_982|LOCUS_09130	3.5.1.41:1	-	CE4_e177	2	L_metabat_L.18.fa	Rhodobacteraceae	26	C	CE4		CE4	CE4	CE	CE4
Prodigal_1628|LOCUS_14910	-	CE9(10-369)	CE9_e55	3	L_metabat_L.18.fa	Rhodobacteraceae	26	C	CE9	CE9	CE9	CE9	CE	CE9
Prodigal_1182|LOCUS_10930	-	GH1(5-437)	GH1_e110	3	L_metabat_L.18.fa	Rhodobacteraceae	26	C	GH1	GH1	GH1	GH1	GH	GH1
Prodigal_1848|LOCUS_16810	-	GH103(42-335)	GH103_e38	3	L_metabat_L.18.fa	Rhodobacteraceae	26	C	GH103	GH103	GH103	GH103	GH
Prodigal_2458|LOCUS_22070	-	GH103(61-354)	GH103_e38	3	L_metabat_L.18.fa	Rhodobacteraceae	26	C	GH103	GH103	GH103	GH103	GH
Prodigal_523|LOCUS_04910	-	GH103(30-322)	GH103_e30	3	L_metabat_L.18.fa	Rhodobacteraceae	26	C	GH103	GH103	GH103	GH103	GH
Prodigal_952|LOCUS_08860	-	GH103(115-316)	GH103_e15	2	L_metabat_L.18.fa	Rhodobacteraceae	26	C		GH103	GH103	GH103	GH
Prodigal_203|LOCUS_01910	-	GH108(245-330)	GH108_e29	3	L_metabat_L.18.fa	Rhodobacteraceae	26	C	GH108	GH108	GH108	GH108	GH
Prodigal_662|LOCUS_06220	-	GH108(258-342)	GH108_e68	3	L_metabat_L.18.fa	Rhodobacteraceae	26	C	GH108	GH108	GH108	GH108	GH
Prodigal_57|LOCUS_00550	-	GH109(2-165)	GH109_e7	2	L_metabat_L.18.fa	Rhodobacteraceae	26	C		GH109	GH109	GH109	GH
Prodigal_1187|LOCUS_10980	3.2.1.20:1	GH13_23(45-392)	GH13_e140	3	L_metabat_L.18.fa	Rhodobacteraceae	26	C	GH13	GH13	GH13	GH13	GH
Prodigal_1266|LOCUS_11690	-	GH13_18(62-402)	GH13_e237	3	L_metabat_L.18.fa	Rhodobacteraceae	26	C	GH13	GH13	GH13	GH13	GH
Prodigal_2774|LOCUS_24570	3.2.1.20:1	GH13_23(35-380)	GH13_e140	3	L_metabat_L.18.fa	Rhodobacteraceae	26	C	GH13	GH13	GH13	GH13	GH
Prodigal_3565|LOCUS_30480	-	GH15(44-419)	GH15_e36	3	L_metabat_L.18.fa	Rhodobacteraceae	26	C	GH15	GH15	GH15	GH15	GH
Prodigal_1360|LOCUS_12540	-	GH23(121-228)	GH23_e236	2	L_metabat_L.18.fa	Rhodobacteraceae	26	C		GH23	GH23	GH23	GH
Prodigal_2722|LOCUS_24160	-	GH23(492-617)	GH23_e690	3	L_metabat_L.18.fa	Rhodobacteraceae	26	C	GH23	GH23	GH23	GH23	GH
Prodigal_649|LOCUS_06100	-	GH23(92-193)	GH23_e673	2	L_metabat_L.18.fa	Rhodobacteraceae	26	C		GH23	GH23	GH23	GH
Prodigal_590|LOCUS_05540	-	GH25(64-242)	GH25_e187	3	L_metabat_L.18.fa	Rhodobacteraceae	26	C	GH25	GH25	GH25	GH25	GH
Prodigal_2274|LOCUS_20510	-	GH3(56-277)	GH3_e228	3	L_metabat_L.18.fa	Rhodobacteraceae	26	C	GH3	GH3	GH3	GH3	GH	GH3
Prodigal_2184|LOCUS_19720	-	-	GH33_e128	2	L_metabat_L.18.fa	Rhodobacteraceae	26	C	GH33		GH33	GH33	GH
Prodigal_1697|LOCUS_15490	3.2.1.28:18	GH37(21-478)	GH37_e6	3	L_metabat_L.18.fa	Rhodobacteraceae	26	C	GH37	GH37	GH37	GH37	GH
Prodigal_1959|LOCUS_17800	-	GH8(44-357)	GH8_e17	2	L_metabat_L.18.fa	Rhodobacteraceae	26	C		GH8	GH8	GH8	GH	GH8
Prodigal_1137|LOCUS_08880	1.10.3.2:4|1.10.3.-:1	AA1(43-557)	AA1_e46	2	L_metabat_L.41.fa	RKRQ01	51	E		AA1	AA1	AA1	AA	AA1
Prodigal_832|LOCUS_06760	3.2.1.68:75|2.4.1.25:4|3.2.1.-:1|3.2.1.68:15|3.2.1.-:1	CBM48(19-108)+GH13_11(188-541)	CBM48_e3+GH13_e48	3	L_metabat_L.41.fa	RKRQ01	51	E	CBM48	CBM48	CBM48	CBM48	CBM
Prodigal_185|LOCUS_01640	3.2.1.17:12|4.2.2.n1:6	GH23(153-264)	GH23_e335	2	L_metabat_L.41.fa	RKRQ01	51	E		GH23	GH23	GH23	GH
Prodigal_295|LOCUS_02540	-|-|-|-	GH23(153-286)	GH23_e450+CBM50_e376+CBM50_e232+CBM50_e671	2	L_metabat_L.41.fa	RKRQ01	51	E		GH23	GH23	GH23	GH
Prodigal_363|LOCUS_03130	-	GH23(107-229)	GH23_e151	2	L_metabat_L.41.fa	RKRQ01	51	E		GH23	GH23	GH23	GH
Prodigal_797|LOCUS_06570	1.1.3.-:1	AA7(30-456)	AA7_e0	2	CW_metabat_CW.108.fa	RKRQ02 (a)	54	E		AA7	AA7	AA7	AA	AA7
Prodigal_380|LOCUS_03330	3.2.1.68:75|2.4.1.25:4|3.2.1.-:1|3.2.1.68:15|3.2.1.-:1	CBM48(23-112)+GH13_11(192-545)	CBM48_e3+GH13_e48	3	CW_metabat_CW.108.fa	RKRQ02 (a)	54	E	CBM48	CBM48	CBM48	CBM48	CBM
Prodigal_381|LOCUS_03340	2.4.1.18:57|2.4.1.18:14	CBM48(35-122)+GH13_9(191-491)	CBM48_e2+GH13_e200	3	CW_metabat_CW.108.fa	RKRQ02 (a)	54	E	CBM48	CBM48	CBM48	CBM48	CBM
Prodigal_298|LOCUS_02640	3.5.1.105:5	CE14(6-117)	CE14_e11	2	CW_metabat_CW.108.fa	RKRQ02 (a)	54	E		CE14	CE14	CE14	CE	CE14
Prodigal_378|LOCUS_03320	-	GH13_3(221-440)	GH13_e41	3	CW_metabat_CW.108.fa	RKRQ02 (a)	54	E	GH13	GH13	GH13	GH13	GH
Prodigal_1010|LOCUS_08110	-	GH23(528-652)	GH23_e953	2	CW_metabat_CW.108.fa	RKRQ02 (a)	54	E		GH23	GH23	GH23	GH
Prodigal_1125|LOCUS_08940	-	GH77(10-496)	GH77_e17	3	CW_metabat_CW.108.fa	RKRQ02 (a)	54	E	GH77	GH77	GH77	GH77	GH
Prodigal_409|LOCUS_03640	1.10.3.2:4|1.10.3.-:1	AA1(43-518)	AA1_e46	2	P_metabat_P.37.fa	RKRQ02 (b)	10	B		AA1	AA1	AA1	AA	AA1
Prodigal_1305|LOCUS_10760	-	AA4(22-233)	AA4_e1	2	P_metabat_P.37.fa	RKRQ02 (b)	10	B		AA4	AA4	AA4	AA	AA4
Prodigal_160|LOCUS_01440	-	GH152(177-500)	GH152_e13	2	P_metabat_P.37.fa	RKRQ02 (b)	10	B		GH152	GH152	GH152	GH
Prodigal_1110|LOCUS_09290	-	GH23(523-648)	GH23_e953	2	P_metabat_P.37.fa	RKRQ02 (b)	10	B		GH23	GH23	GH23	GH
Prodigal_1429|LOCUS_11620	-	GH23(163-278)	GH23_e958	2	P_metabat_P.37.fa	RKRQ02 (b)	10	B		GH23	GH23	GH23	GH
Prodigal_30|LOCUS_00280	-	GH23(98-211)	GH23_e624	2	P_metabat_P.37.fa	RKRQ02 (b)	10	B		GH23	GH23	GH23	GH
Prodigal_727|LOCUS_06190	-	AA3_2(3-530)	AA3_e57	3	P_metabat_P.121.fa	RKSH01	70	F	AA3	AA3	AA3	AA3	AA	AA3
Prodigal_1413|LOCUS_11390	1.1.3.-:1	AA7(47-471)	AA7_e0	2	P_metabat_P.121.fa	RKSH01	70	F		AA7	AA7	AA7	AA	AA7
Prodigal_1883|LOCUS_14430	-|-	CBM61(32-164)+GH53(174-505)	CBM61_e14+GH53_e27	3	P_metabat_P.121.fa	RKSH01	70	F	CBM61	CBM61	CBM61	CBM61	CBM
Prodigal_441|LOCUS_03820	3.5.1.108:18	CE11(42-313)	CE11_e22	3	P_metabat_P.121.fa	RKSH01	70	F	CE11	CE11	CE11	CE11	CE	CE11
Prodigal_262|LOCUS_02310	-	CE4(54-165)	CE4_e54	2	P_metabat_P.121.fa	RKSH01	70	F		CE4	CE4	CE4	CE	CE4
Prodigal_603|LOCUS_05190	-	GH102(145-250)	GH102_e18	2	P_metabat_P.121.fa	RKSH01	70	F		GH102	GH102	GH102	GH	GH102
Prodigal_1045|LOCUS_08670	-	GH103(34-323)	GH103_e12	2	P_metabat_P.121.fa	RKSH01	70	F		GH103	GH103	GH103	GH
Prodigal_1863|LOCUS_14300	-	GH23(369-510)	GH23_e830	3	P_metabat_P.121.fa	RKSH01	70	F	GH23	GH23	GH23	GH23	GH
Prodigal_226|LOCUS_01990	-	GH23(345-489)	GH23_e638	3	P_metabat_P.121.fa	RKSH01	70	F	GH23	GH23	GH23	GH23	GH
Prodigal_1621|LOCUS_12160	1.10.3.2:1	AA1(60-481)	AA1_e26	2	maxbin_P.068.fasta	SG8-13 (a)	38	D		AA1	AA1	AA1	AA	AA1
Prodigal_2602|LOCUS_17020	-	GH103(35-262)	GH103_e24	2	maxbin_P.068.fasta	SG8-13 (a)	38	D		GH103	GH103	GH103	GH
Prodigal_93|LOCUS_00800	2.4.1.18:166|2.4.1.18:50	GH13_8(217-508)	CBM48_e32+GH13_e20	3	maxbin_P.068.fasta	SG8-13 (a)	38	D	GH13	GH13	CBM48	GH13	GH
Prodigal_999|LOCUS_08000	-	GH13_3(237-457)	GH13_e41	3	maxbin_P.068.fasta	SG8-13 (a)	38	D	GH13	GH13	GH13	GH13	GH
Prodigal_2021|LOCUS_14330	-	GH19(40-135)	GH19_e137	2	maxbin_P.068.fasta	SG8-13 (a)	38	D		GH19	GH19	GH19	GH
Prodigal_241|LOCUS_02090	-|-	GH23(160-287)	GH23_e766+CBM50_e218	3	maxbin_P.068.fasta	SG8-13 (a)	38	D	CBM50	GH23	GH23	GH23	GH
Prodigal_92|LOCUS_00790	-	GH23(91-199)	GH23_e683	2	maxbin_P.068.fasta	SG8-13 (a)	38	D		GH23	GH23	GH23	GH
Prodigal_2633|LOCUS_17150	-	GH3(55-272)	GH3_e205	3	maxbin_P.068.fasta	SG8-13 (a)	38	D	GH3	GH3	GH3	GH3	GH	GH3
Prodigal_543|LOCUS_04540	2.4.1.64:4	GH65(344-718)	GH65_e2	3	maxbin_P.068.fasta	SG8-13 (a)	38	D	GH65	GH65	GH65	GH65	GH
Prodigal_2105|LOCUS_14750	2.4.1.25:21	GH77(8-249)	GH77_e26	2	maxbin_P.068.fasta	SG8-13 (a)	38	D		GH77	GH77	GH77	GH
Prodigal_995|LOCUS_08200	1.10.3.2:1	AA1(59-469)	AA1_e1	2	P_metabat_P.77.fa	SG8-13 (b)	37	D		AA1	AA1	AA1	AA	AA1
Prodigal_1134|LOCUS_09200	-	AA4(3-237)	AA4_e1	2	P_metabat_P.77.fa	SG8-13 (b)	37	D		AA4	AA4	AA4	AA	AA4
Prodigal_82|LOCUS_00740	-	AA4(4-218)	AA4_e1	2	P_metabat_P.77.fa	SG8-13 (b)	37	D		AA4	AA4	AA4	AA	AA4
Prodigal_1549|LOCUS_12120	-	AA6(3-195)	AA6_e2	2	P_metabat_P.77.fa	SG8-13 (b)	37	D		AA6	AA6	AA6	AA	AA6
Prodigal_1520|LOCUS_11900	-	CE14(8-118)	CE14_e3	2	P_metabat_P.77.fa	SG8-13 (b)	37	D		CE14	CE14	CE14	CE	CE14
Prodigal_1636|LOCUS_12750	-	GH103(44-329)	GH103_e29	2	P_metabat_P.77.fa	SG8-13 (b)	37	D		GH103	GH103	GH103	GH
Prodigal_1839|LOCUS_14160	-	GH13_3(237-457)	GH13_e41	3	P_metabat_P.77.fa	SG8-13 (b)	37	D	GH13	GH13	GH13	GH13	GH
Prodigal_125|LOCUS_01120	-	GH171(41-407)	GH171_e17	3	P_metabat_P.77.fa	SG8-13 (b)	37	D	GH171	GH171	GH171	GH171	GH
Prodigal_1076|LOCUS_08780	-	GH23(301-452)	GH23_e170	3	P_metabat_P.77.fa	SG8-13 (b)	37	D	GH23	GH23	GH23	GH23	GH
Prodigal_1512|LOCUS_11860	-	GH23(335-475)	GH23_e830	3	P_metabat_P.77.fa	SG8-13 (b)	37	D	GH23	GH23	GH23	GH23	GH
Prodigal_2460|LOCUS_18270	-	GH23(316-466)	GH23_e824	3	P_metabat_P.77.fa	SG8-13 (b)	37	D	GH23	GH23	GH23	GH23	GH
Prodigal_300|LOCUS_02630	3.2.1.17:12|4.2.2.n1:6	GH23(122-248)	GH23_e335	2	P_metabat_P.77.fa	SG8-13 (b)	37	D		GH23	GH23	GH23	GH
Prodigal_438|LOCUS_03760	-|-	GH23(89-220)	GH23_e710+CBM50_e717	3	P_metabat_P.77.fa	SG8-13 (b)	37	D	CBM50	GH23	GH23	GH23	GH
Prodigal_1063|LOCUS_08690	2.4.1.64:4	GH65(344-718)	GH65_e2	3	P_metabat_P.77.fa	SG8-13 (b)	37	D	GH65	GH65	GH65	GH65	GH
Prodigal_1625|LOCUS_13670	-	AA3_2(4-526)	AA3_e4	2	CW_metabat_CW.20.fa	SG8-38	42	E		AA3	AA3	AA3	AA	AA3
Prodigal_250|LOCUS_02310	-	AA3_2(3-538)	AA3_e57	3	CW_metabat_CW.20.fa	SG8-38	42	E	AA3	AA3	AA3	AA3	AA	AA3
Prodigal_1755|LOCUS_14670	2.4.1.18:166|2.4.1.18:50	GH13_8(227-518)	CBM48_e32+GH13_e20	3	CW_metabat_CW.20.fa	SG8-38	42	E	CBM48	GH13	CBM48	CBM48	CBM
Prodigal_610|LOCUS_05390	-	CE1(24-319)	CE1_e22	2	CW_metabat_CW.20.fa	SG8-38	42	E		CE1	CE1	CE1	CE	CE1
Prodigal_1882|LOCUS_15640	-	CE4(86-216)	CE4_e209	2	CW_metabat_CW.20.fa	SG8-38	42	E		CE4	CE4	CE4	CE	CE4
Prodigal_1394|LOCUS_11930	-	GH113(57-335)	GH113_e16	2	CW_metabat_CW.20.fa	SG8-38	42	E		GH113	GH113	GH113	GH
Prodigal_20|LOCUS_00200	-	GH133(310-659)	GH133_e2	3	CW_metabat_CW.20.fa	SG8-38	42	E	GH133	GH133	GH133	GH133	GH
Prodigal_493|LOCUS_04400	3.2.1.3:2	GH15(443-681)	GH15_e17	3	CW_metabat_CW.20.fa	SG8-38	42	E	GH15	GH15	GH15	GH15	GH
Prodigal_693|LOCUS_06120	3.2.1.3:1	GH15(249-608)	GH15_e59	3	CW_metabat_CW.20.fa	SG8-38	42	E	GH15	GH15	GH15	GH15	GH
Prodigal_1877|LOCUS_15600	-	GH171(25-387)	GH171_e23	3	CW_metabat_CW.20.fa	SG8-38	42	E	GH171	GH171	GH171	GH171	GH
Prodigal_772|LOCUS_06790	-	GH172(273-513)	GH172_e18	2	CW_metabat_CW.20.fa	SG8-38	42	E		GH172	GH172	GH172	GH
Prodigal_2938|LOCUS_22410	-	GH23(99-205)	GH23_e958	2	CW_metabat_CW.20.fa	SG8-38	42	E		GH23	GH23	GH23	GH
Prodigal_215|LOCUS_02000	-	GH3(75-290)	GH3_e99	3	CW_metabat_CW.20.fa	SG8-38	42	E	GH3	GH3	GH3	GH3	GH	GH3
Prodigal_1169|LOCUS_10140	-	GH31_13(258-701)	GH31_e52	2	CW_metabat_CW.20.fa	SG8-38	42	E		GH31	GH31	GH31	GH
Prodigal_1270|LOCUS_10970	3.2.1.123:1|3.2.1.46:1	GH5_29(54-392)	GH5_e70	3	CW_metabat_CW.20.fa	SG8-38	42	E	GH5	GH5	GH5	GH5	GH	GH5
Prodigal_18|LOCUS_00180	-	GH57(6-318)	GH57_e4	3	CW_metabat_CW.20.fa	SG8-38	42	E	GH57	GH57	GH57	GH57	GH
Prodigal_2666|LOCUS_20800	-	GH97(32-659)	GH97_e8	3	CW_metabat_CW.20.fa	SG8-38	42	E	GH97	GH97	GH97	GH97	GH
Prodigal_1298|LOCUS_12600	1.10.3.2:1	AA1(40-479)	AA1_e26	2	P_metabat_P.131.fa	SG8-41	58	E		AA1	AA1	AA1	AA	AA1
Prodigal_2748|LOCUS_25630	1.10.3.2:4|1.10.3.-:1	AA1(47-463)	AA1_e46	2	P_metabat_P.131.fa	SG8-41	58	E		AA1	AA1	AA1	AA	AA1
Prodigal_1124|LOCUS_10940	-	AA3_2(8-535)	AA3_e57	3	P_metabat_P.131.fa	SG8-41	58	E	AA3	AA3	AA3	AA3	AA	AA3
Prodigal_2014|LOCUS_19270	-	AA3_2(6-530)	AA3_e57	3	P_metabat_P.131.fa	SG8-41	58	E	AA3	AA3	AA3	AA3	AA	AA3
Prodigal_2724|LOCUS_25440	-	AA4(53-251)	AA4_e1	2	P_metabat_P.131.fa	SG8-41	58	E		AA4	AA4	AA4	AA	AA4
Prodigal_242|LOCUS_02370	-	AA6(4-193)	AA6_e2	2	P_metabat_P.131.fa	SG8-41	58	E		AA6	AA6	AA6	AA	AA6
Prodigal_1086|LOCUS_10580	3.1.1.72:1|3.2.1.8:1	CE1(39-283)	CE1_e24	2	P_metabat_P.131.fa	SG8-41	58	E		CE1	CE1	CE1	CE	CE1
Prodigal_734|LOCUS_07140	3.5.1.108:18	CE11(4-275)	CE11_e22	3	P_metabat_P.131.fa	SG8-41	58	E	CE11	CE11	CE11	CE11	CE	CE11
Prodigal_1016|LOCUS_09890	-	CE4(107-229)	CE4_e139	2	P_metabat_P.131.fa	SG8-41	58	E		CE4	CE4	CE4	CE	CE4
Prodigal_36|LOCUS_00360	-	CE4(35-178)	CE4_e349	2	P_metabat_P.131.fa	SG8-41	58	E		CE4	CE4	CE4	CE	CE4
Prodigal_1080|LOCUS_10520	-	GH103(28-319)	GH103_e3	3	P_metabat_P.131.fa	SG8-41	58	E	GH103	GH103	GH103	GH103	GH
Prodigal_1182|LOCUS_11500	-	GH13(309-675)	GH13_e70	3	P_metabat_P.131.fa	SG8-41	58	E	GH13	GH13	GH13	GH13	GH
Prodigal_1771|LOCUS_17080	-	GH13_3(238-459)	GH13_e41	3	P_metabat_P.131.fa	SG8-41	58	E	GH13	GH13	GH13	GH13	GH
Prodigal_2459|LOCUS_23210	3.2.1.3:1	GH15(218-580)	GH15_e59	3	P_metabat_P.131.fa	SG8-41	58	E	GH15	GH15	GH15	GH15	GH
Prodigal_2684|LOCUS_25110	-	GH15(224-583)	GH15_e14	3	P_metabat_P.131.fa	SG8-41	58	E	GH15	GH15	GH15	GH15	GH
Prodigal_1036|LOCUS_10090	-	GH23(482-608)	GH23_e952	3	P_metabat_P.131.fa	SG8-41	58	E	GH23	GH23	GH23	GH23	GH
Prodigal_1534|LOCUS_14860	-	GH23(120-221)	GH23_e898	2	P_metabat_P.131.fa	SG8-41	58	E		GH23	GH23	GH23	GH
Prodigal_1664|LOCUS_16060	-	GH23(399-538)	GH23_e638	2	P_metabat_P.131.fa	SG8-41	58	E		GH23	GH23	GH23	GH
Prodigal_2049|LOCUS_19570	-	GH23(341-482)	GH23_e764	3	P_metabat_P.131.fa	SG8-41	58	E	GH23	GH23	GH23	GH23	GH
Prodigal_240|LOCUS_02350	-	GH23(94-199)	GH23_e653	2	P_metabat_P.131.fa	SG8-41	58	E		GH23	GH23	GH23	GH
Prodigal_3007|LOCUS_27550	-	GH23(75-192)	GH23_e62	2	P_metabat_P.131.fa	SG8-41	58	E		GH23	GH23	GH23	GH
Prodigal_3028|LOCUS_27670	-	GH3(59-290)	GH3_e195	3	P_metabat_P.131.fa	SG8-41	58	E	GH3	GH3	GH3	GH3	GH	GH3
Prodigal_50|LOCUS_00500	3.2.1.52:1	GH3(54-285)	GH3_e78	3	P_metabat_P.131.fa	SG8-41	58	E	GH3	GH3	GH3	GH3	GH	GH3
Prodigal_1617|LOCUS_15620	2.4.1.282:1|2.4.1.216:1	GH65(323-732)	GH65_e15	3	P_metabat_P.131.fa	SG8-41	58	E	GH65	GH65	GH65	GH65	GH
Prodigal_520|LOCUS_05070	2.4.1.64:4	GH65(345-720)	GH65_e2	3	P_metabat_P.131.fa	SG8-41	58	E	GH65	GH65	GH65	GH65	GH
Prodigal_607|LOCUS_05930	3.2.1.68:75|2.4.1.25:4|3.2.1.-:1|3.2.1.68:15|3.2.1.-:1	GH13_11(166-521)	CBM48_e3+GH13_e48	3	L_metabat_L.108.fa	SM23-39	31	C	CBM48	GH13	CBM48	CBM48	CBM
Prodigal_1221|LOCUS_11830	-	CE11(14-284)	CE11_e37	2	L_metabat_L.108.fa	SM23-39	31	C		CE11	CE11	CE11	CE	CE11
Prodigal_975|LOCUS_09480	-	CE4(48-169)	CE4_e87	2	L_metabat_L.108.fa	SM23-39	31	C		CE4	CE4	CE4	CE	CE4
Prodigal_859|LOCUS_08360	3.5.1.25:7	CE9(7-382)	CE9_e51	3	L_metabat_L.108.fa	SM23-39	31	C	CE9	CE9	CE9	CE9	CE	CE9
Prodigal_154|LOCUS_01530	-	GH1(114-543)	GH1_e71	2	L_metabat_L.108.fa	SM23-39	31	C		GH1	GH1	GH1	GH	GH1
Prodigal_16|LOCUS_00160	-	GH13_33(98-419)	GH13_e179	3	L_metabat_L.108.fa	SM23-39	31	C	GH13	GH13	GH13	GH13	GH
Prodigal_540|LOCUS_05300	-	GH171(41-401)	GH171_e19	3	L_metabat_L.108.fa	SM23-39	31	C	GH171	GH171	GH171	GH171	GH
Prodigal_849|LOCUS_08260	3.2.1.52:8	GH3(91-313)	GH3_e28	3	L_metabat_L.108.fa	SM23-39	31	C	GH3	GH3	GH3	GH3	GH	GH3
Prodigal_1132|LOCUS_11000	-	GH77(33-527)	GH77_e31	3	L_metabat_L.108.fa	SM23-39	31	C	GH77	GH77	GH77	GH77	GH
Prodigal_1091|LOCUS_09610	3.2.1.54:37|3.2.1.133:20|3.2.1.135:9|3.2.1.54:7|3.2.1.133:3|3.2.1.135:2	CBM34(6-123)+GH13_20(172-468)	CBM34_e0+GH13_e225	3	L_25727.fna	Sporolactobacillaceae (a)	1	A	CBM34	CBM34	CBM34	CBM34	CBM	CBM34
Prodigal_1359|LOCUS_11640	-|-|-	GH18(169-405)	CBM50_e705+CBM50_e179+GH18_e284	3	L_25727.fna	Sporolactobacillaceae (a)	1	A	CBM50	GH18	CBM50	CBM50	CBM
Prodigal_1276|LOCUS_11020	-	CE14(8-126)	CE14_e39	2	L_25727.fna	Sporolactobacillaceae (a)	1	A		CE14	CE14	CE14	CE	CE14
Prodigal_812|LOCUS_07360	-	CE4(125-249)	CE4_e254	3	L_25727.fna	Sporolactobacillaceae (a)	1	A	CE4	CE4	CE4	CE4	CE	CE4
Prodigal_582|LOCUS_05380	3.5.1.25:7	CE9(4-375)	CE9_e51	3	L_25727.fna	Sporolactobacillaceae (a)	1	A	CE9	CE9	CE9	CE9	CE	CE9
Prodigal_434|LOCUS_04050	3.2.1.17:12|4.2.2.n1:6	GH23(99-206)	GH23_e335	2	L_25727.fna	Sporolactobacillaceae (a)	1	A		GH23	GH23	GH23	GH
Prodigal_154|LOCUS_01490	-|-	GH25(12-186)	GH25_e181+CBM50_e560	2	L_25727.fna	Sporolactobacillaceae (a)	1	A		GH25	GH25	GH25	GH
Prodigal_777|LOCUS_07080	3.2.1.20:2|3.2.1.10:1	GH31_1(232-673)	GH31_e22	3	L_25727.fna	Sporolactobacillaceae (a)	1	A	GH31	GH31	GH31	GH31	GH
Prodigal_471|LOCUS_04400	-	GH73(276-407)	GH73_e9	2	L_25727.fna	Sporolactobacillaceae (a)	1	A		GH73	GH73	GH73	GH
Prodigal_640|LOCUS_4260	-	AA6(5-195)	AA6_e2	2	maxbin_L.259.fasta	Sporolactobacillaceae (b)	32	C		AA6	AA6	AA6	AA	AA6
Prodigal_1007|LOCUS_6150	-	CE4(37-141)	CE4_e44	2	maxbin_L.259.fasta	Sporolactobacillaceae (b)	32	C		CE4	CE4	CE4	CE	CE4
Prodigal_1688|LOCUS_8700	-	CE4(51-170)	CE4_e14	2	maxbin_L.259.fasta	Sporolactobacillaceae (b)	32	C		CE4	CE4	CE4	CE	CE4
Prodigal_94|LOCUS_0750	3.5.1.104:5	CE4(57-180)	CE4_e23	2	maxbin_L.259.fasta	Sporolactobacillaceae (b)	32	C		CE4	CE4	CE4	CE	CE4
Prodigal_747|LOCUS_4880	3.2.1.17:12|4.2.2.n1:6	GH23(171-277)	GH23_e335	2	maxbin_L.259.fasta	Sporolactobacillaceae (b)	32	C		GH23	GH23	GH23	GH
Prodigal_1719|LOCUS_15540	1.14.99.53:2|-	AA10(31-169)	AA10_e49+CBM5_e64	2	L_metabat_L.121.fa	Streptomycetaceae	27	C		AA10	AA10	AA10	AA	AA10
Prodigal_405|LOCUS_03840	-	AA3(4-512)	AA3_e4	3	L_metabat_L.121.fa	Streptomycetaceae	27	C	AA3	AA3	AA3	AA3	AA	AA3
Prodigal_135|LOCUS_01340	1.1.3.-:1	AA7(22-258)	AA7_e0	2	L_metabat_L.121.fa	Streptomycetaceae	27	C		AA7	AA7	AA7	AA	AA7
Prodigal_1927|LOCUS_17390	1.1.3.-:1	AA7(8-183)	AA7_e0	2	L_metabat_L.121.fa	Streptomycetaceae	27	C		AA7	AA7	AA7	AA	AA7
Prodigal_487|LOCUS_04600	1.1.3.-:1	AA7(28-452)	AA7_e0	2	L_metabat_L.121.fa	Streptomycetaceae	27	C		AA7	AA7	AA7	AA	AA7
Prodigal_1722|LOCUS_15570	-|3.2.1.14:12|3.2.1.-:1	CBM16(41-150)+GH18(213-489)	CBM16_e29+GH18_e14	3	L_metabat_L.121.fa	Streptomycetaceae	27	C	CBM16	CBM16	CBM16	CBM16	CBM	CBM16
Prodigal_2842|LOCUS_24570	3.2.1.14:8|3.2.1.14:22|1.14.99.53:1	CBM2(43-139)+GH18(243-604)	CBM2_e16+GH18_e285	3	L_metabat_L.121.fa	Streptomycetaceae	27	C	CBM2	CBM2	CBM2	CBM2	CBM	CBM2
Prodigal_1131|LOCUS_10440	3.2.1.4:11|3.2.1.-:3|3.2.1.91:3|3.2.1.8:1|3.2.1.4:19|3.2.1.91:5|3.2.1.73:3|3.2.1.-:2|3.2.1.4:6	CBM4(43-163)+GH9(284-755)+CBM2(770-868)	CBM4_e0+GH9_e1+CBM2_e76	3	L_metabat_L.121.fa	Streptomycetaceae	27	C	CBM2	CBM4	CBM4	CBM4	CBM	CBM4
Prodigal_1975|LOCUS_17740	3.2.1.68:75|2.4.1.25:4|3.2.1.-:1|3.2.1.68:15|3.2.1.-:1	CBM48(52-145)+GH13_11(235-587)	CBM48_e3+GH13_e48	3	L_metabat_L.121.fa	Streptomycetaceae	27	C	CBM48	CBM48	CBM48	CBM48	CBM
Prodigal_2152|LOCUS_19250	2.4.1.18:57	CBM48(270-357)	CBM48_e2	3	L_metabat_L.121.fa	Streptomycetaceae	27	C	CBM48	CBM48	CBM48	CBM48	CBM
Prodigal_2339|LOCUS_20720	3.2.1.141:34|3.2.1.1:4|3.2.1.141:4	GH13_10(108-426)	CBM48_e0+GH13_e92	3	L_metabat_L.121.fa	Streptomycetaceae	27	C	CBM48	GH13	CBM48	CBM48	CBM
Prodigal_1730|LOCUS_15640	-|3.2.1.14:16	GH19(100-302)	CBM5_e109+GH19_e143	3	L_metabat_L.121.fa	Streptomycetaceae	27	C	CBM5	GH19	CBM5	CBM5	CBM	CBM5
Prodigal_1231|LOCUS_11340	-	-	CBM50_e91	2	L_metabat_L.121.fa	Streptomycetaceae	27	C	CBM50		CBM50	CBM50	CBM
Prodigal_3657|LOCUS_30360	-	CE14(17-122)	CE14_e39	2	L_metabat_L.121.fa	Streptomycetaceae	27	C		CE14	CE14	CE14	CE	CE14
Prodigal_2684|LOCUS_23330	-	CE4(73-208)	CE4_e233	2	L_metabat_L.121.fa	Streptomycetaceae	27	C		CE4	CE4	CE4	CE	CE4
Prodigal_3551|LOCUS_29690	-	CE4(44-165)	CE4_e326	2	L_metabat_L.121.fa	Streptomycetaceae	27	C		CE4	CE4	CE4	CE	CE4
Prodigal_3660|LOCUS_30390	3.5.1.25:3	CE9(11-375)	CE9_e105	3	L_metabat_L.121.fa	Streptomycetaceae	27	C	CE9	CE9	CE9	CE9	CE	CE9
Prodigal_754|LOCUS_07050	3.2.1.21:71|3.2.1.-:11|3.2.1.38:3|3.2.1.23:2|3.2.1.74:1	GH1(7-470)	GH1_e113	3	L_metabat_L.121.fa	Streptomycetaceae	27	C	GH1	GH1	GH1	GH1	GH	GH1
Prodigal_1497|LOCUS_13640	-	GH13_3(225-445)	GH13_e41	3	L_metabat_L.121.fa	Streptomycetaceae	27	C	GH13	GH13	GH13	GH13	GH
Prodigal_2153|LOCUS_19260	2.4.1.18:14	GH13_9(3-243)	GH13_e200	3	L_metabat_L.121.fa	Streptomycetaceae	27	C	CBM48	GH13	GH13	GH13	GH
Prodigal_232|LOCUS_02230	3.2.1.20:2	GH13_30(44-398)	GH13_e234	3	L_metabat_L.121.fa	Streptomycetaceae	27	C	GH13	GH13	GH13	GH13	GH
Prodigal_2764|LOCUS_23950	3.2.1.41:2	GH13_13(5-366)	GH13_e108	3	L_metabat_L.121.fa	Streptomycetaceae	27	C	CBM41	GH13	GH13	GH13	GH
Prodigal_520|LOCUS_04920	5.4.99.15:5	GH13_26(34-304)	GH13_e105	3	L_metabat_L.121.fa	Streptomycetaceae	27	C	GH13	GH13	GH13	GH13	GH
Prodigal_834|LOCUS_07780	3.2.1.20:2	GH13_30(57-398)	GH13_e234	3	L_metabat_L.121.fa	Streptomycetaceae	27	C	GH13	GH13	GH13	GH13	GH
Prodigal_1189|LOCUS_10970	3.2.1.205:1	GH15(27-375)	GH15_e47	3	L_metabat_L.121.fa	Streptomycetaceae	27	C	GH15	GH15	GH15	GH15	GH
Prodigal_1663|LOCUS_15090	3.2.1.3:1	GH15(222-589)	GH15_e59	3	L_metabat_L.121.fa	Streptomycetaceae	27	C	GH15	GH15	GH15	GH15	GH
Prodigal_2701|LOCUS_23470	3.2.1.28:6	GH15(233-601)	GH15_e22	3	L_metabat_L.121.fa	Streptomycetaceae	27	C	GH15	GH15	GH15	GH15	GH
Prodigal_1793|LOCUS_16210	-	GH16_3(704-959)	GH16_e204	3	L_metabat_L.121.fa	Streptomycetaceae	27	C	GH16	GH16	GH16	GH16	GH	GH16
Prodigal_695|LOCUS_06530	3.2.1.14:18|3.2.1.-:1|-	GH18(71-535)	GH18_e224+CBM5_e64	3	L_metabat_L.121.fa	Streptomycetaceae	27	C	CBM5	GH18	GH18	GH18	GH
Prodigal_141|LOCUS_01390	-	GH20(194-524)	GH20_e28	3	L_metabat_L.121.fa	Streptomycetaceae	27	C	GH20	GH20	GH20	GH20	GH
Prodigal_2235|LOCUS_19910	3.2.1.52:5	GH20(138-489)	GH20_e51	3	L_metabat_L.121.fa	Streptomycetaceae	27	C	GH20	GH20	GH20	GH20	GH
Prodigal_25|LOCUS_00250	-	GH23(67-190)	GH23_e908	3	L_metabat_L.121.fa	Streptomycetaceae	27	C	GH23	GH23	GH23	GH23	GH
Prodigal_3182|LOCUS_27110	-	GH23(68-193)	GH23_e108	3	L_metabat_L.121.fa	Streptomycetaceae	27	C	GH23	GH23	GH23	GH23	GH
Prodigal_2014|LOCUS_18090	3.2.1.120:1|3.2.1.74:1|3.2.1.120:1|3.2.1.74:1	GH3(41-270)	GH3_e179+CBM6_e50	3	L_metabat_L.121.fa	Streptomycetaceae	27	C	CBM6	GH3	GH3	GH3	GH	GH3
Prodigal_3046|LOCUS_26060	3.2.1.21:3|3.2.1.74:3|3.2.1.-:3|3.2.1.6:2|3.2.1.155:1	GH3(114-348)	GH3_e227	3	L_metabat_L.121.fa	Streptomycetaceae	27	C	GH3	GH3	GH3	GH3	GH	GH3
Prodigal_1190|LOCUS_10980	3.2.1.204:2	GH31_7(268-730)	GH31_e4	3	L_metabat_L.121.fa	Streptomycetaceae	27	C	GH31	GH31	GH31	GH31	GH
Prodigal_2242|LOCUS_19970	3.2.1.177:12	GH31_3(242-670)	GH31_e31	3	L_metabat_L.121.fa	Streptomycetaceae	27	C	GH31	GH31	GH31	GH31	GH
Prodigal_3882|LOCUS_31820	-	GH4(5-179)	GH4_e25	3	L_metabat_L.121.fa	Streptomycetaceae	27	C	GH4	GH4	GH4	GH4	GH
Prodigal_788|LOCUS_07380	-	GH4(13-196)	GH4_e15	3	L_metabat_L.121.fa	Streptomycetaceae	27	C	GH4	GH4	GH4	GH4	GH
Prodigal_1079|LOCUS_09970	-	GH42(17-381)	GH42_e32	3	L_metabat_L.121.fa	Streptomycetaceae	27	C	GH42	GH42	GH42	GH42	GH	GH42
Prodigal_1078|LOCUS_09960	3.2.1.55:1|-	GH43_12(11-284)+CBM91(308-500)	GH43_e73+CBM91_e27	3	L_metabat_L.121.fa	Streptomycetaceae	27	C	GH43	GH43	GH43	GH43	GH	GH43
Prodigal_1130|LOCUS_10430	3.2.1.4:25|3.2.1.78:5|3.2.1.73:1|3.2.1.74:1|3.2.1.151:6	GH5_1(75-412)+CBM2(574-672)	GH5_e276+CBM2_e108	3	L_metabat_L.121.fa	Streptomycetaceae	27	C	CBM2	GH5	GH5	GH5	GH	GH5
Prodigal_3470|LOCUS_29150	3.2.1.78:15|-	GH5_8(50-297)+CBM2(443-543)	GH5_e22+CBM2_e31	3	L_metabat_L.121.fa	Streptomycetaceae	27	C	CBM2	GH5	GH5	GH5	GH	GH5
Prodigal_3105|LOCUS_26510	3.2.1.4:4	GH6(75-333)	GH6_e14	3	L_metabat_L.121.fa	Streptomycetaceae	27	C	GH6	GH6	GH6	GH6	GH	GH6
Prodigal_3984|LOCUS_32490	3.2.1.4:4	GH6(71-327)	GH6_e14	3	L_metabat_L.121.fa	Streptomycetaceae	27	C	GH6	GH6	GH6	GH6	GH	GH6
Prodigal_734|LOCUS_06870	3.2.1.170:2	GH63(46-470)	GH63_e10	3	L_metabat_L.121.fa	Streptomycetaceae	27	C	GH63	GH63	GH63	GH63	GH
Prodigal_3385|LOCUS_28580	2.4.1.282:1|2.4.1.216:1	GH65(338-747)	GH65_e15	3	L_metabat_L.121.fa	Streptomycetaceae	27	C	GH65	GH65	GH65	GH65	GH
Prodigal_610|LOCUS_05760	-	GH88(198-334)	GH88_e21	2	L_metabat_L.121.fa	Streptomycetaceae	27	C		GH88	GH88	GH88	GH
Prodigal_1363|LOCUS_13100	-|-	AA2(82-190)+AA2(461-723)	AA2_e1+AA2_e1	3	C_metabat_C.37.fa	SZUA-229	69	F	AA0	AA2	AA2	AA2	AA	AA2
Prodigal_120|LOCUS_01160	-	AA6(4-194)	AA6_e2	2	C_metabat_C.37.fa	SZUA-229	69	F		AA6	AA6	AA6	AA	AA6
Prodigal_3075|LOCUS_28630	2.4.1.18:57|2.4.1.18:14	CBM48(121-206)+GH13_9(275-574)	CBM48_e2+GH13_e200	3	C_metabat_C.37.fa	SZUA-229	69	F	CBM48	CBM48	CBM48	CBM48	CBM
Prodigal_958|LOCUS_09250	2.4.1.18:57|2.4.1.18:14	CBM48(119-204)+GH13_9(271-571)	CBM48_e2+GH13_e200	3	C_metabat_C.37.fa	SZUA-229	69	F	CBM48	CBM48	CBM48	CBM48	CBM
Prodigal_1798|LOCUS_17140	3.2.1.14:1	-	CBM50_e623	2	C_metabat_C.37.fa	SZUA-229	69	F	CBM50		CBM50	CBM50	CBM
Prodigal_78|LOCUS_00750	3.5.1.108:18	CE11(1-250)	CE11_e22	3	C_metabat_C.37.fa	SZUA-229	69	F	CE11	CE11	CE11	CE11	CE	CE11
Prodigal_720|LOCUS_06970	-	CE4(73-207)	CE4_e95	2	C_metabat_C.37.fa	SZUA-229	69	F		CE4	CE4	CE4	CE	CE4
Prodigal_2116|LOCUS_20120	3.1.1.72:4	CE7(3-292)	CE7_e23	2	C_metabat_C.37.fa	SZUA-229	69	F		CE7	CE7	CE7	CE	CE7
Prodigal_3045|LOCUS_28380	-	GH103(31-317)	GH103_e29	2	C_metabat_C.37.fa	SZUA-229	69	F		GH103	GH103	GH103	GH
Prodigal_729|LOCUS_07060	-	GH103(15-308)	GH103_e38	3	C_metabat_C.37.fa	SZUA-229	69	F	GH103	GH103	GH103	GH103	GH
Prodigal_279|LOCUS_02710	2.4.1.329:1	GH13_18(247-472)	GH13_e104	3	C_metabat_C.37.fa	SZUA-229	69	F	GH13	GH13	GH13	GH13	GH
Prodigal_2612|LOCUS_24550	-	GH20(100-335)	GH20_e34	2	C_metabat_C.37.fa	SZUA-229	69	F		GH20	GH20	GH20	GH
Prodigal_1383|LOCUS_13280	-	GH23(274-422)	GH23_e316	3	C_metabat_C.37.fa	SZUA-229	69	F	GH23	GH23	GH23	GH23	GH
Prodigal_1648|LOCUS_15720	-	GH23(546-675)	GH23_e403	3	C_metabat_C.37.fa	SZUA-229	69	F	GH23	GH23	GH23	GH23	GH
Prodigal_1703|LOCUS_16220	-	GH23(85-189)	GH23_e279	2	C_metabat_C.37.fa	SZUA-229	69	F		GH23	GH23	GH23	GH
Prodigal_2732|LOCUS_25640	-	GH23(298-443)	GH23_e824	3	C_metabat_C.37.fa	SZUA-229	69	F	GH23	GH23	GH23	GH23	GH
Prodigal_336|LOCUS_03270	-|-|-|-	GH23(96-239)	GH23_e756+CBM50_e573+CBM50_e496+CBM50_e496	3	C_metabat_C.37.fa	SZUA-229	69	F	CBM50	GH23	GH23	GH23	GH
Prodigal_2431|LOCUS_22970	3.2.1.52:1	GH3(55-282)	GH3_e78	3	C_metabat_C.37.fa	SZUA-229	69	F	GH3	GH3	GH3	GH3	GH	GH3
Prodigal_960|LOCUS_09270	-	GH57(12-490)	GH57_e28	3	C_metabat_C.37.fa	SZUA-229	69	F	GH57	GH57	GH57	GH57	GH
Prodigal_1163|LOCUS_11180	-	GH73(146-282)	GH73_e260	2	C_metabat_C.37.fa	SZUA-229	69	F		GH73	GH73	GH73	GH
Prodigal_728|LOCUS_07050	-	GH73(131-255)	GH73_e151	2	C_metabat_C.37.fa	SZUA-229	69	F		GH73	GH73	GH73	GH
Prodigal_959|LOCUS_09260	2.4.1.25:21	GH77(83-451)	GH77_e26	3	C_metabat_C.37.fa	SZUA-229	69	F	GH77	GH77	GH77	GH77	GH
Prodigal_1876|LOCUS_18070	-	AA3_2(2-519)	AA3_e57	3	C_metabat_C.125.fa	SZUA-232	52	E	AA3	AA3	AA3	AA3	AA	AA3
Prodigal_110|LOCUS_01080	-	AA4(47-245)	AA4_e1	2	C_metabat_C.125.fa	SZUA-232	52	E		AA4	AA4	AA4	AA	AA4
Prodigal_2368|LOCUS_22570	-	AA4(2-536)	AA4_e1	2	C_metabat_C.125.fa	SZUA-232	52	E		AA4	AA4	AA4	AA	AA4
Prodigal_2589|LOCUS_24500	-	AA4(45-242)	AA4_e1	2	C_metabat_C.125.fa	SZUA-232	52	E		AA4	AA4	AA4	AA	AA4
Prodigal_1049|LOCUS_10260	3.2.1.68:75|2.4.1.25:4|3.2.1.-:1|3.2.1.68:15|3.2.1.-:1	CBM48(42-131)+GH13_11(209-562)	CBM48_e3+GH13_e48	3	C_metabat_C.125.fa	SZUA-232	52	E	CBM48	CBM48	CBM48	CBM48	CBM
Prodigal_3041|LOCUS_28410	2.4.1.18:57|2.4.1.18:14	CBM48(25-111)+GH13_9(180-480)	CBM48_e2+GH13_e200	3	C_metabat_C.125.fa	SZUA-232	52	E	CBM48	CBM48	CBM48	CBM48	CBM
Prodigal_2752|LOCUS_25960	-	CBM9(535-728)	-	2	C_metabat_C.125.fa	SZUA-232	52	E	CBM9	CBM9		CBM9	CBM	CBM9
Prodigal_2069|LOCUS_19860	-	CE14(23-138)	CE14_e46	2	C_metabat_C.125.fa	SZUA-232	52	E		CE14	CE14	CE14	CE	CE14
Prodigal_2697|LOCUS_25490	-	CE14(6-114)	CE14_e40	2	C_metabat_C.125.fa	SZUA-232	52	E		CE14	CE14	CE14	CE	CE14
Prodigal_3026|LOCUS_28300	3.5.1.89:6	CE14(34-166)	CE14_e2	2	C_metabat_C.125.fa	SZUA-232	52	E		CE14	CE14	CE14	CE	CE14
Prodigal_391|LOCUS_03860	-	CE14(14-126)	CE14_e52	2	C_metabat_C.125.fa	SZUA-232	52	E		CE14	CE14	CE14	CE	CE14
Prodigal_1338|LOCUS_12990	-	CE4(81-208)	CE4_e274	2	C_metabat_C.125.fa	SZUA-232	52	E		CE4	CE4	CE4	CE	CE4
Prodigal_926|LOCUS_09080	-	CE4(4-146)	CE4_e37	2	C_metabat_C.125.fa	SZUA-232	52	E		CE4	CE4	CE4	CE	CE4
Prodigal_961|LOCUS_09410	-	CE9(9-360)	CE9_e38	2	C_metabat_C.125.fa	SZUA-232	52	E		CE9	CE9	CE9	CE	CE9
Prodigal_3255|LOCUS_30260	3.2.1.21:51|3.2.1.38:2|3.2.1.-:1	GH1(5-443)	GH1_e107	3	C_metabat_C.125.fa	SZUA-232	52	E	GH1	GH1	GH1	GH1	GH	GH1
Prodigal_222|LOCUS_02190	3.2.1.20:1|3.2.1.10:1	GH13_23(29-373)	GH13_e182	3	C_metabat_C.125.fa	SZUA-232	52	E	GH13	GH13	GH13	GH13	GH
Prodigal_223|LOCUS_02200	5.4.99.16:7	GH13_16(38-391)	GH13_e0	3	C_metabat_C.125.fa	SZUA-232	52	E	GH13	GH13	GH13	GH13	GH
Prodigal_2426|LOCUS_23080	2.4.1.4:1	GH13_4(102-501)	GH13_e83	3	C_metabat_C.125.fa	SZUA-232	52	E	GH13	GH13	GH13	GH13	GH
Prodigal_2727|LOCUS_25750	3.2.1.41:1|3.2.1.135:1	GH13_20(51-368)	GH13_e157	3	C_metabat_C.125.fa	SZUA-232	52	E	GH13	GH13	GH13	GH13	GH
Prodigal_1382|LOCUS_13420	-	GH130_8(269-492)	GH130_e14	3	C_metabat_C.125.fa	SZUA-232	52	E	GH130	GH130	GH130	GH130	GH
Prodigal_676|LOCUS_06650	-	GH25(42-205)	GH25_e118	2	C_metabat_C.125.fa	SZUA-232	52	E		GH25	GH25	GH25	GH
Prodigal_3726|LOCUS_33930	-	GH5_19(7-103)+GH5_19(128-270)	GH5_e48	3	C_metabat_C.125.fa	SZUA-232	52	E	GH5	GH5	GH5	GH5	GH	GH5
Prodigal_1349|LOCUS_13100	-	GH57(72-534)	GH57_e18	3	C_metabat_C.125.fa	SZUA-232	52	E	GH57	GH57	GH57	GH57	GH
Prodigal_1607|LOCUS_15540	2.4.1.282:1|2.4.1.216:1	GH65(318-726)	GH65_e15	3	C_metabat_C.125.fa	SZUA-232	52	E	GH65	GH65	GH65	GH65	GH
Prodigal_2805|LOCUS_26420	2.4.1.25:21	GH77(10-487)	GH77_e26	3	C_metabat_C.125.fa	SZUA-232	52	E	GH77	GH77	GH77	GH77	GH
Prodigal_1663|LOCUS_16070	-	PL14(60-257)	PL14_e16	2	C_metabat_C.125.fa	SZUA-232	52	E		PL14	PL14	PL14	PL
Prodigal_1919|LOCUS_18470	-	PL14(59-259)	PL14_e16	2	C_metabat_C.125.fa	SZUA-232	52	E		PL14	PL14	PL14	PL
Prodigal_695|LOCUS_06840	-	PL14(84-252)	PL14_e16	2	C_metabat_C.125.fa	SZUA-232	52	E		PL14	PL14	PL14	PL
Prodigal_952|LOCUS_09320	-	PL14(98-296)	PL14_e16	2	C_metabat_C.125.fa	SZUA-232	52	E		PL14	PL14	PL14	PL
Prodigal_298|LOCUS_2320	-	CE4(107-228)	CE4_e226	2	maxbin_LW.310.fasta	SZUA-584	5	A		CE4	CE4	CE4	CE	CE4
Prodigal_160|LOCUS_1280	3.2.1.21:1|3.2.1.147:1	GH1(2-446)	GH1_e10	3	maxbin_LW.310.fasta	SZUA-584	5	A	GH1	GH1	GH1	GH1	GH	GH1
Prodigal_20|LOCUS_0170	3.2.1.21:22|3.2.1.-:4|3.2.1.37:1|3.2.1.55:1|3.2.1.23:1|3.2.1.45:1	GH3(31-251)	GH3_e197	3	maxbin_LW.310.fasta	SZUA-584	5	A	GH3	GH3	GH3	GH3	GH	GH3
Prodigal_430|LOCUS_3260	3.2.1.37:92|3.2.1.55:39|3.2.1.21:1|3.2.1.6:1|3.2.1.73:1	GH3(38-275)	GH3_e0	3	maxbin_LW.310.fasta	SZUA-584	5	A	GH3	GH3	GH3	GH3	GH	GH3
Prodigal_2973|LOCUS_28120	-	AA3_2(24-556)	AA3_e57	3	LW_metabat_LW.129.fa	UBA11606	68	F	AA3	AA3	AA3	AA3	AA	AA3
Prodigal_3133|LOCUS_29480	-	AA3_2(5-532)	AA3_e57	3	LW_metabat_LW.129.fa	UBA11606	68	F	AA3	AA3	AA3	AA3	AA	AA3
Prodigal_2952|LOCUS_27950	1.1.3.38:1	AA4(17-245)	AA4_e0	2	LW_metabat_LW.129.fa	UBA11606	68	F		AA4	AA4	AA4	AA	AA4
Prodigal_1426|LOCUS_13830	1.1.3.-:1	AA7(27-454)	AA7_e0	2	LW_metabat_LW.129.fa	UBA11606	68	F		AA7	AA7	AA7	AA	AA7
Prodigal_2043|LOCUS_19680	1.1.3.-:1	AA7(31-461)	AA7_e0	2	LW_metabat_LW.129.fa	UBA11606	68	F		AA7	AA7	AA7	AA	AA7
Prodigal_2064|LOCUS_19890	1.1.3.-:1	AA7(24-190)	AA7_e0	2	LW_metabat_LW.129.fa	UBA11606	68	F		AA7	AA7	AA7	AA	AA7
Prodigal_2280|LOCUS_21930	3.2.1.68:75|2.4.1.25:4|3.2.1.-:1|3.2.1.68:15|3.2.1.-:1	GH13_11(176-529)	CBM48_e3+GH13_e48	3	LW_metabat_LW.129.fa	UBA11606	68	F	CBM48	GH13	CBM48	CBM48	CBM
Prodigal_3555|LOCUS_32720	-|2.4.1.18:14	CBM48(33-114)+GH13_9(176-474)	CBM48_e87+GH13_e200	3	LW_metabat_LW.129.fa	UBA11606	68	F	CBM48	CBM48	CBM48	CBM48	CBM
Prodigal_1189|LOCUS_11540	-	CE14(6-135)	CE14_e6	2	LW_metabat_LW.129.fa	UBA11606	68	F		CE14	CE14	CE14	CE	CE14
Prodigal_185|LOCUS_01820	-	CE14(36-152)	CE14_e45	2	LW_metabat_LW.129.fa	UBA11606	68	F		CE14	CE14	CE14	CE	CE14
Prodigal_2066|LOCUS_19910	-	CE14(9-114)	CE14_e39	2	LW_metabat_LW.129.fa	UBA11606	68	F		CE14	CE14	CE14	CE	CE14
Prodigal_2188|LOCUS_21060	3.5.1.115:3	CE14(8-142)	CE14_e1	2	LW_metabat_LW.129.fa	UBA11606	68	F		CE14	CE14	CE14	CE	CE14
Prodigal_2269|LOCUS_21830	-	CE14(18-143)	CE14_e6	2	LW_metabat_LW.129.fa	UBA11606	68	F		CE14	CE14	CE14	CE	CE14
Prodigal_684|LOCUS_06660	-	CE14(42-159)	CE14_e28	2	LW_metabat_LW.129.fa	UBA11606	68	F		CE14	CE14	CE14	CE	CE14
Prodigal_91|LOCUS_00890	-	CE14(20-136)	CE14_e39	2	LW_metabat_LW.129.fa	UBA11606	68	F		CE14	CE14	CE14	CE	CE14
Prodigal_2882|LOCUS_27350	-	CE4(114-238)	CE4_e219	2	LW_metabat_LW.129.fa	UBA11606	68	F		CE4	CE4	CE4	CE	CE4
Prodigal_611|LOCUS_05960	-	CE4(73-187)	CE4_e274	2	LW_metabat_LW.129.fa	UBA11606	68	F		CE4	CE4	CE4	CE	CE4
Prodigal_704|LOCUS_06860	-	CE9(2-353)	CE9_e48	2	LW_metabat_LW.129.fa	UBA11606	68	F		CE9	CE9	CE9	CE	CE9
Prodigal_3534|LOCUS_32590	3.2.1.109:1	GH114(54-243)	GH114_e0	2	LW_metabat_LW.129.fa	UBA11606	68	F		GH114	GH114	GH114	GH
Prodigal_2478|LOCUS_23730	3.2.1.20:2	GH13_23(39-379)	GH13_e234	3	LW_metabat_LW.129.fa	UBA11606	68	F	GH13	GH13	GH13	GH13	GH
Prodigal_2649|LOCUS_25300	2.4.1.352:2	GH13_18(53-393)	GH13_e137	3	LW_metabat_LW.129.fa	UBA11606	68	F	GH13	GH13	GH13	GH13	GH
Prodigal_3514|LOCUS_32460	-	GH20(50-275)	GH20_e36	3	LW_metabat_LW.129.fa	UBA11606	68	F	GH20	GH20	GH20	GH20	GH
Prodigal_1056|LOCUS_10280	-	GH23(179-270)	GH23_e124	2	LW_metabat_LW.129.fa	UBA11606	68	F		GH23	GH23	GH23	GH
Prodigal_956|LOCUS_09300	-	GH23(276-418)	GH23_e328	2	LW_metabat_LW.129.fa	UBA11606	68	F		GH23	GH23	GH23	GH
Prodigal_343|LOCUS_03370	3.2.1.21:2|3.2.1.126:1|3.2.1.37:1	GH3(32-245)	GH3_e175	3	LW_metabat_LW.129.fa	UBA11606	68	F	GH3	GH3	GH3	GH3	GH	GH3
Prodigal_3092|LOCUS_29150	3.2.1.22:9	GH4(1-176)	GH4_e17	3	LW_metabat_LW.129.fa	UBA11606	68	F	GH4	GH4	GH4	GH4	GH
Prodigal_1305|LOCUS_12660	3.2.1.146:2	GH43_30(101-365)	GH43_e265	2	LW_metabat_LW.129.fa	UBA11606	68	F		GH43	GH43	GH43	GH	GH43
Prodigal_1306|LOCUS_12670	-	GH43_30(89-346)	GH43_e227	2	LW_metabat_LW.129.fa	UBA11606	68	F		GH43	GH43	GH43	GH	GH43
Prodigal_3409|LOCUS_31610	3.2.1.146:2	GH43_30(28-300)	GH43_e265	3	LW_metabat_LW.129.fa	UBA11606	68	F	GH43	GH43	GH43	GH43	GH	GH43
Prodigal_938|LOCUS_09130	3.2.1.146:2	GH43_30(103-355)	GH43_e265	2	LW_metabat_LW.129.fa	UBA11606	68	F		GH43	GH43	GH43	GH	GH43
Prodigal_1527|LOCUS_11710	-	AA6(4-192)	AA6_e2	2	CW_metabat_CW.86.fa	UBA4486	25	B		AA6	AA6	AA6	AA	AA6
Prodigal_251|LOCUS_02250	3.5.1.108:18	CE11(4-275)	CE11_e22	3	CW_metabat_CW.86.fa	UBA4486	25	B	CE11	CE11	CE11	CE11	CE	CE11
Prodigal_1266|LOCUS_10060	-	GH103(4-284)	GH103_e29	3	CW_metabat_CW.86.fa	UBA4486	25	B	GH103	GH103	GH103	GH103	GH
Prodigal_27|LOCUS_00270	-	CE11(164-431)	CE11_e0	2	C_27077.fna	UBA5704 (a)	55	E		CE11	CE11	CE11	CE	CE11
Prodigal_2180|LOCUS_20610	-	CE14(9-114)	CE14_e33	2	C_27077.fna	UBA5704 (a)	55	E		CE14	CE14	CE14	CE	CE14
Prodigal_3229|LOCUS_29390	-|-	GH113(32-160)+GH113(247-414)	GH113_e18+GH113_e18	3	C_27077.fna	UBA5704 (a)	55	E	GH113	GH113	GH113	GH113	GH
Prodigal_706|LOCUS_06830	-	GH113(59-344)	GH113_e24	2	C_27077.fna	UBA5704 (a)	55	E		GH113	GH113	GH113	GH
Prodigal_1381|LOCUS_13300	-	GH13_41(73-367)	GH13_e10	3	C_27077.fna	UBA5704 (a)	55	E	GH13	GH13	GH13	GH13	GH
Prodigal_1763|LOCUS_16830	2.4.1.18:14	GH13_9(167-467)	GH13_e200	3	C_27077.fna	UBA5704 (a)	55	E	CBM48	GH13	GH13	GH13	GH
Prodigal_2614|LOCUS_24450	-	GH13(329-688)	GH13_e70	3	C_27077.fna	UBA5704 (a)	55	E	GH13	GH13	GH13	GH13	GH
Prodigal_1593|LOCUS_15260	-	GH171(22-389)	GH171_e23	2	C_27077.fna	UBA5704 (a)	55	E		GH171	GH171	GH171	GH
Prodigal_1681|LOCUS_16070	3.2.1.-:1|3.2.1.23:1	GH2(42-797)	GH2_e106	3	C_27077.fna	UBA5704 (a)	55	E	GH2	GH2	GH2	GH2	GH	GH2
Prodigal_29|LOCUS_00290	-	GH20(134-393)	GH20_e75	3	C_27077.fna	UBA5704 (a)	55	E	GH20	GH20	GH20	GH20	GH
Prodigal_1770|LOCUS_16900	-|-	GH23(234-356)	GH23_e543+CBM50_e851	3	C_27077.fna	UBA5704 (a)	55	E	CBM50	GH23	GH23	GH23	GH
Prodigal_1898|LOCUS_18050	3.2.1.17:12|4.2.2.n1:6	GH23(65-179)	GH23_e335	2	C_27077.fna	UBA5704 (a)	55	E		GH23	GH23	GH23	GH
Prodigal_2808|LOCUS_26120	-	GH23(119-229)	GH23_e958	2	C_27077.fna	UBA5704 (a)	55	E		GH23	GH23	GH23	GH
Prodigal_299|LOCUS_02910	-	GH23(616-740)	GH23_e953	2	C_27077.fna	UBA5704 (a)	55	E		GH23	GH23	GH23	GH
Prodigal_3199|LOCUS_29170	3.2.1.17:12|4.2.2.n1:6	GH23(110-223)	GH23_e335	2	C_27077.fna	UBA5704 (a)	55	E		GH23	GH23	GH23	GH
Prodigal_408|LOCUS_03980	-	GH23(600-732)	GH23_e594	2	C_27077.fna	UBA5704 (a)	55	E		GH23	GH23	GH23	GH
Prodigal_2429|LOCUS_22840	3.2.1.52:4|-	GH3(119-344)+GH171(1002-1360)	GH3_e199+GH171_e8	3	C_27077.fna	UBA5704 (a)	55	E	GH3	GH3	GH3	GH3	GH	GH3
Prodigal_1011|LOCUS_09960	1.1.3.-:1	AA7(44-469)	AA7_e0	2	C_metabat_C.60.fa	UBA5704 (b)	13	B		AA7	AA7	AA7	AA	AA7
Prodigal_2327|LOCUS_22530	3.2.1.68:75|2.4.1.25:4|3.2.1.-:1|3.2.1.68:15|3.2.1.-:1	GH13_11(213-564)	CBM48_e3+GH13_e48	3	C_metabat_C.60.fa	UBA5704 (b)	13	B	CBM48	GH13	CBM48	CBM48	CBM
Prodigal_2261|LOCUS_21900	3.2.1.40:1	CBM67(34-152)	CBM67_e28	2	C_metabat_C.60.fa	UBA5704 (b)	13	B		CBM67	CBM67	CBM67	CBM
Prodigal_1227|LOCUS_12030	-	CE1(583-791)	CE1_e22	2	C_metabat_C.60.fa	UBA5704 (b)	13	B		CE1	CE1	CE1	CE	CE1
Prodigal_239|LOCUS_02370	-	CE1(568-781)	CE1_e22	2	C_metabat_C.60.fa	UBA5704 (b)	13	B		CE1	CE1	CE1	CE	CE1
Prodigal_2886|LOCUS_27640	-	CE11(163-429)	CE11_e0	2	C_metabat_C.60.fa	UBA5704 (b)	13	B		CE11	CE11	CE11	CE	CE11
Prodigal_917|LOCUS_09050	-	CE14(6-111)	CE14_e27	2	C_metabat_C.60.fa	UBA5704 (b)	13	B		CE14	CE14	CE14	CE	CE14
Prodigal_1013|LOCUS_09980	2.4.1.-:1|3.5.1.-:1	CE4(566-776)	CE4_e298	2	C_metabat_C.60.fa	UBA5704 (b)	13	B		CE4	CE4	CE4	CE	CE4
Prodigal_1653|LOCUS_16120	-	GH113(52-349)	GH113_e24	2	C_metabat_C.60.fa	UBA5704 (b)	13	B		GH113	GH113	GH113	GH
Prodigal_3336|LOCUS_31430	2.4.1.352:2	GH13_18(113-457)	GH13_e137	3	C_metabat_C.60.fa	UBA5704 (b)	13	B	GH13	GH13	GH13	GH13	GH
Prodigal_2885|LOCUS_27630	-	GH20(141-449)	GH20_e75	3	C_metabat_C.60.fa	UBA5704 (b)	13	B	GH20	GH20	GH20	GH20	GH
Prodigal_1351|LOCUS_13250	3.2.1.17:12|4.2.2.n1:6	GH23(43-159)	GH23_e335	2	C_metabat_C.60.fa	UBA5704 (b)	13	B		GH23	GH23	GH23	GH
Prodigal_1922|LOCUS_18670	-|-|3.2.1.14:1|-	GH23(248-380)	GH23_e851+CBM50_e859+CBM50_e623+CBM50_e1043	3	C_metabat_C.60.fa	UBA5704 (b)	13	B	CBM50	GH23	GH23	GH23	GH
Prodigal_2008|LOCUS_19500	-	GH23(602-729)	GH23_e953	2	C_metabat_C.60.fa	UBA5704 (b)	13	B		GH23	GH23	GH23	GH
Prodigal_275|LOCUS_02730	-	GH23(603-734)	GH23_e594	2	C_metabat_C.60.fa	UBA5704 (b)	13	B		GH23	GH23	GH23	GH
Prodigal_3233|LOCUS_30550	-	GH23(279-417)	GH23_e638	3	C_metabat_C.60.fa	UBA5704 (b)	13	B	GH23	GH23	GH23	GH23	GH
Prodigal_387|LOCUS_03840	3.2.1.17:12|4.2.2.n1:6	GH23(121-227)	GH23_e335	2	C_metabat_C.60.fa	UBA5704 (b)	13	B		GH23	GH23	GH23	GH
Prodigal_86|LOCUS_00860	-	GH23(124-238)	GH23_e958	2	C_metabat_C.60.fa	UBA5704 (b)	13	B		GH23	GH23	GH23	GH
Prodigal_1386|LOCUS_13590	-	GH38(14-267)	GH38_e24	3	C_metabat_C.60.fa	UBA5704 (b)	13	B	GH38	GH38	GH38	GH38	GH
Prodigal_1901|LOCUS_18470	-	PL14(280-482)	PL14_e16	3	C_metabat_C.60.fa	UBA5704 (b)	13	B	PL14	PL14	PL14	PL14	PL
Prodigal_1509|LOCUS_14780	-	PL9(27-320)	PL9_e33	2	C_metabat_C.60.fa	UBA5704 (b)	13	B		PL9	PL9	PL9	PL
Prodigal_1702|LOCUS_15520	4.2.2.-:1	CBM32(478-591)	CBM32_e204	2	C_metabat_C.83.fa	UBA5704 (c)	18	B		CBM32	CBM32	CBM32	CBM	CBM32
Prodigal_1849|LOCUS_16800	3.2.1.68:75|2.4.1.25:4|3.2.1.-:1|3.2.1.68:15|3.2.1.-:1	GH13_11(160-512)	CBM48_e3+GH13_e48	3	C_metabat_C.83.fa	UBA5704 (c)	18	B	CBM48	GH13	CBM48	CBM48	CBM
Prodigal_1116|LOCUS_10400	3.1.1.72:1|3.2.1.8:1	CE1(74-238)	CE1_e24	2	C_metabat_C.83.fa	UBA5704 (c)	18	B		CE1	CE1	CE1	CE	CE1
Prodigal_216|LOCUS_02040	-	CE14(6-111)	CE14_e27	2	C_metabat_C.83.fa	UBA5704 (c)	18	B		CE14	CE14	CE14	CE	CE14
Prodigal_518|LOCUS_04870	-	CE4(78-291)	CE4_e247	2	C_metabat_C.83.fa	UBA5704 (c)	18	B		CE4	CE4	CE4	CE	CE4
Prodigal_694|LOCUS_06500	-	CE4(44-154)	CE4_e165	2	C_metabat_C.83.fa	UBA5704 (c)	18	B		CE4	CE4	CE4	CE	CE4
Prodigal_990|LOCUS_09250	3.2.1.49:6|3.2.1.52:2	GH109(50-443)	GH109_e0	3	C_metabat_C.83.fa	UBA5704 (c)	18	B	GH109	GH109	GH109	GH109	GH
Prodigal_997|LOCUS_09320	-|-	GH113(80-208)	GH113_e18+GH113_e18	3	C_metabat_C.83.fa	UBA5704 (c)	18	B	GH113	GH113	GH113	GH113	GH
Prodigal_3053|LOCUS_25870	-	GH114(2-152)	GH114_e10	2	C_metabat_C.83.fa	UBA5704 (c)	18	B		GH114	GH114	GH114	GH
Prodigal_2673|LOCUS_23220	3.2.1.185:1	GH127(37-578)	GH127_e4	3	C_metabat_C.83.fa	UBA5704 (c)	18	B	GH127	GH127	GH127	GH127	GH
Prodigal_2018|LOCUS_18170	-	GH171(22-389)	GH171_e23	2	C_metabat_C.83.fa	UBA5704 (c)	18	B		GH171	GH171	GH171	GH
Prodigal_2816|LOCUS_24230	-	GH20(132-383)	GH20_e75	3	C_metabat_C.83.fa	UBA5704 (c)	18	B	GH20	GH20	GH20	GH20	GH
Prodigal_1433|LOCUS_13160	-	GH23(116-224)	GH23_e526	2	C_metabat_C.83.fa	UBA5704 (c)	18	B		GH23	GH23	GH23	GH
Prodigal_159|LOCUS_01520	-	GH23(608-735)	GH23_e953	2	C_metabat_C.83.fa	UBA5704 (c)	18	B		GH23	GH23	GH23	GH
Prodigal_38|LOCUS_00370	-	GH23(35-146)	GH23_e958	2	C_metabat_C.83.fa	UBA5704 (c)	18	B		GH23	GH23	GH23	GH
Prodigal_564|LOCUS_05310	-	GH23(342-479)	GH23_e638	3	C_metabat_C.83.fa	UBA5704 (c)	18	B	GH23	GH23	GH23	GH23	GH
Prodigal_938|LOCUS_08760	-	GH23(610-736)	GH23_e1000	2	C_metabat_C.83.fa	UBA5704 (c)	18	B		GH23	GH23	GH23	GH
Prodigal_954|LOCUS_08900	-	GH23(122-228)	GH23_e958	2	C_metabat_C.83.fa	UBA5704 (c)	18	B		GH23	GH23	GH23	GH
Prodigal_1848|LOCUS_16790	2.4.1.25:21	GH77(10-492)	GH77_e26	3	C_metabat_C.83.fa	UBA5704 (c)	18	B	GH77	GH77	GH77	GH77	GH
Prodigal_1701|LOCUS_15510	4.2.2.2:3|-	PL1_2(84-260)+CBM32(470-586)	PL1_e60+CBM32_e97	2	C_metabat_C.83.fa	UBA5704 (c)	18	B		PL1	PL1	PL1	PL	PL1
Prodigal_1164|LOCUS_10180	-|1.10.3.2:77	AA1(77-595)	AA1_e13+AA1_e33	2	CW_metabat_CW.111.fa	UBA6522 (a)	17	B		AA1	AA1	AA1	AA	AA1
Prodigal_26|LOCUS_00250	-	AA4(3-219)	AA4_e1	2	CW_metabat_CW.111.fa	UBA6522 (a)	17	B		AA4	AA4	AA4	AA	AA4
Prodigal_3363|LOCUS_26280	1.1.3.-:1	AA7(27-454)	AA7_e0	2	CW_metabat_CW.111.fa	UBA6522 (a)	17	B		AA7	AA7	AA7	AA	AA7
Prodigal_587|LOCUS_05260	2.4.1.18:57|2.4.1.18:57|2.4.1.18:14	CBM48(126-213)+GH13_9(281-579)	CBM48_e2+CBM48_e2+GH13_e200	3	CW_metabat_CW.111.fa	UBA6522 (a)	17	B	CBM48	CBM48	CBM48	CBM48	CBM
Prodigal_261|LOCUS_02390	-	GH103(12-299)	GH103_e29	2	CW_metabat_CW.111.fa	UBA6522 (a)	17	B		GH103	GH103	GH103	GH
Prodigal_2336|LOCUS_19330	-	GH15(221-583)	GH15_e57	3	CW_metabat_CW.111.fa	UBA6522 (a)	17	B	GH15	GH15	GH15	GH15	GH
Prodigal_2102|LOCUS_17580	2.4.1.-:6|2.4.1.-:1	GT2(420-649)	GH17_e66+GT2	3	CW_metabat_CW.111.fa	UBA6522 (a)	17	B	GH17	GT2	GH17	GH17	GH
Prodigal_2370|LOCUS_19560	-	GH23(499-621)	GH23_e403	3	CW_metabat_CW.111.fa	UBA6522 (a)	17	B	GH23	GH23	GH23	GH23	GH
Prodigal_3022|LOCUS_24130	-	GH23(264-414)	GH23_e867	3	CW_metabat_CW.111.fa	UBA6522 (a)	17	B	GH23	GH23	GH23	GH23	GH
Prodigal_590|LOCUS_05290	2.4.1.25:21	GH77(26-508)	GH77_e26	3	CW_metabat_CW.111.fa	UBA6522 (a)	17	B	GH77	GH77	GH77	GH77	GH
Prodigal_392|LOCUS_03780	-	AA12(122-431)	AA12_e0	2	CW_metabat_CW.131.fa	UBA6522 (b)	16	B		AA12	AA12	AA12	AA	AA12
Prodigal_1473|LOCUS_13890	-	AA6(4-193)	AA6_e2	2	CW_metabat_CW.131.fa	UBA6522 (b)	16	B		AA6	AA6	AA6	AA	AA6
Prodigal_2264|LOCUS_20850	1.1.3.-:1	AA7(44-471)	AA7_e0	2	CW_metabat_CW.131.fa	UBA6522 (b)	16	B		AA7	AA7	AA7	AA	AA7
Prodigal_3048|LOCUS_26810	1.1.3.-:1	AA7(75-430)	AA7_e0	2	CW_metabat_CW.131.fa	UBA6522 (b)	16	B		AA7	AA7	AA7	AA	AA7
Prodigal_1362|LOCUS_12900	2.4.1.18:57|2.4.1.18:57|2.4.1.18:14	CBM48(126-212)+GH13_9(281-579)	CBM48_e2+CBM48_e2+GH13_e200	3	CW_metabat_CW.131.fa	UBA6522 (b)	16	B	CBM48	CBM48	CBM48	CBM48	CBM
Prodigal_40|LOCUS_00390	-	-	CBM50_e367	2	CW_metabat_CW.131.fa	UBA6522 (b)	16	B	CBM50		CBM50	CBM50	CBM
Prodigal_555|LOCUS_05330	-	-	CBM50_e126	2	CW_metabat_CW.131.fa	UBA6522 (b)	16	B	CBM50		CBM50	CBM50	CBM
Prodigal_2013|LOCUS_18730	-	CE1(37-249)	CE1_e22	2	CW_metabat_CW.131.fa	UBA6522 (b)	16	B		CE1	CE1	CE1	CE	CE1
Prodigal_357|LOCUS_03430	3.5.1.108:18	CE11(4-275)	CE11_e22	3	CW_metabat_CW.131.fa	UBA6522 (b)	16	B	CE11	CE11	CE11	CE11	CE	CE11
Prodigal_951|LOCUS_09070	-	CE4(102-236)	CE4_e95	2	CW_metabat_CW.131.fa	UBA6522 (b)	16	B		CE4	CE4	CE4	CE	CE4
Prodigal_2016|LOCUS_18760	3.1.1.72:4	CE7(1-290)	CE7_e23	2	CW_metabat_CW.131.fa	UBA6522 (b)	16	B		CE7	CE7	CE7	CE	CE7
Prodigal_663|LOCUS_06360	-	GH103(26-320)	GH103_e38	3	CW_metabat_CW.131.fa	UBA6522 (b)	16	B	GH103	GH103	GH103	GH103	GH
Prodigal_1080|LOCUS_10280	-	GH109(2-139)	GH109_e7	2	CW_metabat_CW.131.fa	UBA6522 (b)	16	B		GH109	GH109	GH109	GH
Prodigal_2593|LOCUS_23510	-	GH15(228-590)	GH15_e57	3	CW_metabat_CW.131.fa	UBA6522 (b)	16	B	GH15	GH15	GH15	GH15	GH
Prodigal_1142|LOCUS_10860	2.4.1.-:6|2.4.1.-:1	GT2(420-649)	GH17_e66+GT2	3	CW_metabat_CW.131.fa	UBA6522 (b)	16	B	GH17	GT2	GH17	GH17	GH
Prodigal_1469|LOCUS_13850	-	GH23(93-195)	GH23_e279	2	CW_metabat_CW.131.fa	UBA6522 (b)	16	B		GH23	GH23	GH23	GH
Prodigal_545|LOCUS_05230	-|-	GH23(157-274)	GH23_e974+CBM50_e1043	3	CW_metabat_CW.131.fa	UBA6522 (b)	16	B	CBM50	GH23	GH23	GH23	GH
Prodigal_949|LOCUS_09050	-	GH23(503-624)	GH23_e403	3	CW_metabat_CW.131.fa	UBA6522 (b)	16	B	GH23	GH23	GH23	GH23	GH
Prodigal_1554|LOCUS_14640	3.2.1.52:1	GH3(52-281)	GH3_e78	2	CW_metabat_CW.131.fa	UBA6522 (b)	16	B		GH3	GH3	GH3	GH	GH3
Prodigal_2285|LOCUS_21030	2.4.1.282:1|2.4.1.216:1	GH65(319-732)	GH65_e15	3	CW_metabat_CW.131.fa	UBA6522 (b)	16	B	GH65	GH65	GH65	GH65	GH
Prodigal_950|LOCUS_09060	-	GH73(109-238)	GH73_e151	2	CW_metabat_CW.131.fa	UBA6522 (b)	16	B		GH73	GH73	GH73	GH
Prodigal_1359|LOCUS_12870	2.4.1.25:21	GH77(13-493)	GH77_e26	3	CW_metabat_CW.131.fa	UBA6522 (b)	16	B	GH77	GH77	GH77	GH77	GH
Prodigal_325|LOCUS_03120	-	AA3_2(2-542)	AA3_e57	3	CW_metabat_CW.37.fa	UBA6522 (c)	15	B	AA3	AA3	AA3	AA3	AA	AA3
Prodigal_1158|LOCUS_10800	-	AA4(5-529)	AA4_e1	2	CW_metabat_CW.37.fa	UBA6522 (c)	15	B		AA4	AA4	AA4	AA	AA4
Prodigal_1355|LOCUS_12510	-|-	AA4(2-274)+AA4(283-510)	AA4_e1+AA4_e1	2	CW_metabat_CW.37.fa	UBA6522 (c)	15	B		AA4	AA4	AA4	AA	AA4
Prodigal_997|LOCUS_09400	-	AA4(2-543)	AA4_e1	2	CW_metabat_CW.37.fa	UBA6522 (c)	15	B		AA4	AA4	AA4	AA	AA4
Prodigal_2305|LOCUS_20040	-	CE1(51-284)	CE1_e22	2	CW_metabat_CW.37.fa	UBA6522 (c)	15	B		CE1	CE1	CE1	CE	CE1
Prodigal_499|LOCUS_04760	3.1.1.-:2|3.1.1.72:1	CE15(85-474)	CE15_e14	3	CW_metabat_CW.37.fa	UBA6522 (c)	15	B	CE15	CE15	CE15	CE15	CE	CE15
Prodigal_1397|LOCUS_12860	-	GH103(24-318)	GH103_e38	3	CW_metabat_CW.37.fa	UBA6522 (c)	15	B	GH103	GH103	GH103	GH103	GH
Prodigal_790|LOCUS_07480	-	GH105(272-514)	GH105_e43	2	CW_metabat_CW.37.fa	UBA6522 (c)	15	B		GH105	GH105	GH105	GH
Prodigal_191|LOCUS_01840	-	GH15(229-591)	GH15_e57	3	CW_metabat_CW.37.fa	UBA6522 (c)	15	B	GH15	GH15	GH15	GH15	GH
Prodigal_1395|LOCUS_12840	-	GH23(284-422)	GH23_e824	3	CW_metabat_CW.37.fa	UBA6522 (c)	15	B	GH23	GH23	GH23	GH23	GH
Prodigal_2120|LOCUS_18700	-	GH23(53-151)	GH23_e279	2	CW_metabat_CW.37.fa	UBA6522 (c)	15	B		GH23	GH23	GH23	GH
Prodigal_262|LOCUS_02520	-|-	GH23(151-263)	GH23_e974+CBM50_e1043	3	CW_metabat_CW.37.fa	UBA6522 (c)	15	B	CBM50	GH23	GH23	GH23	GH
Prodigal_852|LOCUS_08050	3.2.1.52:1	GH3(52-274)	GH3_e78	2	CW_metabat_CW.37.fa	UBA6522 (c)	15	B		GH3	GH3	GH3	GH	GH3
Prodigal_540|LOCUS_05150	3.2.1.139:4|3.2.1.131:3|3.2.1.-:1	GH67(32-704)	GH67_e0	3	CW_metabat_CW.37.fa	UBA6522 (c)	15	B	GH67	GH67	GH67	GH67	GH	GH67
Prodigal_1327|LOCUS_12260	-	GH73(155-288)	GH73_e204	2	CW_metabat_CW.37.fa	UBA6522 (c)	15	B		GH73	GH73	GH73	GH
Prodigal_628|LOCUS_05490	1.10.3.2:4|1.10.3.-:1	AA1(64-563)	AA1_e46	2	CW_metabat_CW.57.fa	UBA6522 (d)	23	B		AA1	AA1	AA1	AA	AA1
Prodigal_1900|LOCUS_15680	-	AA4(3-526)	AA4_e1	2	CW_metabat_CW.57.fa	UBA6522 (d)	23	B		AA4	AA4	AA4	AA	AA4
Prodigal_1945|LOCUS_16000	-	AA4(2-538)	AA4_e1	2	CW_metabat_CW.57.fa	UBA6522 (d)	23	B		AA4	AA4	AA4	AA	AA4
Prodigal_2371|LOCUS_19090	-	AA4(4-536)	AA4_e1	2	CW_metabat_CW.57.fa	UBA6522 (d)	23	B		AA4	AA4	AA4	AA	AA4
Prodigal_267|LOCUS_02340	-	AA4(3-515)	AA4_e1	3	CW_metabat_CW.57.fa	UBA6522 (d)	23	B	AA4	AA4	AA4	AA4	AA	AA4
Prodigal_2758|LOCUS_21720	-	AA4(2-531)	AA4_e1	3	CW_metabat_CW.57.fa	UBA6522 (d)	23	B	AA4	AA4	AA4	AA4	AA	AA4
Prodigal_2714|LOCUS_21410	1.1.3.-:1	AA7(45-411)	AA7_e0	2	CW_metabat_CW.57.fa	UBA6522 (d)	23	B		AA7	AA7	AA7	AA	AA7
Prodigal_2033|LOCUS_16620	2.4.1.18:57|2.4.1.18:14	CBM48(116-198)+GH13_9(269-569)	CBM48_e2+GH13_e200	3	CW_metabat_CW.57.fa	UBA6522 (d)	23	B	CBM48	CBM48	CBM48	CBM48	CBM
Prodigal_386|LOCUS_03370	-	-	CBM50_e126	2	CW_metabat_CW.57.fa	UBA6522 (d)	23	B	CBM50		CBM50	CBM50	CBM
Prodigal_215|LOCUS_01890	3.5.1.108:18	CE11(3-274)	CE11_e22	3	CW_metabat_CW.57.fa	UBA6522 (d)	23	B	CE11	CE11	CE11	CE11	CE	CE11
Prodigal_1203|LOCUS_10300	-	CE4(81-217)	CE4_e95	2	CW_metabat_CW.57.fa	UBA6522 (d)	23	B		CE4	CE4	CE4	CE	CE4
Prodigal_353|LOCUS_03090	2.4.1.-:6|2.4.1.-:1	GH17(71-297)+GT2(415-643)	GH17_e66+GT2	3	CW_metabat_CW.57.fa	UBA6522 (d)	23	B	GH17	GH17	GH17	GH17	GH
Prodigal_1867|LOCUS_15410	-|-|-	GH23(151-268)	GH23_e974+CBM50_e496+CBM50_e1043	3	CW_metabat_CW.57.fa	UBA6522 (d)	23	B	CBM50	GH23	GH23	GH23	GH
Prodigal_3496|LOCUS_26380	-	GH23(269-417)	GH23_e867	3	CW_metabat_CW.57.fa	UBA6522 (d)	23	B	GH23	GH23	GH23	GH23	GH
Prodigal_3617|LOCUS_27020	-	GH23(88-185)	GH23_e279	2	CW_metabat_CW.57.fa	UBA6522 (d)	23	B		GH23	GH23	GH23	GH
Prodigal_1202|LOCUS_10290	-	GH73(132-258)	GH73_e151	2	CW_metabat_CW.57.fa	UBA6522 (d)	23	B		GH73	GH73	GH73	GH
Prodigal_1610|LOCUS_13470	-	GH73(158-294)	GH73_e204	2	CW_metabat_CW.57.fa	UBA6522 (d)	23	B		GH73	GH73	GH73	GH
Prodigal_154|LOCUS_01500	1.10.3.2:1	AA1(88-478)	AA1_e26	2	LW_metabat_LW.111.fa	UBA6522 (e)	36	D		AA1	AA1	AA1	AA	AA1
Prodigal_363|LOCUS_03490	1.10.3.2:4|1.10.3.-:1	AA1(66-577)	AA1_e46	2	LW_metabat_LW.111.fa	UBA6522 (e)	36	D		AA1	AA1	AA1	AA	AA1
Prodigal_1773|LOCUS_16430	-|-	AA2(86-192)	AA2_e1+AA2_e1	3	LW_metabat_LW.111.fa	UBA6522 (e)	36	D	AA0	AA2	AA2	AA2	AA	AA2
Prodigal_1908|LOCUS_17600	-	AA3_2(2-541)	AA3_e57	3	LW_metabat_LW.111.fa	UBA6522 (e)	36	D	AA3	AA3	AA3	AA3	AA	AA3
Prodigal_1021|LOCUS_09640	-	AA4(2-543)	AA4_e1	2	LW_metabat_LW.111.fa	UBA6522 (e)	36	D		AA4	AA4	AA4	AA	AA4
Prodigal_2631|LOCUS_23570	-	AA6(7-194)	AA6_e2	2	LW_metabat_LW.111.fa	UBA6522 (e)	36	D		AA6	AA6	AA6	AA	AA6
Prodigal_63|LOCUS_00630	1.1.3.-:1	AA7(75-443)	AA7_e0	2	LW_metabat_LW.111.fa	UBA6522 (e)	36	D		AA7	AA7	AA7	AA	AA7
Prodigal_678|LOCUS_06500	-	CE4(87-221)	CE4_e95	2	LW_metabat_LW.111.fa	UBA6522 (e)	36	D		CE4	CE4	CE4	CE	CE4
Prodigal_186|LOCUS_01810	-	GH103(31-325)	GH103_e38	3	LW_metabat_LW.111.fa	UBA6522 (e)	36	D	GH103	GH103	GH103	GH103	GH
Prodigal_705|LOCUS_06760	-	GH103(46-331)	GH103_e29	2	LW_metabat_LW.111.fa	UBA6522 (e)	36	D		GH103	GH103	GH103	GH
Prodigal_21|LOCUS_00210	-	GH105(258-500)	GH105_e43	2	LW_metabat_LW.111.fa	UBA6522 (e)	36	D		GH105	GH105	GH105	GH
Prodigal_815|LOCUS_07780	-	GH15(222-585)	GH15_e57	3	LW_metabat_LW.111.fa	UBA6522 (e)	36	D	GH15	GH15	GH15	GH15	GH
Prodigal_184|LOCUS_01790	-	GH23(282-420)	GH23_e867	3	LW_metabat_LW.111.fa	UBA6522 (e)	36	D	GH23	GH23	GH23	GH23	GH
Prodigal_1926|LOCUS_17740	-	GH23(100-194)	GH23_e279	2	LW_metabat_LW.111.fa	UBA6522 (e)	36	D		GH23	GH23	GH23	GH
Prodigal_279|LOCUS_02700	-	GH23(492-615)	GH23_e403	3	LW_metabat_LW.111.fa	UBA6522 (e)	36	D	GH23	GH23	GH23	GH23	GH
Prodigal_7|LOCUS_00070	3.2.1.37:21|3.2.1.55:3|3.2.1.-:1|-	GH43_11(5-301)+CBM91(332-537)	GH43_e285+CBM91_e24	3	LW_metabat_LW.111.fa	UBA6522 (e)	36	D	CBM91	GH43	GH43	GH43	GH	GH43
Prodigal_679|LOCUS_06510	-	GH73(131-258)	GH73_e151	2	LW_metabat_LW.111.fa	UBA6522 (e)	36	D		GH73	GH73	GH73	GH
Prodigal_78|LOCUS_00690	3.1.1.72:1|3.2.1.8:1	CE1(88-246)	CE1_e24	2	L_metabat_L.70.fa	UBA8139	50	E		CE1	CE1	CE1	CE	CE1
Prodigal_1290|LOCUS_10190	-	CE14(6-135)	CE14_e6	2	L_metabat_L.70.fa	UBA8139	50	E		CE14	CE14	CE14	CE	CE14
Prodigal_2317|LOCUS_17370	-	CE14(29-146)	CE14_e28	2	L_metabat_L.70.fa	UBA8139	50	E		CE14	CE14	CE14	CE	CE14
Prodigal_2914|LOCUS_21160	-	CE14(26-142)	CE14_e46	2	L_metabat_L.70.fa	UBA8139	50	E		CE14	CE14	CE14	CE	CE14
Prodigal_1016|LOCUS_08220	-	CE4(83-206)	CE4_e29	2	L_metabat_L.70.fa	UBA8139	50	E		CE4	CE4	CE4	CE	CE4
Prodigal_246|LOCUS_02130	3.2.1.21:1|3.2.1.-:1	GH1(2-393)	GH1_e49	3	L_metabat_L.70.fa	UBA8139	50	E	GH1	GH1	GH1	GH1	GH	GH1
Prodigal_70|LOCUS_00620	-	GH109(7-155)	GH109_e7	2	L_metabat_L.70.fa	UBA8139	50	E		GH109	GH109	GH109	GH
Prodigal_2242|LOCUS_16840	-	GH114(38-228)	GH114_e24	2	L_metabat_L.70.fa	UBA8139	50	E		GH114	GH114	GH114	GH
Prodigal_2675|LOCUS_19630	-	GH114(240-452)	GH114_e24	2	L_metabat_L.70.fa	UBA8139	50	E		GH114	GH114	GH114	GH
Prodigal_152|LOCUS_01330	-	GH2(9-641)	GH2_e67	3	L_metabat_L.70.fa	UBA8139	50	E	GH2	GH2	GH2	GH2	GH	GH2
Prodigal_2313|LOCUS_17340	-	GH23(296-437)	GH23_e248	2	L_metabat_L.70.fa	UBA8139	50	E		GH23	GH23	GH23	GH
Prodigal_2630|LOCUS_19350	-	GH23(265-404)	GH23_e999	2	L_metabat_L.70.fa	UBA8139	50	E		GH23	GH23	GH23	GH
Prodigal_943|LOCUS_07800	-	AA4(2-262)	AA4_e1	2	LW_metabat_LW.90.fa	UMGS416	4	A		AA4	AA4	AA4	AA	AA4
Prodigal_1076|LOCUS_08810	-	CE1(151-371)	CE1_e22	2	LW_metabat_LW.90.fa	UMGS416	4	A		CE1	CE1	CE1	CE	CE1
Prodigal_1358|LOCUS_10710	-	CE1(10-266)	CE1_e22	2	LW_metabat_LW.90.fa	UMGS416	4	A		CE1	CE1	CE1	CE	CE1
Prodigal_392|LOCUS_03370	3.1.1.73:1|3.2.1.55:1|3.2.1.8:1|-	CE1(172-394)	CBM48_e68+CE1_e22	2	LW_metabat_LW.90.fa	UMGS416	4	A		CE1	CE1	CE1	CE	CE1
Prodigal_750|LOCUS_06290	-	CE1(44-263)	CE1_e38	2	LW_metabat_LW.90.fa	UMGS416	4	A		CE1	CE1	CE1	CE	CE1
Prodigal_629|LOCUS_05360	-	CE20(80-200)+CE20(241-395)	CE20_e23	3	LW_metabat_LW.90.fa	UMGS416	4	A	CE20	CE20	CE20	CE20	CE	CE20
Prodigal_1068|LOCUS_08760	-	CE4(12-145)	CE4_e345	2	LW_metabat_LW.90.fa	UMGS416	4	A		CE4	CE4	CE4	CE	CE4
Prodigal_768|LOCUS_06430	-	CE4(114-238)	CE4_e150	2	LW_metabat_LW.90.fa	UMGS416	4	A		CE4	CE4	CE4	CE	CE4
Prodigal_812|LOCUS_06760	-	GH109(1-169)	GH109_e5	2	LW_metabat_LW.90.fa	UMGS416	4	A		GH109	GH109	GH109	GH
Prodigal_628|LOCUS_05350	2.4.1.7:1	GH13_18(36-371)	GH13_e117	3	LW_metabat_LW.90.fa	UMGS416	4	A	GH13	GH13	GH13	GH13	GH
Prodigal_1412|LOCUS_11100	-	GH146(13-557)	GH146_e7	3	LW_metabat_LW.90.fa	UMGS416	4	A	GH146	GH146	GH146	GH146	GH
Prodigal_586|LOCUS_05030	-	GH18(134-423)	GH18_e396	2	LW_metabat_LW.90.fa	UMGS416	4	A		GH18	GH18	GH18	GH
Prodigal_281|LOCUS_02450	3.2.1.17:12|4.2.2.n1:6	GH23(84-201)	GH23_e335	2	LW_metabat_LW.90.fa	UMGS416	4	A		GH23	GH23	GH23	GH
Prodigal_1214|LOCUS_09750	-	GH26(129-332)	GH26_e6	2	LW_metabat_LW.90.fa	UMGS416	4	A		GH26	GH26	GH26	GH	GH26
Prodigal_213|LOCUS_01890	3.2.1.37:92|3.2.1.55:39|3.2.1.21:1|3.2.1.6:1|3.2.1.73:1	GH3(37-279)	GH3_e0	3	LW_metabat_LW.90.fa	UMGS416	4	A	GH3	GH3	GH3	GH3	GH	GH3
Prodigal_36|LOCUS_00340	3.2.1.177:1	GH31_4(202-655)	GH31_e0	3	LW_metabat_LW.90.fa	UMGS416	4	A	GH31	GH31	GH31	GH31	GH
Prodigal_673|LOCUS_05680	3.2.1.22:9	GH4(44-221)	GH4_e17	3	LW_metabat_LW.90.fa	UMGS416	4	A	GH4	GH4	GH4	GH4	GH
Prodigal_910|LOCUS_07530	-	GH4(4-183)	GH4_e26	3	LW_metabat_LW.90.fa	UMGS416	4	A	GH4	GH4	GH4	GH4	GH
Prodigal_393|LOCUS_03380	-	GH5_42(23-223)	GH5_e241	3	LW_metabat_LW.90.fa	UMGS416	4	A	GH0	GH5	GH5	GH5	GH	GH5
Prodigal_1217|LOCUS_09770	3.2.1.55:37	GH51_1(7-533)	GH51_e0	3	LW_metabat_LW.90.fa	UMGS416	4	A	GH51	GH51	GH51	GH51	GH	GH51
Prodigal_33|LOCUS_00310	3.2.1.55:27	GH51_1(5-493)	GH51_e19	3	LW_metabat_LW.90.fa	UMGS416	4	A	GH51	GH51	GH51	GH51	GH	GH51
Prodigal_34|LOCUS_00320	3.2.1.55:27	GH51_1(4-491)	GH51_e19	3	LW_metabat_LW.90.fa	UMGS416	4	A	GH51	GH51	GH51	GH51	GH	GH51
Prodigal_664|LOCUS_05620	3.2.1.55:37	GH51_1(5-530)	GH51_e0	3	LW_metabat_LW.90.fa	UMGS416	4	A	GH51	GH51	GH51	GH51	GH	GH51
Prodigal_1322|LOCUS_10490	3.2.1.-:3|3.2.1.63:2	GH95(3-745)	GH95_e1	3	LW_metabat_LW.90.fa	UMGS416	4	A	GH95	GH95	GH95	GH95	GH
Prodigal_663|LOCUS_05610	-	GH95(35-775)	GH95_e12	3	LW_metabat_LW.90.fa	UMGS416	4	A	GH95	GH95	GH95	GH95	GH
Prodigal_1557|LOCUS_14940	1.1.3.-:2	AA7(55-488)	AA7_e5	2	CW_23909.fna	Woeseiaceae (a)	14	B		AA7	AA7	AA7	AA	AA7
Prodigal_1618|LOCUS_15510	1.1.3.-:1	AA7(78-431)	AA7_e0	2	CW_23909.fna	Woeseiaceae (a)	14	B		AA7	AA7	AA7	AA	AA7
Prodigal_1648|LOCUS_15790	1.1.3.-:1	AA7(78-426)	AA7_e0	2	CW_23909.fna	Woeseiaceae (a)	14	B		AA7	AA7	AA7	AA	AA7
Prodigal_870|LOCUS_08440	1.1.3.-:1	AA7(57-257)	AA7_e0	2	CW_23909.fna	Woeseiaceae (a)	14	B		AA7	AA7	AA7	AA	AA7
Prodigal_169|LOCUS_01660	-	CE1(29-242)	CE1_e22	2	CW_23909.fna	Woeseiaceae (a)	14	B		CE1	CE1	CE1	CE	CE1
Prodigal_1985|LOCUS_18860	3.5.1.108:18	CE11(4-275)	CE11_e22	3	CW_23909.fna	Woeseiaceae (a)	14	B	CE11	CE11	CE11	CE11	CE	CE11
Prodigal_665|LOCUS_06490	-	CE4(61-202)	CE4_e210	2	CW_23909.fna	Woeseiaceae (a)	14	B		CE4	CE4	CE4	CE	CE4
Prodigal_2034|LOCUS_19310	-	GH15(220-584)	GH15_e57	3	CW_23909.fna	Woeseiaceae (a)	14	B	GH15	GH15	GH15	GH15	GH
Prodigal_187|LOCUS_01840	-	GH172(62-319)	GH172_e10	3	CW_23909.fna	Woeseiaceae (a)	14	B	GH172	GH172	GH172	GH172	GH
Prodigal_1237|LOCUS_11970	-	GH23(491-614)	GH23_e879	3	CW_23909.fna	Woeseiaceae (a)	14	B	GH23	GH23	GH23	GH23	GH
Prodigal_1631|LOCUS_15640	-	GH23(72-176)	GH23_e713	2	CW_23909.fna	Woeseiaceae (a)	14	B		GH23	GH23	GH23	GH
Prodigal_1660|LOCUS_15890	-|-|-	GH23(127-264)	GH23_e418+CBM50_e573+CBM50_e496	3	CW_23909.fna	Woeseiaceae (a)	14	B	CBM50	GH23	GH23	GH23	GH
Prodigal_87|LOCUS_00860	-|-	GH23(145-264)	GH23_e974+CBM50_e632	3	CW_23909.fna	Woeseiaceae (a)	14	B	CBM50	GH23	GH23	GH23	GH
Prodigal_892|LOCUS_08660	-	GH23(360-498)	GH23_e638	3	CW_23909.fna	Woeseiaceae (a)	14	B	GH23	GH23	GH23	GH23	GH
Prodigal_546|LOCUS_05330	3.2.1.52:1	GH3(58-281)	GH3_e78	3	CW_23909.fna	Woeseiaceae (a)	14	B	GH3	GH3	GH3	GH3	GH	GH3
Prodigal_723|LOCUS_06790	-	AA4(3-520)	AA4_e1	3	P_metabat_P.50.fa	Woeseiaceae (b)	66	F	AA4	AA4	AA4	AA4	AA	AA4
Prodigal_1022|LOCUS_09510	-	AA6(4-193)	AA6_e2	2	P_metabat_P.50.fa	Woeseiaceae (b)	66	F		AA6	AA6	AA6	AA	AA6
Prodigal_1304|LOCUS_12030	-	AA6(5-188)	AA6_e3	2	P_metabat_P.50.fa	Woeseiaceae (b)	66	F		AA6	AA6	AA6	AA	AA6
Prodigal_2930|LOCUS_24690	1.1.3.-:1	AA7(11-370)	AA7_e0	2	P_metabat_P.50.fa	Woeseiaceae (b)	66	F		AA7	AA7	AA7	AA	AA7
Prodigal_2931|LOCUS_24700	1.1.3.-:1	AA7(76-440)	AA7_e0	2	P_metabat_P.50.fa	Woeseiaceae (b)	66	F		AA7	AA7	AA7	AA	AA7
Prodigal_1168|LOCUS_10810	2.4.1.18:57|2.4.1.18:57|2.4.1.18:14	CBM48(127-210)+GH13_9(282-579)	CBM48_e2+CBM48_e2+GH13_e200	3	P_metabat_P.50.fa	Woeseiaceae (b)	66	F	CBM48	CBM48	CBM48	CBM48	CBM
Prodigal_83|LOCUS_00800	-	-	CBM50_e126	2	P_metabat_P.50.fa	Woeseiaceae (b)	66	F	CBM50		CBM50	CBM50	CBM
Prodigal_865|LOCUS_08090	-	-	CBM50_e367	2	P_metabat_P.50.fa	Woeseiaceae (b)	66	F	CBM50		CBM50	CBM50	CBM
Prodigal_2000|LOCUS_17970	-	CE20(102-220)+CE20(406-532)	CE20_e33	3	P_metabat_P.50.fa	Woeseiaceae (b)	66	F	CE20	CE20	CE20	CE20	CE	CE20
Prodigal_904|LOCUS_08440	3.5.1.41:1	-	CE4_e177	2	P_metabat_P.50.fa	Woeseiaceae (b)	66	F	CE4		CE4	CE4	CE	CE4
Prodigal_1582|LOCUS_14470	3.2.1.8:1	GH10(3-330)	GH10_e23	2	P_metabat_P.50.fa	Woeseiaceae (b)	66	F		GH10	GH10	GH10	GH	GH10
Prodigal_1976|LOCUS_17780	-	GH103(33-322)	GH103_e29	3	P_metabat_P.50.fa	Woeseiaceae (b)	66	F	GH103	GH103	GH103	GH103	GH
Prodigal_2107|LOCUS_18800	-	GH13_18(93-433)	GH13_e237	3	P_metabat_P.50.fa	Woeseiaceae (b)	66	F	GH13	GH13	GH13	GH13	GH
Prodigal_2312|LOCUS_20410	-	GH13_2(89-404)	GH13_e216	3	P_metabat_P.50.fa	Woeseiaceae (b)	66	F	GH13	GH13	GH13	GH13	GH
Prodigal_1127|LOCUS_10440	-	GH172(92-349)	GH172_e10	3	P_metabat_P.50.fa	Woeseiaceae (b)	66	F	GH172	GH172	GH172	GH172	GH
Prodigal_1944|LOCUS_17530	3.2.1.23:2	GH2(17-623)	GH2_e127	3	P_metabat_P.50.fa	Woeseiaceae (b)	66	F	GH2	GH2	GH2	GH2	GH	GH2
Prodigal_1018|LOCUS_09470	-	GH23(84-184)	GH23_e279	2	P_metabat_P.50.fa	Woeseiaceae (b)	66	F		GH23	GH23	GH23	GH
Prodigal_1428|LOCUS_13100	-|-	GH23(154-273)	GH23_e974+CBM50_e632	3	P_metabat_P.50.fa	Woeseiaceae (b)	66	F	CBM50	GH23	GH23	GH23	GH
Prodigal_973|LOCUS_09070	3.2.1.63:1|3.2.1.51:1	GH29(34-352)	GH29_e63	3	P_metabat_P.50.fa	Woeseiaceae (b)	66	F	GH29	GH29	GH29	GH29	GH
Prodigal_1281|LOCUS_11820	3.2.1.21:1|3.2.1.37:1	GH3(118-352)	GH3_e209	3	P_metabat_P.50.fa	Woeseiaceae (b)	66	F	GH3	GH3	GH3	GH3	GH	GH3
Prodigal_2664|LOCUS_23000	3.2.1.21:3|3.2.1.74:3|3.2.1.-:3|3.2.1.6:2|3.2.1.155:1	GH3(137-358)	GH3_e227	3	P_metabat_P.50.fa	Woeseiaceae (b)	66	F	GH3	GH3	GH3	GH3	GH	GH3
Prodigal_428|LOCUS_04080	3.2.1.52:1	GH3(49-282)	GH3_e78	3	P_metabat_P.50.fa	Woeseiaceae (b)	66	F	GH3	GH3	GH3	GH3	GH	GH3
Prodigal_1836|LOCUS_16620	3.2.1.28:18	GH37(23-499)	GH37_e6	3	P_metabat_P.50.fa	Woeseiaceae (b)	66	F	GH37	GH37	GH37	GH37	GH
Prodigal_2137|LOCUS_19060	3.2.1.55:27	GH51_1(35-525)	GH51_e19	3	P_metabat_P.50.fa	Woeseiaceae (b)	66	F	GH51	GH51	GH51	GH51	GH	GH51
Prodigal_1279|LOCUS_11800	3.2.1.139:4|3.2.1.131:3|3.2.1.-:1	GH67(37-706)	GH67_e0	3	P_metabat_P.50.fa	Woeseiaceae (b)	66	F	GH67	GH67	GH67	GH67	GH	GH67
Prodigal_1166|LOCUS_10790	2.4.1.25:21	GH77(33-506)	GH77_e26	3	P_metabat_P.50.fa	Woeseiaceae (b)	66	F	GH77	GH77	GH77	GH77	GH
Prodigal_1578|LOCUS_14430	3.2.1.4:19|3.2.1.91:5|3.2.1.73:3|3.2.1.-:2	GH9(128-614)	GH9_e1	3	P_metabat_P.50.fa	Woeseiaceae (b)	66	F	GH9	GH9	GH9	GH9	GH	GH9
Prodigal_974|LOCUS_09080	3.2.1.4:19|3.2.1.91:5|3.2.1.73:3|3.2.1.-:2	GH9(365-792)	GH9_e1	3	P_metabat_P.50.fa	Woeseiaceae (b)	66	F	GH0	GH9	GH9	GH9	GH	GH9
Prodigal_2302|LOCUS_20330	4.2.2.2:2	PL1_2(91-278)	PL1_e20	3	P_metabat_P.50.fa	Woeseiaceae (b)	66	F	PL1	PL1	PL1	PL1	PL	PL1
Prodigal_317|LOCUS_03050	-|-|-|-	CBM11(62-216)+CBM11(268-407)+GH16_3(737-980)	CBM11_e4+CBM11_e4+GH16_e211+CBM11_e4	3	C_metabat_C.121.fa	ZC4RG35 (a)	62	F	CBM11	CBM11	CBM11	CBM11	CBM
Prodigal_1038|LOCUS_09930	3.2.1.141:34|3.2.1.1:4|-	GH13_10(116-431)	CBM48_e0+GH13_e127	3	C_metabat_C.121.fa	ZC4RG35 (a)	62	F	CBM48	GH13	CBM48	CBM48	CBM
Prodigal_1039|LOCUS_09940	2.4.1.18:57|2.4.1.18:14	CBM48(30-106)+GH13_9(178-478)	CBM48_e2+GH13_e200	3	C_metabat_C.121.fa	ZC4RG35 (a)	62	F	CBM48	CBM48	CBM48	CBM48	CBM
Prodigal_1313|LOCUS_12510	3.2.1.68:75|2.4.1.25:4|3.2.1.-:1|3.2.1.68:15|3.2.1.-:1	GH13_11(171-520)	CBM48_e3+GH13_e48	3	C_metabat_C.121.fa	ZC4RG35 (a)	62	F	CBM48	GH13	CBM48	CBM48	CBM
Prodigal_1319|LOCUS_12570	-|2.4.1.18:14	CBM48(25-106)+GH13_9(169-470)	CBM48_e87+GH13_e200	3	C_metabat_C.121.fa	ZC4RG35 (a)	62	F	CBM48	CBM48	CBM48	CBM48	CBM
Prodigal_2659|LOCUS_24530	-|2.4.1.18:14	CBM48(4-81)+GH13_9(151-451)	CBM48_e87+GH13_e200	3	C_metabat_C.121.fa	ZC4RG35 (a)	62	F	CBM48	CBM48	CBM48	CBM48	CBM
Prodigal_2958|LOCUS_26870	-	CE14(17-133)	CE14_e28	2	C_metabat_C.121.fa	ZC4RG35 (a)	62	F		CE14	CE14	CE14	CE	CE14
Prodigal_403|LOCUS_03880	3.5.1.89:6	CE14(5-137)	CE14_e2	2	C_metabat_C.121.fa	ZC4RG35 (a)	62	F		CE14	CE14	CE14	CE	CE14
Prodigal_3133|LOCUS_28120	-	CE4(56-196)	CE4_e274	2	C_metabat_C.121.fa	ZC4RG35 (a)	62	F		CE4	CE4	CE4	CE	CE4
Prodigal_121|LOCUS_01180	3.2.1.21:51|3.2.1.38:2|3.2.1.-:1	GH1(2-436)	GH1_e107	3	C_metabat_C.121.fa	ZC4RG35 (a)	62	F	GH1	GH1	GH1	GH1	GH	GH1
Prodigal_3142|LOCUS_28190	-	GH109(3-148)	GH109_e7	2	C_metabat_C.121.fa	ZC4RG35 (a)	62	F		GH109	GH109	GH109	GH
Prodigal_102|LOCUS_01000	2.4.1.352:2	GH13_18(92-431)	GH13_e137	3	C_metabat_C.121.fa	ZC4RG35 (a)	62	F	GH13	GH13	GH13	GH13	GH
Prodigal_2088|LOCUS_19510	5.4.99.16:7	GH13_16(28-381)	GH13_e0	3	C_metabat_C.121.fa	ZC4RG35 (a)	62	F	GH13	GH13	GH13	GH13	GH
Prodigal_2151|LOCUS_20060	3.2.1.41:10|3.2.1.1:3|3.2.1.68:1	GH13(106-482)	GH13_e183	3	C_metabat_C.121.fa	ZC4RG35 (a)	62	F	GH13	GH13	GH13	GH13	GH
Prodigal_298|LOCUS_02880	3.2.1.41:10|3.2.1.1:3|3.2.1.68:1|3.2.1.41:5|3.2.1.1:4|3.2.1.41:5|3.2.1.1:4|3.2.1.41:5|3.2.1.1:4|3.2.1.41:28|3.2.1.68:4|3.2.1.41:2	GH13_13(501-855)+CBM41(1110-1218)+CBM41(1224-1331)+CBM41(1338-1436)+GH13_13(1745-2142)	GH13_e183+CBM41_e2+CBM41_e2+CBM41_e2+CBM48_e30+GH13_e108	3	C_metabat_C.121.fa	ZC4RG35 (a)	62	F	CBM41	GH13	GH13	GH13	GH
Prodigal_41|LOCUS_00400	3.2.1.20:2	GH13_30(43-404)	GH13_e234	3	C_metabat_C.121.fa	ZC4RG35 (a)	62	F	GH13	GH13	GH13	GH13	GH
Prodigal_435|LOCUS_04200	3.2.1.54:7|3.2.1.133:3|3.2.1.135:2	GH13_20(159-491)	GH13_e225	3	C_metabat_C.121.fa	ZC4RG35 (a)	62	F	GH13	GH13	GH13	GH13	GH
Prodigal_319|LOCUS_03070	2.4.1.97:1	GH149(16-1136)	GH149_e0	3	C_metabat_C.121.fa	ZC4RG35 (a)	62	F	GH149	GH149	GH149	GH149	GH
Prodigal_55|LOCUS_00540	3.2.1.39:2	GH16_3(78-313)	GH16_e325	2	C_metabat_C.121.fa	ZC4RG35 (a)	62	F		GH16	GH16	GH16	GH	GH16
Prodigal_1124|LOCUS_10760	-	GH26(98-235)	GH26_e45	2	C_metabat_C.121.fa	ZC4RG35 (a)	62	F		GH26	GH26	GH26	GH	GH26
Prodigal_1127|LOCUS_10790	-	GH26(103-249)	GH26_e45	2	C_metabat_C.121.fa	ZC4RG35 (a)	62	F		GH26	GH26	GH26	GH	GH26
Prodigal_488|LOCUS_04700	-	GH26(109-230)	GH26_e45	2	C_metabat_C.121.fa	ZC4RG35 (a)	62	F		GH26	GH26	GH26	GH	GH26
Prodigal_318|LOCUS_03060	3.2.1.-:5|3.2.1.21:3	GH3(68-308)	GH3_e107	3	C_metabat_C.121.fa	ZC4RG35 (a)	62	F	GH3	GH3	GH3	GH3	GH	GH3
Prodigal_829|LOCUS_07940	3.2.1.80:10|3.2.1.65:10|3.2.1.26:7|3.2.1.153:5|3.2.1.64:3|2.4.1.99:3	GH32(1-277)	GH32_e16	2	C_metabat_C.121.fa	ZC4RG35 (a)	62	F		GH32	GH32	GH32	GH
Prodigal_828|LOCUS_07930	3.2.1.22:8	GH36(9-651)	GH36_e2	3	C_metabat_C.121.fa	ZC4RG35 (a)	62	F	GH36	GH36	GH36	GH36	GH
Prodigal_1037|LOCUS_09920	3.2.1.1:1	GH57(47-395)	GH57_e36	3	C_metabat_C.121.fa	ZC4RG35 (a)	62	F	GH57	GH57	GH57	GH57	GH
Prodigal_509|LOCUS_04890	2.4.1.282:1|2.4.1.216:1	GH65(320-728)	GH65_e15	3	C_metabat_C.121.fa	ZC4RG35 (a)	62	F	GH65	GH65	GH65	GH65	GH
Prodigal_282|LOCUS_02670	-	AA3_2(2-519)	AA3_e57	3	C_metabat_C.98.fa	ZC4RG35 (b)	63	F	AA3	AA3	AA3	AA3	AA	AA3
Prodigal_37|LOCUS_00360	3.2.1.68:75|2.4.1.25:4|3.2.1.-:1|3.2.1.68:15|3.2.1.-:1	GH13_11(176-526)	CBM48_e3+GH13_e48	3	C_metabat_C.98.fa	ZC4RG35 (b)	63	F	CBM48	GH13	CBM48	CBM48	CBM
Prodigal_536|LOCUS_05020	2.4.1.18:57|2.4.1.18:14	CBM48(25-106)+GH13_9(169-470)	CBM48_e2+GH13_e200	3	C_metabat_C.98.fa	ZC4RG35 (b)	63	F	CBM48	CBM48	CBM48	CBM48	CBM
Prodigal_829|LOCUS_07740	-|-	GH130(176-348)	GH137_e1+GH130_e15	2	C_metabat_C.98.fa	ZC4RG35 (b)	63	F		GH130	GH130	CE1	CE	CE1
Prodigal_2281|LOCUS_19480	-	CE14(27-143)	CE14_e46	2	C_metabat_C.98.fa	ZC4RG35 (b)	63	F		CE14	CE14	CE14	CE	CE14
Prodigal_333|LOCUS_03140	-	CE14(12-128)	CE14_e28	2	C_metabat_C.98.fa	ZC4RG35 (b)	63	F		CE14	CE14	CE14	CE	CE14
Prodigal_232|LOCUS_02220	3.2.1.21:51|3.2.1.38:2|3.2.1.-:1	GH1(2-434)	GH1_e107	3	C_metabat_C.98.fa	ZC4RG35 (b)	63	F	GH1	GH1	GH1	GH1	GH	GH1
Prodigal_475|LOCUS_04460	3.2.1.20:1|3.2.1.10:1	GH13_23(34-371)	GH13_e182	3	C_metabat_C.98.fa	ZC4RG35 (b)	63	F	GH13	GH13	GH13	GH13	GH
Prodigal_635|LOCUS_05980	3.2.1.20:2	GH13_30(29-392)	GH13_e234	3	C_metabat_C.98.fa	ZC4RG35 (b)	63	F	GH13	GH13	GH13	GH13	GH
Prodigal_251|LOCUS_02400	-	GH26(124-283)	GH26_e45	2	C_metabat_C.98.fa	ZC4RG35 (b)	63	F		GH26	GH26	GH26	GH	GH26
Prodigal_403|LOCUS_03800	2.4.1.64:4	GH65(336-708)	GH65_e2	3	C_metabat_C.98.fa	ZC4RG35 (b)	63	F	GH65	GH65	GH65	GH65	GH
Prodigal_87|LOCUS_00840	2.4.1.25:21	GH77(15-477)	GH77_e26	3	C_metabat_C.98.fa	ZC4RG35 (b)	63	F	GH77	GH77	GH77	GH77	GH
Prodigal_2257|LOCUS_19300	-	PL12_3(404-547)	PL12_e24	3	C_metabat_C.98.fa	ZC4RG35 (b)	63	F	PL12	PL12	PL12	PL12	PL	PL12

## Sheet: Normalized Values
MAGs	AA1	AA10	AA12	AA2	AA3	AA4	AA5	AA6	AA7	CBM11	CBM12	CBM13	CBM16	CBM2	CBM20	CBM22	CBM26	CBM32	CBM34	CBM35	CBM38	CBM4	CBM47	CBM48	CBM5	CBM50	CBM51	CBM57	CBM6	CBM61	CBM67	CBM9	CE1	CE11	CE12	CE14	CE15	CE16	CE17	CE19	CE20	CE3	CE4	CE6	CE7	CE9	GH1	GH10	GH102
70-9 (a)	0	0	0	0	0	0	0	0	2.08073	0	0	0	0	0	0	0	0	0	0	0	0	0	0	0	0	0	0	0	0	0	0	0	0	0	0	0	0	0	0	0	0	0	2.08073	0	0	0	0	0	0
70-9 (b)	0	0	0	0	1.41463	0	0	0	1.41463	0	0	0	0	0	0	0	0	0	0	0	0	0	0	0	0	0	0	0	0	0	0	0	0	0	0	0	0	0	0	0	0	0	2.82925	0	0	0	0	0	0
Alkalibacteraceae	0	0	0	0	0	0	0	0	0	0	0	0	0	0	0	0	0	0	0	0	0	0	0	1.16387	0	0	0	0	0	0	0	0	0	0	0	0	0	0	0	0	0	0	2.32775	0	0	0	0	0	0
Anaerolineaceae	0	0	0	0	0	0	0	0	0	0	0	0	0	0	0	0	0	0	0	0	0	0	0	0	0	4.49978	0	0	0	0	0	0	2.99985	0	0	1.49993	0	0	0	0	0	0	1.49993	0	0	0	2.99985	0	0
Bacillaceae_C	0	0	0	0	0	1.14969	0	0	0	0	0	0	0	0	0	0	0	0	0	0	0	0	0	1.14969	0	6.89814	0	0	0	0	0	0	0	0	0	2.29938	0	0	0	0	0	0	4.59876	0	0	0	0	0	0
Balneolaceae (a)	0	0	0	0	0	0	0	0	0	0	0	0	0	0	0	0	0	0	0	0	0	0	0	0	0	0	0	0	0	0	0	1.4298	0	0	0	2.85959	0	0	0	0	0	1.4298	0	0	0	0	0	0	0
Balneolaceae (b)	0	0	0	0	0	0	0	0	0	0	0	0	0	0	0	0	0	0	0	0	0	0	0	0	0	0	0	0	0	0	0	1.41163	1.41163	0	0	1.41163	2.82326	0	0	0	0	0	0	0	0	0	0	4.2349	0
CECT-8803	1.57704	0	0	0	3.15408	0	0	0	1.57704	0	0	0	0	0	0	0	0	0	0	0	0	0	0	0	0	0	0	0	0	0	0	0	0	0	0	1.57704	0	0	0	0	0	0	0	0	0	0	0	0	0
Cellulomonadaceae	1.11857	3.3557	0	0	2.23714	0	1.11857	0	2.23714	0	1.11857	7.82998	0	4.47427	0	1.11857	0	5.59284	0	1.11857	0	0	0	3.3557	2.23714	0	0	1.11857	0	1.11857	0	0	2.23714	0	0	3.3557	0	0	0	0	0	0	2.23714	0	1.11857	1.11857	2.23714	2.23714	0
Cyclobacteriaceae	0	0	0	0	0	1.23122	0	0	0	0	0	0	0	0	0	0	0	0	0	0	0	0	0	1.23122	0	0	0	0	0	0	0	0	0	1.23122	0	3.69367	0	0	0	1.23122	1.23122	0	1.23122	0	1.23122	0	1.23122	0	0
DSSB01	0	0	0	0	0	0	0	0	1.09457	0	0	0	0	0	0	0	0	0	0	0	0	0	0	0	0	0	0	0	0	0	0	0	0	0	0	0	0	0	0	0	0	0	1.09457	0	0	0	0	0	0
Desulfobacterales	0	0	0	0	0	1.2663	0	0	1.2663	0	0	0	0	0	0	0	0	0	0	0	0	0	0	0	0	0	0	0	0	0	0	0	1.2663	0	0	0	0	0	0	0	0	0	1.2663	0	0	0	0	0	1.2663
Domibacillaceae	0	0	0	0	0	1.40371	0	0	0	0	0	0	0	0	0	0	0	0	0	0	0	0	0	0	0	4.21112	0	0	0	0	0	0	0	0	0	0	0	0	0	0	0	0	4.21112	0	0	1.40371	0	0	0
E44-bin32 (a)	0	0	0	0	0	0	0	0	0	0	0	0	0	0	0	0	0	0	0	0	0	0	0	0	0	0	0	0	0	0	0	0	0	0	0	1.39237	0	0	0	0	0	0	1.39237	0	0	0	1.39237	0	0
E44-bin32 (b)	0	0	0	0	0	1.41223	0	0	0	0	0	0	0	0	0	0	0	0	0	0	0	0	0	0	0	0	0	0	0	0	0	0	4.23669	0	0	0	0	0	0	0	0	0	0	0	0	0	1.41223	0	0
Flavobacteriaceae	0	0	0	0	0	0	0	0	0	0	0	0	0	0	0	0	0	0	0	0	0	0	0	1.07677	0	1.07677	0	0	0	0	1.07677	0	1.07677	1.07677	0	1.07677	0	0	0	0	1.07677	0	0	0	0	0	0	0	0
GWA1-39-11	1.70358	0	0	0	0	0	0	0	0	0	0	0	0	0	0	0	0	0	0	0	0	0	0	0	0	0	0	0	0	0	0	0	0	0	0	0	0	0	0	0	0	0	0	0	0	0	0	0	0
GWC2-71-9	0	0	0	0	0	1.57953	0	0	3.15906	0	0	0	0	0	0	0	0	0	0	0	0	0	0	0	0	0	0	0	0	0	0	0	1.57953	0	0	1.57953	1.57953	0	0	0	0	0	9.47718	0	0	1.57953	0	0	0
HGW-15	1.09541	0	0	0	0	5.47705	0	1.09541	0	0	0	0	0	0	0	0	0	0	0	0	0	0	0	0	0	0	0	0	0	0	0	0	1.09541	0	0	0	0	0	0	0	0	0	0	0	0	0	0	0	0
HXMU1428-3	0	0	0	0	0	0	0	0	0	0	0	0	0	0	0	0	0	0	0	0	0	0	0	0	0	0	0	0	0	0	0	0	0	0	0	0	0	0	0	0	0	0	1.40154	0	0	0	0	0	0
Halobacteriales (a)	0	0	0	0	0	0	0	0	1.10059	0	0	0	0	0	0	0	0	0	0	0	0	0	0	0	0	0	0	1.10059	0	0	0	1.10059	0	0	0	0	0	0	0	1.10059	0	0	1.10059	0	0	0	0	0	0
Halobacteriales (b)	0	0	0	0	0	0	0	0	1.64366	0	0	0	0	0	0	0	0	0	0	0	0	0	0	0	0	0	0	0	0	0	0	0	0	0	0	0	0	0	0	1.64366	0	0	3.28731	0	0	0	0	0	0
Hyphomicrobiaceae	0	0	0	0	0	1.98728	0	0	0	0	0	0	0	0	0	0	0	0	0	0	0	0	0	0	0	1.98728	0	0	0	0	0	0	0	1.98728	0	0	0	0	0	0	0	0	11.9237	0	0	0	0	0	3.97456
J153	1.13263	0	0	0	1.13263	0	0	0	0	0	0	0	0	0	0	0	0	0	0	0	0	0	0	0	0	0	0	0	0	0	0	0	0	0	0	0	0	0	0	0	0	0	3.39789	0	0	0	0	0	0
JABDQX01	0	0	0	0	0	0	0	1.28684	1.28684	0	0	0	0	0	0	0	1.28684	0	0	0	0	0	0	2.57367	0	0	0	0	0	0	0	0	0	1.28684	0	1.28684	0	2.57367	0	0	0	0	1.28684	0	0	0	0	0	0
JACQBZ02	0	0	0	0	0	0	0	0	0	0	0	0	0	0	0	0	0	0	0	0	0	0	0	3.52651	0	0	0	0	0	0	1.1755	0	0	0	0	1.1755	0	0	0	0	0	0	1.1755	0	0	0	0	0	0
JAENVV01	0	0	0	0	1.22519	0	0	0	2.45038	0	0	0	0	0	0	0	0	0	0	0	0	0	0	0	0	0	0	0	0	0	0	0	0	0	0	2.45038	0	0	0	0	0	0	2.45038	0	0	1.22519	1.22519	0	0
JAFGWO01	0	0	0	0	0	0	0	0	0	0	0	0	0	0	0	0	0	0	0	0	0	0	0	2.60824	0	0	0	0	0	0	0	0	0	1.30412	0	0	0	0	0	0	0	0	0	0	0	0	0	0	1.30412
Jiangellales	0	0	0	0	0	0	0	0	1.3009	0	0	0	0	0	0	0	0	0	0	0	0	0	0	1.3009	0	1.3009	0	0	0	0	0	0	0	0	0	2.6018	0	0	0	0	0	0	1.3009	0	0	1.3009	1.3009	0	0
Lacipirellulaceae	0	0	0	0	0	0	0	0	0	0	0	0	0	0	0	0	0	0	0	0	0	0	0	1.46542	0	0	1.46542	0	0	0	1.46542	0	0	0	1.46542	1.46542	0	1.46542	0	0	0	0	0	0	0	0	0	1.46542	0
Latescibacterales	0	0	0	0	0	1.01112	0	0	0	0	0	0	0	0	0	0	0	0	0	0	0	0	0	5.05561	0	0	0	1.01112	0	0	0	2.02224	8.08898	1.01112	0	2.02224	4.04449	0	0	0	0	0	3.03337	1.01112	0	0	0	3.03337	0
Methyloligellaceae	2.28076	0	0	0	1.14038	0	1.14038	0	0	0	0	0	0	0	0	0	0	0	0	0	0	0	0	0	0	0	0	0	0	0	0	0	0	1.14038	0	0	0	0	0	0	0	0	2.28076	0	0	0	0	0	1.14038
Micropepsaceae	1.83587	0	0	0	0	0	0	0	0	0	0	0	0	0	0	0	0	0	0	0	0	0	0	0	0	0	0	0	0	0	0	0	0	0	0	0	0	0	0	0	0	0	0	0	0	0	0	0	0
Nitriliruptoraceae	0	0	0	0	1.27453	2.54907	0	1.27453	0	0	0	0	0	0	0	0	0	0	0	0	0	0	0	1.27453	0	0	0	0	0	0	0	0	0	0	0	3.8236	0	0	0	0	0	0	0	0	0	1.27453	0	0	0
Nitrososphaeraceae (a)	0	0	0	0	0	0	0	0	0	0	0	0	0	0	0	0	0	0	0	0	0	0	0	0	0	0	0	0	0	0	0	0	0	0	0	0	0	0	0	0	0	0	0	0	0	0	0	0	0
Nitrososphaeraceae (b)	0	0	0	0	0	0	0	0	0	0	0	0	0	0	0	0	0	0	0	0	0	0	0	0	0	0	0	0	0	0	0	0	0	0	0	0	0	0	0	0	0	0	1.28353	0	0	0	0	0	0
Paenibacillaceae	0	0	0	0	0	0	0	0	0	0	0	0	0	0	0	0	0	0	0	0	0	0	0	0	0	0	0	0	0	0	0	0	1.92308	0	0	1.92308	0	0	0	0	0	0	1.92308	0	0	0	0	1.92308	0
Planctomycetaceae	1.12969	0	0	0	0	0	0	0	0	0	0	0	0	1.12969	0	0	0	0	0	0	1.12969	0	1.12969	3.38906	0	1.12969	5.64844	0	0	0	2.25938	0	1.12969	1.12969	2.25938	5.64844	1.12969	0	1.12969	7.90782	1.12969	0	3.38906	0	1.12969	0	0	1.12969	0
Promineofilaceae (a)	0	0	0	0	0	0	0	0	0	0	0	0	0	0	0	0	0	0	0	0	0	0	0	0	0	1.48434	0	0	0	1.48434	0	0	0	0	0	1.48434	0	0	0	0	0	0	2.96868	0	0	0	0	0	0
Promineofilaceae (b)	0	0	0	0	0	0	0	0	1.2276	0	0	0	0	0	1.2276	0	0	0	0	0	0	0	0	1.2276	0	1.2276	0	0	0	0	0	2.45519	3.68279	0	0	2.45519	0	0	0	0	0	0	3.68279	0	0	0	1.2276	0	0
Pseudonocardiaceae	0	1.13379	0	0	2.26757	0	0	0	2.26757	0	0	0	0	0	0	0	0	0	0	0	0	0	0	0	0	0	0	0	1.13379	0	0	0	1.13379	0	0	4.53515	0	0	0	0	0	0	1.13379	0	0	1.13379	0	0	0
QNYZ01	0	0	0	0	0	0	0	1.46263	0	0	0	0	0	0	0	0	0	0	0	0	0	0	0	0	0	0	0	0	0	0	0	0	0	1.46263	0	0	0	0	0	0	0	0	0	0	0	0	0	0	1.46263
RKRQ01	1.51883	0	0	0	0	0	0	0	0	0	0	0	0	0	0	0	0	0	0	0	0	0	0	1.51883	0	0	0	0	0	0	0	0	0	0	0	0	0	0	0	0	0	0	0	0	0	0	0	0	0
RKRQ02 (a)	0	0	0	0	0	0	0	0	1.87371	0	0	0	0	0	0	0	0	0	0	0	0	0	0	3.74742	0	0	0	0	0	0	0	0	0	0	0	1.87371	0	0	0	0	0	0	0	0	0	0	0	0	0
RKRQ02 (b)	1.76772	0	0	0	0	1.76772	0	0	0	0	0	0	0	0	0	0	0	0	0	0	0	0	0	0	0	0	0	0	0	0	0	0	0	0	0	0	0	0	0	0	0	0	0	0	0	0	0	0	0
RKSH01	0	0	0	0	1.61473	0	0	0	1.61473	0	0	0	0	0	0	0	0	0	0	0	0	0	0	0	0	0	0	0	0	1.61473	0	0	0	1.61473	0	0	0	0	0	0	0	0	1.61473	0	0	0	0	0	1.61473
Rhodobacteraceae	0	0	0	0	1.18287	0	0	1.18287	1.18287	0	0	0	0	0	0	0	0	0	0	0	0	0	0	2.36574	0	0	0	0	0	0	0	0	2.36574	1.18287	0	0	0	0	0	0	0	0	1.18287	0	0	1.18287	1.18287	0	0
SG8-13 (a)	1.86776	0	0	0	0	0	0	0	0	0	0	0	0	0	0	0	0	0	0	0	0	0	0	0	0	0	0	0	0	0	0	0	0	0	0	0	0	0	0	0	0	0	0	0	0	0	0	0	0
SG8-13 (b)	1.86672	0	0	0	0	3.73343	0	1.86672	0	0	0	0	0	0	0	0	0	0	0	0	0	0	0	0	0	0	0	0	0	0	0	0	0	0	0	1.86672	0	0	0	0	0	0	0	0	0	0	0	0	0
SG8-38	0	0	0	0	2.68962	0	0	0	0	0	0	0	0	0	0	0	0	0	0	0	0	0	0	1.34481	0	0	0	0	0	0	0	0	1.34481	0	0	0	0	0	0	0	0	0	1.34481	0	0	0	0	0	0
SG8-41	2.42014	0	0	0	2.42014	1.21007	0	1.21007	0	0	0	0	0	0	0	0	0	0	0	0	0	0	0	0	0	0	0	0	0	0	0	0	1.21007	1.21007	0	0	0	0	0	0	0	0	2.42014	0	0	0	0	0	0
SM23-39	0	0	0	0	0	0	0	0	0	0	0	0	0	0	0	0	0	0	0	0	0	0	0	1.07296	0	0	0	0	0	0	0	0	0	1.07296	0	0	0	0	0	0	0	0	1.07296	0	0	1.07296	1.07296	0	0
SZUA-229	0	0	0	1.06724	0	0	0	1.06724	0	0	0	0	0	0	0	0	0	0	0	0	0	0	0	2.13447	0	1.06724	0	0	0	0	0	0	0	1.06724	0	0	0	0	0	0	0	0	1.06724	0	1.06724	0	0	0	0
SZUA-232	0	0	0	0	1.11433	3.34299	0	0	0	0	0	0	0	0	0	0	0	0	0	0	0	0	0	2.22866	0	0	0	0	0	0	0	1.11433	0	0	0	4.45732	0	0	0	0	0	0	2.22866	0	0	1.11433	1.11433	0	0
SZUA-584	0	0	0	0	0	0	0	0	0	0	0	0	0	0	0	0	0	0	0	0	0	0	0	0	0	0	0	0	0	0	0	0	0	0	0	0	0	0	0	0	0	0	1.69434	0	0	0	1.69434	0	0
Sporolactobacillaceae (a)	0	0	0	0	0	0	0	0	0	0	0	0	0	0	0	0	0	0	1.57803	0	0	0	0	0	0	1.57803	0	0	0	0	0	0	0	0	0	1.57803	0	0	0	0	0	0	1.57803	0	0	1.57803	0	0	0
Sporolactobacillaceae (b)	0	0	0	0	0	0	0	1.67813	0	0	0	0	0	0	0	0	0	0	0	0	0	0	0	0	0	0	0	0	0	0	0	0	0	0	0	0	0	0	0	0	0	0	5.0344	0	0	0	0	0	0
Streptomycetaceae	0	1.33458	0	0	1.33458	0	0	0	4.00374	0	0	0	1.33458	1.33458	0	0	0	0	0	0	0	1.33458	0	4.00374	1.33458	1.33458	0	0	0	0	0	0	0	0	0	1.33458	0	0	0	0	0	0	2.66916	0	0	1.33458	1.33458	0	0
UBA11606	0	0	0	0	2.3596	1.1798	0	0	3.53941	0	0	0	0	0	0	0	0	0	0	0	0	0	0	2.3596	0	0	0	0	0	0	0	0	0	0	0	8.25861	0	0	0	0	0	0	2.3596	0	0	1.1798	0	0	0
UBA4486	0	0	0	0	0	0	0	1.66722	0	0	0	0	0	0	0	0	0	0	0	0	0	0	0	0	0	0	0	0	0	0	0	0	0	1.66722	0	0	0	0	0	0	0	0	0	0	0	0	0	0	0
UBA5704 (a)	0	0	0	0	0	0	0	0	0	0	0	0	0	0	0	0	0	0	0	0	0	0	0	0	0	0	0	0	0	0	0	0	0	1.24969	0	1.24969	0	0	0	0	0	0	0	0	0	0	0	0	0
UBA5704 (b)	0	0	0	0	0	0	0	0	1.08026	0	0	0	0	0	0	0	0	0	0	0	0	0	0	1.08026	0	0	0	0	0	0	1.08026	0	2.16053	1.08026	0	1.08026	0	0	0	0	0	0	1.08026	0	0	0	0	0	0
UBA5704 (c)	0	0	0	0	0	0	0	0	0	0	0	0	0	0	0	0	0	1.1989	0	0	0	0	0	1.1989	0	0	0	0	0	0	0	0	1.1989	0	0	1.1989	0	0	0	0	0	0	2.39779	0	0	0	0	0	0
UBA6522 (a)	1.6116	0	0	0	0	1.6116	0	0	1.6116	0	0	0	0	0	0	0	0	0	0	0	0	0	0	1.6116	0	0	0	0	0	0	0	0	0	0	0	0	0	0	0	0	0	0	0	0	0	0	0	0	0
UBA6522 (b)	0	0	1.20934	0	0	0	0	1.20934	2.41867	0	0	0	0	0	0	0	0	0	0	0	0	0	0	1.20934	0	2.41867	0	0	0	0	0	0	1.20934	1.20934	0	0	0	0	0	0	0	0	1.20934	0	1.20934	0	0	0	0
UBA6522 (c)	0	0	0	0	1.48898	4.46694	0	0	0	0	0	0	0	0	0	0	0	0	0	0	0	0	0	0	0	0	0	0	0	0	0	0	1.48898	0	0	0	1.48898	0	0	0	0	0	0	0	0	0	0	0	0
UBA6522 (d)	1.81686	0	0	0	0	9.0843	0	0	1.81686	0	0	0	0	0	0	0	0	0	0	0	0	0	0	1.81686	0	1.81686	0	0	0	0	0	0	0	1.81686	0	0	0	0	0	0	0	0	1.81686	0	0	0	0	0	0
UBA6522 (e)	2.62329	0	0	1.31165	1.31165	1.31165	0	1.31165	1.31165	0	0	0	0	0	0	0	0	0	0	0	0	0	0	0	0	0	0	0	0	0	0	0	0	0	0	0	0	0	0	0	0	0	1.31165	0	0	0	0	0	0
UBA8139	0	0	0	0	0	0	0	0	0	0	0	0	0	0	0	0	0	0	0	0	0	0	0	0	0	0	0	0	0	0	0	0	1.43575	0	0	4.30725	0	0	0	0	0	0	1.43575	0	0	0	1.43575	0	0
UMGS416	0	0	0	0	0	1.47907	0	0	0	0	0	0	0	0	0	0	0	0	0	0	0	0	0	0	0	0	0	0	0	0	0	0	5.91628	0	0	0	0	0	0	0	1.47907	0	2.95814	0	0	0	0	0	0
Woeseiaceae (a)	0	0	0	0	0	0	0	0	6.85989	0	0	0	0	0	0	0	0	0	0	0	0	0	0	0	0	0	0	0	0	0	0	0	1.71497	1.71497	0	0	0	0	0	0	0	0	1.71497	0	0	0	0	0	0
Woeseiaceae (b)	0	0	0	0	0	1.3132	0	2.6264	2.6264	0	0	0	0	0	0	0	0	0	0	0	0	0	0	1.3132	0	2.6264	0	0	0	0	0	0	0	0	0	0	0	0	0	0	1.3132	0	1.3132	0	0	0	0	1.3132	0
ZC4RG35 (a)	0	0	0	0	0	0	0	0	0	1.26279	0	0	0	0	0	0	0	0	0	0	0	0	0	6.31393	0	0	0	0	0	0	0	0	0	0	0	2.52557	0	0	0	0	0	0	1.26279	0	0	0	1.26279	0	0
ZC4RG35 (b)	0	0	0	0	1.3887	0	0	0	0	0	0	0	0	0	0	0	0	0	0	0	0	0	0	2.77739	0	0	0	0	0	0	0	0	1.3887	0	0	2.77739	0	0	0	0	0	0	0	0	0	0	1.3887	0	0
[truncated: 141 more columns]

## Sheet: Enriched CAZymes
MAGs	CAZy familiy	p-value
70-9 (a)	GH39	3.6213e-05
70-9 (b)	GT4	0.000112521
Anaerolineaceae	CBM50	0.000203704
Bacillaceae_C	CBM50	5.11439e-09
Bacillaceae_C	GH170	0
Balneolaceae (a)	CE3	0
Balneolaceae (b)	GH10	3.01172e-06
Balneolaceae (b)	GH53	4.3944e-05
CECT-8803	AA3	8.15388e-05
Cellulomonadaceae	AA10	1.02218e-05
Cellulomonadaceae	CBM12	0
Cellulomonadaceae	CBM13	0
Cellulomonadaceae	CBM2	4.59913e-07
Cellulomonadaceae	CBM22	0
Cellulomonadaceae	CBM32	2.95151e-09
Cellulomonadaceae	CBM35	0
Cellulomonadaceae	CBM5	5.58134e-05
Cellulomonadaceae	GH11	0
Cellulomonadaceae	GH36	5.58134e-05
Cellulomonadaceae	GH42	1.55969e-06
Cellulomonadaceae	GH48	0
Cellulomonadaceae	GH55	0
Cellulomonadaceae	GH59	0
Cellulomonadaceae	GH78	0
Cellulomonadaceae	GH87	0
Cellulomonadaceae	PL11	0
Cyclobacteriaceae	GH109	1.13504e-06
Cyclobacteriaceae	GH32	1.24579e-05
Cyclobacteriaceae	PL42	0
DSSB01	GH23	0.000194883
DSSB01	GH24	0
DSSB01	GH65	0.000145556
Desulfobacterales	GT75	0
Domibacillaceae	CBM50	2.12159e-05
E44-bin32 (a)	GH66	0
E44-bin32 (a)	GH94	0.000136313
E44-bin32 (b)	CE1	9.24756e-05
GWA1-39-11	GT2	7.78555e-07
GWC2-71-9	GH172	5.80677e-05
GWC2-71-9	GH30	0
GWC2-71-9	GH84	0
GWC2-71-9	GH9	2.56251e-05
GWC2-71-9	GH92	0
HGW-15	AA4	5.75735e-06
HGW-15	GT81	9.29058e-06
Halobacteriales (a)	GT66	0
Halobacteriales (b)	GH26	1.66225e-05
Halobacteriales (b)	GH67	7.82162e-06
Halobacteriales (b)	GH81	0
Hyphomicrobiaceae	CE4	6.80324e-06
Hyphomicrobiaceae	GH102	3.46054e-05
Hyphomicrobiaceae	GH15	8.47659e-05
Hyphomicrobiaceae	GT83	8.35704e-06
J153	GT23	0
JABDQX01	CBM26	0
JABDQX01	CE16	3.17716e-05
JABDQX01	GH119	0
JACQBZ02	GT105	0.000221011
JAENVV01	GH13	3.93435e-06
JAFGWO01	GH153	0
JAFGWO01	GH57	4.15446e-05
Lacipirellulaceae	GH137	0
Lacipirellulaceae	GH159	0
Lacipirellulaceae	GH28	4.56184e-09
Lacipirellulaceae	GH43	5.70807e-10
Lacipirellulaceae	GH76	0
Latescibacterales	CE1	2.40963e-05
Latescibacterales	CE15	9.6258e-06
Latescibacterales	CE6	0
Latescibacterales	GH115	0
Latescibacterales	GH146	2.75304e-05
Latescibacterales	GH43	2.5957e-06
Latescibacterales	GH51	7.77048e-05
Latescibacterales	GH54	0
Latescibacterales	GH67	0.000228661
Latescibacterales	PL39	0
Methyloligellaceae	AA5	0.000159236
Methyloligellaceae	GH103	2.31101e-05
Micropepsaceae	GT7	0
Micropepsaceae	GT83	1.11651e-05
Nitriliruptoraceae	GH176	5.53753e-06
Nitriliruptoraceae	PL1	1.12265e-05
Nitrososphaeraceae (a)	GT2	2.18869e-05
Nitrososphaeraceae (a)	GT27	0
Nitrososphaeraceae (b)	GT11	0.000108084
Nitrososphaeraceae (b)	GT14	0
Nitrososphaeraceae (b)	GT55	0
Nitrososphaeraceae (b)	GT94	0.000108084
Paenibacillaceae	GH144	0
Paenibacillaceae	GT108	0
Planctomycetaceae	CBM38	0
Planctomycetaceae	CBM47	0
Planctomycetaceae	CBM51	5.55406e-09
Planctomycetaceae	CE12	2.9512e-05
Planctomycetaceae	CE17	0
Planctomycetaceae	CE19	1.09074e-10
Planctomycetaceae	GH163	0
Planctomycetaceae	GH165	0
Planctomycetaceae	GH166	0
Planctomycetaceae	GH33	1.04026e-16
Planctomycetaceae	PL10	0
Promineofilaceae (a)	GH39	5.7455e-06
Promineofilaceae (b)	CBM20	0
Promineofilaceae (b)	GH39	7.46046e-07
Promineofilaceae (b)	GH99	0
Promineofilaceae (b)	GT4	8.17829e-05
Promineofilaceae (b)	GT84	0
Pseudonocardiaceae	CBM6	0
Pseudonocardiaceae	GH18	3.68541e-05
Pseudonocardiaceae	GH183	0
Pseudonocardiaceae	GH184	0
Pseudonocardiaceae	GH25	8.16798e-06
Pseudonocardiaceae	GT53	0
Pseudonocardiaceae	GT85	0
RKRQ02 (b)	GH152	0
RKRQ02 (b)	GT10	0
Rhodobacteraceae	GH108	0
Rhodobacteraceae	GH8	0
SG8-13 (a)	GH19	0
SG8-38	GH133	7.41097e-05
SG8-38	GT3	0
SG8-41	GT102	0
SG8-41	GT41	0.000197983
SM23-39	GT11	0.000164797
SM23-39	GT9	2.28855e-05
SZUA-229	AA2	0.000165245
SZUA-229	GT9	6.69954e-06
SZUA-232	GT78	0
SZUA-232	PL14	9.85049e-09
Sporolactobacillaceae (a)	CBM34	0
Sporolactobacillaceae (b)	CE4	9.5993e-08
Streptomycetaceae	CBM16	0
Streptomycetaceae	CBM4	0
Streptomycetaceae	GH6	0
UBA11606	CE14	1.47337e-05
UBA5704 (b)	GT2	9.5513e-05
UBA6522 (b)	AA12	0
UBA6522 (b)	GT25	8.97828e-05
UBA6522 (c)	AA4	0.000217802
UBA6522 (c)	GT25	0.000116075
UBA6522 (d)	AA4	5.58356e-10
UBA6522 (d)	GH73	8.36562e-05
UBA6522 (e)	AA2	9.12462e-05
UBA8139	GH114	5.22956e-05
UMGS416	CE1	2.9789e-05
UMGS416	GH51	2.95253e-07
Woeseiaceae (a)	AA7	9.71973e-07
Woeseiaceae (a)	GH23	0.00020331
Woeseiaceae (a)	GT17	0
Woeseiaceae (b)	GH9	3.59345e-05
ZC4RG35 (a)	CBM11	0
ZC4RG35 (a)	CBM48	1.9443e-05
ZC4RG35 (a)	GH26	1.544e-05

## Sheet: HeatMap Enriched Lignocellulase
MAGs	GH48	GH9	GH8	GH6	CBM2	CBM5	CBM6	CBM4	CBM51	CE3	GH10	GH53	CBM13	CBM22	CBM32	GH11	GH42	GH94	CE1	GH30	GH26	GH67	CE4	GH102	CBM26	CE16	GH43	GH76	CE15	CE6	GH115	GH51	GH54	CBM38	CE12	CE17	CE19	CBM34	CBM16	CE14	CBM35	AA3	AA10	AA4	AA5	AA2	AA12	AA7	PL11
Halobacteriales (b)	0	0	0	0	0	0	0	0	0	0	0	0	0	0	0	0	0	0	0	0	3.28731	3.28731	3.28731	0	0	0	0	0	0	0	0	0	0	0	0	0	1.64366	0	0	0	0	0	0	0	0	0	0	1.64366	0
Latescibacterales	0	0	0	0	0	0	0	0	0	0	3.03337	0	0	0	0	0	0	0	8.08898	0	0	3.03337	3.03337	0	0	0	8.08898	0	4.04449	1.01112	1.01112	5.05561	1.01112	0	0	0	0	0	0	2.02224	0	0	0	1.01112	0	0	0	0	0
UBA6522 (c)	0	0	0	0	0	0	0	0	0	0	0	0	0	0	0	0	0	0	1.48898	0	0	1.48898	0	0	0	0	0	0	1.48898	0	0	0	0	0	0	0	0	0	0	0	0	1.48898	0	4.46694	0	0	0	0	0
Woeseiaceae (b)	0	2.6264	0	0	0	0	0	0	0	0	1.3132	0	0	0	0	0	0	0	0	0	0	1.3132	1.3132	0	0	0	0	0	0	0	0	1.3132	0	0	0	0	0	0	0	0	0	0	0	1.3132	0	0	0	2.6264	0
Cellulomonadaceae	1.11857	1.11857	0	0	4.47427	2.23714	0	0	0	0	2.23714	0	7.82998	1.11857	5.59284	1.11857	4.47427	0	2.23714	0	0	1.11857	2.23714	0	0	0	6.71141	0	0	0	0	2.23714	0	0	0	0	0	0	0	3.3557	1.11857	2.23714	3.3557	0	1.11857	0	0	2.23714	1.11857
Flavobacteriaceae	0	0	0	0	0	0	0	0	0	0	0	0	0	0	0	0	0	0	1.07677	0	0	1.07677	0	0	0	0	1.07677	0	0	0	0	2.15355	0	0	0	0	0	0	0	1.07677	0	0	0	0	0	0	0	0	0
UMGS416	0	0	0	0	0	0	0	0	0	0	0	0	0	0	0	0	0	0	5.91628	0	1.47907	0	2.95814	0	0	0	0	0	0	0	0	5.91628	0	0	0	0	0	0	0	0	0	0	0	1.47907	0	0	0	0	0
E44-bin32 (b)	0	0	0	0	0	0	0	0	0	0	0	0	0	0	0	0	0	0	4.23669	0	0	0	0	0	0	0	0	0	0	0	0	0	0	0	0	0	0	0	0	0	0	0	0	1.41223	0	0	0	0	0
Promineofilaceae (b)	0	0	0	0	0	0	0	0	0	0	0	0	0	0	0	0	0	0	3.68279	0	0	0	3.68279	0	0	0	0	0	0	0	0	1.2276	0	0	0	0	0	0	0	2.45519	0	0	0	0	0	0	0	1.2276	0
Anaerolineaceae	0	0	0	0	0	0	0	0	0	0	0	0	0	0	0	0	0	1.49993	2.99985	0	0	0	1.49993	0	0	0	0	0	0	0	0	0	0	0	0	0	0	0	0	1.49993	0	0	0	0	0	0	0	0	0
Rhodobacteraceae	0	0	1.18287	0	0	0	0	0	0	0	0	0	0	0	0	0	0	0	2.36574	0	0	0	1.18287	0	0	0	0	0	0	0	0	0	0	0	0	0	0	0	0	0	0	1.18287	0	0	0	0	0	1.18287	0
UBA5704 (b)	0	0	0	0	0	0	0	0	0	0	0	0	0	0	0	0	0	0	2.16053	0	0	0	1.08026	0	0	0	0	0	0	0	0	0	0	0	0	0	0	0	0	1.08026	0	0	0	0	0	0	0	1.08026	0
Paenibacillaceae	0	0	0	0	0	0	0	0	0	0	1.92308	0	0	0	0	0	0	0	1.92308	0	0	0	1.92308	0	0	0	0	0	0	0	0	0	0	0	0	0	0	0	0	1.92308	0	0	0	0	0	0	0	0	0
Woeseiaceae (a)	0	0	0	0	0	0	0	0	0	0	0	0	0	0	0	0	0	0	1.71497	0	0	0	1.71497	0	0	0	0	0	0	0	0	0	0	0	0	0	0	0	0	0	0	0	0	0	0	0	0	6.85989	0
GWC2-71-9	0	3.15906	0	0	0	0	0	0	0	0	0	1.57953	0	0	0	0	0	0	1.57953	3.15906	0	0	9.47718	0	0	0	4.73859	0	1.57953	0	0	3.15906	0	0	0	0	0	0	0	1.57953	0	0	0	1.57953	0	0	0	3.15906	0
UBA8139	0	0	0	0	0	0	0	0	0	0	0	0	0	0	0	0	0	0	1.43575	0	0	0	1.43575	0	0	0	0	0	0	0	0	0	0	0	0	0	0	0	0	4.30725	0	0	0	0	0	0	0	0	0
Balneolaceae (b)	0	0	0	0	0	0	0	0	0	0	4.2349	2.82326	0	0	0	0	0	0	1.41163	0	0	0	0	0	0	0	0	0	2.82326	0	0	1.41163	0	0	0	0	0	0	0	1.41163	0	0	0	0	0	0	0	0	0
ZC4RG35 (b)	0	0	0	0	0	0	0	0	0	0	0	0	0	0	0	0	0	0	1.3887	0	1.3887	0	0	0	0	0	0	0	0	0	0	0	0	0	0	0	0	0	0	2.77739	0	1.3887	0	0	0	0	0	0	0
SG8-38	0	0	0	0	0	0	0	0	0	0	0	0	0	0	0	0	0	0	1.34481	0	0	0	1.34481	0	0	0	0	0	0	0	0	0	0	0	0	0	0	0	0	0	0	2.68962	0	0	0	0	0	0	0
Desulfobacterales	0	0	0	0	0	0	0	0	0	0	0	0	0	0	0	0	0	0	1.2663	0	0	0	1.2663	1.2663	0	0	0	0	0	0	0	0	0	0	0	0	0	0	0	0	0	0	0	1.2663	0	0	0	1.2663	0
SG8-41	0	0	0	0	0	0	0	0	0	0	0	0	0	0	0	0	0	0	1.21007	0	0	0	2.42014	0	0	0	0	0	0	0	0	0	0	0	0	0	0	0	0	0	0	2.42014	0	1.21007	0	0	0	0	0
UBA6522 (b)	0	0	0	0	0	0	0	0	0	0	0	0	0	0	0	0	0	0	1.20934	0	0	0	1.20934	0	0	0	0	0	0	0	0	0	0	0	0	0	0	0	0	0	0	0	0	0	0	0	1.20934	2.41867	0
UBA5704 (c)	0	0	0	0	0	0	0	0	0	0	0	0	0	0	1.1989	0	0	0	1.1989	0	0	0	2.39779	0	0	0	0	0	0	0	0	0	0	0	0	0	0	0	0	1.1989	0	0	0	0	0	0	0	0	0
Pseudonocardiaceae	0	0	0	0	0	0	1.13379	0	0	0	0	0	0	0	0	0	0	0	1.13379	0	0	0	1.13379	0	0	0	1.13379	0	0	0	0	0	0	0	0	0	0	0	0	4.53515	0	2.26757	1.13379	0	0	0	0	2.26757	0
Planctomycetaceae	0	0	0	0	1.12969	0	0	0	5.64844	0	1.12969	0	0	0	0	0	0	0	1.12969	0	0	0	3.38906	0	0	0	1.12969	0	1.12969	0	0	0	0	1.12969	2.25938	1.12969	7.90782	0	0	5.64844	0	0	0	0	0	0	0	0	0
HGW-15	0	0	0	0	0	0	0	0	0	0	0	0	0	0	0	0	0	0	1.09541	0	0	0	0	0	0	0	0	0	0	0	0	0	0	0	0	0	0	0	0	0	0	0	0	5.47705	0	0	0	0	0
Streptomycetaceae	0	0	0	2.66916	1.33458	1.33458	0	1.33458	0	0	0	0	0	0	0	0	1.33458	0	0	0	0	0	2.66916	0	0	0	1.33458	0	0	0	0	0	0	0	0	0	0	0	1.33458	1.33458	0	1.33458	1.33458	0	0	0	0	4.00374	0
CECT-8803	0	0	0	0	0	0	0	0	0	0	0	0	0	0	0	0	0	0	0	0	0	0	0	0	0	0	0	0	0	0	0	0	0	0	0	0	0	0	0	1.57704	0	3.15408	0	0	0	0	0	1.57704	0
UBA11606	0	0	0	0	0	0	0	0	0	0	0	0	0	0	0	0	0	0	0	0	0	0	2.3596	0	0	0	4.71921	0	0	0	0	0	0	0	0	0	0	0	0	8.25861	0	2.3596	0	1.1798	0	0	0	3.53941	0
RKSH01	0	0	0	0	0	0	0	0	0	0	0	0	0	0	0	0	0	0	0	0	0	0	1.61473	1.61473	0	0	0	0	0	0	0	0	0	0	0	0	0	0	0	0	0	1.61473	0	0	0	0	0	1.61473	0
70-9 (b)	0	0	0	0	0	0	0	0	0	0	0	0	0	0	0	0	0	0	0	0	0	0	2.82925	0	0	0	0	0	0	0	0	0	0	0	0	0	0	0	0	0	0	1.41463	0	0	0	0	0	1.41463	0
UBA6522 (e)	0	0	0	0	0	0	0	0	0	0	0	0	0	0	0	0	0	0	0	0	0	0	1.31165	0	0	0	1.31165	0	0	0	0	0	0	0	0	0	0	0	0	0	0	1.31165	0	1.31165	0	1.31165	0	1.31165	0
Nitriliruptoraceae	0	0	0	0	0	0	0	0	0	0	0	0	0	0	0	0	0	0	0	0	1.27453	0	0	0	0	0	0	0	0	0	0	0	0	0	0	0	0	0	0	3.8236	0	1.27453	0	2.54907	0	0	0	0	0
JAENVV01	0	0	0	0	0	0	0	0	0	0	0	0	0	0	0	0	0	0	0	0	0	0	2.45038	0	0	0	0	0	0	0	0	0	0	0	0	0	0	0	0	2.45038	0	1.22519	0	0	0	0	0	2.45038	0
Methyloligellaceae	0	0	0	0	0	0	0	0	0	0	0	0	0	0	0	0	0	0	0	0	0	0	2.28076	1.14038	0	0	0	0	0	0	0	0	0	0	0	0	0	0	0	0	0	1.14038	0	0	1.14038	0	0	0	0
J153	0	0	0	0	0	0	0	0	0	0	0	0	0	0	0	0	0	0	0	0	0	0	3.39789	0	0	0	0	0	0	0	0	0	0	0	0	0	0	0	0	0	0	1.13263	0	0	0	0	0	0	0
SZUA-232	0	0	0	0	0	0	0	0	0	0	0	0	0	0	0	0	0	0	0	0	0	0	2.22866	0	0	0	0	0	0	0	0	0	0	0	0	0	0	0	0	4.45732	0	1.11433	0	3.34299	0	0	0	0	0
Lacipirellulaceae	0	0	0	0	0	0	0	0	1.46542	0	1.46542	1.46542	0	0	0	0	0	0	0	0	0	0	0	0	0	1.46542	10.2579	1.46542	0	0	0	1.46542	0	0	1.46542	0	0	0	0	1.46542	0	0	0	0	0	0	0	0	0
Sporolactobacillaceae (a)	0	0	0	0	0	0	0	0	0	0	0	0	0	0	0	0	0	0	0	0	0	0	1.57803	0	0	0	0	0	0	0	0	0	0	0	0	0	0	1.57803	0	1.57803	0	0	0	0	0	0	0	0	0
Domibacillaceae	0	0	0	0	0	0	0	0	0	0	0	0	0	0	0	0	0	0	0	0	0	0	4.21112	0	0	0	0	0	0	0	0	0	0	0	0	0	0	0	0	0	0	0	0	1.40371	0	0	0	0	0
SZUA-584	0	0	0	0	0	0	0	0	0	0	0	0	0	0	0	0	0	0	0	0	0	0	1.69434	0	0	0	0	0	0	0	0	0	0	0	0	0	0	0	0	0	0	0	0	0	0	0	0	0	0
GWA1-39-11	0	0	0	0	0	0	0	0	0	0	0	0	0	0	0	0	0	0	0	0	0	0	0	0	0	0	0	0	0	0	0	0	0	0	0	0	0	0	0	0	0	0	0	0	0	0	0	0	0
Alkalibacteraceae	0	0	0	0	0	0	0	0	0	0	0	0	0	0	0	0	0	0	0	0	0	0	2.32775	0	0	0	0	0	0	0	0	0	0	0	0	0	0	0	0	0	0	0	0	0	0	0	0	0	0
RKRQ02 (b)	0	0	0	0	0	0	0	0	0	0	0	0	0	0	0	0	0	0	0	0	0	0	0	0	0	0	0	0	0	0	0	0	0	0	0	0	0	0	0	0	0	0	0	1.76772	0	0	0	0	0
JABDQX01	0	0	0	0	0	0	0	0	0	0	0	0	0	0	0	0	0	0	0	0	0	0	1.28684	0	1.28684	2.57367	0	0	0	0	0	0	0	0	0	0	0	0	0	1.28684	0	0	0	0	0	0	0	1.28684	0
Micropepsaceae	0	0	0	0	0	0	0	0	0	0	0	0	0	0	0	0	0	0	0	0	0	0	0	0	0	0	0	0	0	0	0	0	0	0	0	0	0	0	0	0	0	0	0	0	0	0	0	0	0
UBA6522 (a)	0	0	0	0	0	0	0	0	0	0	0	0	0	0	0	0	0	0	0	0	0	0	0	0	0	0	0	0	0	0	0	0	0	0	0	0	0	0	0	0	0	0	0	1.6116	0	0	0	1.6116	0
Nitrososphaeraceae (b)	0	0	0	0	0	0	0	0	0	0	0	0	0	0	0	0	0	0	0	0	0	0	1.28353	0	0	0	0	0	0	0	0	0	0	0	0	0	0	0	0	0	0	0	0	0	0	0	0	0	0
UBA6522 (d)	0	0	0	0	0	0	0	0	0	0	0	0	0	0	0	0	0	0	0	0	0	0	1.81686	0	0	0	0	0	0	0	0	0	0	0	0	0	0	0	0	0	0	0	0	9.0843	0	0	0	1.81686	0
Nitrososphaeraceae (a)	0	0	0	0	0	0	0	0	0	0	0	0	0	0	0	0	0	0	0	0	0	0	0	0	0	0	0	0	0	0	0	0	0	0	0	0	0	0	0	0	0	0	0	0	0	0	0	0	0
UBA4486	0	0	0	0	0	0	0	0	0	0	0	0	0	0	0	0	0	0	0	0	0	0	0	0	0	0	0	0	0	0	0	0	0	0	0	0	0	0	0	0	0	0	0	0	0	0	0	0	0
Cyclobacteriaceae	0	0	0	0	0	0	0	0	0	0	0	0	0	0	0	0	0	0	0	0	2.46245	0	1.23122	0	0	0	0	0	0	0	0	0	0	0	0	0	1.23122	0	0	3.69367	0	0	0	1.23122	0	0	0	0	0
SM23-39	0	0	0	0	0	0	0	0	0	0	0	0	0	0	0	0	0	0	0	0	0	0	1.07296	0	0	0	0	0	0	0	0	0	0	0	0	0	0	0	0	0	0	0	0	0	0	0	0	0	0
Sporolactobacillaceae (b)	0	0	0	0	0	0	0	0	0	0	0	0	0	0	0	0	0	0	0	0	0	0	5.0344	0	0	0	0	0	0	0	0	0	0	0	0	0	0	0	0	0	0	0	0	0	0	0	0	0	0
Bacillaceae_C	0	0	0	0	0	0	0	0	0	0	0	0	0	0	0	0	1.14969	0	0	0	0	0	4.59876	0	0	0	0	0	0	0	0	0	0	0	0	0	0	0	0	2.29938	0	0	0	1.14969	0	0	0	0	0
QNYZ01	0	0	0	0	0	0	0	0	0	0	0	0	0	0	0	0	0	0	0	0	0	0	0	1.46263	0	0	0	0	0	0	0	0	0	0	0	0	0	0	0	0	0	0	0	0	0	0	0	0	0
SG8-13 (b)	0	0	0	0	0	0	0	0	0	0	0	0	0	0	0	0	0	0	0	0	0	0	0	0	0	0	0	0	0	0	0	0	0	0	0	0	0	0	0	1.86672	0	0	0	3.73343	0	0	0	0	0
SG8-13 (a)	0	0	0	0	0	0	0	0	0	0	0	0	0	0	0	0	0	0	0	0	0	0	0	0	0	0	0	0	0	0	0	0	0	0	0	0	0	0	0	0	0	0	0	0	0	0	0	0	0
JACQBZ02	0	0	0	0	0	0	0	0	0	0	0	0	0	0	0	0	0	0	0	0	0	0	1.1755	0	0	0	0	0	0	0	0	0	0	0	0	0	0	0	0	1.1755	0	0	0	0	0	0	0	0	0
Balneolaceae (a)	0	0	0	0	0	0	0	0	0	1.4298	0	0	0	0	0	0	0	0	0	0	0	0	0	0	0	0	1.4298	0	0	0	0	1.4298	0	0	0	0	0	0	0	2.85959	0	0	0	0	0	0	0	0	0
HXMU1428-3	0	0	0	0	0	0	0	0	0	0	0	0	0	0	0	0	0	0	0	0	0	0	1.40154	0	0	0	0	0	0	0	0	0	0	0	0	0	0	0	0	0	0	0	0	0	0	0	0	0	0
70-9 (a)	0	0	0	0	0	0	0	0	0	0	0	0	0	0	0	0	1.04037	0	0	0	0	0	2.08073	0	0	0	0	0	0	0	0	0	0	0	0	0	0	0	0	0	0	0	0	0	0	0	0	2.08073	0
Promineofilaceae (a)	0	0	0	0	0	0	0	0	0	0	0	0	0	0	0	0	0	0	0	0	0	0	2.96868	0	0	0	0	0	0	0	0	0	0	0	0	0	0	0	0	1.48434	0	0	0	0	0	0	0	0	0
RKRQ01	0	0	0	0	0	0	0	0	0	0	0	0	0	0	0	0	0	0	0	0	0	0	0	0	0	0	0	0	0	0	0	0	0	0	0	0	0	0	0	0	0	0	0	0	0	0	0	0	0
RKRQ02 (a)	0	0	0	0	0	0	0	0	0	0	0	0	0	0	0	0	0	0	0	0	0	0	0	0	0	0	0	0	0	0	0	0	0	0	0	0	0	0	0	1.87371	0	0	0	0	0	0	0	1.87371	0
UBA5704 (a)	0	0	0	0	0	0	0	0	0	0	0	0	0	0	0	0	0	0	0	0	0	0	0	0	0	0	0	0	0	0	0	0	0	0	0	0	0	0	0	1.24969	0	0	0	0	0	0	0	0	0
Halobacteriales (a)	0	0	0	0	0	0	0	0	0	0	0	0	0	0	0	0	0	0	0	0	0	0	1.10059	0	0	0	0	0	0	0	0	0	0	0	0	0	1.10059	0	0	0	0	0	0	0	0	0	0	1.10059	0
ZC4RG35 (a)	0	0	0	0	0	0	0	0	0	0	0	0	0	0	0	0	0	0	0	0	3.78836	0	1.26279	0	0	0	0	0	0	0	0	0	0	0	0	0	0	0	0	2.52557	0	0	0	0	0	0	0	0	0
E44-bin32 (a)	0	0	0	0	0	0	0	0	0	0	0	0	0	0	0	0	0	1.39237	0	0	0	0	1.39237	0	0	0	0	0	0	0	0	0	0	0	0	0	0	0	0	1.39237	0	0	0	0	0	0	0	0	0
Hyphomicrobiaceae	0	0	0	0	0	0	0	0	0	0	0	0	0	0	0	0	0	0	0	0	0	0	11.9237	3.97456	0	0	0	0	0	0	0	0	0	0	0	0	0	0	0	0	0	0	0	1.98728	0	0	0	0	0
SZUA-229	0	0	0	0	0	0	0	0	0	0	0	0	0	0	0	0	0	0	0	0	0	0	1.06724	0	0	0	0	0	0	0	0	0	0	0	0	0	0	0	0	0	0	0	0	0	0	1.06724	0	0	0
JAFGWO01	0	0	0	0	0	0	0	0	0	0	0	0	0	0	0	0	0	0	0	0	0	0	0	1.30412	0	0	0	0	0	0	0	0	0	0	0	0	0	0	0	0	0	0	0	0	0	0	0	0	0
Jiangellales	0	0	0	0	0	0	0	0	0	0	0	0	0	0	0	0	0	0	0	0	0	0	1.3009	0	0	0	0	0	0	0	0	0	0	0	0	0	0	0	0	2.6018	0	0	0	0	0	0	0	1.3009	0
DSSB01	0	0	0	0	0	0	0	0	0	0	0	0	0	0	0	0	0	0	0	0	0	0	1.09457	0	0	0	0	0	0	0	0	0	0	0	0	0	0	0	0	0	0	0	0	0	0	0	0	1.09457	0
[truncated: 3 more columns]

## Sheet: Lignocellulases A-C-D Groups
MAG ID	Category	Completeness	Contamination	Size (bp)	Contigs	GTDB classification	Lignocellulases
L_1	A	63.37	0.39	4662417	810	f__Sporolactobacillaceae;g__Tuberibacillus;s__Tuberibacillus calidus	9
L_2	A	52	0.38	6126983	793	f__Paenibacillaceae;g__Cohnella;s__Cohnella laeviribosi	9
L_3	A	71.24	9.57	5992854	2570	f__Domibacillaceae;g__Bacillus_O;s__Bacillus_O smithii	15
LW_1	A	58.7	0	3337006	78	o__Levybacterales;f__GWA1-39-11;g__;s__	4
LW_3	A	98.9	2.4	1987127	313	o__Latescibacterales;f__;g__;s__	78
LW_7	A	59.02	1.4	1879557	89	o__Christensenellales;f__SZUA-584;g__;s__	4
LW_12	A	85.92	4.58	2495734	576	f__Alkalibacteraceae;g__Alkalibacter;s__	5
LW_13	A	70.84	0.55	2849898	491	f__Balneolaceae;g__;s__	24
LW_16	A	67.61	0.7	2121777	233	o__Christensenellales;f__UMGS416;g__;s__	25
L_4	C	59.59	5.84	2081417	858	f__Sporolactobacillaceae;g__Caenibacillus;s__Caenibacillus caldisaponilyticus	5
L_6	C	93.2	1.58	3268770	805	o__Chlamydiales;f__SM23-39;g__;s__	9
L_7	C	92.87	7.41	4436114	844	f__Flavobacteriaceae;g__Robiginitalea;s__	40
L_8	C	74.93	3.57	5416541	1051	f__Streptomycetaceae;g__Streptomyces;s__	48
L_9	C	84.54	6.71	4033388	702	f__Rhodobacteraceae;g__Qingshengfaniella;s__	30
L_11	C	89.4	1.41	1951779	310	f__Cellulomonadaceae;g__Myceligenerans;s__	108
L_14	C	88.52	0	2519919	660	f__Planctomycetaceae;g__Gimesia;s__	79
LW_4	C	86.98	5.25	1829572	292	f__Bacillaceae_C;g__Weizmannia;s__Weizmannia coagulans	24
LW_5	C	81.22	4.88	1555086	327	f__Cyclobacteriaceae;g__;s__	44
LW_9	D	68.37	1.29	846947	143	o__Desulfobacterales;f__QNYZ01;g__QNYZ01;s__	11
LW_10	D	76.24	5.78	2479507	812	c__Gammaproteobacteria;o__UBA6522;f__UBA6522;g__;s__	17
LW_14	D	81.46	4.91	3608464	934	f__Promineofilaceae;g__JAAYYY01;s__	41
LW_15	D	78.97	4.62	5117016	1002	o__Desulfobacterales;f__;g__;s__	9
P_4	D	53.54	9.2	3201652	346	o__Desulfobacterales;f__SG8-13;g__;s__	10
P_11	D	53.57	3.23	3033526	546	o__Desulfobacterales;f__SG8-13;g__SG8-13;s__	14
