# Supplementary material for: Lignocellulose-mediated selection of halophilic PET-degrading enzymes from mangrove soil
Source: Research Square preprint supplement (doi:10.21203/rs.3.rs-7600602/v1), 2025-09-30
Supplement: Supplementary file 5 [file 6d83a649bfdd5cb359c3900b.xlsx]

## Sheet: Networks
Network properties	Soil (S)	C	CW	L	LW	P	PW
Number of nodesa	648	682	842	321	532	599	760
Number of edgesb	5829	4110	6716	1075	3064	3438	5884
Positive edgesc	4282	2719	3944	588	1850	2268	3448
Negative edgesd	1547	1391	2772	487	1214	1170	2436
Modularitye	0.763	1.683	3.004	4.992	2.515	1.573	2.865
Number of communitiesf	67	95	45	52	42	98	52
Network diameterg	16	12	12	21	14	14	11
Average path lengthh	5.125	5.504	5.142	8.305	5.774	5.967	5.275
Average degreei	19.9	12	15.9	6.7	11.5	11.4	15.4
Av. clustering coefficientj	0.401	0.394	0.404	0.386	0.422	0.443	0.435
Positive edgesc	0.734603	0.661557	0.587254	0.546977	0.603786	0.659686	0.585996
Negative edgesd	0.265397	0.338443	0.412746	0.453023	0.396214	0.340314	0.414004
aMicrobial taxon (at genus level) with at least one significant (P < 0.01) and strong (SparCC > 0.7 or < -0.7) correlation;
bNumber of connections/correlations obtained by SparCC analysis;
cSparCC positive correlation (> 0.7 with P < 0.01);
dSparCC negative correlation (< -0.7 with P < 0.01);
eThe capability of the nodes to form highly connected communities, that is, a structure with high density of between nodes connections (inferred by Gephi);
fA community is defined as a group of nodes densely connected internally (Gephi);
gThe longest distance between nodes in the network, measured in number of edges (Gephi);
hAverage network distance between all pair of nodes or the average length off all edges in the network (Gephi);
iThe average number of connections per node in the network, that is, the node connectivity (Gephi);
jHow nodes are embedded in their neighborhood and the degree to which they tend to cluster together (Gephi).
