# Supplementary material for: Lignocellulose-mediated selection of halophilic PET-degrading enzymes from mangrove soil
Source: Research Square preprint supplement (doi:10.21203/rs.3.rs-7600602/v1), 2025-09-30
Supplement: Supplementary file 6 [file 780255f3868cf6405ddd9f8c.xlsx]

## Sheet: MAGsFeatures
Treatment	ID	Category	Completeness	Contamination	MAG size bp	Contigs	N50	GTDB classification	Closest_placement_reference	Closest_placement_ANI	Closest_placement_taxonomy	Bin_set	Unique_SCGs	Redundant_SCGs
L	L_3	A	71.24	9.57	5992854	2570	2677	d__Bacteria;p__Firmicutes;c__Bacilli;o__Bacillales_B;f__Domibacillaceae;g__Bacillus_O;s__Bacillus_O smithii	GCF_001050115.1	98.45	d__Bacteria;p__Firmicutes;c__Bacilli;o__Bacillales_B;f__Domibacillaceae;g__Bacillus_O;s__Bacillus_O smithii	maxbin	43	0
L	L_1	A	63.37	0.39	4662417	810	9067	d__Bacteria;p__Firmicutes;c__Bacilli;o__Bacillales_G;f__Sporolactobacillaceae;g__Tuberibacillus;s__Tuberibacillus calidus	GCF_000430685.1	99.32	d__Bacteria;p__Firmicutes;c__Bacilli;o__Bacillales_G;f__Sporolactobacillaceae;g__Tuberibacillus;s__Tuberibacillus calidus	maxbin	49	2
L	L_2	A	52.00	0.38	6126983	793	9100	d__Bacteria;p__Firmicutes;c__Bacilli;o__Paenibacillales;f__Paenibacillaceae;g__Cohnella;s__Cohnella laeviribosi	GCF_000378425.1	99.17	d__Bacteria;p__Firmicutes;c__Bacilli;o__Paenibacillales;f__Paenibacillaceae;g__Cohnella;s__Cohnella laeviribosi	metabat	44	0
LW	LW_13	A	70.84	0.55	2849898	491	6904	d__Bacteria;p__Bacteroidota;c__Rhodothermia;o__Balneolales;f__Balneolaceae;g__;s__	N/A	N/A	N/A	metabat	35	1
LW	LW_7	A	59.02	1.4	1879557	89	44432	d__Bacteria;p__Firmicutes_A;c__Clostridia;o__Christensenellales;f__SZUA-584;g__;s__	N/A	N/A	N/A	metabat	41	0
LW	LW_16	A	67.61	0.7	2121777	233	12005	d__Bacteria;p__Firmicutes_A;c__Clostridia;o__Christensenellales;f__UMGS416;g__;s__	GCA_016938675.1	77.57	d__Bacteria;p__Firmicutes_A;c__Clostridia;o__Christensenellales;f__UMGS416;g__JAFGUF01;s__JAFGUF01 sp016938675	metabat	27	0
LW	LW_12	A	85.92	4.58	2495734	576	4434	d__Bacteria;p__Firmicutes_A;c__Clostridia;o__Eubacteriales;f__Alkalibacteraceae;g__Alkalibacter;s__	GCF_017352215.1	78.06	d__Bacteria;p__Firmicutes_A;c__Clostridia;o__Eubacteriales;f__Alkalibacteraceae;g__Alkalibacter;s__Alkalibacter sp017352215	metabat	36	2
LW	LW_3	A	98.90	2.4	1987127	313	7412	d__Bacteria;p__Latescibacterota;c__Latescibacteria;o__Latescibacterales;f__;g__;s__	N/A	N/A	N/A	metabat	47	1
LW	LW_1	A	58.70	0	3337006	78	354584	d__Bacteria;p__Patescibacteria;c__Microgenomatia;o__Levybacterales;f__GWA1-39-11;g__;s__	N/A	N/A	N/A	maxbin	50	1
C	C_10	B	92.57	3.68	2492544	362	8497	d__Bacteria;p__Acidobacteriota;c__Thermoanaerobaculia;o__UBA5704;f__UBA5704;g__;s__	GCA_006227875.1	76.1	d__Bacteria;p__Acidobacteriota;c__Thermoanaerobaculia;o__UBA5704;f__UBA5704;g__M0029;s__M0029 sp006227875	metabat	31	1
C	C_14	B	83.41	5.13	1416100	626	2585	d__Bacteria;p__Acidobacteriota;c__Thermoanaerobaculia;o__UBA5704;f__UBA5704;g__M0029;s__	GCA_006227875.1	84.25	d__Bacteria;p__Acidobacteriota;c__Thermoanaerobaculia;o__UBA5704;f__UBA5704;g__M0029;s__M0029 sp006227875	maxbin	34	5
C	C_4	B	54.47	2.17	4527891	498	13578	d__Bacteria;p__Proteobacteria;c__Alphaproteobacteria;o__Micropepsales;f__Micropepsaceae;g__CAIYRG01;s__	GCA_903862715.1	77.11	d__Bacteria;p__Proteobacteria;c__Alphaproteobacteria;o__Micropepsales;f__Micropepsaceae;g__CAIYRG01;s__CAIYRG01 sp903862715	metabat	34	7
C	C_9	B	77.71	4.93	1983493	436	4689	d__Bacteria;p__Proteobacteria;c__Gammaproteobacteria;o__HK1;f__JABDQX01;g__;s__	GCA_013042035.1	75.91	d__Bacteria;p__Proteobacteria;c__Gammaproteobacteria;o__HK1;f__JABDQX01;g__JABDQX01;s__JABDQX01 sp013042035	metabat	30	0
CW	CW_3	B	77.91	4.37	2754669	381	9099	d__Archaea;p__Thermoproteota;c__Nitrososphaeria;o__Nitrososphaerales;f__Nitrososphaeraceae;g__TH1177;s__	N/A	N/A	N/A	metabat	45	1
CW	CW_2	B	84.63	8.84	3821289	718	5879	d__Archaea;p__Thermoproteota;c__Nitrososphaeria;o__Nitrososphaerales;f__Nitrososphaeraceae;g__TH5896;s__	N/A	N/A	N/A	metabat	44	0
CW	CW_7	B	70.81	0	2845984	551	5483	d__Bacteria;p__Chloroflexota;c__Anaerolineae;o__Anaerolineales;f__E44-bin32;g__;s__	GCA_011046615.1	76.04	d__Bacteria;p__Chloroflexota;c__Anaerolineae;o__Anaerolineales;f__E44-bin32;g__DSPQ01;s__DSPQ01 sp011046615	metabat	42	4
CW	CW_14	B	63.31	5.69	2763061	359	9669	d__Bacteria;p__Gemmatimonadota;c__Gemmatimonadetes;o__Gemmatimonadales;f__GWC2-71-9;g__WVYX01;s__	GCA_011772755.1	76.2	d__Bacteria;p__Gemmatimonadota;c__Gemmatimonadetes;o__Gemmatimonadales;f__GWC2-71-9;g__WVYX01;s__WVYX01 sp011772755	metabat	36	6
CW	CW_6	B	87.69	9.14	6114872	2074	3608	d__Bacteria;p__Proteobacteria;c__Alphaproteobacteria;o__Rhizobiales;f__Methyloligellaceae;g__MnTg02;s__	GCA_008974985.1	75.37	d__Bacteria;p__Proteobacteria;c__Alphaproteobacteria;o__Rhizobiales;f__Methyloligellaceae;g__MnTg02;s__MnTg02 sp008974985	maxbin	45	6
CW	CW_12	B	59.98	1.49	3209209	554	9925	d__Bacteria;p__Proteobacteria;c__Gammaproteobacteria;o__UBA4486;f__UBA4486;g__;s__	N/A	N/A	N/A	maxbin	41	9
CW	CW_11	B	55.04	2.66	1294879	276	4769	d__Bacteria;p__Proteobacteria;c__Gammaproteobacteria;o__UBA6522;f__UBA6522;g__;s__	N/A	N/A	N/A	metabat	29	0
CW	CW_8	B	82.69	4.97	2747129	463	7011	d__Bacteria;p__Proteobacteria;c__Gammaproteobacteria;o__UBA6522;f__UBA6522;g__;s__	N/A	N/A	N/A	metabat	41	4
CW	CW_10	B	67.16	1.67	3443082	1532	2527	d__Bacteria;p__Proteobacteria;c__Gammaproteobacteria;o__UBA6522;f__UBA6522;g__;s__	N/A	N/A	N/A	maxbin	39	5
CW	CW_5	B	62.05	3.38	1939522	398	5298	d__Bacteria;p__Proteobacteria;c__Gammaproteobacteria;o__UBA6522;f__UBA6522;g__UBA6522;s__	GCA_002311835.1	76.34	d__Bacteria;p__Proteobacteria;c__Gammaproteobacteria;o__UBA6522;f__UBA6522;g__UBA6522;s__UBA6522 sp002311835	metabat	39	1
P	P_8	B	56.57	5.04	4654007	463	21881	d__Bacteria;p__Desulfobacterota_D;c__UBA1144;o__RKRQ01;f__;g__;s__	N/A	N/A	N/A	metabat	48	14
L	L_11	C	89.40	1.41	1951779	310	7175	d__Bacteria;p__Actinobacteriota;c__Actinomycetia;o__Actinomycetales;f__Cellulomonadaceae;g__Myceligenerans;s__	N/A	N/A	N/A	vamb	29	0
L	L_8	C	74.93	3.57	5416541	1051	11041	d__Bacteria;p__Actinobacteriota;c__Actinomycetia;o__Streptomycetales;f__Streptomycetaceae;g__Streptomyces;s__	N/A	N/A	N/A	maxbin	41	7
L	L_7	C	92.87	7.41	4436114	844	5872	d__Bacteria;p__Bacteroidota;c__Bacteroidia;o__Flavobacteriales;f__Flavobacteriaceae;g__Robiginitalea;s__	N/A	N/A	N/A	metabat	34	1
L	L_6	C	93.20	1.58	3268770	805	4030	d__Bacteria;p__Chlamydiota;c__Chlamydiia;o__Chlamydiales;f__SM23-39;g__;s__	GCA_002773835.1	77.36	d__Bacteria;p__Chlamydiota;c__Chlamydiia;o__Chlamydiales;f__SM23-39;g__21-14-0-10-35-9;s__21-14-0-10-35-9 sp002773835	metabat	33	0
L	L_4	C	59.59	5.84	2081417	858	2822	d__Bacteria;p__Firmicutes;c__Bacilli;o__Bacillales_G;f__Sporolactobacillaceae;g__Caenibacillus;s__Caenibacillus caldisaponilyticus	GCF_002003465.1	98.98	d__Bacteria;p__Firmicutes;c__Bacilli;o__Bacillales_G;f__Sporolactobacillaceae;g__Caenibacillus;s__Caenibacillus caldisaponilyticus	maxbin	44	7
L	L_14	C	88.52	0	2519919	660	3767	d__Bacteria;p__Planctomycetota;c__Planctomycetia;o__Planctomycetales;f__Planctomycetaceae;g__Gimesia;s__	GCF_009720525.1	94.75	d__Bacteria;p__Planctomycetota;c__Planctomycetia;o__Planctomycetales;f__Planctomycetaceae;g__Gimesia;s__Gimesia benthica	metabat	35	3
L	L_9	C	84.54	6.71	4033388	702	6626	d__Bacteria;p__Proteobacteria;c__Alphaproteobacteria;o__Rhodobacterales;f__Rhodobacteraceae;g__Qingshengfaniella;s__	GCF_007855645.1	77.2	d__Bacteria;p__Proteobacteria;c__Alphaproteobacteria;o__Rhodobacterales;f__Rhodobacteraceae;g__Qingshengfaniella;s__Qingshengfaniella alkalisoli	metabat	30	0
LW	LW_5	C	81.22	4.88	1555086	327	4959	d__Bacteria;p__Bacteroidota;c__Bacteroidia;o__Cytophagales;f__Cyclobacteriaceae;g__;s__	N/A	N/A	N/A	metabat	44	0
LW	LW_4	C	86.98	5.25	1829572	292	7213	d__Bacteria;p__Firmicutes;c__Bacilli;o__Bacillales_B;f__Bacillaceae_C;g__Weizmannia;s__Weizmannia coagulans	GCF_000290615.1	98.66	d__Bacteria;p__Firmicutes;c__Bacilli;o__Bacillales_B;f__Bacillaceae_C;g__Weizmannia;s__Weizmannia coagulans	metabat	45	0
LW	LW_14	D	81.46	4.91	3608464	934	3788	d__Bacteria;p__Chloroflexota;c__Anaerolineae;o__Promineofilales;f__Promineofilaceae;g__JAAYYY01;s__	GCA_012515125.1	76.29	d__Bacteria;p__Chloroflexota;c__Anaerolineae;o__Promineofilales;f__Promineofilaceae;g__JAAYYY01;s__JAAYYY01 sp012515125	metabat	36	3
LW	LW_15	D	78.97	4.62	5117016	1002	8873	d__Bacteria;p__Desulfobacterota;c__Desulfobacteria;o__Desulfobacterales;f__;g__;s__	N/A	N/A	N/A	maxbin	39	7
LW	LW_9	D	68.37	1.29	846947	143	7724	d__Bacteria;p__Desulfobacterota;c__Desulfobacteria;o__Desulfobacterales;f__QNYZ01;g__QNYZ01;s__	GCA_003973265.1	76.88	d__Bacteria;p__Desulfobacterota;c__Desulfobacteria;o__Desulfobacterales;f__QNYZ01;g__QNYZ01;s__QNYZ01 sp003973265	vamb	38	0
LW	LW_10	D	76.24	5.78	2479507	812	3870	d__Bacteria;p__Proteobacteria;c__Gammaproteobacteria;o__UBA6522;f__UBA6522;g__;s__	N/A	N/A	N/A	maxbin	43	6
P	P_4	D	53.54	9.2	3201652	346	13948	d__Bacteria;p__Desulfobacterota;c__Desulfobacteria;o__Desulfobacterales;f__SG8-13;g__;s__	GCA_001303025.1	77.57	d__Bacteria;p__Desulfobacterota;c__Desulfobacteria;o__Desulfobacterales;f__SG8-13;g__SG8-13;s__SG8-13 sp001303025	metabat	49	3
P	P_11	D	53.57	3.23	3033526	546	6241	d__Bacteria;p__Desulfobacterota;c__Desulfobacteria;o__Desulfobacterales;f__SG8-13;g__SG8-13;s__	GCA_001303025.1	82.65	d__Bacteria;p__Desulfobacterota;c__Desulfobacteria;o__Desulfobacterales;f__SG8-13;g__SG8-13;s__SG8-13 sp001303025	metabat	39	6
C	C_1	E	80.02	1.71	3560256	313	16018	d__Bacteria;p__Acidobacteriota;c__Thermoanaerobaculia;o__UBA5704;f__UBA5704;g__;s__	GCA_006227875.1	77.26	d__Bacteria;p__Acidobacteriota;c__Thermoanaerobaculia;o__UBA5704;f__UBA5704;g__M0029;s__M0029 sp006227875	metabat	50	0
C	C_5	E	89.74	4.46	3458924	399	12848	d__Bacteria;p__Actinobacteriota;c__Acidimicrobiia;o__UBA5794;f__SZUA-232;g__SZUA-232;s__	GCA_003229305.1	76.71	d__Bacteria;p__Actinobacteriota;c__Acidimicrobiia;o__UBA5794;f__SZUA-232;g__SZUA-232;s__SZUA-232 sp003229305	metabat	38	3
C	C_11	E	88.20	1.04	2975987	963	4054	d__Bacteria;p__Actinobacteriota;c__Actinomycetia;o__Mycobacteriales;f__Pseudonocardiaceae;g__Actinopolyspora;s__	N/A	N/A	N/A	maxbin	33	3
C	C_12	E	69.94	8.83	2947713	646	4722	d__Bacteria;p__Bacteroidota;c__Rhodothermia;o__Balneolales;f__Balneolaceae;g__YR4-1;s__	GCA_011059145.1	77.32	d__Bacteria;p__Bacteroidota;c__Rhodothermia;o__Balneolales;f__Balneolaceae;g__YR4-1;s__YR4-1 sp011059145	metabat	41	10
C	C_13	E	67.37	5.91	4332011	291	29913	d__Bacteria;p__Chloroflexota;c__Anaerolineae;o__Promineofilales;f__Promineofilaceae;g__;s__	N/A	N/A	N/A	metabat	31	2
C	C_15	E	88.29	6.92	7022386	1482	4855	d__Bacteria;p__Proteobacteria;c__Alphaproteobacteria;o__Kiloniellales;f__J153;g__;s__	GCA_003693905.1	76.07	d__Bacteria;p__Proteobacteria;c__Alphaproteobacteria;o__Kiloniellales;f__J153;g__J153;s__J153 sp003693905	metabat	43	13
CW	CW_4	E	53.37	2.1	2631431	1205	2300	d__Bacteria;p__Desulfobacterota_D;c__UBA1144;o__RKRQ01;f__;g__;s__	N/A	N/A	N/A	maxbin	30	1
CW	CW_9	E	74.36	3.19	3486281	718	5154	d__Bacteria;p__Myxococcota;c__Polyangia;o__Polyangiales;f__SG8-38;g__SG8-38;s__	GCA_001303415.1	78.07	d__Bacteria;p__Myxococcota;c__Polyangia;o__Polyangiales;f__SG8-38;g__SG8-38;s__SG8-38 sp001303415	metabat	37	1
CW	CW_13	E	85.07	1.82	2453209	530	4742	d__Bacteria;p__Nitrospirota;c__Nitrospiria;o__JACQBZ01;f__;g__;s__	N/A	N/A	N/A	metabat	35	5
L	L_13	E	69.65	2.83	2682873	1309	2224	d__Bacteria;p__Actinobacteriota;c__Acidimicrobiia;o__Acidimicrobiales;f__UBA8139;g__M30B73;s__	GCA_018401565.1	77.71	d__Bacteria;p__Actinobacteriota;c__Acidimicrobiia;o__Acidimicrobiales;f__UBA8139;g__M30B73;s__M30B73 sp018401565	maxbin	35	4
L	L_10	E	65.84	3.52	2732078	458	6686	d__Bacteria;p__Desulfobacterota_D;c__UBA1144;o__RKRQ01;f__RKRQ01;g__;s__	N/A	N/A	N/A	metabat	31	1
L	L_12	E	63.41	1.74	3130603	662	4944	d__Bacteria;p__Proteobacteria;c__Alphaproteobacteria;o__Kiloniellales;f__CECT-8803;g__Limibacillus;s__	GCF_014191775.1	76.7	d__Bacteria;p__Proteobacteria;c__Alphaproteobacteria;o__Kiloniellales;f__CECT-8803;g__Limibacillus;s__Limibacillus halophilus	metabat	39	9
LW	LW_6	E	68.24	6.46	2979161	476	7386	d__Bacteria;p__Planctomycetota;c__Planctomycetia;o__Pirellulales;f__Lacipirellulaceae;g__Aeoliella;s__	GCF_007748035.1	76.96	d__Bacteria;p__Planctomycetota;c__Planctomycetia;o__Pirellulales;f__Lacipirellulaceae;g__Aeoliella;s__Aeoliella mucimassa	metabat	45	2
P	P_1	E	90.86	5.7	4525983	338	19891	d__Archaea;p__Halobacteriota;c__Halobacteria;o__Halobacteriales;f__Haladaptataceae;g__Haladaptatus;s__	N/A	N/A	N/A	metabat	51	0
P	P_10	E	60.84	7.38	1847680	390	5041	d__Archaea;p__Halobacteriota;c__Halobacteria;o__Halobacteriales;f__Haloarculaceae;g__Halomarina;s__	GCF_009791395.1	82.81	d__Archaea;p__Halobacteriota;c__Halobacteria;o__Halobacteriales;f__Haloarculaceae;g__Halomarina;s__Halomarina oriensis	metabat	27	0
P	P_3	E	81.62	8.12	3060204	393	10307	d__Bacteria;p__Actinobacteriota;c__Acidimicrobiia;o__UBA5794;f__JAENVV01;g__;s__	N/A	N/A	N/A	metabat	48	0
P	P_5	E	71.35	4.26	2571879	591	4453	d__Bacteria;p__Proteobacteria;c__Alphaproteobacteria;o__Rhizobiales;f__HXMU1428-3;g__HXMU1428-3;s__	GCA_017640685.1	75.74	d__Bacteria;p__Proteobacteria;c__Alphaproteobacteria;o__Rhizobiales;f__HXMU1428-3;g__HXMU1428-3;s__HXMU1428-3 sp017640685	metabat	43	0
P	P_7	E	82.64	4.53	2910933	576	9079	d__Bacteria;p__Proteobacteria;c__Gammaproteobacteria;o__Burkholderiales;f__SG8-41;g__SG8-41;s__	GCA_001303585.1	78.8	d__Bacteria;p__Proteobacteria;c__Gammaproteobacteria;o__Burkholderiales;f__SG8-41;g__SG8-41;s__SG8-41 sp001303585	maxbin	42	7
PW	PW_1	E	96.12	0	3598719	471	9721	d__Bacteria;p__Actinobacteriota;c__Thermoleophilia;o__Solirubrobacterales;f__70-9;g__;s__	N/A	N/A	N/A	metabat	48	0
C	C_3	F	79.19	9.4	4735029	1347	5446	d__Bacteria;p__Actinobacteriota;c__Acidimicrobiia;o__UBA5794;f__ZC4RG35;g__;s_	GCA_013812505.1	76.17	d__Bacteria;p__Actinobacteriota;c__Acidimicrobiia;o__UBA5794;f__ZC4RG35;g__JACCTH01;s__JACCTH01 sp013812505	maxbin	39	3
C	C_16	F	72.01	5.21	4435479	909	8186	d__Bacteria;p__Actinobacteriota;c__Acidimicrobiia;o__UBA5794;f__ZC4RG35;g__;s__	N/A	N/A	N/A	maxbin	26	0
C	C_6	F	78.46	1.42	3587363	232	19828	d__Bacteria;p__Actinobacteriota;c__Actinomycetia;o__Nitriliruptorales;f__Nitriliruptoraceae;g__;s__	N/A	N/A	N/A	vamb	33	0
C	C_7	F	71.82	4.55	4464149	2476	1851	d__Bacteria;p__Chloroflexota;c__Anaerolineae;o__Anaerolineales;f__E44-bin32;g__;s__	N/A	N/A	N/A	maxbin	39	6
C	C_2	F	91.29	8	4729919	766	10843	d__Bacteria;p__Desulfobacterota;c__DSM-4660;o__Desulfatiglandales;f__HGW-15;g__;s__	GCA_016930795.1	76.04	d__Bacteria;p__Desulfobacterota;c__DSM-4660;o__Desulfatiglandales;f__HGW-15;g__JAFGFY01;s__JAFGFY01 sp016930795	maxbin	50	3
C	C_8	F	93.70	3.16	3627856	1480	2918	d__Bacteria;p__Proteobacteria;c__Gammaproteobacteria;o__SZUA-229;f__SZUA-229;g__JABDQW01;s__	GCA_013042055.1	86.42	d__Bacteria;p__Proteobacteria;c__Gammaproteobacteria;o__SZUA-229;f__SZUA-229;g__JABDQW01;s__JABDQW01 sp013042055	maxbin	34	2
L	L_5	F	76.87	7.97	6997830	717	14456	d__Bacteria;p__Actinobacteriota;c__Actinomycetia;o__Jiangellales;f__;g__;s__	N/A	N/A	N/A	metabat	37	3
LW	LW_11	F	84.76	2.99	1462763	298	5036	d__Bacteria;p__Actinobacteriota;c__Acidimicrobiia;o__Acidimicrobiales;f__UBA11606;g__VXYK01;s__	GCA_009845995.1	76.86	d__Bacteria;p__Actinobacteriota;c__Acidimicrobiia;o__Acidimicrobiales;f__UBA11606;g__VXYK01;s__VXYK01 sp009845995	metabat	34	0
LW	LW_8	F	76.68	2.73	4102477	523	10339	d__Bacteria;p__BMS3Abin14;c__BMS3Abin14;o__BMS3Abin14;f__JAFGWO01;g__JAFGWO01;s__	GCA_016937135.1	77.48	d__Bacteria;p__BMS3Abin14;c__BMS3Abin14;o__BMS3Abin14;f__JAFGWO01;g__JAFGWO01;s__JAFGWO01 sp016937135	metabat	39	0
LW	LW_17	F	66.67	4.55	1186380	250	4895	d__Bacteria;p__Chloroflexota;c__Anaerolineae;o__Anaerolineales;f__Anaerolineaceae;g__Brevefilum;s__	N/A	N/A	N/A	metabat	26	0
P	P_2	F	50.32	4.11	3824352	302	17408	d__Bacteria;p__Proteobacteria;c__Alphaproteobacteria;o__Rhizobiales;f__Hyphomicrobiaceae;g__Hyphomicrobium_A;s__	N/A	N/A	N/A	metabat	50	0
P	P_6	F	61.93	2.76	1419768	325	4462	d__Bacteria;p__Proteobacteria;c__Gammaproteobacteria;o__Arenicellales;f__RKSH01;g__;s__	GCA_007570945.1	76.17	d__Bacteria;p__Proteobacteria;c__Gammaproteobacteria;o__Arenicellales;f__RKSH01;g__RKSH01;s__RKSH01 sp007570945	metabat	32	0
P	P_9	F	76.15	6.34	4389261	344	19128	d__Bacteria;p__Proteobacteria;c__Gammaproteobacteria;o__Woeseiales;f__Woeseiaceae;g__JAACFE01;s__	N/A	N/A	N/A	metabat	29	1
PW	PW_2	F	70.69	3.88	4782530	1063	4664	d__Bacteria;p__Actinobacteriota;c__Thermoleophilia;o__Solirubrobacterales;f__70-9;g__;s__	N/A	N/A	N/A	metabat	41	11
