# Supplementary material for: Lignocellulose-mediated selection of halophilic PET-degrading enzymes from mangrove soil
Source: Research Square preprint supplement (doi:10.21203/rs.3.rs-7600602/v1), 2025-09-30
Supplement: Supplementary file 7 [file 804fdef93fea2e440d3774a2.xlsx]

## Sheet: Processing
Treatments	Samples	Quality control		Taxonomic classification			Co-assembly					Binning			Refinement
		Initial depth	Final depth	Kraken2			Contigs	N50	Reads mapped to contigs			BINS			MAGs
				Total	%				Total	%		Maxbin	Metabat	Vamb
L	L1	79,959,134	76,328,936	26,331,679	34.5		2,874,526	966	23,096,894	30.3		295	132	33	16
	L2	70,891,536	67,816,225	24,752,179	36.5				21,445,559	31.6
	L3	69,035,708	66,092,864	21,803,570	32.9				19,855,056	30.1
LW	LW1	77,111,476	74,018,266	18,165,837	24.5		3,009,309	1006	20,923,678	28.1		328	149	67	14
	LW2	79,089,336	75,564,829	17,173,969	22.7				21,190,545	28.1
	LW3	74,403,847	71,242,794	16,525,157	23.2				20,623,782	28.9
P	P1	76,280,108	73,310,514	21,050,308	28.9		2,973,487	961	22,079,658	30.1		300	132	75	14
	P2	67,992,464	65,607,211	18,322,576	27.9				19,496,066 ​	29.7
	P3	78,614,505	75,354,452	20,629,063	27.4				22,990,071	30.5
PW	PW1	58,829,838	54,605,347	13,329,500	24.4		2,230,121	981	15,734,836	28.8		246	109	47	17
	PW2	47,928,466	45,021,876	11,068,145	24.6				12,549,008	27.5
	PW3	65,784,056	63,051,441	15,291,148	24.3				17,323,737	27.5
C	C1	71,004,510	68,102,541	19,246,111	28.3		2,660,685	967	20,647,231	30.3		269	128	46	11
	C2	73,691,022	70,589,083	20,207,107	28.6				20,168,655	28.6
	C3	66,426,805	61.5045	17,197,328	27.1				17,497,529	28.5
CW	CW1	57,040,789	54,303,279	13,015,280	23.9		2,449,290	955	15,903,895	29.3		286	133	74	2
	CW2	65,077,625	62,305,586	15,057,485	24.2				19,576,644	31.4
	CW3	56,916,016	54,396,260	13,650,559	25.1				16,527,748	30.4
