# Supplementary material for: Lignocellulose-mediated selection of halophilic PET-degrading enzymes from mangrove soil
Source: Research Square preprint supplement (doi:10.21203/rs.3.rs-7600602/v1), 2025-09-30
Supplement: Supplementary file 8 [file cf37c82920e2b299f3c5b27e.xlsx]

## Sheet: AI-based predictions
Sequence_id	sequence_length	molecular_weight_kda	isoelectric_point	extinction_coefficient_reduced	extinction_coefficient_oxidized	instability_index	avg_flexibility	n_complete	c_complete	Substrate	SMILES	kcat_(s^(-1))	KM_(mM)	solubility	pH	salt	temperature	TM	catalytic_efficiency_(M^(-1)s^(-1))
IsPETase	290	30.2465	9.65409	39420	39670	39.5072	1.00089	1	0	Hydroxy-ethyl-capped PET dimer	O=C(OCCO)c1ccc(C(=O)OOCCOC(=O)c2ccc(C(=O)OOCCO)cc2)cc1	202.397	1.13192	0.42947	5 a 9	0.05-4%	28.0692	50.5525	178809
Marinobacter_ERR12772908__k127_2792925_3	308	32.6177	4.632	48360	48735	31.0517	1.00105	1	0	Hydroxy-ethyl-capped PET dimer	O=C(OCCO)c1ccc(C(=O)OOCCOC(=O)c2ccc(C(=O)OOCCO)cc2)cc1	82.2827	2.13792	0.521626	5 a 9	>4%	32.6498	48.2814	38487.2
HaloPETase5	305	32.545	8.66721	43890	44140	40.4568	0.999509	1	0	Hydroxy-ethyl-capped PET dimer	O=C(OCCO)c1ccc(C(=O)OOCCOC(=O)c2ccc(C(=O)OOCCO)cc2)cc1	62.3427	2.11625	0.417871	5 a 9	>4%	29.9104	46.9688	29459.1
Microbulbifer_ERR12779715__k127_1039666_2	301	32.8655	4.91131	57300	57425	33.7509	0.99733	1	0	Hydroxy-ethyl-capped PET dimer	O=C(OCCO)c1ccc(C(=O)OOCCOC(=O)c2ccc(C(=O)OOCCO)cc2)cc1	12.0541	0.512667	0.409895	5 a 9	0.05-4%	28.0777	56.3027	23512.6
403	284	30.8979	4.51992	66350	66725	34.5736	0.99961	1	0	Hydroxy-ethyl-capped PET dimer	O=C(OCCO)c1ccc(C(=O)OOCCOC(=O)c2ccc(C(=O)OOCCO)cc2)cc1	33.3706	1.55387	0.55771	5 a 9	>4%	49.5614	48.9473	21475.8
Microbulbifer_ERR12772901__k127_721586_2	298	32.6971	5.23847	58790	58915	35.6326	0.999693	1	0	Hydroxy-ethyl-capped PET dimer	O=C(OCCO)c1ccc(C(=O)OOCCOC(=O)c2ccc(C(=O)OOCCO)cc2)cc1	10.6554	0.58527	0.406622	5 a 9	>4%	30.3211	56.8189	18206
LCC	259	27.9049	9.32485	38390	38515	35.7336	0.995904	1	0	Hydroxy-ethyl-capped PET dimer	O=C(OCCO)c1ccc(C(=O)OOCCOC(=O)c2ccc(C(=O)OOCCO)cc2)cc1	10.6421	0.876878	0.372393	5 a 9	>4%	44.8359	53.0579	12136.3
Marinobacter_ERR12779715__k127_2664185_2	306	32.5054	6.5851	39420	39795	30.4144	0.99715	1	0	Hydroxy-ethyl-capped PET dimer	O=C(OCCO)c1ccc(C(=O)OOCCOC(=O)c2ccc(C(=O)OOCCO)cc2)cc1	51.0666	4.62127	0.430805	9 a 14	>4%	32.4874	49.6285	11050.3
Halopseudomonas_bauzanensis	302	32.3909	5.66141	40910	41160	39.8229	0.999392	1	0	Hydroxy-ethyl-capped PET dimer	O=C(OCCO)c1ccc(C(=O)OOCCOC(=O)c2ccc(C(=O)OOCCO)cc2)cc1	37.7114	3.83167	0.463736	9 a 14	>4%	30.0194	48.2347	9842.03
503	259	27.591	5.12917	41370	41495	31.4139	0.999883	1	0	Hydroxy-ethyl-capped PET dimer	O=C(OCCO)c1ccc(C(=O)OOCCOC(=O)c2ccc(C(=O)OOCCO)cc2)cc1	7.99024	0.904655	0.487914	5 a 9	>4%	28.8861	46.7287	8832.36
GlacPETase	282	30.1236	9.58253	46870	46995	36.9667	0.996574	1	0	Hydroxy-ethyl-capped PET dimer	O=C(OCCO)c1ccc(C(=O)OOCCOC(=O)c2ccc(C(=O)OOCCO)cc2)cc1	14.4836	1.83999	0.327268	5 a 9	0.05-4%	25.5609	51.1668	7871.54
Micromonosopora_ERR12772901__k127_1301752_3	295	31.344	6.10044	49390	49515	47.0194	0.997053	1	0	Hydroxy-ethyl-capped PET dimer	O=C(OCCO)c1ccc(C(=O)OOCCOC(=O)c2ccc(C(=O)OOCCO)cc2)cc1	6.42629	2.9527	0.491163	5 a 9	>4%	27.1203	66.7803	2176.41
HaloPETase1	288	29.7135	5.92293	37930	38180	26.6271	1.00001	1	0	Hydroxy-ethyl-capped PET dimer	O=C(OCCO)c1ccc(C(=O)OOCCOC(=O)c2ccc(C(=O)OOCCO)cc2)cc1	5.31422	2.54515	0.422661	5 a 9	>4%	22.5216	49.4944	2087.98
PHL7	259	27.9589	5.51073	33920	34045	39.7298	0.999757	1	0	Hydroxy-ethyl-capped PET dimer	O=C(OCCO)c1ccc(C(=O)OOCCOC(=O)c2ccc(C(=O)OOCCO)cc2)cc1	2.98486	2.0369	0.570482	5 a 9	>4%	31.0995	48.0896	1465.39
Streptomyces_ERR12772901__k127_1254225_2	297	31.9379	5.00157	53860	53985	43.8152	1.00026	1	0	Hydroxy-ethyl-capped PET dimer	O=C(OCCO)c1ccc(C(=O)OOCCOC(=O)c2ccc(C(=O)OOCCO)cc2)cc1	2.55942	5.04931	0.51958	5 a 9	>4%	30.5468	54.7321	506.884
Isoptericola_ERR12772908__k127_861695_14	297	31.9339	5.00157	53860	53985	42.8418	0.999804	1	0	Hydroxy-ethyl-capped PET dimer	O=C(OCCO)c1ccc(C(=O)OOCCOC(=O)c2ccc(C(=O)OOCCO)cc2)cc1	2.52496	5.21039	0.525627	5 a 9	>4%	30.8529	55.1151	484.602
Isoptericola_ERR12779715__k127_2806838_3	297	31.9639	5.00157	53860	53985	42.3357	0.999849	1	0	Hydroxy-ethyl-capped PET dimer	O=C(OCCO)c1ccc(C(=O)OOCCOC(=O)c2ccc(C(=O)OOCCO)cc2)cc1	2.49852	5.18642	0.524513	5 a 9	>4%	30.7772	54.9303	481.743
701	262	28.4988	8.51977	36900	37025	38.7382	0.999427	1	0	Hydroxy-ethyl-capped PET dimer	O=C(OCCO)c1ccc(C(=O)OOCCOC(=O)c2ccc(C(=O)OOCCO)cc2)cc1	2.50406	6.08003	0.515147	5 a 9	>4%	32.2575	45.3655	411.85
T_curvata	289	31.1489	9.32305	39420	39545	37.3855	0.998112	1	0	Hydroxy-ethyl-capped PET dimer	O=C(OCCO)c1ccc(C(=O)OOCCOC(=O)c2ccc(C(=O)OOCCO)cc2)cc1	0.27561	0.69202	0.445009	5 a 9	>4%	26.7674	56.4009	398.269
L8_Streptomyces	267	28.1711	4.46922	50880	51005	32.994	0.997055	1	0	Hydroxy-ethyl-capped PET dimer	O=C(OCCO)c1ccc(C(=O)OOCCOC(=O)c2ccc(C(=O)OOCCO)cc2)cc1	1.7324	4.42008	0.540989	5 a 9	>4%	28.1733	63.2595	391.94
L11_Myceligenerans	297	31.9392	5.29185	53860	53985	46.2812	1.0002	1	0	Hydroxy-ethyl-capped PET dimer	O=C(OCCO)c1ccc(C(=O)OOCCOC(=O)c2ccc(C(=O)OOCCO)cc2)cc1	2.11202	5.83104	0.583929	5 a 9	>4%	29.3677	58.2894	362.204
606	263	28.8194	4.42522	39880	40005	37.643	1.0005	1	0	Hydroxy-ethyl-capped PET dimer	O=C(OCCO)c1ccc(C(=O)OOCCOC(=O)c2ccc(C(=O)OOCCO)cc2)cc1	1.25352	3.60802	0.605369	5 a 9	>4%	36.5883	47.3334	347.425
T_halotolerans	262	28.6864	5.23984	43890	44015	40.1126	1.00221	1	0	Hydroxy-ethyl-capped PET dimer	O=C(OCCO)c1ccc(C(=O)OOCCOC(=O)c2ccc(C(=O)OOCCO)cc2)cc1	1.78341	5.64902	0.555609	5 a 9	>4%	32.7494	45.6416	315.703
Spirillospora_ERR12772901__k127_86259_3	292	30.8765	6.5194	29910	30035	42.1682	0.998072	1	0	Hydroxy-ethyl-capped PET dimer	O=C(OCCO)c1ccc(C(=O)OOCCOC(=O)c2ccc(C(=O)OOCCO)cc2)cc1	1.03484	3.49259	0.538919	5 a 9	>4%	26.3421	58.8431	296.297
Micromonosopora_ERR12772908__k127_878592_2	343	36.8058	8.95152	27960	28085	52.8082	1.0006	1	0	Hydroxy-ethyl-capped PET dimer	O=C(OCCO)c1ccc(C(=O)OOCCOC(=O)c2ccc(C(=O)OOCCO)cc2)cc1	0.942255	3.2259	0.506149	5 a 9	>4%	25.8324	56.9768	292.091
Micromonosopora_ERR12772908__k127_1276758_2	335	35.7346	7.91074	33460	33585	56.9358	1.00115	1	0	Hydroxy-ethyl-capped PET dimer	O=C(OCCO)c1ccc(C(=O)OOCCOC(=O)c2ccc(C(=O)OOCCO)cc2)cc1	0.830596	3.52966	0.526919	5 a 9	>4%	26.0275	61.5121	235.319
