# Supplementary material for: Lignocellulose-mediated selection of halophilic PET-degrading enzymes from mangrove soil
Source: Research Square preprint supplement (doi:10.21203/rs.3.rs-7600602/v1), 2025-09-30
Supplement: Supplementary file 9 [file d94ea1787932896256e30e78.xlsx]

## Sheet: COGs_countsfixed
	COG category
MAGs IDs	A	B	C	D	E	F	G	H	I	J	K	L	M	N	O	P	Q	S	T	U	V	Z	W
L_1	0	0	118	38	175.333	58	89.6667	78.5	73.5	179	125.667	124.333	81.5	21.1667	55.6667	102.667	35.5	586	43.6667	23.6667	22	0	0
L_3	0	0	132.5	60.5	190.333	63.5	153	135.5	75.5	192.333	283.833	222.167	158	23.1667	82.3333	155.667	31	982	102	40	32	0	0
L_2	0	0	61	36.5	93.1667	40.5	168.333	56.5	31.5	135	158	38.5	48	42	42.5	102.333	10.5	428	90.6667	27.3333	16	0	0
LW_16	0	0	161	30.5	148.667	65	154.833	56	54	208	167.333	79.1667	99.5	41.6667	51.8333	103.333	33	438	78.6667	26.3333	58	1	0
LW_7	0	0	100.5	26	80.6667	26.5	57.3333	47	36.5	137	111	56	64	0	33.5	57.3333	11	266	34	27	34	0	0
LW_3	0	1	332.5	77	278.5	163.5	283.167	226.833	123.5	293.833	247	212	425.833	102.417	152.333	233.833	88	882	294.833	110.333	88	1	0.5
LW_1	0	2	44.5	16	37.5	59.5	45.5	36.5	22	162	47	82	164	2.5	49	28	18	206	18	27.5	20	0	0.5
LW_12	0	1	329.5	62.3333	204.167	113	128.833	209.5	76.5	270.333	250.5	131.833	151.167	8.66667	94.8333	192.333	41.5	622	86.6667	48.3333	58	0.666667	0
LW_13	0	0	135	32	144.167	81.5	133.833	136.5	60	175.5	132.333	94	256.667	6.75	92.5	88.8333	54	452	77.1667	48.5	42	0	0
P_8	0	0	195.5	27	135.833	87.5	55.1667	113	79	141.5	99.6667	91.3333	127.5	8.5	108.5	75.6667	50	452	79.3333	77	34	1	0
C_9	6	3.5	476.5	62.5	227.667	114.5	188.833	191	146	258	222.833	307.667	323.5	66	237.833	300.5	142	1224	284.333	117.333	73	2	0
C_4	2	0.5	193.833	28	175	50.5	117.833	139.667	113.5	187.5	104.833	51.3333	175.667	11	109.333	155.333	84.5	552	112.333	66.3333	52	0	0
C_10	4	1.5	447	60.5	369.833	171	154.333	199.167	214.5	268.5	338.833	209.833	522	36.0833	254.167	347.5	173.833	1188	281.5	180.833	98	1	1.33333
CW_1	2	1	391	36	342	117	144.5	151.833	163	222.167	188	130	248.333	22.25	173.333	184.667	139.5	880	137.5	108.5	74	0	1
CW_10	0	0.5	312.667	46.5	244.167	83.5	142.5	147.667	125	242.5	192.5	126	281.25	68.3333	141.833	196	80.5	770	162	130.5	116	0	0
CW_8	2	0	446.5	70.5	313	110	246.833	205.5	127	314	177.917	151.833	308	25.5	202.167	239.833	119.5	1150	182.167	178.333	70	0	0.5
CW_5	2	0.5	340.5	58.3333	246.5	95.5	181	165.5	119.5	237	161.5	121	249.5	69	149.5	231.5	123	938	149.667	168	56	0.666667	0
C_14	0	1.2	424	67.9	280.333	129.5	127.5	124.167	165.333	234.167	249.833	158.733	398.667	30.8333	219.5	214.667	97	1030	270.067	113.567	78	4	1
CW_3	0	0	141.5	12.5	146.667	82.3333	71	136	54	200	198.333	159.667	82	10	84	102.333	39	490	88.6667	15	24.6667	0	0.5
CW_7	0	0.2	218	28.4	138.667	68	82.3333	110.5	78.3333	189.667	173.417	122.233	181.833	5.33333	90.5	120.333	53	464	148.233	58.2333	46	0	0
CW_6	0.5	0.5	573.333	61	496.5	134.5	309.5	256.167	197	327.5	423.167	268.333	441.167	89.25	323.5	402.167	210	1634	344.833	136.5	94	1	0.333333
CW_14	8	3.5	482	69.8333	384.5	120	278	227.833	158	218.667	323	254	406	71.9167	204.667	231.5	119	1176	290.167	115.5	167	2.66667	1
CW_11	4	0	309.5	50.3333	210	74	214	127	111.5	198	219.667	89.6667	231.5	51.1667	182.5	224	138	890	142.333	150.667	78	0.666667	0
CW_2	2	0.5	251.5	24	187.667	101.333	79.5	155.5	68	236.5	226.833	212.667	129	6	131.5	112.333	99	592	117.667	26.5	30.6667	0	1
CW_12	2	0.5	160.333	30	118.833	68	52.8333	122.167	81	161.5	64.6667	97.8333	143.5	9.83333	93.6667	95.3333	63	356	97.3333	60.6667	16	2	0
L_9	0	0.5	411.5	68.8333	444.667	136.5	369.333	252.833	220.5	264.667	369.5	193	244	30.75	192.667	376.333	153.5	1224	156.167	92.5	74	0.666667	0
L_8	4	2	292.5	74.5	463	123	339.833	198.5	253.667	220.5	585.167	246.333	296.667	5.33333	134.167	268	194	918	311.333	61.1667	100	1	0.5
LW_5	0	0.5	243.833	33	250.833	91.5	261.167	164	118.5	194.167	169.833	110.167	287.5	9.75	122.5	177.667	97.6667	934	147.167	49.5	52	1	0
L_7	0	0.5	260	44	392.5	128.5	279	239.333	186.5	261.667	227.833	147.167	323.833	10.1667	170.167	175.5	89	1156	160.667	59.6667	68	0	0
L_11	0	0.5	354	62	441.333	142	529.167	263.833	190	297.5	728.333	293.833	300	9.5	167	363.667	150	1332	265	67	132	0	0
L_6	0	4	133.5	28.5	143.667	132.5	104.333	125	59	304	73.5	145	199.5	9.5	100.5	84.3333	40	406	70	83	36	0	0
L_4	0	0	43	18.5	72.8333	36.5	62.6667	29.5	40	102	82.3333	54	45	20.3333	45.8333	57.6667	20	384	41.6667	16.3333	22	0	0
LW_4	0	0.5	178	70	269.667	102.5	150.833	128.5	114	243.333	207.833	141.333	129.5	38.1667	88	178.333	49	898	82.3333	46	56	0	0
L_14	8	4.5	519.5	52.1667	352.833	122	387.167	248.333	161.5	292.833	361.667	180.333	375.5	152	214.333	381.667	143.5	1448	283.333	254.333	100	4.33333	0
LW_9	0	2	354.5	36	228.667	103.5	108.833	121	101.5	208	113.167	104.333	167.5	1.5	104.5	142.333	61	590	114.333	50	32	0	0
LW_10	4	0	356	64	277.667	108.5	208.333	179.5	127	280.5	212.833	141.5	303	47.5	212.667	207.333	103.5	856	173	155.333	116	0	0
P_11	0	2.5	397.5	38	265.333	93.5	144.667	116.5	101.5	155.5	107.667	93.8333	169.5	14.3333	131	181.667	89	600	170	60.6667	46	0	0
P_4	0	2	333.5	36	230.667	53	122.333	117.5	68.5	224.5	130.167	63.3333	135	44.3333	98.1667	124.333	57	542	170.333	43.6667	34	0	0
LW_15	0.5	2	769	58.5	530.167	126	253.333	225.5	184.5	247.5	234.667	159.667	363	11.3333	180.333	332.833	148	1036	359.333	74.6667	60	0	0
LW_14	1	3.7	521	69.4	392.167	143	314	240.5	192.5	271.167	385.167	222.567	442.167	15.5	217.5	326.333	164	1118	323.067	77.7333	161	0	1
CW_13	0	2.5	299.5	62.5	183.333	91	108.917	182.5	81.5	219.333	124.833	131	321	35.25	176	158.167	58	626	196.833	126	42	0	0
CW_9	0	0.5	316.833	41.3333	190.833	91.5	111.667	168.167	242	203	175.5	165.667	189.333	25.6667	163	109	119.667	720	193	122.667	42.6667	2	0
C_12	4	0	192	40.5	226.333	99.5	119.667	130.5	120.5	279	176.667	139.333	227	6	151.5	125.667	88	786	178.333	46	54	1	0
L_12	0	1.5	227.5	46.8333	401.667	77.5	185.167	164.167	157.5	200.5	231.5	96.8333	205.5	0	168	232.667	131	822	149.333	50.5	36	2.66667	0.5
LW_6	4	0	206.5	31.5	144.167	89.5	211.167	139.167	91.3333	196.333	160.5	160.667	155.5	72.4167	136.5	106.167	78.5	656	161.167	130	54	3	0.5
C_11	2	0.7	384.5	59.4	524.917	130.5	364.333	217.333	253.5	302.5	644	232.567	276	11.3333	181.167	305.833	247.5	1422	214.733	46.0667	95	0	0
P_5	0	0	119	23	97.3333	55.5	45.1667	108.5	60	148.5	93.8333	59.1667	94.8333	30.1667	69.6667	54.6667	37	388	86.6667	34.5	12	3	0.5
PW_1	2	1	263.5	53.3333	325.667	131.5	151.833	184.667	219	283.333	349.833	195.5	252.667	7.83333	147.667	212.333	142.5	660	138.333	63.6667	48	0	0
C_13	2	1.5	285.333	47.5	243.167	83	123.833	121.667	84.8333	243.667	229	120.833	236.167	5.33333	135.833	164.333	67	656	159.667	44.6667	63	1	1
L_13	0	0.2	232.5	41.4	243.5	71.5	89	123.5	252.5	204.5	271.333	118.567	201	2.5	99	186.5	187	760	114.067	45.4	82	1	0
L_10	2.5	0.5	149	28	85.3333	65.5	58.1667	86	39	177	102.833	66.1667	103.833	7.75	77.6667	61.1667	36	352	67.1667	52.8333	26	0	0
P_10	0	0	190.5	32	303.667	90.5	123.333	145	158.5	162	254	106	119	41	122	207.333	93	880	91	12	42	0	0
C_5	8.5	0.7	561.5	58.9	493.5	206.5	255	188	246	290.5	405.833	212.233	262.5	9.33333	216	281	196	1132	262.067	99.0667	132	3	0
C_15	2	1.83333	471.833	86.6667	615.5	132	243	228.5	230	267	359	212.333	371.333	82.8333	228.5	371	222.667	1332	303.667	100.667	66	1.33333	0
CW_4	0	0.5	130	22	112	63	77.5	97.5	64.5	143	75.3333	54.6667	118.5	6.58333	90.6667	67.5	31	340	43.1667	64.1667	30	0	0
C_1	0.5	1.7	423	49.9	314.167	167	140.75	166.667	166	260	229.917	197.733	455	16	195.667	244.667	126.5	1062	263.9	100.567	114	1	0.5
P_3	2	0.7	376	55.2333	439.583	150	242.667	155	226	236.5	320.833	209.567	223	8.33333	172.167	231.667	136	974	223.733	85.0667	104	1.66667	0
P_7	0	0.5	537.833	66.8333	329.5	126.5	214.167	244.667	203.5	297.333	194	158.333	290.5	22.5	223	269.667	187	1170	176.333	107	56	0.666667	0
P_1	0	0.5	317	44	589.167	154	276.833	238	186.5	258	490	286	232	36	189.5	351.333	119	1444	161	48	84	0	0
C_6	2	2.7	326	68.2333	341.167	110.833	183.5	194.5	238	235.5	380.167	179.4	244	41.5	175	260.833	162	984	266.4	53.4	100	1.66667	0
C_2	6	3.5	1130	69	673.5	123.5	236	269.5	341.5	298	300.667	201.167	269.5	24.9167	230.333	260	141	1034	376.5	146.833	50	0	0
C_3	4	0.5	418	43	456.167	177.5	294.333	169	225.5	250.5	376.333	181.5	215.5	26.8333	189.833	283.333	135	954	294.667	72.6667	120	1	0
C_16	4	2.7	285	44.4	374.667	123.5	172.333	136.5	174.5	187.5	298.5	124.4	133.5	2	126	159.333	120	708	204.9	49.4	92	1	0
C_7	0	2.7	358.5	47.4	213.667	101	136.833	120.5	120.5	209	220.333	121.067	217.5	3	128.5	170.333	71.5	642	176.067	81.4	94	1	0
P_2	0	1	314.333	92.5	323.667	136.5	151.333	328.5	159	381.667	250.167	198.333	347	28.25	256	188.333	85.6667	1056	205.833	115.5	60	1	0
P_9	2	1	352.5	68	350.833	142	190.667	171.833	146.5	259.167	265.5	146.667	276	18.5	185	228.667	120	886	178.667	114.5	74	0	0.5
PW_2	0	0.5	220.5	42.8333	237.333	65.5	127.667	131.167	152	192	183.333	120	221.667	5	103.667	157.667	93	570	118.667	37	50	0	0
LW_11	0	4.7	573.5	59.9	462.167	187	237.667	208.5	440	320.667	376.667	185.733	263.667	4.33333	192.167	230.833	331	1052	193.733	57.0667	103	1	0
C_8	4.5	1	480.5	82	282	145	208.5	218	150	332.833	220.5	195.833	377.25	98.8333	281.667	316.5	77	1062	305.667	164.167	86	0	0
P_6	2	0.5	191	32	277.667	81.5	107.833	162.667	85	159.333	107.833	85.8333	186	5.5	94.6667	130.833	73	434	86	56.5	25	0	0.5
LW_8	2	0.333333	194	32	127.833	89	102.667	120.5	41.3333	191.667	99.8333	96.3333	139.167	11	92.5	78.6667	10.6667	374	139.333	62	34	0	0
L_5	0.5	1	257	70.3333	286.667	96.5	208.167	139.5	170	232	264.167	240.333	178.333	4	123.333	205.333	116	994	168.333	54	82	2	0
LW_17	2	1.2	235.5	30.9	102.5	106.5	156.833	119	63	247	169	170.067	226.5	5.5	113	145	56	568	75.7333	29.4	62	0	0
LW_2	4	1	179	92	154.5	115	99	151.5	132.333	261.167	292.833	211.167	156	32.4167	140	136.5	65	904	115.167	72.1667	56	6	0
